# Supplementary material
Source: PubMed Central journal article supplement (PMC4210114)

**Nickel-Catalyzed Asymmetric Reductive Cross-Coupling Between Vinyl and Benzyl  
Electrophiles**

Alan H. Cherney and Sarah E. Reisman\*

*The Warren and Katharine Schlinger Laboratory of Chemistry and Chemical Engineering  
Division of Chemistry and Chemical Engineering, California Institute of Technology, Pasadena,  
California 91125  
reisman@caltech.edu*

**Supporting Information 1 (Experimental Procedures):**

## Table of Contents

|                                                       |     |
|-------------------------------------------------------|-----|
| 1. Materials and Methods                              | S3  |
| 2. Optimization of Reaction Parameters                | S4  |
| 3. Additional Substrate Scope                         | S5  |
| 4. Ligand Preparation                                 | S6  |
| 5. Substrate Preparation                              | S7  |
| 6. Enantioselective Reductive Cross-Coupling          | S14 |
| 7. SFC Traces of Racemic and Enantioenriched Products | S28 |
| 8. NMR Spectra of Unknown Compounds                   | S61 |

## 1. Materials and Methods

Unless otherwise stated, reactions were performed under a nitrogen atmosphere using freshly dried solvents. Tetrahydrofuran (THF), methylene chloride (CH<sub>2</sub>Cl<sub>2</sub>), and diethyl ether (Et<sub>2</sub>O), were dried by passing through activated alumina columns. Anhydrous dimethylacetamide (DMA) was purchased from Aldrich and stored under inert atmosphere. Manganese powder (– 325 mesh, 99.3%) was purchased from Alfa Aesar. NiCl<sub>2</sub>(dme) was purchased from Strem and stored in a glovebox under N<sub>2</sub> when not in use. Unless otherwise stated, chemicals and reagents were used as received. Triethylamine (Et<sub>3</sub>N) was distilled over calcium hydride prior to use. All reactions were monitored by thin-layer chromatography using EMD/Merck silica gel 60 F254 pre-coated plates (0.25 mm) and were visualized by UV, CAM, or KMnO<sub>4</sub> staining. Flash column chromatography was performed as described by Still et al.<sup>1</sup> using silica gel (partical size 0.032-0.063) purchased from Silicycle. Optical rotations were measured on a Jasco P-2000 polarimeter using a 100 mm path-length cell at 589 nm. <sup>1</sup>H and <sup>13</sup>C NMR spectra were recorded on a Varian Inova 500 (at 500 MHz and 126 MHz, respectively), and are reported relative to internal CHCl<sub>3</sub> (<sup>1</sup>H, δ = 7.26) and CDCl<sub>3</sub> (<sup>13</sup>C, δ = 77.0). Data for <sup>1</sup>H NMR spectra are reported as follows: chemical shift (δ ppm) (multiplicity, coupling constant (Hz), integration). Multiplicity and qualifier abbreviations are as follows: s = singlet, d = doublet, t = triplet, q = quartet, m = multiplet, br = broad, app = apparent. IR spectra were recorded on a Perkin Elmer Paragon 1000 spectrometer and are reported in frequency of absorption (cm<sup>-1</sup>). HRMS were acquired using an Agilent 6200 Series TOF with an Agilent G1978A Multimode source in electrospray ionization (ESI), atmospheric pressure chemical ionization (APCI), or mixed (MM) ionization mode. Analytical SFC was performed with a Mettler SFC supercritical CO<sub>2</sub> analytical chromatography system with Chiralcel AD-H, OD-H, AS-H, OB-H, and OJ-H columns (4.6 mm x 25 cm) with visualization at 254 nm. Analytical achiral GC-MS was performed with an Agilent 7890A GC and an Agilent 5975C VL MSD with triple axis detector utilizing an Agilent HP-5MS (30.0 m x 0.25 mm) column (0.4 mL/min He carrier gas flow). Analytical chiral HPLC was performed with an Agilent 1100 Series HPLC utilizing Chiralpak AD or Chiralcel OD-H columns (4.6 mm x 25 cm) obtained from Daicel Chemical Industries, Ltd with visualization at 254 nm.

**Abbreviations used:** DMA – dimethylacetamide; dme – dimethoxyethane; IPA – isopropanol; ee – enantiomeric excess; dr – diastereomeric ratio; SFC – supercritical fluid chromatography; TDAE – tetrakis(dimethylamino)ethylene

---

<sup>1</sup> Still, W. C.; Kahn, M.; Mitra, A. *J. Org. Chem.* **1978**, *43*, 2923.

## 2. Optimization of Reaction Parameters

### A. General Procedure 1 (Table 1)

On a bench-top, to a 1/2 dram vial was added the appropriate ligand (0.022 mmol, 11 mol %), reductant (0.6 mmol, 3 equiv), NiCl<sub>2</sub>(dme) (0.02 mmol, 10 mol %), vinyl bromide (**1a**, 0.2 mmol, 1.0 equiv), and NaI (0.1 mmol, 0.5 equiv) if necessary. The vial was transferred into an N<sub>2</sub>-filled glovebox and charged with the appropriate solvent (0.2 mL, 1.0 M) followed by benzyl chloride and dodecane (internal standard). The vial was sealed and removed from the glovebox. The mixture was stirred vigorously, ensuring that the reductant was uniformly suspended, at 20 °C for 6 h. The dark mixture was diluted with 10% ethyl acetate/hexane and passed through a plug of silica, using 10% ethyl acetate/hexane eluent. The solution was concentrated to afford a clear oil. The crude residue was analyzed by GC-MS.

Dodecane was used as an internal standard. GC samples were analyzed by flame ionization detection and yields calculated based on a calibrated response factor.

### B. Solvent Screen

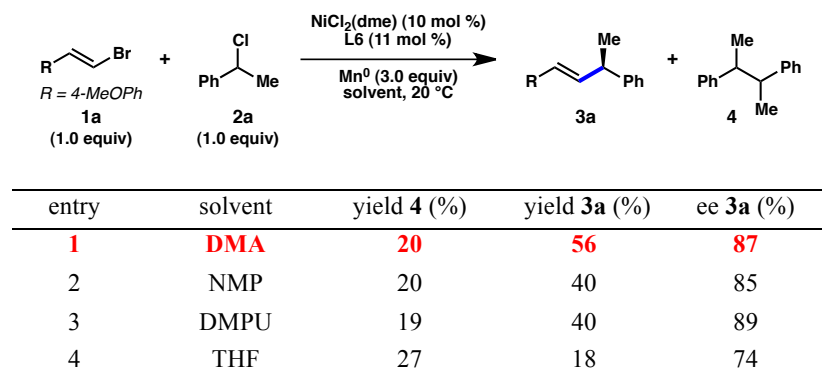



### C. Expanded Ligand Screen

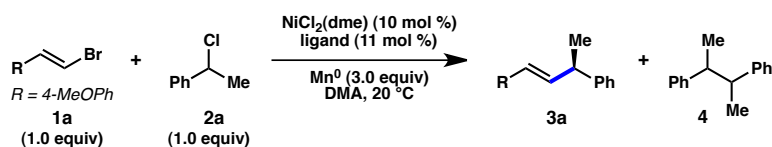

| entry    | solvent   | yield <b>4</b> (%) | yield <b>3a</b> (%) | ee <b>3a</b> (%) |
|----------|-----------|--------------------|---------------------|------------------|
| 1        | L1        | 48                 | 50                  | 40               |
| 2        | L2        | 33                 | 21                  | 57               |
| 3        | L3        | 38                 | 25                  | 68               |
| 4        | L4        | 35                 | 26                  | 70               |
| 5        | L5        | 21                 | 33                  | 49               |
| <b>6</b> | <b>L6</b> | <b>20</b>          | <b>56</b>           | <b>87</b>        |
| 7        | L7        | 26                 | 20                  | 27               |
| 8        | L8        | 21                 | 56                  | 78               |

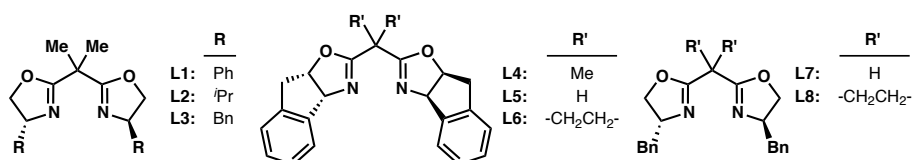

### 3. Additional Substrate Scope

#### a) Z-Vinyl Bromide

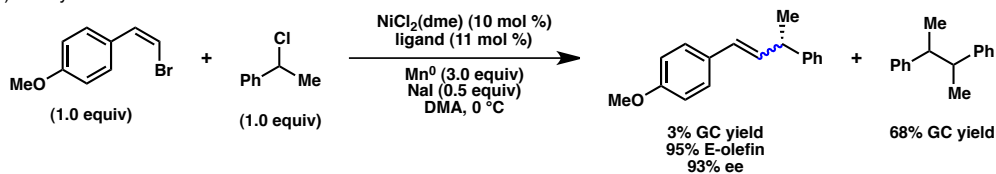

#### b) Trisubstituted Olefin

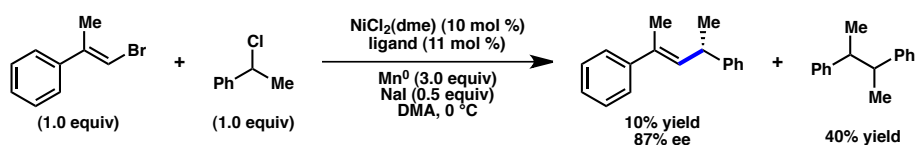

#### c) Challenging Functional Groups

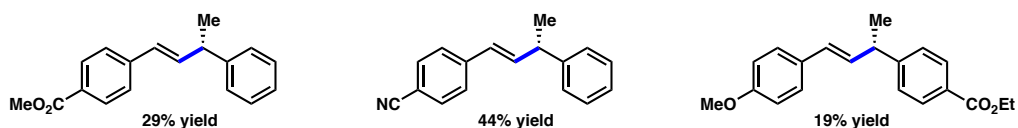

Reactions were run according to General Procedure 5 (see page 14).

#### 4. Ligand Preparation

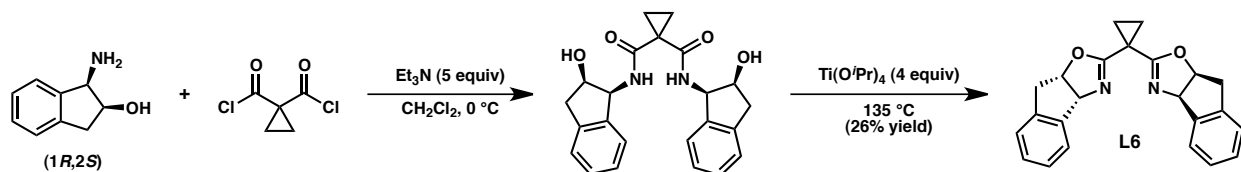

To a flame-dried flask was added (1R,2S)-(+)-*cis*-1-amino-2-indanol (38 mmol, 2.1 equiv) and CH<sub>2</sub>Cl<sub>2</sub> (70 mL). The reaction was cooled to 0 °C and freshly-distilled Et<sub>3</sub>N (90 mmol, 5 equiv) was added dropwise. Cyclopropane-1,1-dicarbonyl dichloride<sup>2</sup> (18 mmol) was added dropwise and the solution was warmed to room temperature and stirred at 23 °C under N<sub>2</sub> for 6 h. A white precipitate slowly formed over the course of the reaction. The mixture was quenched with 1 M HCl and a white precipitate formed. The mixture was filtered and the white solid was collected and washed several times with an excess of water. The bis-amide product was dried under vacuum and used in the next step without any further purification.

According to procedure by Kurosu and coworkers,<sup>3</sup> to a flame-dried flask was added crude bis-amide (3.6 mmol, 1 equiv) and anhydrous Ti(O<sup>i</sup>Pr)<sub>4</sub> (14.4 mmol, 4 equiv). The mixture was equipped with a distillation head and stirred at 135 °C under N<sub>2</sub> for 10 h. The reaction became a brown solution at high temperatures and isopropanol was observed to have been distilled from the solution. The reaction was cooled to 23 °C and 3-(dimethylamino)-1,2-propanediol (4.8 equiv) was added. The reaction was heated with a heat gun until the solution became homogeneous and was then stirred for 30 min. EtOAc (8 mL) and water (8 mL) were added and the reaction was stirred for 1 h. The organic layer was separated and the aqueous layer was extracted with EtOAc. The combined organic layers were dried (Na<sub>2</sub>SO<sub>4</sub>), filtered, and concentrated. The crude residue was purified by flash chromatography (2% methanol/dichloromethane) to isolate a light brown solid. The material was recrystallized from isopropanol to provide a white solid (1.15 g, 26% yield). [α]<sub>D</sub><sup>25</sup> = +274.5° (c = 1.0, CHCl<sub>3</sub>); <sup>1</sup>H NMR (500 MHz, CDCl<sub>3</sub>) δ 7.49 – 7.42 (m, 2H), 7.30 – 7.20 (m, 6H), 5.53 (dd, *J* = 7.9, 0.8 Hz, 2H), 5.34 (ddd, *J* = 7.9, 7.0, 1.9 Hz, 2H), 3.44 – 3.35 (m, 2H), 3.20 (dd, *J* = 17.9, 1.8 Hz, 2H), 1.41 – 1.23 (m, 4H); <sup>13</sup>C NMR (126 MHz, CDCl<sub>3</sub>) δ 165.8, 141.8, 139.7, 128.3, 127.3, 125.6, 125.1, 83.3, 76.4, 39.6, 18.3, 15.7; FTIR (NaCl, thin film): 3246, 3023, 2917, 1654, 1534, 1479, 1459, 1426, 1364, 1302, 1247, 1159, 1115, 1001, 754, 733 cm<sup>-1</sup>; HRMS (MM) calc'd for C<sub>23</sub>H<sub>20</sub>N<sub>2</sub>O<sub>2</sub> [M+Na]<sup>+</sup> 379.1417, found 379.1438.

<sup>2</sup> Ginotra, S. K.; Singh, V. K.; *Org. Biomol. Chem.* **2007**, *5*, 3932.

<sup>3</sup> Kurosu, M.; Porter, J. R.; Foley, M. A. *Tetrahedron Lett.* **2004**, *45*, 145.

## 5. Substrate Preparation

Vinyl bromides **1a**<sup>4</sup> and **1g**<sup>5</sup> and benzyl chloride **2m**<sup>6</sup> and **2n**<sup>7</sup> were prepared according to literature precedent.

### A. General Procedure 2: Vinyl Bromide Synthesis from Benzyl Bromides

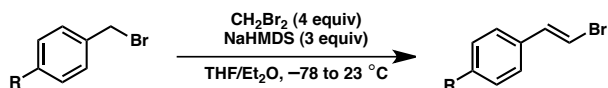

According to a protocol by Charette and coworkers,<sup>8</sup> to a flame-dried flask under N<sub>2</sub> was added NaHMDS (9 mmol, 3 equiv, 1 M in THF) and Et<sub>2</sub>O (6 mL). The flask was cooled to -78 °C and wrapped in aluminum foil. To the solution was added freshly-distilled dibromomethane (12 mmol, 4 equiv) dropwise. The solution was stirred at -78 °C for 20 min and then benzyl bromide in 2 mL THF was added dropwise. The solution was stirred at -78 °C for an additional 3 h and then slowly warmed to room temperature and stirred in the dark at 23 °C for 21 h. The mixture was filtered through a pad of celite and silica and concentrated. The crude material was purified by flash chromatography.

#### (E)-1-(2-bromovinyl)-4-fluorobenzene (**1b**)

Fc1ccc(C=CCBr)cc1 Prepared from 1-(bromomethyl)-4-(fluoromethyl)benzene (3.0 mmol) according to General Procedure 2. The crude residue was purified by silica gel chromatography (hexanes) to yield **1b** (419.2 mg, 70% yield) as a white solid. Spectral data matched those reported in the literature.

#### (E)-1-(2-bromovinyl)-4-chlorobenzene (**1c**)

Clc1ccc(C=CCBr)cc1 Prepared from 1-(bromomethyl)-4-(chloromethyl)benzene (3.0 mmol) according to General Procedure 2. The crude residue was purified by silica gel chromatography (hexanes) to yield **1c** (496.2 mg, 76% yield) as a white solid. Spectral data matched those reported in the literature.

#### (E)-1-(2-bromovinyl)-4-(trifluoromethyl)benzene (**1d**)

C(F)(F)Fc1ccc(C=CCBr)cc1 Prepared from 1-(bromomethyl)-4-(trifluoromethyl)benzene (3.0 mmol) according to General Procedure 2. The crude residue was purified by silica gel chromatography (1 to 2% ethyl

<sup>4</sup> Robiette, R.; Pospíšil, J. *Eur. J. Org. Chem.* **2013**, 836.

<sup>5</sup> Akiyama, S.; Nakatsuji, S.; Yoshida, K.; Nakashima, K.; Hagiwara, T.; Tsuruta, H.; Yoshida, T. *Bull. Chem. Soc. Jpn.* **1983**, *56*, 361.

<sup>6</sup> Yoshida, K.; Horikoshi, Y.; Eta, M.; Chikazawa, J.; Ogishima, M.; Fukuda, Y.; Sato, H. *Bioorg. Med. Chem. Lett.* **1998**, *8*, 2967.

<sup>7</sup> Ayala, C. E.; Villalpando, A.; Nguyen, A. L.; McCandless, G. T.; Kartika, R. *Org. Lett.* **2012**, *14*, 3676.

<sup>8</sup> Bull, J. A.; Mousseau, J. J.; Charette, A. B. *Org. Lett.* **2008**, *10*, 5485.

acetate/hexanes) to yield **1d** (138.4 mg, 18% yield) as a clear oil. <sup>1</sup>H NMR (500 MHz, CDCl<sub>3</sub>) δ 7.60 (d, *J* = 7.7 Hz, 2H), 7.41 (d, *J* = 8.1 Hz, 2H), 7.15 (d, *J* = 14.1 Hz, 1H), 6.92 (d, *J* = 14.0 Hz, 1H); <sup>13</sup>C NMR (126 MHz, CDCl<sub>3</sub>) δ 139.2, 135.9, 130.1 (q, *J* = 33 Hz), 126.3, 125.8 (q, *J* = 4 Hz), 124.0 (q, *J* = 276 Hz), 109.4; FTIR (NaCl, thin film): 3074, 1617, 1604, 1574, 1411, 1326, 1166, 1127, 1068, 1017, 935, 848, 785, 739, 724 cm<sup>-1</sup>; HRMS (MM) calc'd for C<sub>9</sub>H<sub>6</sub>BrF<sub>3</sub> [M]<sup>+</sup> 249.9605, found 249.9569.

### B. General Procedure 3: Vinyl Bromide Synthesis from Aldehydes

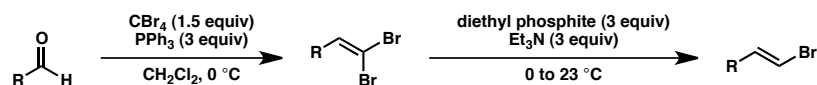

According to a modified synthetic sequence by Alexakis and coworkers,<sup>9</sup> to a flame-dried flask under N<sub>2</sub> was added aldehyde (10 mmol, 1 equiv), CBr<sub>4</sub> (15 mmol, 3 equiv), and CH<sub>2</sub>Cl<sub>2</sub> (80 mL). The flask was cooled to 0 °C. A solution of PPh<sub>3</sub> in CH<sub>2</sub>Cl<sub>2</sub> (70 mL) was added to the reaction dropwise via addition funnel over 30 min. The solution was stirred at 0 °C under N<sub>2</sub> for 1 h. The solution was concentrated to remove CH<sub>2</sub>Cl<sub>2</sub> and CHCl<sub>3</sub> was added. The resulting mixture was filtered and washed with CHCl<sub>3</sub> (2 x 20 mL). The filtrate was concentrated to give a thick orange oil. The crude material was purified by flash chromatography to isolate the dibromoalkene.

To a vial containing dibromoalkene was added diethyl phosphite (3 equiv). Additional DMF was added to dissolve solid substrates. The solution was cooled to 0 °C and Et<sub>3</sub>N (3 equiv) was added dropwise. The reaction was warmed to 23 °C and stirred overnight. The mixture was diluted with water. The aqueous layer was extracted with CH<sub>2</sub>Cl<sub>2</sub> and the combined organic layers were washed with brine and dried (Na<sub>2</sub>SO<sub>4</sub>), filtered, and concentrated. The crude material was purified by flash chromatography.

#### (*E*)-1-(2-bromovinyl)-4-(trifluoromethoxy)benzene (**1e**)

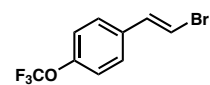 Prepared from 4-(trifluoromethoxy)benzaldehyde (10.0 mmol) according to General Procedure 3. The crude residue was purified by silica gel chromatography (hexanes) to yield **1e** (2.07 g, 72% yield, 94% *E* olefin) as a pale yellow oil. <sup>1</sup>H NMR (500 MHz, CDCl<sub>3</sub>) δ 7.38 – 7.24 (m, 2H), 7.24 – 7.16 (m, 2H), 7.10 (d, *J* = 14.0 Hz, 1H), 6.79 (d, *J* = 14.0 Hz, 1H); <sup>13</sup>C NMR (126 MHz, CDCl<sub>3</sub>) δ 148.9 (q, *J* = 2 Hz), 135.7, 134.6, 127.4, 121.2, 120.40 (q, *J* = 257 Hz), 107.5; FTIR (NaCl, thin film): 3073, 2430, 1895, 1607, 1507, 1411, 1261, 1215, 1162, 1104, 1017, 948, 931, 841, 778, 745, 713 cm<sup>-1</sup>; HRMS (MM) calc'd for C<sub>9</sub>H<sub>6</sub>BrF<sub>3</sub>O [M+H<sub>3</sub>O]<sup>+</sup> 284.9733, found 284.9819.

According to Alexakis and coworkers,<sup>9</sup> to a vial containing vinyl bromide **1e** (6 mmol) was added NaOH (0.85 equiv) and IPA (0.5 M). The mixture was stirred at 75 °C for 2 h. The reaction was cooled to room

<sup>9</sup> Müller, D.; Alexakis, A. *Chem. Eur. J.* **2013**, *19*, 15226.

temperature and diluted with pentane and water. The organic layer was washed with water and 1 M HCl. The organic layer was then dried (Na<sub>2</sub>SO<sub>4</sub>), filtered, and concentrated to isolate geometrically pure product (1.44 g, 82% yield).

#### (*E*)-4-(2-bromovinyl)phenoxy(*tert*-butyl)dimethylsilane (**1f**)

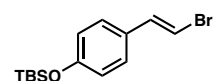

Prepared from 4-((*tert*-butyldimethylsilyl)oxy)benzaldehyde (18.0 mmol) according to General Procedure 3. The crude residue was purified by silica gel chromatography (hexanes) to yield **1f** (3.66 g, 66% yield, 88% *E* olefin) as a pale yellow oil. Spectral data matched those reported in the literature.

#### (*E*)-1-(2-bromovinyl)-2,3-dimethylbenzene (**1h**)

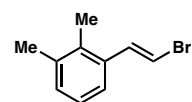

Prepared from 2,3-dimethylbenzaldehyde (10.0 mmol) according to General Procedure 3. The crude residue was purified by silica gel chromatography (hexanes) to yield **1h** (1.73 g, 82% yield, 88% *E* olefin) as a clear oil. <sup>1</sup>H NMR (500 MHz, CDCl<sub>3</sub>) δ 7.47 – 7.37 (m, 1H), 7.23 – 7.05 (m, 3H), 6.64 – 6.57 (m, 1H), 2.35 (s, 3H), 2.28 (s, 3H); <sup>13</sup>C NMR (126 MHz, CDCl<sub>3</sub>) δ 137.1, 136.5, 135.5, 133.8, 130.0, 125.8, 124.3, 107.2, 20.6, 15.6; FTIR (NaCl, thin film): 3068, 2942, 2864, 1725, 1607, 1587, 1456, 1383, 1248, 1203, 1181, 1168, 1092, 938, 784, 757, 707, 668 cm<sup>-1</sup>; HRMS (MM) calc'd for C<sub>18</sub>H<sub>18</sub>O [M]<sup>+</sup> 210.0044, found 209.9930.

According to Alexakis and coworkers,<sup>9</sup> to a vial containing vinyl bromide **1h** (6 mmol) was added NaOH (0.85 equiv) and IPA (0.5 M). The mixture was stirred at 75 °C for 2 h. The reaction was cooled to room temperature and diluted with pentane and water. The organic layer was washed with water and 1 M HCl. The organic layer was then dried (Na<sub>2</sub>SO<sub>4</sub>), filtered, and concentrated to isolate geometrically pure product (1.03 g, 81% yield).

#### (*E*)-4-(2-bromovinyl)-1,2-dimethoxybenzene (**1i**)

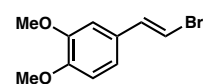

Prepared from 3,4-dimethoxybenzaldehyde (10.0 mmol) according to General Procedure 3. The crude residue was purified by silica gel chromatography (0 to 5% ethyl acetate/hexanes) to yield **1i** (2.02 g, 83% yield, 93% *E* olefin) as a white solid. Spectral data matched those reported in the literature.

According to Alexakis and coworkers,<sup>9</sup> to a vial containing vinyl bromide **1i** (6 mmol) was added NaOH (0.85 equiv) and IPA (0.5 M). The mixture was stirred at 75 °C for 2 h. The reaction was cooled to room temperature and diluted with Et<sub>2</sub>O and water. The organic layer was washed with water and 1 M HCl. The organic

layer was then dried (Na<sub>2</sub>SO<sub>4</sub>), filtered, and concentrated to isolate geometrically pure product (1.35 g, 92% yield).

#### (*E*)-2-(4-(2-bromovinyl)phenyl)-4,4,5,5-tetramethyl-1,3,2-dioxaborolane (**1j**)

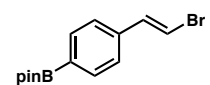 Prepared from 4-(4,4,5,5-tetramethyl-1,3,2-dioxaborolan-2-yl)benzaldehyde (12.5 mmol) according to General Procedure 3. The crude residue was purified by silica gel chromatography (10 to 20% ethyl acetate/hexanes) to yield **1j** (2.55 g, 68% yield) as a low melting solid. <sup>1</sup>H NMR (500 MHz, CDCl<sub>3</sub>) δ 7.78 (d, *J* = 7.7 Hz, 2H), 7.31 (d, *J* = 8.1 Hz, 2H), 7.12 (d, *J* = 14.5 Hz, 1H), 6.86 (d, *J* = 14.4 Hz, 1H), 1.36 (s, 12H); <sup>13</sup>C NMR (126 MHz, CDCl<sub>3</sub>) δ 138.4, 137.2, 135.2, 125.4, 107.7, 83.9, 24.9; FTIR (NaCl, thin film): 3073, 2978, 2931, 1729, 1607, 1516, 1468, 1401, 1361, 1324, 1269, 1214, 1144, 1090, 1019, 962, 937, 860, 782, 745, 727, 653 cm<sup>-1</sup>; HRMS (MM) calc'd for C<sub>14</sub>H<sub>18</sub>BBrO<sub>2</sub> [M+H]<sup>+</sup> 334.2213, found 334.2030.

#### (*E*)-4-(2-bromovinyl)phenol (**1k**)

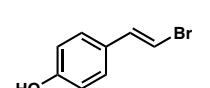 To a vial containing vinyl bromide **1f** (6 mmol, obtained from General Procedure 3) was added NaOH (0.85 equiv) and <sup>i</sup>PrOH. The mixture was stirred at 75 °C for 2 h. The reaction was cooled to room temperature and diluted with Et<sub>2</sub>O and water. The organic layer was washed with water (2x) and 1 M HCl (2x). The organic layer was then dried (MgSO<sub>4</sub>), filtered, and concentrated. The crude residue was purified by flash chromatography (10 to 20% ethyl acetate/hexanes) to yield **1k** (750.0 mg, 63% yield, 92% *E* olefin) as a white solid. Spectral data for **1k** matched that reported in the literature.

#### (*E*)-2-(2-bromovinyl)furan (**1l**)

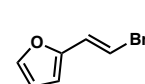 Prepared from furfural (10.0 mmol) according to General Procedure 3. The crude residue was purified by silica gel chromatography (hexanes) to yield **1l** (745 mg, 49% yield, 71% *E* olefin) as a yellow oil. Spectral data matched those reported in the literature.

According to Alexakis and coworkers,<sup>9</sup> to a vial containing vinyl bromide **1l** (6 mmol) was added NaOH (0.85 equiv) and IPA (0.5 M). The mixture was stirred at 75 °C for 1 h. The reaction was cooled to room temperature and diluted with pentane and water. The organic layer was washed with water and 1 M HCl. The organic layer was then dried (Na<sub>2</sub>SO<sub>4</sub>), filtered, and concentrated to isolate geometrically pure product (54 mg, 8% yield).

### **((1E,3E)-4-bromobuta-1,3-dien-1-yl)benzene (1m)**

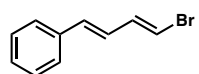

Prepared from cinnamaldehyde (10.0 mmol) according to General Procedure 3. The crude residue was purified by silica gel chromatography (hexanes) to yield **1m** (910 mg, 44% yield, 73% E olefin) as a white solid. Spectral data matched those reported in the literature.

According to Alexakis and coworkers,<sup>9</sup> to a vial containing vinyl bromide **1m** (4.3 mmol) was added NaOH (0.85 equiv) and IPA (0.5 M). The mixture was stirred at 75 °C for 1 h. The reaction was cooled to room temperature and diluted with pentane and water. The organic layer was washed with water and 1 M HCl. The organic layer was then dried (Na<sub>2</sub>SO<sub>4</sub>), filtered, and concentrated to isolate geometrically pure product (584 mg, 66% yield).

### **(E)-(2-bromovinyl)cyclohexane (1n)**

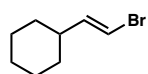

Prepared from cyclohexanecarboxaldehyde (10.0 mmol) according to General Procedure 3, except the debromination was performed at 80 °C for 12 h. The crude residue was purified by silica gel chromatography (hexanes) to yield **1n** (800 mg, 43% yield, 72% E olefin) as a clear oil. Spectral data matched those reported in the literature.

According to Alexakis and coworkers,<sup>9</sup> to a vial containing vinyl bromide **1n** (3.7 mmol) was added NaOH (0.85 equiv) and IPA (0.5 M). The mixture was stirred at 75 °C for 1 h. The reaction was cooled to room temperature and diluted with pentane and water. The organic layer was washed with water and 1 M HCl. The organic layer was then dried (Na<sub>2</sub>SO<sub>4</sub>), filtered, and concentrated to isolate geometrically pure product (480 mg, 61% yield).

### **(E)-4-bromobut-3-en-1-ol (1p)**

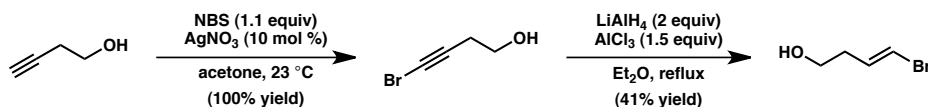

According to a procedure by Hofmeister and coworkers,<sup>10</sup> 3-butyn-1-ol (1 equiv, 15 mmol) was dissolved in acetone (50 mL). To the solution was added NBS (16.5 mmol, 1.1 equiv) and AgNO<sub>3</sub> (1.5 mmol, 10 mol %). The reaction was stirred at 23 °C for 2 h. The reaction was concentrated and diluted with Et<sub>2</sub>O and water. The aqueous layer was extracted with Et<sub>2</sub>O and the combined organic layers were dried (MgSO<sub>4</sub>), filtered, and concentrated to give a clear oil (2.22 g, 100% yield).

<sup>10</sup> Hofmeister, H.; Annen, K.; Laurent, H.; Wiechert, R. *Angew. Chem., Int. Ed.* **1984**, *23*, 727.

To a flame-dried flask was added LiAlH<sub>4</sub> (30 mmol, 2 equiv) and Et<sub>2</sub>O (90 mL). The flask was equipped with a reflux condenser and cooled to -5 °C. AlCl<sub>3</sub> (22.5 mmol, 1.5 equiv) was carefully added to the reaction. The reaction was stirred for 10 min at -5 °C under N<sub>2</sub>. Bromoalkyne (15 mmol, 1 equiv) was added dropwise and the reaction was stirred at reflux under N<sub>2</sub> for 2.5 h. The reaction was cooled to 0 °C and Et<sub>2</sub>O (60 mL) was added, followed by 2 M HCl (60 mL) dropwise to quench the reaction. The aqueous layer was extracted with Et<sub>2</sub>O (3 x 40 mL) and the combined organic layers were washed with brine, dried (MgSO<sub>4</sub>), filtered, and concentrated. The crude material was purified by flash chromatography (15 to 30% ethyl acetate/hexanes) to isolate a clear oil (917.6 mg, 41% yield). <sup>1</sup>H NMR (500 MHz, CDCl<sub>3</sub>) δ 6.28 – 6.04 (m, 2H), 3.75 – 3.52 (m, 2H), 2.44 (s, 1H), 2.36 – 2.18 (m, 2H); <sup>13</sup>C NMR (126 MHz, CDCl<sub>3</sub>) δ 134.3, 106.6, 61.1, 36.1; FTIR (NaCl, thin film): 3338, 3065, 2935, 2880, 1622, 1427, 1227, 1168, 1046, 1002, 937, 710 cm<sup>-1</sup>; HRMS (MM) calc'd for C<sub>4</sub>H<sub>7</sub>BrO [M+OH]<sup>+</sup> 166.9702, found 166.9662.

#### (E)-4-bromobut-3-en-1-yl benzoate (1o)

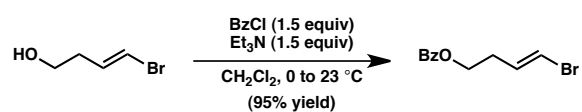

To a flame-dried flask was added alcohol **1p** (1.5 mmol, 1 equiv,) and CH<sub>2</sub>Cl<sub>2</sub> (5 mL). The solution was cooled to 0 °C and Et<sub>3</sub>N (2.25 mmol, 1.5 equiv) and BzCl (2.25 mmol, 1.5 equiv) were added. The solution was stirred at 23 °C under N<sub>2</sub> for 3 h. The reaction was quenched with sat. aqueous NH<sub>4</sub>Cl and the aqueous layer was extracted with Et<sub>2</sub>O. The combined organic layers were washed with brine, dried (MgSO<sub>4</sub>), filtered, and concentrated. The crude oil was purified by flash chromatography (1% ethyl acetate/hexanes) to isolate a clear oil (363.8 mg, 95% yield). <sup>1</sup>H NMR (500 MHz, CDCl<sub>3</sub>) δ 8.09 – 8.01 (m, 2H), 7.61 – 7.53 (m, 1H), 7.45 (td, *J* = 7.7, 1.6 Hz, 2H), 6.32 – 6.18 (m, 2H), 4.36 (td, *J* = 6.6, 1.8 Hz, 2H), 2.52 (qd, *J* = 6.6, 2.2 Hz, 2H); <sup>13</sup>C NMR (126 MHz, CDCl<sub>3</sub>) δ 166.3, 133.4, 133.1, 130.0, 129.6, 128.4, 107.1, 63.1, 32.4; FTIR (NaCl, thin film): 3064, 2957, 2898, 1717, 1622, 1602, 1492, 1451, 1382, 1314, 1273, 1176, 1116, 1070, 1026, 937, 710 cm<sup>-1</sup>; HRMS (ESI) calc'd for C<sub>11</sub>H<sub>11</sub>BrO<sub>2</sub> [M+H]<sup>+</sup> 255.0015, found 254.9994.

#### C. General Procedure 4: Benzyl Chloride Synthesis

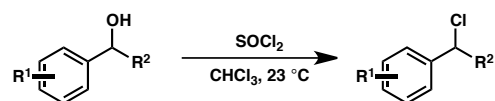

A flask was charged with the appropriate benzyl alcohol (1.0 equiv) and CHCl<sub>3</sub> (1.5 M). Thionyl chloride (1.05 equiv) was added dropwise. Evolved gas was quenched via cannula by aqueous NaHCO<sub>3</sub>. The solution was stirred at 23 °C for 12 h and then concentrated to afford a yellow oil. The crude residue was purified by Kugelrohr



distillation to isolate **2a–l**, **2o**, and **2p** as clear oils. Spectral data for all compounds matched those reported in the literature.

#### D. Preparation of Radical Clock Substrate **6**

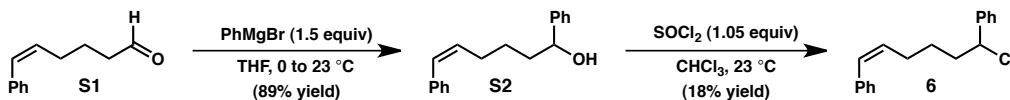

Aldehyde **S1** was prepared according to a known procedure from 5-hexyn-1-ol.<sup>11</sup> To a flame-dried flask was added PhMgBr (16 mmol, 1.5 equiv, 3 M in Et<sub>2</sub>O) and THF (33 mL). The solution was cooled to 0 °C and aldehyde **S1** was added dropwise. The solution was slowly warmed to 23 °C and stirred under N<sub>2</sub> overnight. The reaction was quenched with sat. aqueous NH<sub>4</sub>Cl and H<sub>2</sub>O. The aqueous layer was extracted with Et<sub>2</sub>O. The combined organic layers were washed with brine and dried (MgSO<sub>4</sub>), filtered, and concentrated. The crude residue was purified by flash chromatography (10% ethyl acetate/hexanes) to isolate **S2** as a pale yellow oil (2.37 g, 89% yield). <sup>1</sup>H NMR (500 MHz, CDCl<sub>3</sub>) δ 7.49 – 7.11 (m, 10H), 6.46 (d, *J* = 11.4 Hz, 1H), 5.67 (dt, *J* = 11.7, 7.2 Hz, 1H), 4.66 (dd, *J* = 7.5, 5.8 Hz, 1H), 2.52 – 2.28 (m, 2H), 2.12 – 1.93 (m, 1H), 1.93 – 1.68 (m, 2H), 1.68 – 1.36 (m, 2H); <sup>13</sup>C NMR (126 MHz, CDCl<sub>3</sub>) δ 144.7, 137.7, 132.6, 129.2, 128.8, 128.5, 128.2, 127.6, 126.5, 125.9, 74.5, 38.6, 28.4, 26.1; FTIR (NaCl, thin film): 3546, 3350, 3058, 3024, 2935, 2856, 1948, 1880, 1807, 1757, 1599, 1574, 1493, 1453, 1406, 1319, 1269, 1200, 1156, 1069, 1028, 1001, 914, 764, 699; HRMS (MM) calc'd for C<sub>18</sub>H<sub>20</sub>O [M]<sup>+</sup> 252.1514, found 252.1520.

A flask was charged with the **S2** ( 5.2 mmol, 1.0 equiv) and CHCl<sub>3</sub> (1.5 M). Thionyl chloride (5.5 mmol, 1.05 equiv) was added dropwise. Evolved gas was quenched via cannula by aqueous NaHCO<sub>3</sub>. The solution was stirred at 23 °C for 12 h and then concentrated to afford a yellow oil. The crude residue was purified by flash chromatography (hexanes) to isolate **7** as a clear oil (250.9 mg, 18% yield). <sup>1</sup>H NMR (500 MHz, CDCl<sub>3</sub>) δ 7.48 – 7.09 (m, 10H), 6.46 (d, *J* = 11.8 Hz, 1H), 5.63 (dt, *J* = 11.6, 7.2 Hz, 1H), 4.83 (dd, *J* = 8.2, 6.4 Hz, 1H), 2.39 (qd, *J* = 7.4, 1.9 Hz, 2H), 2.25 – 1.97 (m, 2H), 1.80 – 1.34 (m, 2H); <sup>13</sup>C NMR (126 MHz, CDCl<sub>3</sub>) δ 141.7, 137.5, 132.0, 129.5, 128.7, 128.6, 128.24, 128.17, 126.9, 126.6, 63.5, 39.4, 27.8, 27.3; FTIR (NaCl, thin film): 3057, 3024, 2943, 2860, 1599, 1493, 1454, 1235, 1075, 1028, 914, 766, 752, 697 cm<sup>-1</sup>; HRMS (MM) calc'd for C<sub>18</sub>H<sub>19</sub>Cl [M+H<sub>3</sub>O]<sup>+</sup> 289.1354, found 289.1340.

<sup>11</sup> Petrignet, J.; Boudhar, A.; Blond, G.; Suffert, J. *Angew. Chem., Int. Ed.* **2011**, *50*, 3285.

## 6. Enantioselective Reductive Cross-Coupling

### General Procedure 5: Enantioselective Reductive Coupling of Benzyl Chlorides and Vinyl Bromides

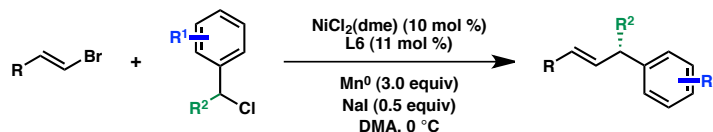

On a bench-top, to a 10 mL round-bottom flask was added **L6** (0.022 mmol, 11 mol),  $\text{Mn}^0$  (0.6 mmol, 3 equiv),  $\text{NiCl}_2(\text{dme})$  (0.02 mmol, 10 mol %), vinyl bromide **1** (if a solid, 0.2 mmol, 1 equiv), and  $\text{NaI}$  (0.1 mmol, 0.5 equiv). The flask was covered with a rubber septum, purged with  $\text{N}_2$ , and cooled to 0 °C. To the mixture was added DMA (0.2 mL), vinyl bromide **1** (if an oil, 0.2 mmol, 1 equiv), and benzyl chloride **2** (0.2 mmol, 1 equiv). The mixture was stirred vigorously, ensuring that the manganese powder was uniformly suspended. After 6 h, the mixture was allowed to warm to room temperature and was quenched with 1 M  $\text{HCl}$  (0.5 mL). The mixture was transferred to a separatory funnel using water (5 mL) and  $\text{Et}_2\text{O}$  (10 mL), and the aqueous and organic layers were separated. The aqueous layer was extracted with  $\text{Et}_2\text{O}$  (2 x 10 mL) and the combined organic layers were washed with brine (1 x 5 mL) and dried ( $\text{MgSO}_4$ ), filtered, and concentrated. The crude residue was purified by flash chromatography.

### General Procedure 6: Enantioselective Reductive Coupling of Benzyl Chlorides and Vinyl Bromides – 15% Catalyst Loading

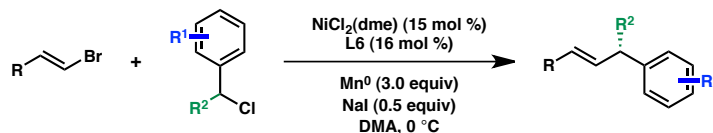

On a bench-top, to a 10 mL round-bottom flask was added **L6** (0.032 mmol, 16 mol %),  $\text{Mn}^0$  (0.6 mmol, 3 equiv),  $\text{NiCl}_2(\text{dme})$  (0.03 mmol, 15 mol %), vinyl bromide **1** (if a solid, 0.2 mmol, 1 equiv), and  $\text{NaI}$  (0.1 mmol, 0.5 equiv). The flask was covered with a rubber septum, purged with  $\text{N}_2$ , and cooled to 0 °C. To the mixture was added DMA (0.2 mL), vinyl bromide **1** (if an oil, 0.2 mmol, 1 equiv), and benzyl chloride **2** (0.2 mmol, 1 equiv). The mixture was stirred vigorously, ensuring that the manganese powder was uniformly suspended. After 6 h, the mixture was allowed to warm to room temperature and was quenched with 1 M  $\text{HCl}$  (0.5 mL). The mixture was transferred to a separatory funnel using water (5 mL) and  $\text{Et}_2\text{O}$  (10 mL), and the aqueous and organic layers were separated. The aqueous layer was extracted with  $\text{Et}_2\text{O}$  (2 x 10 mL) and the combined organic layers were washed with brine (1 x 5 mL) and dried ( $\text{MgSO}_4$ ), filtered, and concentrated. The crude residue was purified by flash chromatography.

### **(*S,E*)-1-methoxy-4-(3-phenylbut-1-en-1-yl)benzene (3a)**

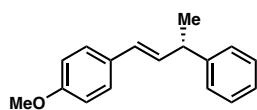

Prepared from (1-chloroethyl)benzene (**2a**, 0.2 mmol) and (*E*)-1-(2-bromovinyl)-4-methoxybenzene (**1a**, 0.2 mmol) according to General Procedure 5. The crude residue was purified by silica gel chromatography (5 to 15% toluene/hexanes) to yield **3a** (43.4 mg, 91% yield) in 93% ee as a clear oil. The enantiomeric excess was determined by chiral SFC analysis (OB-H, 2.5 mL/min, 20% IPA in CO<sub>2</sub>, λ = 254 nm): *t*<sub>R</sub> (major) = 7.6 min, *t*<sub>R</sub> (minor) = 9.2 min. [α]<sub>D</sub><sup>25</sup> = -41.9° (c = 1.0, CHCl<sub>3</sub>); <sup>1</sup>H NMR (500 MHz, CDCl<sub>3</sub>) δ 7.39 – 7.20 (m, 7H), 6.90 – 6.83 (m, 2H), 6.40 (d, *J* = 16.2 Hz, 1H), 6.28 (dd, *J* = 15.9, 6.7 Hz, 1H), 3.82 (s, 3H), 3.70 – 3.60 (m, 1H), 1.49 (d, *J* = 7.0 Hz, 3H); <sup>13</sup>C NMR (126 MHz, CDCl<sub>3</sub>) δ 158.9, 145.9, 133.2, 130.5, 128.4, 128.0, 127.3, 127.2, 126.1, 114.0, 55.3, 42.5, 21.3; FTIR (NaCl, thin film): 3026, 2962, 2834, 1607, 1577, 1511, 1492, 1452, 1298, 1251, 1174, 1034, 967, 818, 760 cm<sup>-1</sup>; HRMS (MM) calc'd for C<sub>17</sub>H<sub>20</sub>O [M]<sup>+</sup> 238.1358, found 238.1346.

The optical rotation of the product generated in the presence of (*R,R,S,S*)-**L6** was measured as [α]<sub>D</sub><sup>25</sup> = -41.9° (c = 1.0, CHCl<sub>3</sub>). Lit: [α]<sub>D</sub><sup>20</sup> = -16° (c = 1.28, CHCl<sub>3</sub>, *S* enantiomer, 94% ee).<sup>12</sup> Based on the literature precedent, we assign our product as the *S* enantiomer.

### **(*S,E*)-1-methoxy-4-(3-(*p*-tolyl)but-1-en-1-yl)benzene (3b)**

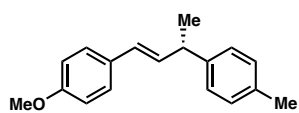

Prepared from 1-(1-chloroethyl)-4-methylbenzene (**2b**, 0.2 mmol) and (*E*)-1-(2-bromovinyl)-4-methoxybenzene (**1a**, 0.2 mmol) according to General Procedure 5.

The crude residue was purified by silica gel chromatography (5 to 15% toluene/hexanes) to yield **3b** (41.4 mg, 82% yield) in 94% ee as a clear oil. The enantiomeric excess was determined by chiral SFC analysis (OB-H, 2.5 mL/min, 15% IPA in CO<sub>2</sub>, λ = 254 nm): *t*<sub>R</sub> (major) = 11.4 min, *t*<sub>R</sub> (minor) = 13.0 min. [α]<sub>D</sub><sup>25</sup> = -41.1° (c = 1.1, CHCl<sub>3</sub>); <sup>1</sup>H NMR (500 MHz, CDCl<sub>3</sub>) δ 7.35 – 7.28 (m, 2H), 7.23 – 7.13 (m, 4H), 6.90 – 6.83 (m, 2H), 6.39 (d, *J* = 16.2 Hz, 1H), 6.27 (dd, *J* = 15.9, 6.7 Hz, 1H), 3.82 (s, 3H), 3.66 – 3.58 (m, 1H), 2.37 (s, 3H), 1.47 (d, *J* = 7.0 Hz, 3H); <sup>13</sup>C NMR (126 MHz, CDCl<sub>3</sub>) δ 158.8, 142.9, 135.6, 133.4, 130.5, 129.2, 127.7, 127.23, 127.18, 113.9, 55.3, 42.1, 21.4, 21.0; FTIR (NaCl, thin film): 3019, 2961, 2929, 2834, 1607, 1577, 1511, 1454, 1298, 1273, 1250, 1174, 1036, 967, 814 cm<sup>-1</sup>; HRMS (MM) calc'd for C<sub>18</sub>H<sub>20</sub>O [M]<sup>+</sup> 252.1514, found 252.1477.

<sup>12</sup> Wu, H.-B.; Ma, X.-T.; Tian, S.-K. *Chem. Commun.* **2014**, 50, 219.

### (*S,E*)-1-(4-(4-methoxyphenyl)but-3-en-2-yl)-3-methylbenzene (**3c**)

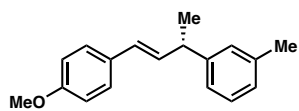

Prepared from 1-(1-chloroethyl)-3-methylbenzene (**2c**, 0.2 mmol) and (*E*)-1-(2-bromovinyl)-4-methoxybenzene (**1a**, 0.2 mmol) according to General Procedure 5.

The crude residue was purified by silica gel chromatography (0 to 2% Et<sub>2</sub>O/hexanes) to yield **3c** (44.6 mg, 88% yield) in 93% ee as a clear oil. The enantiomeric excess was determined by chiral SFC analysis (OB-H, 2.5 mL/min, 15% IPA in CO<sub>2</sub>, λ = 254 nm): *t<sub>R</sub>* (major) = 7.1 min, *t<sub>R</sub>* (minor) = 8.9 min. [α]<sub>D</sub><sup>25</sup> = -40.5° (c = 1.0, CHCl<sub>3</sub>); <sup>1</sup>H NMR (500 MHz, CDCl<sub>3</sub>) δ 7.36 – 7.28 (m, 2H), 7.29 – 7.19 (m, 1H), 7.15 – 7.01 (m, 3H), 6.88 – 6.83 (m, 2H), 6.40 (d, *J* = 16.0 Hz, 1H), 6.28 (dd, *J* = 15.9, 6.8 Hz, 1H), 3.83 (s, 3H), 3.66 – 3.57 (m, 1H), 2.38 (s, 3H), 1.48 (d, *J* = 7.0 Hz, 3H); <sup>13</sup>C NMR (126 MHz, CDCl<sub>3</sub>) δ 158.8, 145.9, 138.0, 133.3, 130.5, 128.3, 128.1, 127.8, 127.2, 126.9, 124.3, 113.9, 55.3, 42.5, 21.5, 21.4; FTIR (NaCl, thin film): 3029, 2962, 2834, 1607, 1577, 1511, 1488, 1463, 1371, 1299, 1251, 1175, 1107, 1036, 967, 848, 817, 785, 767 cm<sup>-1</sup>; HRMS (MM) calc'd for C<sub>18</sub>H<sub>20</sub>O [M]<sup>+</sup> 252.1514, found 252.1443.

### (*S,E*)-1-(4-(4-methoxyphenyl)but-3-en-2-yl)-2-methylbenzene (**3d**)

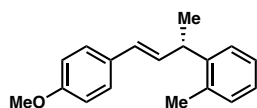

Prepared from 1-(1-chloroethyl)-2-methylbenzene (**2d**, 0.2 mmol) and (*E*)-1-(2-bromovinyl)-4-methoxybenzene (**1a**, 0.2 mmol) according to General Procedure 6. The crude residue was purified by silica gel chromatography (5 to 15% toluene/hexanes) to

yield **3d** (22.3 mg, 44% yield) in 85% ee as a clear oil. The enantiomeric excess was determined by chiral SFC analysis (OB-H, 2.5 mL/min, 15% IPA in CO<sub>2</sub>, λ = 254 nm): *t<sub>R</sub>* (major) = 8.7 min, *t<sub>R</sub>* (minor) = 10.4 min. [α]<sub>D</sub><sup>25</sup> = -40.3° (c = 0.9, CHCl<sub>3</sub>); <sup>1</sup>H NMR (500 MHz, CDCl<sub>3</sub>) δ 7.33 – 7.09 (m, 6H), 6.87 – 6.80 (m, 2H), 6.32 (d, *J* = 15.7 Hz, 1H), 6.23 (dd, *J* = 16.0, 6.2 Hz, 1H), 3.89 – 3.82 (m, 1H), 3.81 (s, 3H), 2.39 (s, 3H), 1.45 (d, *J* = 7.0 Hz, 3H); <sup>13</sup>C NMR (126 MHz, CDCl<sub>3</sub>) δ 158.8, 143.8, 135.6, 132.7, 130.42, 130.36, 127.8, 127.2, 126.3, 126.2, 126.0, 113.9, 55.3, 38.0, 20.6, 19.5; FTIR (NaCl, thin film): 3017, 2962, 2929, 2834, 1607, 1576, 1511, 1488, 1462, 1297, 1250, 1174, 1106, 1035, 968, 818, 758, 729 cm<sup>-1</sup>; HRMS (MM) calc'd for C<sub>18</sub>H<sub>20</sub>O [M]<sup>+</sup> 252.1514, found 252.1673.

### (*S,E*)-4,4'-(but-1-ene-1,3-diyl)bis(methoxybenzene) (**3e**)

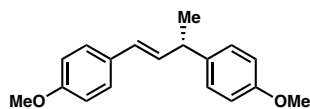

Prepared from 1-(1-chloroethyl)-4-methoxybenzene (**2e**, 0.2 mmol) and (*E*)-1-(2-bromovinyl)-4-methoxybenzene (**1a**, 0.2 mmol) according to General Procedure 5.

The crude residue was purified by silica gel chromatography (0 to 2% Et<sub>2</sub>O/hexanes) to yield **3e** (34.5 mg, 64% yield) in 93% ee as a white solid. The enantiomeric excess was determined by chiral SFC analysis (AD-H, 2.5 mL/min, 20% IPA in CO<sub>2</sub>, λ = 254 nm): *t<sub>R</sub>* (major) = 7.3 min, *t<sub>R</sub>* (minor) = 8.9 min. [α]<sub>D</sub><sup>25</sup> = -32.1° (c = 0.9, CHCl<sub>3</sub>); <sup>1</sup>H NMR (500 MHz, CDCl<sub>3</sub>) δ 7.35 – 7.28 (m, 2H), 7.27 – 7.15 (m, 2H), 6.91 – 6.82 (m, 4H), 6.36 (d, *J* = 16.2 Hz, 1H), 6.25 (dd, *J* = 15.9, 6.7 Hz, 1H), 3.83 – 3.80 (m, 6H), 3.65 – 3.55 (m, 1H),

1.45 (d,  $J = 7.0$  Hz, 3H);  $^{13}\text{C}$  NMR (126 MHz,  $\text{CDCl}_3$ )  $\delta$  158.8, 158.0, 138.0, 133.6, 130.5, 128.2, 127.7, 127.2, 113.94, 113.88, 55.3 (2C), 41.7, 21.4.; FTIR (NaCl, thin film): 2999, 2960, 2834, 1608, 1582, 1511, 1463, 1441, 1419, 1300, 1248, 1175, 1107, 1036, 968, 830, 818, 767  $\text{cm}^{-1}$ ; HRMS (MM) calc'd for  $\text{C}_{18}\text{H}_{20}\text{O}_2$   $[\text{M}]^+$  268.1463, found 268.1394.

#### **(*S,E*)-1-fluoro-4-(4-(4-methoxyphenyl)but-3-en-2-yl)benzene (3f)**

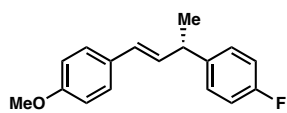

Prepared from 1-(1-chloroethyl)-4-fluorobenzene (**2f**, 0.2 mmol) and (*E*)-1-(2-bromovinyl)-4-methoxybenzene (**1a**, 0.2 mmol) according to General Procedure 5. The crude residue was purified by silica gel chromatography (0 to 2%  $\text{Et}_2\text{O}$ /hexanes) to

yield **3f** (41.4 mg, 81% yield) in 89% ee as a white solid. The enantiomeric excess was determined by chiral SFC analysis (OB-H, 2.5 mL/min, 15% IPA in  $\text{CO}_2$ ,  $\lambda = 254$  nm):  $t_{\text{R}}$  (major) = 5.6 min,  $t_{\text{R}}$  (minor) = 8.0 min.  $[\alpha]_{\text{D}}^{25} = -35.1^\circ$  ( $c = 1.0$ ,  $\text{CHCl}_3$ );  $^1\text{H}$  NMR (500 MHz,  $\text{CDCl}_3$ )  $\delta$  7.34 – 7.28 (m, 2H), 7.28 – 7.20 (m, 2H), 7.07 – 6.96 (m, 2H), 6.91 – 6.83 (m, 2H), 6.36 (d,  $J = 16.1$  Hz, 1H), 6.23 (dd,  $J = 15.9, 6.7$  Hz, 1H), 3.82 (s, 3H), 3.68 – 3.58 (m, 1H), 1.46 (d,  $J = 7.0$  Hz, 3H);  $^{13}\text{C}$  NMR (126 MHz,  $\text{CDCl}_3$ )  $\delta$  161.4 (d,  $J = 244$  Hz), 159.0, 141.5, 132.9, 130.3, 128.6 (d,  $J = 8$  Hz), 128.1, 127.2, 115.1 (d,  $J = 21$  Hz), 114.0, 55.3, 41.8, 21.4; FTIR (NaCl, thin film): 3032, 2963, 2835, 1607, 1577, 1510, 1464, 1419, 1298, 1251, 1223, 1175, 1159, 1107, 1035, 968, 835, 821, 769  $\text{cm}^{-1}$ ; HRMS (MM) calc'd for  $\text{C}_{17}\text{H}_{17}\text{FO}$   $[\text{M}]^+$  265.1263, found 265.1223.

#### **(*S,E*)-1-chloro-4-(4-(4-methoxyphenyl)but-3-en-2-yl)benzene (3g)**

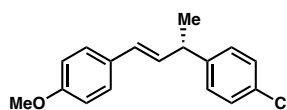

Prepared from 1-(1-chloroethyl)-4-chlorobenzene (**2g**, 0.2 mmol) and (*E*)-1-(2-bromovinyl)-4-methoxybenzene (**1a**, 0.2 mmol) according to General Procedure 6. The crude residue was purified by silica gel chromatography (0 to 2%  $\text{Et}_2\text{O}$ /hexanes) to

yield **3g** (40.9 mg, 75% yield) in 88% ee as a white solid. The enantiomeric excess was determined by chiral SFC analysis (OB-H, 2.5 mL/min, 25% IPA in  $\text{CO}_2$ ,  $\lambda = 254$  nm):  $t_{\text{R}}$  (major) = 6.6 min,  $t_{\text{R}}$  (minor) = 9.4 min.  $[\alpha]_{\text{D}}^{25} = -27.9^\circ$  ( $c = 1.0$ ,  $\text{CHCl}_3$ );  $^1\text{H}$  NMR (500 MHz,  $\text{CDCl}_3$ )  $\delta$  7.35 – 7.26 (m, 4H), 7.25 – 7.18 (m, 2H), 6.91 – 6.82 (m, 2H), 6.36 (d,  $J = 16.0$  Hz, 1H), 6.21 (dd,  $J = 15.9, 6.8$  Hz, 1H), 3.82 (s, 3H), 3.66 – 3.56 (m, 1H), 1.45 (d,  $J = 7.0$  Hz, 3H);  $^{13}\text{C}$  NMR (126 MHz,  $\text{CDCl}_3$ )  $\delta$  159.0, 144.4, 132.5, 131.8, 130.2, 128.6, 128.5, 128.4, 127.3, 114.0, 55.3, 41.9, 21.3; FTIR (NaCl, thin film): 3030, 2963, 2834, 1607, 1576, 1511, 1491, 1463, 1408, 1297, 1251, 1174, 1091, 1035, 1012, 967, 828, 817  $\text{cm}^{-1}$ ; HRMS (MM) calc'd for  $\text{C}_{17}\text{H}_{17}\text{ClO}$   $[\text{M}]^+$  272.0968, found 272.0904.

#### **(*S,E*)-1-bromo-4-(4-(4-methoxyphenyl)but-3-en-2-yl)benzene (3h)**

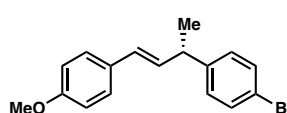

Prepared from 1-(1-chloroethyl)-4-bromobenzene (**2h**, 0.2 mmol) and (*E*)-1-(2-bromovinyl)-4-methoxybenzene (**1a**, 0.2 mmol) according to General Procedure 5. The crude residue was purified by silica gel chromatography (5 to 15% toluene/hexanes) to

yield **3h** (37.6 mg, 59% yield) in 90% ee as a white solid. The enantiomeric excess was determined by chiral SFC

analysis (OB-H, 2.5 mL/min, 35% IPA in CO<sub>2</sub>, λ = 254 nm): *t<sub>R</sub>* (major) = 5.4 min, *t<sub>R</sub>* (minor) = 9.0 min. [α]<sub>D</sub><sup>25</sup> = -30.1° (c = 0.9, CHCl<sub>3</sub>); <sup>1</sup>H NMR (500 MHz, CDCl<sub>3</sub>) δ 7.51 – 7.38 (m, 2H), 7.38 – 7.22 (m, 2H), 7.22 – 7.08 (m, 2H), 6.91 – 6.78 (m, 2H), 6.36 (d, *J* = 15.8 Hz, 1H), 6.20 (dd, *J* = 15.9, 6.8 Hz, 1H), 3.82 (s, 3H), 3.71 – 3.47 (m, 1H), 1.45 (d, *J* = 6.9 Hz, 3H); <sup>13</sup>C NMR (126 MHz, CDCl<sub>3</sub>) δ 159.0, 144.9, 132.4, 131.5, 130.2, 129.1, 128.4, 127.3, 119.8, 114.0, 55.3, 42.0, 21.2; FTIR (NaCl, thin film): 2962, 2930, 2834, 1607, 1577, 1511, 1487, 1297, 1250, 1174, 1073, 1035, 1008, 967, 816 cm<sup>-1</sup>; HRMS (MM) calc'd for C<sub>17</sub>H<sub>17</sub>BrO [M+H]<sup>+</sup> 317.0536, found 317.0449.

### (*S,E*)-1-methoxy-4-(3-(4-(trifluoromethoxy)phenyl)but-1-en-1-yl)benzene (**3i**)

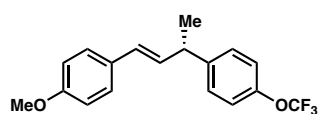

Prepared from 1-(1-chloroethyl)-4-(trifluoromethoxy)benzene (**2i**, 0.2 mmol) and (*E*)-1-(2-bromovinyl)-4-methoxybenzene (**1a**, 0.2 mmol) according to General Procedure 6. The crude residue was purified by silica gel chromatography (5 to 15%

toluene/hexanes) to yield **3i** (54.2 mg, 84% yield) in 88% ee as a white solid. The enantiomeric excess was determined by chiral SFC analysis (AD-H, 2.5 mL/min, 7% IPA in CO<sub>2</sub>, λ = 254 nm): *t<sub>R</sub>* (major) = 7.7 min, *t<sub>R</sub>* (minor) = 8.8 min. [α]<sub>D</sub><sup>25</sup> = -27.2° (c = 1.1, CHCl<sub>3</sub>); <sup>1</sup>H NMR (500 MHz, CDCl<sub>3</sub>) δ 7.37 – 7.23 (m, 4H), 7.23 – 7.13 (m, 2H), 6.90 – 6.83 (m, 2H), 6.38 (d, *J* = 16.0 Hz, 1H), 6.22 (dd, *J* = 15.9, 6.8 Hz, 1H), 3.82 (s, 3H), 3.70 – 3.61 (m, 1H), 1.47 (d, *J* = 7.1 Hz, 3H); <sup>13</sup>C NMR (126 MHz, CDCl<sub>3</sub>) δ 159.0, 147.6, 144.6, 132.4, 130.2, 128.5, 128.4, 127.3, 120.9, 114.0, 55.3, 41.9, 21.3; FTIR (NaCl, thin film): 3033, 2965, 2836, 1607, 1577, 1511, 1465, 1420, 1374, 1255, 1223, 1174, 1106, 1036, 1015, 968, 849, 819 cm<sup>-1</sup>; HRMS (MM) calc'd for C<sub>18</sub>H<sub>17</sub>F<sub>3</sub>O<sub>2</sub> [M]<sup>+</sup> 322.1181, found 322.1105.

### (*S,E*)-1-methoxy-4-(3-phenylpent-1-en-1-yl)benzene (**3j**)

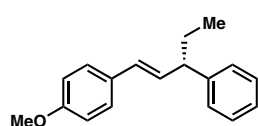

Prepared from (1-chloropropyl)benzene (**2j**, 0.2 mmol) and (*E*)-1-(2-bromovinyl)-4-methoxybenzene (**1a**, 0.2 mmol) according to General Procedure 5. The crude residue was purified by silica gel chromatography (5 to 15% toluene/hexanes) to yield **3j** (40.3 mg,

80% yield) in 97% ee as a white solid. The enantiomeric excess was determined by chiral SFC analysis (OB-H, 2.5 mL/min, 15% IPA in CO<sub>2</sub>, λ = 254 nm): *t<sub>R</sub>* (minor) = 7.7 min, *t<sub>R</sub>* (major) = 9.3 min. [α]<sub>D</sub><sup>25</sup> = -47.8° (c = 0.9, CHCl<sub>3</sub>); <sup>1</sup>H NMR (500 MHz, CDCl<sub>3</sub>) δ 7.39 – 7.19 (m, 5H), 6.90 – 6.83 (m, 2H), 6.38 (d, *J* = 14.8 Hz, 1H), 6.23 (dd, *J* = 15.8, 7.9 Hz, 1H), 3.82 (s, 3H), 3.32 (q, *J* = 7.3 Hz, 1H), 1.86 (pd, *J* = 7.4, 2.4 Hz, 2H), 0.95 (t, *J* = 7.4 Hz, 3H); <sup>13</sup>C NMR (126 MHz, CDCl<sub>3</sub>) δ 158.9, 144.8, 132.2, 130.6, 128.9, 128.4, 127.7, 127.2, 126.1, 113.9, 55.3, 51.0, 28.9, 12.2; FTIR (NaCl, thin film): 3025, 2958, 2929, 2834, 1607, 1510, 1451, 1300, 1247, 1174, 1107, 1034, 964, 830, 757 cm<sup>-1</sup>; HRMS (MM) calc'd for C<sub>18</sub>H<sub>20</sub>O [M]<sup>+</sup> 252.1514, found 252.1466.

### (*S,E*)-4-(4-methoxyphenyl)but-3-ene-1,2-diyl)dibenzene (**3k**)

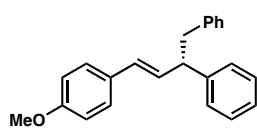

Prepared from (1-chloroethane-1,2-diyl)dibenzene (**2k**, 0.2 mmol) and (*E*)-1-(2-bromovinyl)-4-methoxybenzene (**1a**, 0.2 mmol) according to General Procedure 5. The crude residue was purified by silica gel chromatography (0 to 2% Et<sub>2</sub>O/hexanes) to yield **3k** (51.3 mg, 82% yield) in 94% ee as a white solid. The enantiomeric excess was determined by chiral SFC analysis (AS-H, 2.5 mL/min, 10% IPA in CO<sub>2</sub>, λ = 254 nm): *t<sub>R</sub>* (minor) = 5.8 min, *t<sub>R</sub>* (major) = 6.4 min. [α]<sub>D</sub><sup>25</sup> = +18.9° (c = 1.0, CHCl<sub>3</sub>); <sup>1</sup>H NMR (500 MHz, CDCl<sub>3</sub>) δ 7.45 – 7.02 (m, 10H), 6.94 – 6.78 (m, 2H), 6.40 – 6.24 (m, 2H), 3.82 (s, 3H), 3.76 (q, *J* = 7.2 Hz, 1H), 3.22 – 3.09 (m, 2H); <sup>13</sup>C NMR (126 MHz, CDCl<sub>3</sub>) δ 158.9, 144.1, 140.1, 131.3, 130.4, 129.4, 129.3, 128.4, 128.1, 127.9, 127.3, 126.3, 125.9, 113.9, 55.3, 50.9, 42.8; FTIR (NaCl, thin film): 3060, 3026, 2932, 2834, 1607, 1577, 1511, 1494, 1452, 1299, 1249, 1174, 1109, 1033, 965, 820, 756 cm<sup>-1</sup>; HRMS (MM) calc'd for C<sub>23</sub>H<sub>22</sub>O [M+H]<sup>+</sup> 315.1743, found 315.1699.

### (*S,E*)-1-methoxy-4-(3-phenylocta-1,7-dien-1-yl)benzene (**3l**)

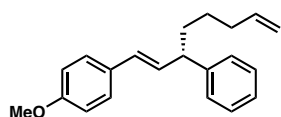

Prepared from (1-chlorohex-5-en-1-yl)benzene (**2l**, 0.2 mmol) and (*E*)-1-(2-bromovinyl)-4-methoxybenzene (**1a**, 0.2 mmol) according to General Procedure 5. The crude residue was purified by silica gel chromatography (5 to 15% toluene/hexanes) to yield **3l** (39.6 mg, 68% yield) in 94% ee as a clear oil. The enantiomeric excess was determined by chiral SFC analysis (AS-H, 2.5 mL/min, 10% IPA in CO<sub>2</sub>, λ = 254 nm): *t<sub>R</sub>* (minor) = 3.1 min, *t<sub>R</sub>* (major) = 3.7 min. [α]<sub>D</sub><sup>25</sup> = -22.7° (c = 1.2, CHCl<sub>3</sub>); <sup>1</sup>H NMR (500 MHz, CDCl<sub>3</sub>) δ 7.39 – 7.19 (m, 7H), 6.89 – 6.81 (m, 2H), 6.36 (d, *J* = 15.8 Hz, 1H), 6.21 (dd, *J* = 15.8, 7.9 Hz, 1H), 5.81 (ddt, *J* = 17.0, 10.2, 6.7 Hz, 1H), 5.06 – 4.93 (m, 2H), 3.81 (s, 3H), 3.41 (q, *J* = 7.6 Hz, 1H), 2.15 – 2.04 (m, 2H), 1.87 – 1.77 (m, 2H), 1.53 – 1.32 (m, 2H); <sup>13</sup>C NMR (126 MHz, CDCl<sub>3</sub>) δ 158.9, 144.8, 138.7, 132.2, 130.4, 128.8, 128.5, 127.6, 127.2, 126.1, 114.5, 113.9, 55.3, 49.1, 35.5, 33.7, 27.0; FTIR (NaCl, thin film): 3060, 3026, 2931, 2856, 2834, 1639, 1607, 1577, 1511, 1493, 1464, 1452, 1441, 1418, 1299, 1250, 1174, 1108, 1036, 965, 910, 828, 759 cm<sup>-1</sup>; HRMS (MM) calc'd for C<sub>21</sub>H<sub>24</sub>O [M+H]<sup>+</sup> 293.1900, found 293.1867.

### (*S,E*)-5-(4-methoxyphenyl)-3-phenylpent-4-en-1-ol (**3m**)

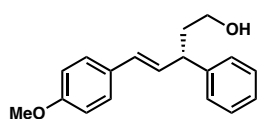

Prepared from 3-chloro-3-phenylpropan-1-ol (**2m**, 0.2 mmol) and (*E*)-1-(2-bromovinyl)-4-methoxybenzene (**1a**, 0.2 mmol) according to General Procedure 5. The crude residue was purified by silica gel chromatography (10 to 20% ethyl acetate/hexanes) to yield **3m** (43.3 mg, 81% yield) in 96% ee as a white solid. The enantiomeric excess was determined by chiral SFC analysis (OB-H, 2.5 mL/min, 30% IPA in CO<sub>2</sub>, λ = 254 nm): *t<sub>R</sub>* (minor) = 5.5 min, *t<sub>R</sub>* (major) = 6.9 min. [α]<sub>D</sub><sup>25</sup> = -27.5° (c = 1.0, CHCl<sub>3</sub>); <sup>1</sup>H NMR (500 MHz, CDCl<sub>3</sub>) δ 7.38 – 7.20 (m, 7H), 6.90 – 6.81 (m, 2H), 6.41 (d, *J* = 15.5 Hz, 1H), 6.22 (dd, *J* = 15.8, 8.0 Hz, 1H), 3.81 (s, 3H), 3.74 – 3.60 (m, 3H), 2.18 – 2.01 (m, 2H); <sup>13</sup>C NMR (126 MHz,

CDCl<sub>3</sub>)  $\delta$  158.9, 144.1, 131.4, 130.1, 129.1, 128.6, 127.6, 127.3, 126.4, 113.9, 61.0, 55.3, 45.5, 38.5; FTIR (NaCl, thin film): 3350, 3026, 2933, 2835, 1607, 1577, 1511, 1492, 1452, 1300, 1249, 1175, 1033, 967, 809, 760 cm<sup>-1</sup>; HRMS (MM) calc'd for C<sub>18</sub>H<sub>20</sub>O<sub>2</sub> [M+H]<sup>+</sup> 269.1536, found 269.1470.

### (*S,E*)-1-(5-chloro-3-phenylpent-1-en-1-yl)-4-methoxybenzene (**3n**)

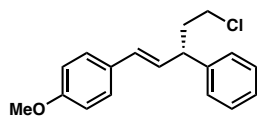

Prepared from (1,3-dichloropropyl)benzene (**2n**, 0.2 mmol) and (*E*)-1-(2-bromovinyl)-4-methoxybenzene (**1a**, 0.2 mmol) according to General Procedure 6. The crude residue was purified by silica gel chromatography (5 to 20% toluene/hexanes) to yield **3n** (34.3 mg, 60% yield) in 94% ee as a clear oil. The enantiomeric excess was determined by chiral SFC analysis (AS-H, 2.5 mL/min, 3% ACN in CO<sub>2</sub>,  $\lambda$  = 254 nm):  $t_R$  (major) = 15.5 min,  $t_R$  (minor) = 22.0 min.  $[\alpha]_D^{25} = -10.9^\circ$  (c = 1.0, CHCl<sub>3</sub>); <sup>1</sup>H NMR (500 MHz, CDCl<sub>3</sub>)  $\delta$  7.41 – 7.15 (m, 7H), 6.91 – 6.82 (m, 2H), 6.44 (d,  $J$  = 16.1 Hz, 3H), 6.18 (dd,  $J$  = 15.8, 8.0 Hz, 1H), 3.81 (s, 3H), 3.76 – 3.68 (m, 1H), 3.61 – 3.45 (m, 2H), 2.34 – 2.19 (m, 2H); <sup>13</sup>C NMR (126 MHz, CDCl<sub>3</sub>)  $\delta$  159.0, 143.1, 130.1, 129.9, 129.8, 128.7, 127.6, 127.3, 126.6, 113.9, 55.3, 45.9, 43.1, 38.4; FTIR (NaCl, thin film): 3027, 2956, 2835, 1607, 1576, 1511, 1492, 1452, 1291, 1250, 1175, 1034, 967, 760, 701 cm<sup>-1</sup>; HRMS (MM) calc'd for C<sub>18</sub>H<sub>19</sub>ClO [M]<sup>+</sup> 286.1119, found 286.1119.

### (*S,E*)-1-methyl-4-(3-phenylbut-1-en-1-yl)benzene (**5a**)

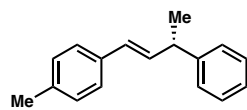

Prepared from (1-chloroethyl)benzene (**2a**, 0.2 mmol) and (*E*)-1-(2-bromovinyl)-4-methylbenzene (0.2 mmol) according to General Procedure 5. The crude residue was purified by silica gel chromatography (hexanes, 6% AgNO<sub>3</sub>-adsorbed silica gel) to yield **5a** (36.9 mg, 83% yield) in 96% ee as a clear oil. The enantiomeric excess was determined by chiral SFC analysis (OJ-H, 2.5 mL/min, 7% IPA in CO<sub>2</sub>,  $\lambda$  = 254 nm):  $t_R$  (minor) = 7.5 min,  $t_R$  (major) = 9.3 min.  $[\alpha]_D^{25} = -47.3^\circ$  (c = 1.1, CHCl<sub>3</sub>); <sup>1</sup>H NMR (500 MHz, CDCl<sub>3</sub>)  $\delta$  7.49 – 7.18 (m, 7H), 7.17 – 7.08 (m, 2H), 6.53 – 6.23 (m, 2H), 3.73 – 3.59 (m, 1H), 2.35 (s, 3H), 1.54 – 1.42 (m, 3H); <sup>13</sup>C NMR (126 MHz, CDCl<sub>3</sub>)  $\delta$  145.8, 136.8, 134.8, 134.2, 129.2, 128.5, 128.4, 127.3, 126.2, 126.0, 42.6, 21.3, 21.2; FTIR (NaCl, thin film): 3083, 3024, 2964, 2924, 2870, 1602, 1512, 1492, 1451, 1371, 1154, 1017, 967, 803, 759 cm<sup>-1</sup>; HRMS (MM) calc'd for C<sub>17</sub>H<sub>18</sub> [M+H<sub>2</sub>O]<sup>+</sup> 240.1509, found 240.1517.

The optical rotation of the product generated in the presence of (*R,R,S,S*)-**L6** was measured as  $[\alpha]_D^{25} = -47.3^\circ$  (c = 1.1, CHCl<sub>3</sub>). Lit:  $[\alpha]_D^{20} = +38.4^\circ$  (c = 0.98, CHCl<sub>3</sub>, *R* enantiomer, 91% ee). Based on the literature precedent, we assign our product as the *S* enantiomer.<sup>13</sup>

<sup>13</sup> Ye, J.; Zhao, J.; Xu, J.; Mao, Y.; Zhang, Y. *J. Chem. Commun.* **2013**, 49, 9761.



### (*S,E*)-1-fluoro-4-(3-phenylbut-1-en-1-yl)benzene (**5b**)

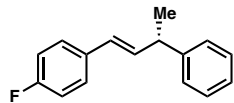

Prepared from (1-chloroethyl)benzene (**2a**, 0.2 mmol) and (*E*)-1-(2-bromovinyl)-4-fluorobenzene (**1b**, 0.2 mmol) according to General Procedure 5. The crude residue was purified by silica gel chromatography (hexanes, 6% AgNO<sub>3</sub>-adsorbed silica gel) to yield **5b** (33.7 mg, 74% yield) in 94% ee as a clear oil. The enantiomeric excess was determined by chiral SFC analysis (OJ-H, 2.5 mL/min, 7% IPA in CO<sub>2</sub>, λ = 254 nm): *t*<sub>R</sub> (minor) = 5.9 min, *t*<sub>R</sub> (major) = 7.1 min. [α]<sub>D</sub><sup>25</sup> = -34.6° (c = 1.1, CHCl<sub>3</sub>); <sup>1</sup>H NMR (500 MHz, CDCl<sub>3</sub>) δ 7.48 – 7.12 (m, 7H), 7.10 – 6.88 (m, 2H), 6.47 – 6.21 (m, 2H), 3.81 – 3.53 (m, 1H), 1.49 (d, *J* = 7.2 Hz, 3H); <sup>13</sup>C NMR (126 MHz, CDCl<sub>3</sub>) δ 162.0 (d, *J* = 246 Hz), 145.5, 135.0, 133.7, 128.5, 127.6 (d, *J* = 8 Hz), 127.35, 127.28, 126.3, 115.3 (d, *J* = 22 Hz), 42.6, 21.2; FTIR (NaCl, thin film): 3025, 2965, 2927, 2871, 1602, 1508, 1492, 1451, 1226, 1157, 1094, 1011, 965, 855, 818, 761 cm<sup>-1</sup>; HRMS (MM) calc'd for C<sub>16</sub>H<sub>15</sub>F [M+Li]<sup>+</sup> 232.1304, found 232.1321.

### (*S,E*)-1-chloro-4-(3-phenylbut-1-en-1-yl)benzene (**5c**)

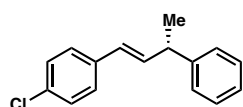

Prepared from (1-chloroethyl)benzene (**2a**, 0.2 mmol) and (*E*)-1-(2-bromovinyl)-4-chlorobenzene (**1c**, 0.2 mmol) according to General Procedure 6. The crude residue was purified by silica gel chromatography (hexanes, 6% AgNO<sub>3</sub>-adsorbed silica gel) to yield **5c** (32.1 mg, 66% yield) in 95% ee as a clear oil. The enantiomeric excess was determined by chiral SFC analysis (OJ-H, 2.5 mL/min, 10% IPA in CO<sub>2</sub>, λ = 254 nm): *t*<sub>R</sub> (minor) = 6.4 min, *t*<sub>R</sub> (major) = 7.9 min. [α]<sub>D</sub><sup>25</sup> = -42.2° (c = 1.0, CHCl<sub>3</sub>); <sup>1</sup>H NMR (500 MHz, CDCl<sub>3</sub>) δ 7.53 – 7.09 (m, 9H), 6.45 – 6.32 (m, 2H), 3.70 – 3.60 (m, 1H), 1.49 (d, *J* = 7.0 Hz, 3H); <sup>13</sup>C NMR (126 MHz, CDCl<sub>3</sub>) δ 145.3, 136.1, 136.0, 132.6, 128.6, 127.6, 127.4, 127.3, 126.3, 42.6, 21.1; FTIR (NaCl, thin film): 3082, 3060, 3026, 2965, 2927, 2871, 1646, 1602, 1491, 1451, 1404, 1372, 1062, 1012, 966, 858, 810, 761 cm<sup>-1</sup>; HRMS (ESI) calc'd for C<sub>16</sub>H<sub>15</sub>Cl [M+H]<sup>+</sup> 243.0935, found 243.0985.

The optical rotation of the product generated in the presence of (*R,R,S,S*)-**L6** was measured as [α]<sub>D</sub><sup>25</sup> = -42.2° (c = 1.0, CHCl<sub>3</sub>). Lit: [α]<sub>D</sub><sup>20</sup> = +33° (c = 1.0, CHCl<sub>3</sub>, *R* enantiomer, 91% ee).<sup>14</sup> Based on the literature precedent, we assign our product as the *S* enantiomer.

### (*S,E*)-1-(3-phenylbut-1-en-1-yl)-4-(trifluoromethyl)benzene (**5d**)

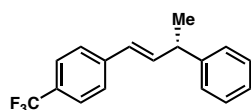

Prepared from (1-chloroethyl)benzene (**2a**, 0.2 mmol) and (*E*)-1-(2-bromovinyl)-4-(trifluoromethyl)benzene (**1d**, 0.2 mmol) according to General Procedure 6. The crude residue was purified by silica gel chromatography (hexanes) to yield **5d** (27.0 mg, 49% yield) in 94% ee as a clear oil. The enantiomeric excess was determined by chiral SFC analysis (OJ-H, 2.5

<sup>14</sup> Li, M.-B.; Wang, Y.; Tian, S.-K. *Angew. Chem., Int. Ed.* **2012**, *51*, 2968.

mL/min, 3% IPA in CO<sub>2</sub>, λ = 254 nm): *t<sub>R</sub>* (minor) = 5.4 min, *t<sub>R</sub>* (major) = 6.3 min. [ $\alpha$ ]<sub>D</sub><sup>25</sup> = -33.1° (c = 0.9, CHCl<sub>3</sub>); <sup>1</sup>H NMR (500 MHz, CDCl<sub>3</sub>) δ 7.59 – 7.52 (m, 2H), 7.49 – 7.41 (m, 2H), 7.40 – 7.21 (m, 4H), 6.52 (dd, *J* = 15.9, 6.3 Hz, 1H), 6.45 (d, *J* = 16.0 Hz, 1H), 3.73 – 3.63 (m, 1H), 1.50 (d, *J* = 7.0 Hz, 3H); <sup>13</sup>C NMR (126 MHz, CDCl<sub>3</sub>) δ 145.0, 138.0, 128.6, 127.6, 127.33, 127.29, 126.4, 126.3, 125.4 (q, *J* = 4 Hz), 124.3 (q, *J* = 272 Hz) 42.6, 21.0; FTIR (NaCl, thin film): 3027, 2967, 1614, 1493, 1452, 1413, 1326, 1164, 1122, 1067, 1016, 967, 864, 820, 760 cm<sup>-1</sup>; HRMS (MM) calc'd for C<sub>17</sub>H<sub>15</sub>F<sub>3</sub> [M+H]<sup>+</sup> 227.1199, found 227.1490.

#### (*S,E*)-1-(3-phenylbut-1-en-1-yl)-4-(trifluoromethoxy)benzene (**5e**)

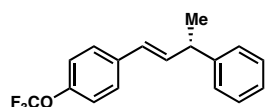

Prepared from (1-chloroethyl)benzene (**2a**, 0.2 mmol) and (*E*)-1-(2-bromovinyl)-4-(trifluoromethoxy)benzene (**1e**, 0.2 mmol) according to General Procedure 6. The crude residue was purified by silica gel chromatography (hexanes, 6% AgNO<sub>3</sub>-adsorbed silica gel) to yield **5e** (47.1 mg, 81% yield) in 94% ee as a clear oil. The enantiomeric excess was determined by chiral SFC analysis (OJ-H, 2.5 mL/min, 10% IPA in CO<sub>2</sub>, λ = 254 nm): *t<sub>R</sub>* (minor) = 2.3 min, *t<sub>R</sub>* (major) = 2.5 min. [ $\alpha$ ]<sub>D</sub><sup>25</sup> = -27.9° (c = 1.0, CHCl<sub>3</sub>); <sup>1</sup>H NMR (500 MHz, CDCl<sub>3</sub>) δ 7.50 – 7.20 (m, 5H), 7.20 – 7.08 (m, 2H), 6.57 – 6.24 (m, 2H), 3.83 – 3.53 (m, 1H), 1.49 (d, *J* = 7.2 Hz, 3H); <sup>13</sup>C NMR (126 MHz, CDCl<sub>3</sub>) δ 148.1, 145.3, 136.4, 128.6, 128.3, 127.31, 127.28, 127.1, 126.4, 121.1, 42.6, 21.1; FTIR (NaCl, thin film): 3083, 3061, 3027, 2967, 2930, 2873, 1602, 1587, 1507, 1493, 1452, 1260, 1220, 1164, 1017, 965, 864, 762 cm<sup>-1</sup>; HRMS (MM) calc'd for C<sub>17</sub>H<sub>15</sub>F<sub>3</sub>O [M+H]<sup>+</sup> 293.1148, found 293.1237.

#### (*S,E*)-*tert*-butyldimethyl(4-(3-phenylbut-1-en-1-yl)phenoxy)silane (**5f**)

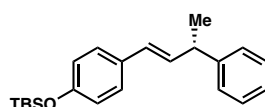

Prepared from (1-chloroethyl)benzene (**2a**, 0.2 mmol) and (*E*)-(4-(2-bromovinyl)phenoxy)(*tert*-butyl)dimethylsilane (**1f**, 0.2 mmol) according to General Procedure 6. The crude residue was purified by silica gel chromatography (hexanes, 6% AgNO<sub>3</sub>-adsorbed silica gel) to yield **5f** (55.4 mg, 82% yield) in 96% ee as a clear oil. The enantiomeric excess was determined by chiral SFC analysis (OJ-H, 2.5 mL/min, 5% IPA in CO<sub>2</sub>, λ = 254 nm): *t<sub>R</sub>* (major) = 8.6 min, *t<sub>R</sub>* (minor) = 13.2 min. [ $\alpha$ ]<sub>D</sub><sup>25</sup> = -31.1° (c = 1.1, CHCl<sub>3</sub>); <sup>1</sup>H NMR (500 MHz, CDCl<sub>3</sub>) δ 7.45 – 7.10 (m, 7H), 6.87 – 6.68 (m, 2H), 6.38 (d, *J* = 17.3 Hz, 1H), 6.27 (dd, *J* = 15.9, 6.8 Hz, 1H), 3.69 – 3.58 (m, 1H), 1.48 (d, *J* = 7.0 Hz, 3H), 1.00 (s, 9H), 0.21 (s, 6H); <sup>13</sup>C NMR (126 MHz, CDCl<sub>3</sub>) δ 154.9, 145.9, 133.2, 130.9, 128.5, 128.0, 127.3, 127.2, 126.1, 120.2, 42.6, 25.7, 21.3, 18.3, -4.4; FTIR (NaCl, thin film): 3060, 3027, 2958, 2929, 2884, 2857, 1604, 1508, 1472, 1462, 1451, 1362, 1264, 1168, 1099, 1009, 967, 914, 839, 822, 802, 781 cm<sup>-1</sup>; HRMS (MM) calc'd for C<sub>22</sub>H<sub>30</sub>OSi [M+H]<sup>+</sup> 339.2139, found 339.2118.

### (*S,E*)-*N,N*-dimethyl-4-(3-phenylbut-1-en-1-yl)aniline (**5g**)

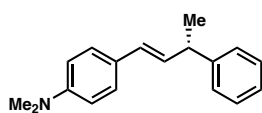

Prepared from (1-chloroethyl)benzene (**2a**, 0.2 mmol) and (*E*)-4-(2-bromovinyl)-*N,N*-dimethylaniline (**1g**, 0.2 mmol) according to General Procedure 6. The crude residue was purified by silica gel chromatography (20 to 40% toluene/hexanes) to yield **5g** (27.5 mg, 55% yield) in 95% ee as a white solid. The enantiomeric excess was determined by chiral SFC analysis (OB-H, 2.5 mL/min, 35% IPA in CO<sub>2</sub>, λ = 254 nm): *t*<sub>R</sub> (minor) = 5.7 min, *t*<sub>R</sub> (major) = 9.0 min. [α]<sub>D</sub><sup>25</sup> = -67.3° (c = 1.1, CHCl<sub>3</sub>); <sup>1</sup>H NMR (500 MHz, CDCl<sub>3</sub>) δ 7.38 – 7.17 (m, 7H), 6.70 (d, *J* = 8.3 Hz, 2H), 6.37 (d, *J* = 15.9 Hz, 1H), 6.21 (dd, *J* = 15.9, 6.8 Hz, 1H), 3.69 – 3.59 (m, 1H), 2.96 (s, 6H), 1.48 (d, *J* = 7.0 Hz, 3H); <sup>13</sup>C NMR (126 MHz, CDCl<sub>3</sub>) δ 149.8, 146.3, 131.2, 128.4, 128.2, 127.3, 127.0, 126.0, 112.6, 42.5, 40.7, 21.5; FTIR (NaCl, thin film): 3009, 2955, 2870, 2808, 1611, 1525, 1490, 1446, 1359, 1231, 1186, 1168, 1063, 1020, 958, 802, 754 cm<sup>-1</sup>; HRMS (MM) calc'd for C<sub>18</sub>H<sub>21</sub>N [M+H]<sup>+</sup> 252.1747, found 252.1789.

### (*S,E*)-1,2-dimethyl-3-(3-phenylbut-1-en-1-yl)benzene (**5h**)

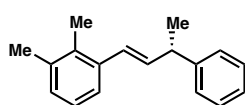

Prepared from (1-chloroethyl)benzene (**2a**, 0.2 mmol) and (*E*)-1-(2-bromovinyl)-2,3-dimethylbenzene (**1h**, 0.2 mmol) according to General Procedure 6. The crude residue was purified by silica gel chromatography (hexanes, 6% AgNO<sub>3</sub>-adsorbed silica gel) to yield **5h** (35.9 mg, 76% yield) in 96% ee as a clear oil. The enantiomeric excess was determined by chiral SFC analysis (OB-H, 2.5 mL/min, 4% EtOH in CO<sub>2</sub>, λ = 254 nm): *t*<sub>R</sub> (minor) = 4.4 min, *t*<sub>R</sub> (major) = 5.6 min. [α]<sub>D</sub><sup>25</sup> = -19.4° (c = 1.2, CHCl<sub>3</sub>); <sup>1</sup>H NMR (500 MHz, CDCl<sub>3</sub>) δ 7.46 – 7.16 (m, 7H), 7.08 (d, *J* = 4.7 Hz, 2H), 6.73 (dd, *J* = 15.6, 1.4 Hz, 1H), 6.23 (dd, *J* = 15.7, 6.9 Hz, 1H), 3.75 – 3.66 (m, 1H), 2.33 (s, 3H), 2.28 (s, 3H), 1.52 (d, *J* = 7.0 Hz, 3H); <sup>13</sup>C NMR (126 MHz, CDCl<sub>3</sub>) δ 145.8, 137.2, 137.0, 136.6, 133.8, 128.7, 128.5, 127.4, 127.3, 126.2, 125.5, 124.1, 42.8, 21.5, 20.7, 15.4; FTIR (NaCl, thin film): 3060, 3025, 2963, 2927, 2869, 1600, 1582, 1491, 1451, 1371, 1015, 971, 781, 759 cm<sup>-1</sup>; HRMS (MM) calc'd for C<sub>18</sub>H<sub>20</sub> [M]<sup>+</sup> 236.1565, found 236.1477.

### (*S,E*)-1,2-dimethoxy-4-(3-phenylbut-1-en-1-yl)benzene (**5i**)

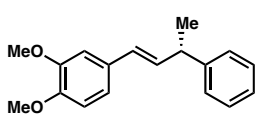

Prepared from (1-chloroethyl)benzene (**2a**, 0.2 mmol) and (*E*)-4-(2-bromovinyl)-1,2-dimethoxybenzene (**1i**, 0.2 mmol) according to General Procedure 6. The crude residue was purified by silica gel chromatography (20 to 40% toluene/hexanes) to yield **5i** (39.3 mg, 73% yield) in 95% ee as a clear oil. The enantiomeric excess was determined by chiral SFC analysis (OB-H, 2.5 mL/min, 25% IPA in CO<sub>2</sub>, λ = 254 nm): *t*<sub>R</sub> (minor) = 5.6 min, *t*<sub>R</sub> (major) = 7.8 min. [α]<sub>D</sub><sup>25</sup> = -36.4° (c = 1.1, CHCl<sub>3</sub>); <sup>1</sup>H NMR (500 MHz, CDCl<sub>3</sub>) δ 7.39 – 7.19 (m, 5H), 6.96 – 6.88 (m, 2H), 6.82 (d, *J* = 8.2 Hz, 1H), 6.38 (d, *J* = 15.9 Hz, 1H), 6.28 (dd, *J* = 15.8, 6.6 Hz, 1H), 3.90 (s, 3H), 3.89 (s, 3H), 3.70 – 3.61 (m, 1H), 1.49 (d, *J* = 7.1 Hz, 3H); <sup>13</sup>C NMR (126 MHz, CDCl<sub>3</sub>) δ 149.0, 148.4, 145.8, 133.4, 130.7, 128.5, 128.1, 127.3, 126.2, 119.1, 111.1, 108.5, 55.9, 55.8, 42.5, 21.3; FTIR (NaCl, thin film): 3058, 3024, 2961, 2931, 2833, 1601, 1583, 1513,

1492, 1463 1451, 1417, 1264, 1158, 1139, 1027, 966, 803, 763  $\text{cm}^{-1}$ ; HRMS (MM) calc'd for  $\text{C}_{18}\text{H}_{20}\text{O}_2$   $[\text{M}+\text{H}]^+$  269.1536, found 269.1534.

#### (*S,E*)-4,4,5,5-tetramethyl-2-(4-(3-phenylbut-1-en-1-yl)phenyl)-1,3,2-dioxaborolane (**5j**)

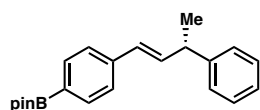

Prepared from (1-chloroethyl)benzene (**2a**, 0.2 mmol) and (*E*)-2-(4-(2-bromovinyl)phenyl)-4,4,5,5-tetramethyl-1,3,2-dioxaborolane (**1j**, 0.2 mmol) according to General Procedure 6. The crude residue was purified by silica gel chromatography (20 to 40% hexanes) to yield **5j** (39.4 mg, 59% yield) in 94% ee as a white solid. The enantiomeric excess was determined by chiral SFC analysis (OJ-H, 2.5 mL/min, 15% IPA in  $\text{CO}_2$ ,  $\lambda = 254$  nm):  $t_R$  (major) = 3.9 min,  $t_R$  (minor) = 7.5 min.  $[\alpha]_D^{25} = -33.5^\circ$  ( $c = 0.9$ ,  $\text{CHCl}_3$ );  $^1\text{H}$  NMR (500 MHz,  $\text{CDCl}_3$ )  $\delta$  7.80 – 7.72 (m, 2H), 7.40 – 7.19 (m, 7H), 6.53 – 6.39 (m, 2H), 3.71 – 3.62 (m, 1H), 1.49 (d,  $J = 7.2$  Hz, 3H), 1.36 (s, 12H);  $^{13}\text{C}$  NMR (126 MHz,  $\text{CDCl}_3$ )  $\delta$  145.5, 140.3, 136.4, 135.0, 128.6, 128.5, 127.3, 126.3, 125.5, 83.7, 42.7, 24.9, 21.2; FTIR (NaCl, thin film): 3025, 2975, 2929, 1607, 1602, 1492, 1452, 1397, 1360, 1321, 1270, 1144, 1090, 1017, 962, 860  $\text{cm}^{-1}$ ; HRMS (MM) calc'd for  $\text{C}_{22}\text{H}_{27}\text{BO}_2$   $[\text{M}]^+$  333.2140, found 333.1960.

#### (*S,E*)-4-(3-phenylbut-1-en-1-yl)phenol (**5k**)

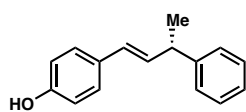

Prepared from (1-chloroethyl)benzene (**2a**, 0.2 mmol) and (*E*)-4-(2-bromovinyl)phenol (**1k**, 0.2 mmol) according to General Procedure 5. The crude residue was purified by silica gel chromatography (10 to 20% ethyl acetate/hexanes) to yield **5k** (38.6 mg, 86% yield) in 93% ee as a white solid. The enantiomeric excess was determined by chiral SFC analysis (OB-H, 2.5 mL/min, 30% IPA in  $\text{CO}_2$ ,  $\lambda = 254$  nm):  $t_R$  (major) = 3.0 min,  $t_R$  (minor) = 3.4 min.  $[\alpha]_D^{25} = -39.1^\circ$  ( $c = 0.8$ ,  $\text{CHCl}_3$ );  $^1\text{H}$  NMR (500 MHz,  $\text{CDCl}_3$ )  $\delta$  7.38 – 7.16 (m, 7H), 6.84 – 6.74 (m, 2H), 6.37 (d,  $J = 16.0$  Hz, 1H), 6.26 (dd,  $J = 15.9$ , 6.7 Hz, 1H), 4.89 (s, 1H), 3.69 – 3.60 (m, 1H), 1.48 (d,  $J = 7.0$  Hz, 3H);  $^{13}\text{C}$  NMR (126 MHz,  $\text{CDCl}_3$ )  $\delta$  154.6, 145.9, 133.2, 130.6, 128.5, 127.8, 127.5, 127.3, 126.2, 115.4, 42.5, 21.3; FTIR (NaCl, thin film): 3368, 3025, 2963, 2927, 2871, 1633, 1608, 1512, 1492, 1451, 1371, 1227, 1170, 1010, 966, 819, 762  $\text{cm}^{-1}$ ; HRMS (MM) calc'd for  $\text{C}_{16}\text{H}_{16}\text{O}$   $[\text{M}]^+$  224.1201, found 224.1164.

#### (*S,E*)-2-(3-phenylbut-1-en-1-yl)furan (**5l**)

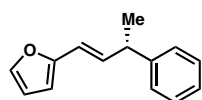

Prepared from (1-chloroethyl)benzene (**2a**, 0.2 mmol) and (*E*)-2-(2-bromovinyl)furan (**1l**, 0.2 mmol) according to General Procedure 6. The crude residue was purified by silica gel chromatography (hexanes) to yield **5l** (31.7 mg, 80% yield) in 91% ee as a yellow oil. The enantiomeric excess was determined by chiral SFC analysis (AD-H, 2.5 mL/min, 3% IPA in  $\text{CO}_2$ ,  $\lambda = 254$  nm):  $t_R$  (major) = 3.2 min,  $t_R$  (minor) = 3.5 min.  $[\alpha]_D^{25} = -48.3^\circ$  ( $c = 0.9$ ,  $\text{CHCl}_3$ ), lit.<sup>12</sup>  $[\alpha]_D^{20} = -48^\circ$  ( $c = 1.0$ ,  $\text{CHCl}_3$ , *S* enantiomer, 95% ee);  $^1\text{H}$  NMR (500 MHz,  $\text{CDCl}_3$ )  $\delta$  7.41 – 7.18 (m, 6H), 6.43 – 6.35 (m, 2H), 6.26 – 6.16 (m,

2H), 3.69 – 3.58 (m, 1H), 1.48 (d,  $J = 7.1$  Hz, 3H);  $^{13}\text{C}$  NMR (126 MHz,  $\text{CDCl}_3$ )  $\delta$  153.1, 145.3, 141.4, 134.2, 128.5, 127.3, 126.3, 117.4, 111.2, 106.7, 42.3, 21.1; FTIR (NaCl, thin film): 3060, 3026, 2965, 2928, 2871, 1602, 1491, 1452, 1371, 1255, 1151, 1012, 961, 928, 884, 760, 732  $\text{cm}^{-1}$ ; HRMS (MM) calc'd for  $\text{C}_{14}\text{H}_{14}\text{O}$   $[\text{M}+\text{H}]^+$  199.1117, found 199.1067.

#### (*S*,1*E*,3*E*)-hexa-1,3-diene-1,5-diyl dibenzene (**5m**)

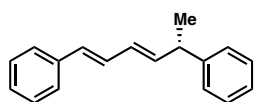

Prepared from (1-chloroethyl)benzene (**2a**, 0.2 mmol) and ((1*E*,3*E*)-4-bromobuta-1,3-dien-1-yl)benzene (**1m**, 0.2 mmol) according to General Procedure 5. The crude residue was purified by flash chromatography (hexanes, florisil) to yield **5m** (38.5 mg, 82% yield) in 92% ee as a white solid. The enantiomeric excess was determined by chiral SFC analysis (OB-H, 2.5 mL/min, 15% IPA in  $\text{CO}_2$ ,  $\lambda = 254$  nm):  $t_{\text{R}}$  (major) = 6.9 min,  $t_{\text{R}}$  (minor) = 9.4 min.  $[\alpha]_{\text{D}}^{25} = -34.1^\circ$  ( $c = 1.0$ ,  $\text{CHCl}_3$ );  $^1\text{H}$  NMR (500 MHz,  $\text{CDCl}_3$ )  $\delta$  7.43 – 7.16 (m, 9H), 6.80 (dd,  $J = 15.7, 10.4$  Hz, 1H), 6.52 (d,  $J = 15.7$  Hz, 1H), 6.26 (dd,  $J = 15.2, 10.4$  Hz, 1H), 6.03 (dd,  $J = 15.3, 6.8$  Hz, 1H), 3.66 – 3.56 (m, 1H), 1.46 (d,  $J = 7.0$  Hz, 3H);  $^{13}\text{C}$  NMR (126 MHz,  $\text{CDCl}_3$ )  $\delta$  145.6, 139.9, 137.5, 131.0, 129.20, 129.18, 128.6, 128.5, 127.3, 127.2, 126.23, 126.19, 42.5, 21.2; FTIR (NaCl, thin film): 3059, 3023, 2964, 2927, 2870, 1638, 1596, 1492, 1448, 1371, 1259, 1154, 1117, 1072, 988, 909, 760, 745  $\text{cm}^{-1}$ ; HRMS (MM) calc'd for  $\text{C}_{18}\text{H}_{18}$   $[\text{M}]^+$  234.1409, found 234.1342.

#### (*S*,*E*)-(4-cyclohexylbut-3-en-2-yl)benzene (**5n**)

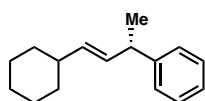

Prepared from (1-chloroethyl)benzene (**2a**, 0.2 mmol) and (*E*)-(2-bromovinyl)cyclohexane (**1n**, 0.2 mmol) according to General Procedure 5. The crude residue was purified by flash chromatography (hexanes) to yield **5n** (23.6 mg, 55% yield) in 96% ee as a clear oil. The enantiomeric excess was determined by chiral HPLC analysis (OJ-H, 1 mL/min, 1% IPA in hexanes,  $\lambda = 220$  nm):  $t_{\text{R}}$  (minor) = 5.1 min,  $t_{\text{R}}$  (major) = 5.8 min.  $[\alpha]_{\text{D}}^{25} = -5.5^\circ$  ( $c = 0.8$ ,  $\text{CHCl}_3$ );  $^1\text{H}$  NMR (500 MHz,  $\text{CDCl}_3$ )  $\delta$  7.35 – 7.26 (m, 2H), 7.26 – 7.16 (m, 3H), 5.57 (ddd,  $J = 15.5, 6.7, 1.2$  Hz, 1H), 5.44 (ddd,  $J = 15.4, 6.7, 1.2$  Hz, 1H), 3.47 – 3.37 (m, 1H), 2.01 – 1.89 (m, 1H), 1.78 – 1.61 (m, 4H), 1.35 (d,  $J = 7.0$  Hz, 3H), 1.32 – 1.01 (m, 6H);  $^{13}\text{C}$  NMR (126 MHz,  $\text{CDCl}_3$ )  $\delta$  146.7, 135.2, 132.3, 128.3, 127.2, 125.8, 42.2, 40.6, 33.20, 33.18, 26.2, 26.1, 21.7; FTIR (NaCl, thin film): 3024, 2962, 2922, 2850, 1601, 1492, 1448, 1371, 1009, 965, 759, 698  $\text{cm}^{-1}$ ; HRMS (MM) calc'd for  $\text{C}_{16}\text{H}_{22}$   $[\text{M}]^+$  214.1722, found 214.1689.

The optical rotation of the product generated in the presence of (*R,R,S,S*)-**L6** was measured as  $[\alpha]_{\text{D}}^{25} = -5.5^\circ$  ( $c = 0.8$ ,  $\text{CHCl}_3$ ). Lit:  $[\alpha]_{\text{D}}^{20} = +10.1^\circ$  ( $c = 0.45$ ,  $\text{CHCl}_3$ , *R* enantiomer, 95% ee).<sup>15</sup> Based on the literature precedent, we assign our product as the *S* enantiomer.

<sup>15</sup> Zhao, J.; Ye, J.; Zhang, Y. J. *Adv. Synth. Catal.* **2013**, 355, 491.

### (*S,E*)-5-phenylhex-3-en-1-yl benzoate (**5o**)

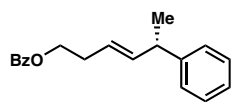

Prepared from (1-chloroethyl)benzene (**2a**, 0.2 mmol) and (*E*)-4-bromobut-3-en-1-yl benzoate (**1o**, 0.2 mmol) according to General Procedure 6. The crude residue was purified by silica gel chromatography (2% Et<sub>2</sub>O/hexanes) to yield **5o** (40.5 mg, 72% yield) in 94% ee as a clear oil. The enantiomeric excess was determined by chiral SFC analysis (OJ-H, 2.5 mL/min, 10% IPA in CO<sub>2</sub>, λ = 210 nm): *t*<sub>R</sub> (major) = 5.0 min, *t*<sub>R</sub> (minor) = 5.8 min. [α]<sub>D</sub><sup>25</sup> = 2.8° (c = 1.1, CHCl<sub>3</sub>); <sup>1</sup>H NMR (500 MHz, CDCl<sub>3</sub>) δ 8.09 – 7.99 (m, 2H), 7.63 – 7.54 (m, 1H), 7.51 – 7.40 (m, 2H), 7.31 – 7.14 (m, 5H), 5.78 (ddt, *J* = 15.4, 6.8, 1.4 Hz, 1H), 5.54 (dtd, *J* = 15.2, 6.8, 1.3 Hz, 1H), 4.37 (td, *J* = 6.7, 2.2 Hz, 2H), 3.52 – 3.43 (m, 1H), 2.51 (qt, *J* = 6.7, 1.1 Hz, 2H), 1.36 (d, *J* = 7.0 Hz, 3H); <sup>13</sup>C NMR (126 MHz, CDCl<sub>3</sub>) δ 166.6, 145.9, 138.2, 132.8, 130.4, 129.6, 128.4, 128.3, 127.1, 126.0, 124.1, 64.3, 42.3, 32.1, 21.3; FTIR (NaCl, thin film): 3061, 3027, 2963, 2929, 2898, 2872, 1720, 1602, 1584, 1492, 1451, 1380, 1314, 1274, 1176, 1116, 1070, 1026, 968, 760, 712 cm<sup>-1</sup>; HRMS (MM) calc'd for C<sub>19</sub>H<sub>20</sub>O<sub>2</sub> [M+H]<sup>+</sup> 281.1536, found 281.1522.

### (*S,E*)-5-phenylhex-3-en-1-ol (**5p**)

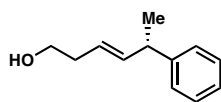

Prepared from (1-chloroethyl)benzene (**2a**, 0.2 mmol) and (*E*)-4-bromobut-3-en-1-ol (**1p**, 0.2 mmol) according to General Procedure 5. The crude residue was purified by silica gel chromatography (10 to 20% ethyl acetate/hexanes) to yield **5p** (19.7 mg, 56% yield) in 94% ee as a clear oil. The enantiomeric excess was determined by chiral SFC analysis (OJ-H, 2.5 mL/min, 2% MeOH in CO<sub>2</sub>, λ = 210 nm): *t*<sub>R</sub> (major) = 9.6 min, *t*<sub>R</sub> (minor) = 10.5 min. [α]<sub>D</sub><sup>25</sup> = +13.1° (c = 0.6, CHCl<sub>3</sub>); <sup>1</sup>H NMR (500 MHz, CDCl<sub>3</sub>) δ 7.35 – 7.27 (m, 2H), 7.25 – 7.15 (m, 3H), 5.77 (ddt, *J* = 15.4, 6.8, 1.4 Hz, 1H), 5.46 (dtd, *J* = 15.4, 7.0, 1.4 Hz, 1H), 3.66 (t, *J* = 6.2 Hz, 2H), 3.52 – 3.43 (m, 1H), 2.37 – 2.27 (m, 2H), 1.37 (d, *J* = 7.0 Hz, 3H); <sup>13</sup>C NMR (126 MHz, CDCl<sub>3</sub>) δ 145.9, 138.7, 128.4, 127.1, 126.1, 124.7, 62.1, 42.4, 35.9, 21.4; FTIR (NaCl, thin film): 3337, 3025, 2963, 2928, 1653, 1636, 1491, 1451, 1371, 1258, 1150, 1048, 968, 759 cm<sup>-1</sup>; HRMS (MM) calc'd for C<sub>12</sub>H<sub>16</sub>O [M+H]<sup>+</sup> 177.1274, found 177.1248.

### (*S,E*)-1-(4-methoxystyryl)-2,3-dihydro-1*H*-indene (**3o**)

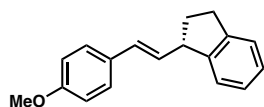

Prepared from 1-chloro-2,3-dihydro-1*H*-indene (**2o**, 0.2 mmol) and (*E*)-1-(2-bromovinyl)-4-methoxybenzene (**1a**, 0.2 mmol) according to General Procedure 6. The crude residue was purified by silica gel chromatography (5 to 15% toluene/hexanes) to yield **3o** (38.8 mg, 77% yield) in 94% ee as a white solid. The enantiomeric excess was determined by chiral SFC analysis (OB-H, 2.5 mL/min, 20% IPA in CO<sub>2</sub>, λ = 254 nm): *t*<sub>R</sub> (major) = 5.1 min, *t*<sub>R</sub> (minor) = 8.7 min. [α]<sub>D</sub><sup>25</sup> = -6.5° (c = 1.1, CHCl<sub>3</sub>); <sup>1</sup>H NMR (500 MHz, CDCl<sub>3</sub>) δ 7.39 – 7.32 (m, 2H), 7.32 – 7.16 (m, 4H), 6.91 – 6.85 (m, 2H), 6.51 (d, *J* = 15.7 Hz, 1H), 6.14 (dd, *J* = 15.9, 8.6 Hz, 1H), 3.97 – 3.88 (m, 1H), 3.83 (s, 3H), 3.06 – 2.89 (m, 2H), 2.49 – 2.38 (m, 1H), 2.01 – 1.89 (m, 1H); <sup>13</sup>C NMR (126 MHz, CDCl<sub>3</sub>) δ 158.9, 146.1, 144.0, 130.9, 130.3,

129.7, 127.3, 126.6, 126.2, 124.53, 124.50, 114.0, 55.3, 49.2, 33.7, 31.7; FTIR (NaCl, thin film): 3065, 3018, 2952, 2835, 1606, 1576, 1511, 1476, 1457, 1440, 1292, 1250, 1174, 1036, 965, 844, 811, 754, 740  $\text{cm}^{-1}$ ; HRMS (MM) calc'd for  $\text{C}_{16}\text{H}_{18}\text{O}$   $[\text{M}+\text{H}]^+$  251.1430, found 251.1371.

### **(*S,E*)-1-(4-methoxystyryl)-1,2,3,4-tetrahydronaphthalene (3p)**

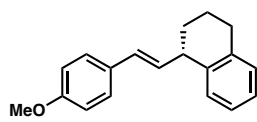

Prepared from 1-chloro-1,2,3,4-tetrahydronaphthalene (**2p**, 0.2 mmol) and (*E*)-1-(2-bromovinyl)-4-methoxybenzene (**1a**, 0.2 mmol) according to General Procedure 5. The crude residue was purified by silica gel chromatography (5 to 15% toluene/hexanes) to yield **3p** (21.2 mg, 40% yield) in 90% ee as a white solid. The enantiomeric excess was determined by chiral SFC

analysis (OB-H, 2.5 mL/min, 20% IPA in  $\text{CO}_2$ ,  $\lambda = 254$  nm):  $t_R$  (major) = 5.4 min,  $t_R$  (minor) = 8.3 min.  $[\alpha]_D^{25} = +9.1^\circ$  ( $c = 0.9$ ,  $\text{CHCl}_3$ );  $^1\text{H}$  NMR (500 MHz,  $\text{CDCl}_3$ )  $\delta$  7.36 – 7.28 (m, 2H), 7.25 – 7.19 (m, 1H), 7.20 – 7.09 (m, 3H), 6.91 – 6.81 (m, 2H), 6.38 (d,  $J = 15.7$  Hz, 1H), 6.16 (dd,  $J = 15.7, 8.5$  Hz, 1H), 3.82 (s, 3H), 3.66 – 3.58 (m, 1H), 2.91 – 2.77 (m, 2H), 2.10 – 1.91 (m, 2H), 1.86 – 1.72 (m, 2H);  $^{13}\text{C}$  NMR (126 MHz,  $\text{CDCl}_3$ )  $\delta$  158.8, 138.6, 137.0, 132.9, 130.4, 129.7, 129.6, 129.2, 127.2, 126.0, 125.6, 113.9, 55.3, 42.9, 30.5, 29.7, 21.0; FTIR (NaCl, thin film): 3014, 2930, 2856, 2834, 1607, 1577, 1511, 1489, 1463, 1450, 1297, 1249, 1174, 1035, 965, 843, 814, 755, 735  $\text{cm}^{-1}$ ; HRMS (MM) calc'd for  $\text{C}_{19}\text{H}_{20}\text{O}$   $[\text{M}+\text{H}]^+$  265.1587, found 265.1483.

### **((*S,1Z,7E*)-8-(4-methoxyphenyl)octa-1,7-diene-1,6-diyl)dibenzene (7)**

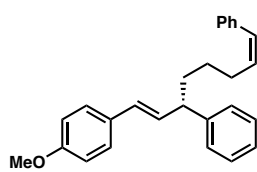

Prepared from **6** (0.2 mmol) and (*E*)-1-(2-bromovinyl)-4-methoxybenzene (**1a**, 0.2 mmol) according to General Procedure 5. The crude residue was purified by silica gel chromatography (hexanes) to yield **7** (45.8 mg, 62% yield) in 96% ee as a clear oil. The enantiomeric excess was determined by chiral SFC analysis (OJ-H, 2.5 mL/min, 10% IPA

in  $\text{CO}_2$ ,  $\lambda = 254$  nm):  $t_R$  (minor) = 7.2 min,  $t_R$  (major) = 7.9 min.  $[\alpha]_D^{25} = -2.0^\circ$  ( $c = 1.1$ ,  $\text{CHCl}_3$ );  $^1\text{H}$  NMR (500 MHz,  $\text{CDCl}_3$ )  $\delta$  7.43 – 7.13 (m, 12H), 6.94 – 6.75 (m, 2H), 6.43 (dt,  $J = 11.7, 1.9$  Hz, 1H), 6.34 (d,  $J = 16.4$  Hz, 1H), 6.20 (dd,  $J = 15.8, 7.9$  Hz, 1H), 5.65 (dt,  $J = 11.7, 7.2$  Hz, 1H), 3.81 (s, 3H), 3.50 – 3.30 (m, 1H), 2.39 (qd,  $J = 7.4, 1.8$  Hz, 2H), 1.94 – 1.74 (m, 2H), 1.64 – 1.35 (m, 2H);  $^{13}\text{C}$  NMR (126 MHz,  $\text{CDCl}_3$ )  $\delta$  158.8, 144.7, 137.7, 132.8, 132.1, 130.4, 129.0, 128.8, 128.7, 128.5, 128.1, 127.6, 127.2, 126.5, 126.2, 113.9, 55.3, 49.0, 35.5, 28.5, 27.9; FTIR (NaCl, thin film): 3057, 3024, 2931, 2856, 2834, 1607, 1576, 1511, 1492, 1452, 1300, 1249, 1174, 1035, 965, 914, 829, 804, 760, 699  $\text{cm}^{-1}$ ; HRMS (MM) calc'd for  $\text{C}_{27}\text{H}_{28}\text{O}$   $[\text{M}+\text{H}]^+$  369.2213, found 369.2219.

## 7. SFC Traces of Racemic and Enantioenriched Products

### 3a (Table 2, entry 1): racemic

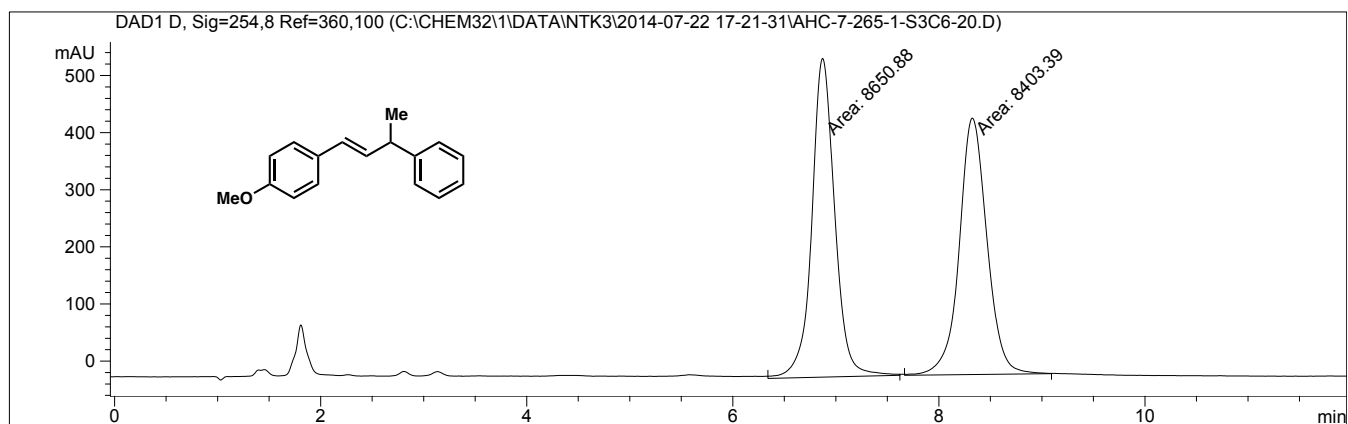

| Peak # | RetTime [min] | Type | Width [min] | Area [mAU*s] | Height [mAU] | Area %  |
|--------|---------------|------|-------------|--------------|--------------|---------|
| 1      | 6.871         | MM   | 0.2583      | 8650.88281   | 558.20911    | 50.7256 |
| 2      | 8.325         | MM   | 0.3119      | 8403.38672   | 449.10953    | 49.2744 |

### 3a (Table 2, entry 1): enantioenriched, 93% ee

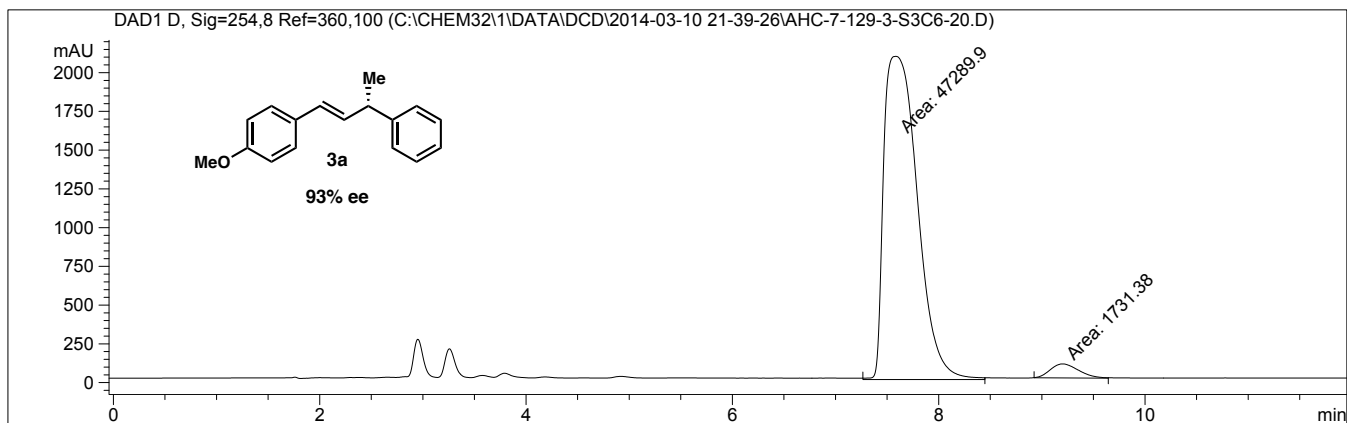

| Peak # | RetTime [min] | Type | Width [min] | Area [mAU*s] | Height [mAU] | Area %  |
|--------|---------------|------|-------------|--------------|--------------|---------|
| 1      | 7.587         | MM   | 0.3780      | 4.72899e4    | 2085.26416   | 96.4681 |
| 2      | 9.201         | MM   | 0.3190      | 1731.38208   | 90.45088     | 3.5319  |



**3b (Table 2, entry 2): racemic**

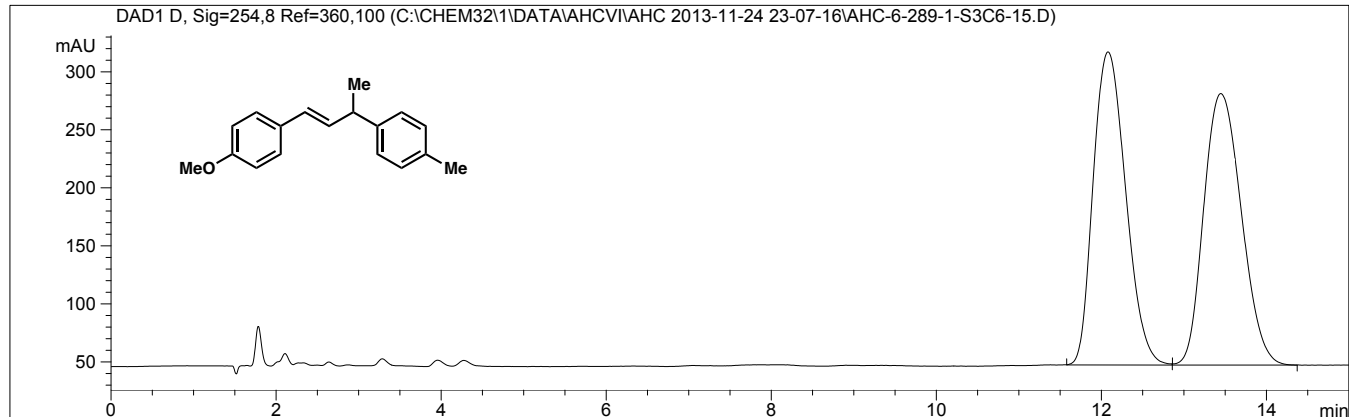

| Peak # | RetTime [min] | Type | Width [min] | Area [mAU*s] | Height [mAU] | Area %  |
|--------|---------------|------|-------------|--------------|--------------|---------|
| 1      | 12.081        | BB   | 0.4356      | 7393.43018   | 269.87115    | 49.9809 |
| 2      | 13.448        | BB   | 0.5069      | 7399.08838   | 233.99118    | 50.0191 |

**3b (Table 2, entry 2): enantioenriched, 94% ee**

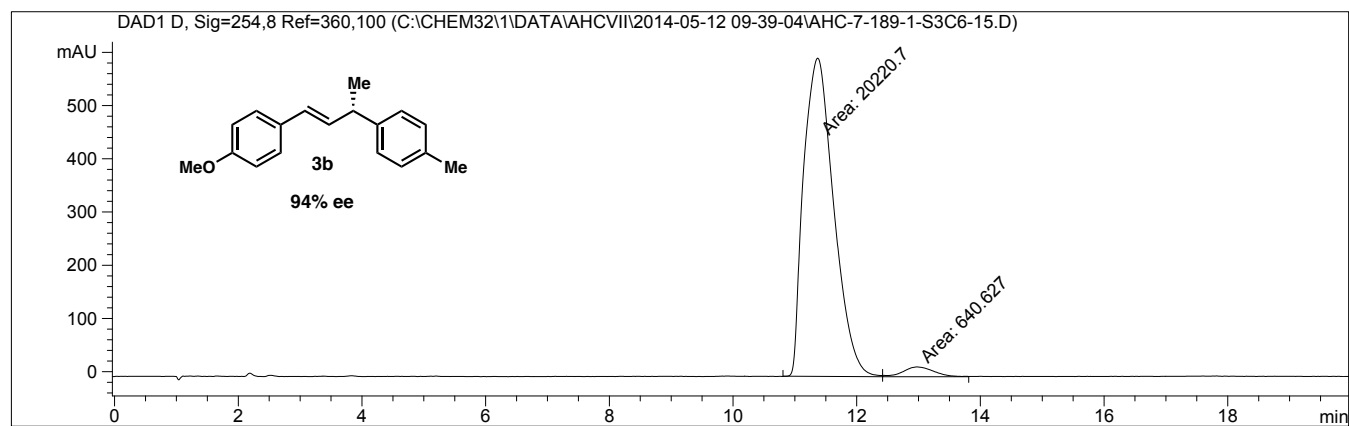

| Peak # | RetTime [min] | Type | Width [min] | Area [mAU*s] | Height [mAU] | Area %  |
|--------|---------------|------|-------------|--------------|--------------|---------|
| 1      | 11.369        | MM   | 0.5638      | 2.02207e4    | 597.78845    | 96.9291 |
| 2      | 12.970        | MM   | 0.5781      | 640.62689    | 18.46935     | 3.0709  |

**3c (Table 2, entry 3): racemic**

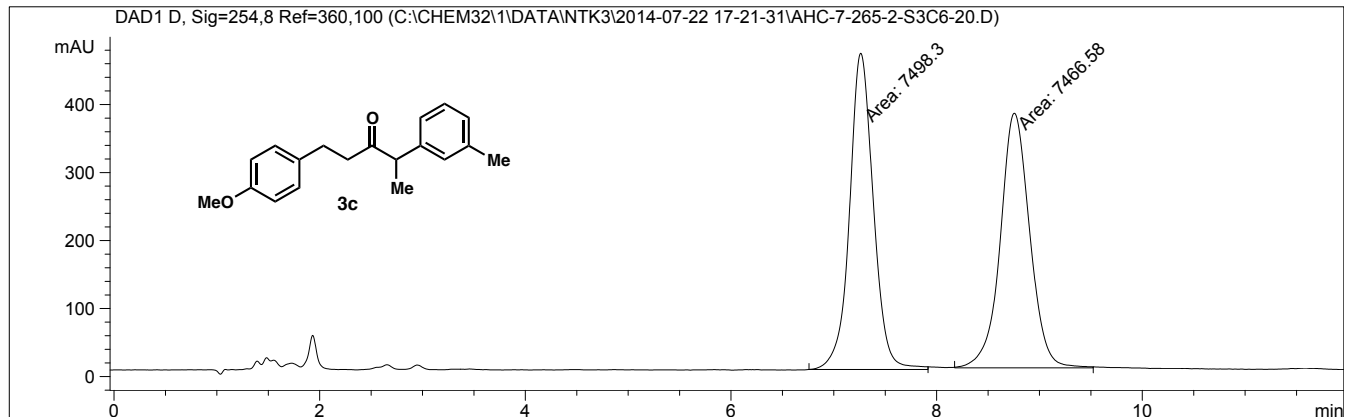

| Peak # | RetTime [min] | Type | Width [min] | Area [mAU*s] | Height [mAU] | Area %  |
|--------|---------------|------|-------------|--------------|--------------|---------|
| 1      | 7.261         | MM   | 0.2686      | 7498.30225   | 465.33981    | 50.1060 |
| 2      | 8.755         | MM   | 0.3322      | 7466.58496   | 374.60574    | 49.8940 |

**3c (Table 2, entry 3): enantioenriched, 93% ee**

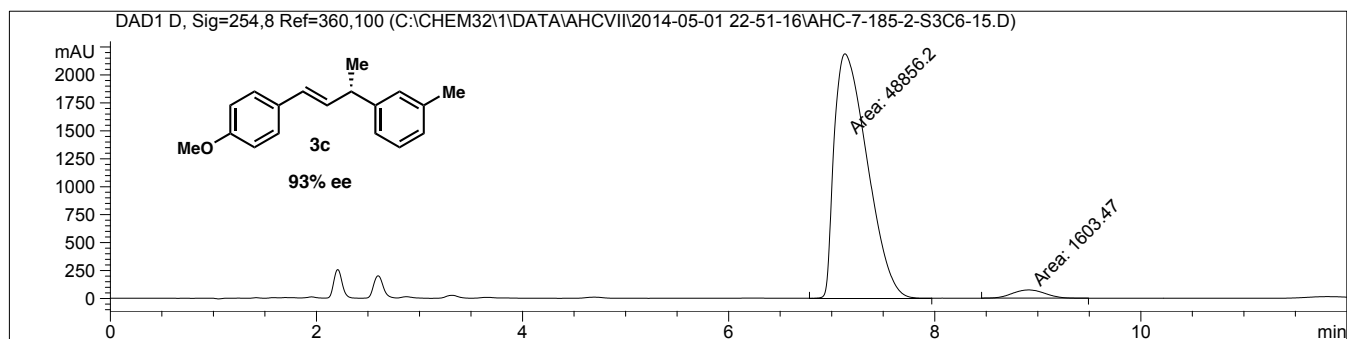

| Peak # | RetTime [min] | Type | Width [min] | Area [mAU*s] | Height [mAU] | Area %  |
|--------|---------------|------|-------------|--------------|--------------|---------|
| 1      | 7.129         | MM   | 0.3720      | 4.88562e4    | 2189.11938   | 96.8223 |
| 2      | 8.913         | MM   | 0.3645      | 1603.46533   | 73.32549     | 3.1777  |

**3d (Table 2, entry 4): racemic**

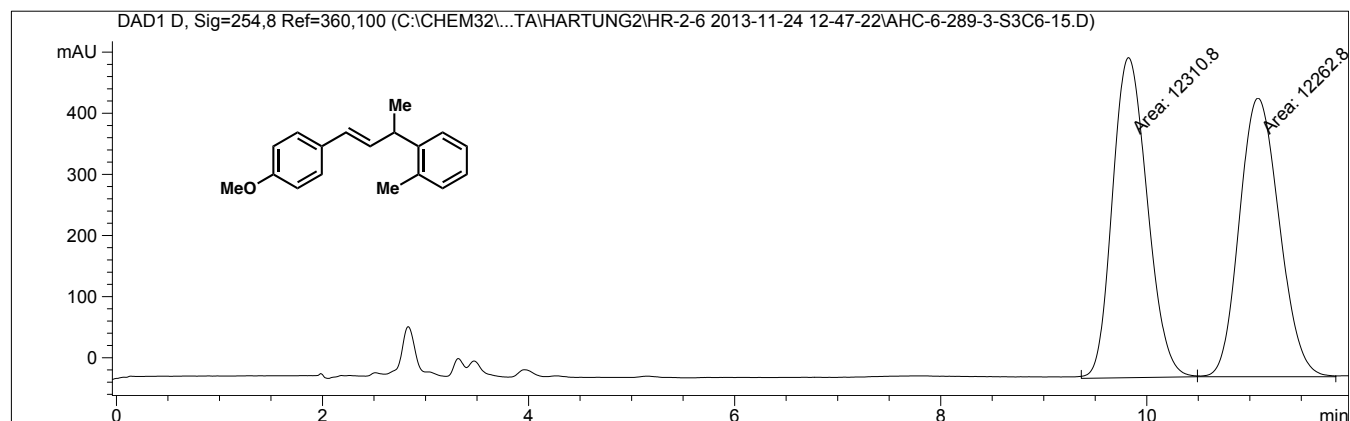

| Peak # | RetTime [min] | Type | Width [min] | Area [mAU*s] | Height [mAU] | Area %  |
|--------|---------------|------|-------------|--------------|--------------|---------|
| 1      | 9.822         | MM   | 0.3917      | 1.23108e4    | 523.83447    | 50.0978 |
| 2      | 11.079        | MM   | 0.4482      | 1.22628e4    | 456.04102    | 49.9022 |

**3d (Table 2, entry 4): enantioenriched, 85% ee**

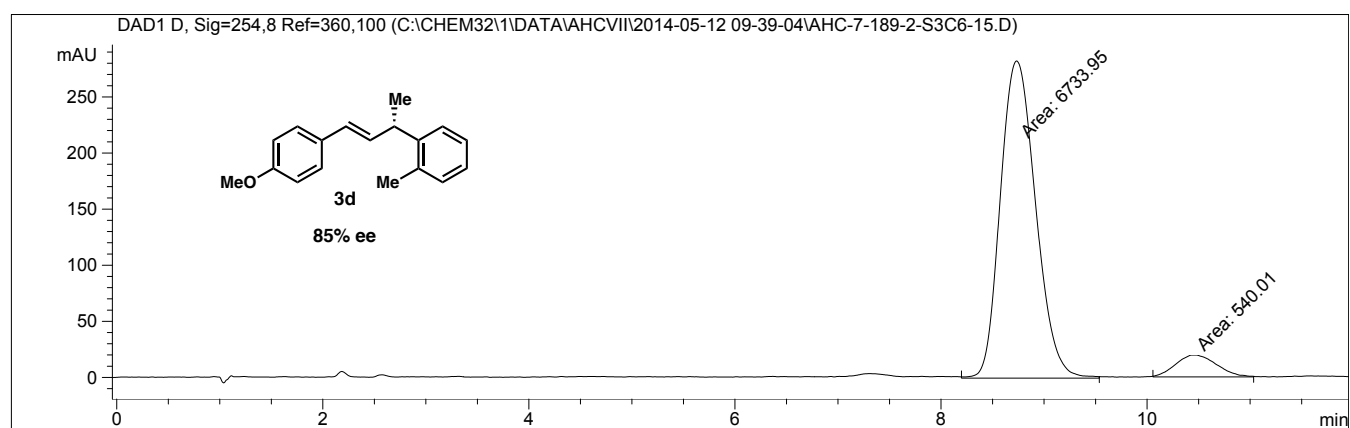

| Peak # | RetTime [min] | Type | Width [min] | Area [mAU*s] | Height [mAU] | Area %  |
|--------|---------------|------|-------------|--------------|--------------|---------|
| 1      | 8.734         | MM   | 0.3969      | 6733.94727   | 282.75232    | 92.5761 |
| 2      | 10.444        | MM   | 0.4602      | 540.01031    | 19.55776     | 7.4239  |

**3e (Table 2, entry 5): racemic**

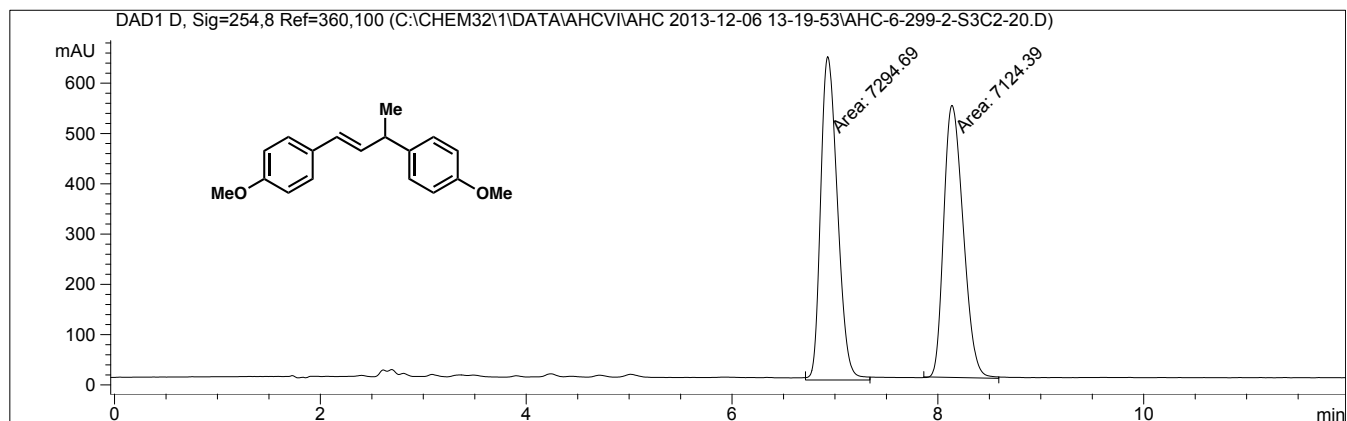

| Peak # | RetTime [min] | Type | Width [min] | Area [mAU*s] | Height [mAU] | Area %  |
|--------|---------------|------|-------------|--------------|--------------|---------|
| 1      | 6.930         | MM   | 0.1890      | 7294.69238   | 643.23810    | 50.5906 |
| 2      | 8.137         | MM   | 0.2193      | 7124.38721   | 541.33319    | 49.4094 |

**3e (Table 2, entry 5): enantioenriched, 93% ee**

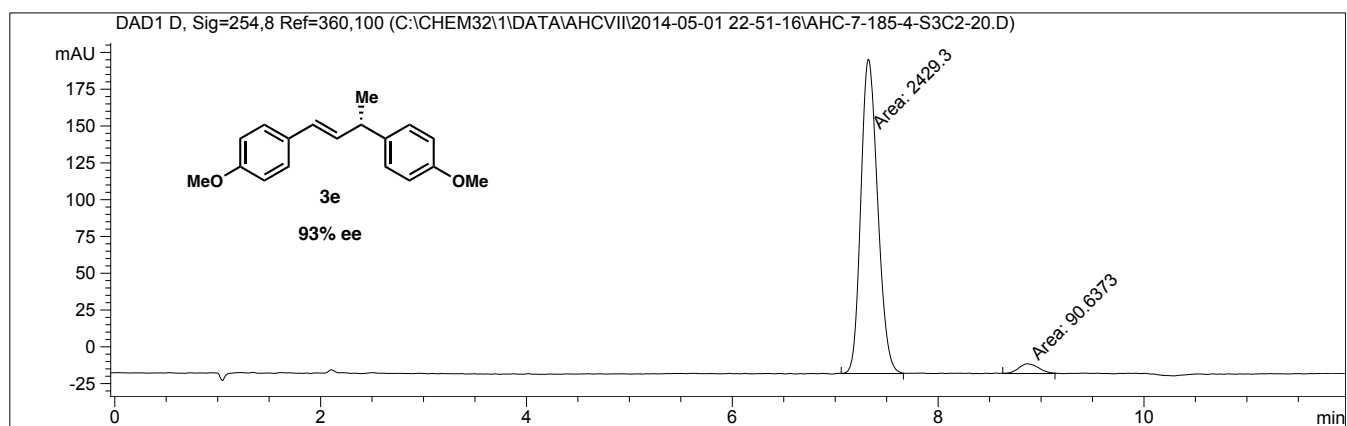

| Peak # | RetTime [min] | Type | Width [min] | Area [mAU*s] | Height [mAU] | Area %  |
|--------|---------------|------|-------------|--------------|--------------|---------|
| 1      | 7.323         | MM   | 0.1893      | 2429.29541   | 213.84731    | 96.4032 |
| 2      | 8.864         | MM   | 0.2287      | 90.63728     | 6.60611      | 3.5968  |

**3f (Table 2, entry 6): racemic**

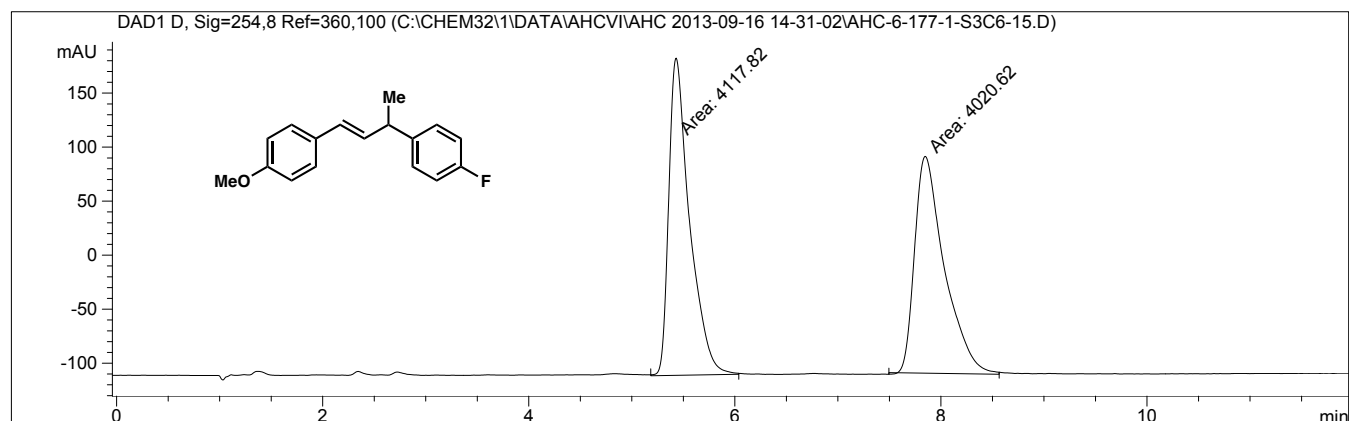

| Peak # | RetTime [min] | Type | Width [min] | Area [mAU*s] | Height [mAU] | Area %  |
|--------|---------------|------|-------------|--------------|--------------|---------|
| 1      | 5.429         | MM   | 0.2337      | 4117.82129   | 293.71591    | 50.5972 |
| 2      | 7.848         | MM   | 0.3339      | 4020.61816   | 200.69434    | 49.4028 |

**3f (Table 2, entry 6): enantioenriched, 89% ee**

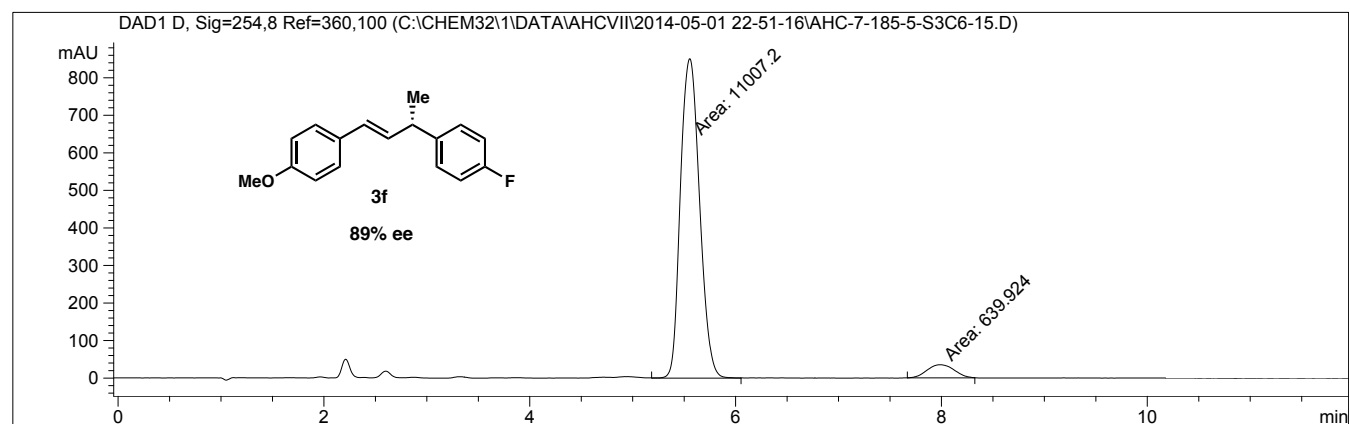

| Peak # | RetTime [min] | Type | Width [min] | Area [mAU*s] | Height [mAU] | Area %  |
|--------|---------------|------|-------------|--------------|--------------|---------|
| 1      | 5.554         | MM   | 0.2155      | 1.10072e4    | 851.35431    | 94.5057 |
| 2      | 7.988         | MM   | 0.3047      | 639.92358    | 34.99786     | 5.4943  |

**3g (Table 2, entry 7): racemic**

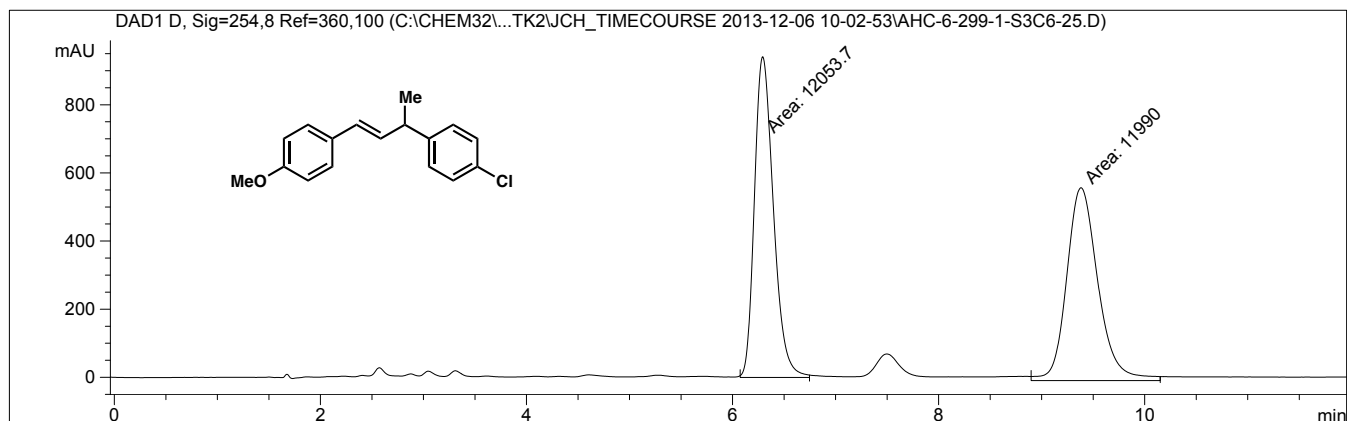

| Peak # | RetTime [min] | Type | Width [min] | Area [mAU*s] | Height [mAU] | Area %  |
|--------|---------------|------|-------------|--------------|--------------|---------|
| 1      | 6.292         | MM   | 0.2133      | 1.20537e4    | 941.72620    | 50.1325 |
| 2      | 9.381         | MM   | 0.3530      | 1.19900e4    | 566.09015    | 49.8675 |

**3g (Table 2, entry 7): enantioenriched, 88% ee**

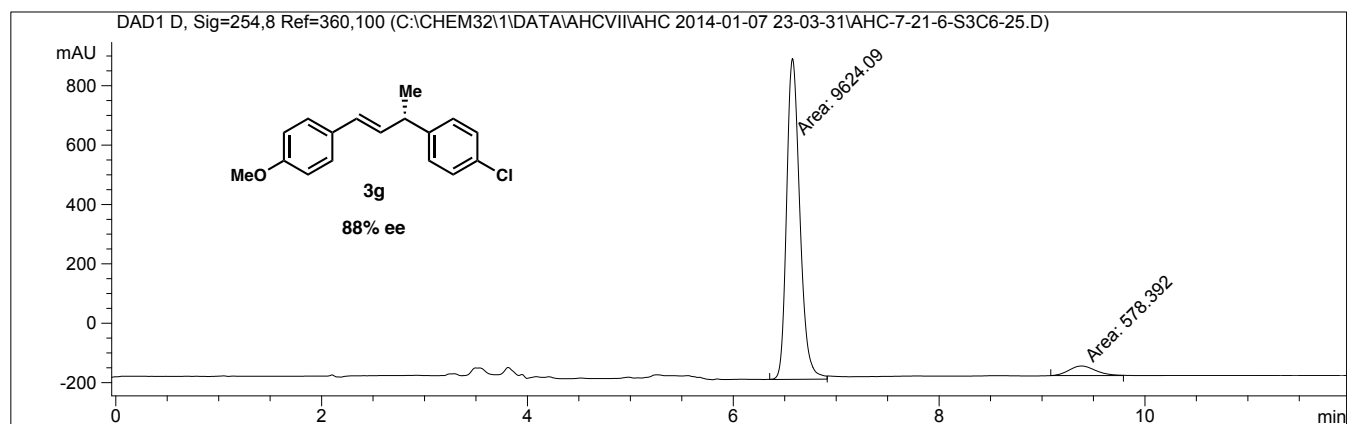

| Peak # | RetTime [min] | Type | Width [min] | Area [mAU*s] | Height [mAU] | Area %  |
|--------|---------------|------|-------------|--------------|--------------|---------|
| 1      | 6.575         | MM   | 0.1483      | 9624.08691   | 1081.90076   | 94.3309 |
| 2      | 9.384         | MM   | 0.2997      | 578.39185    | 32.16311     | 5.6691  |

**3h (Table 2, entry 8): racemic**

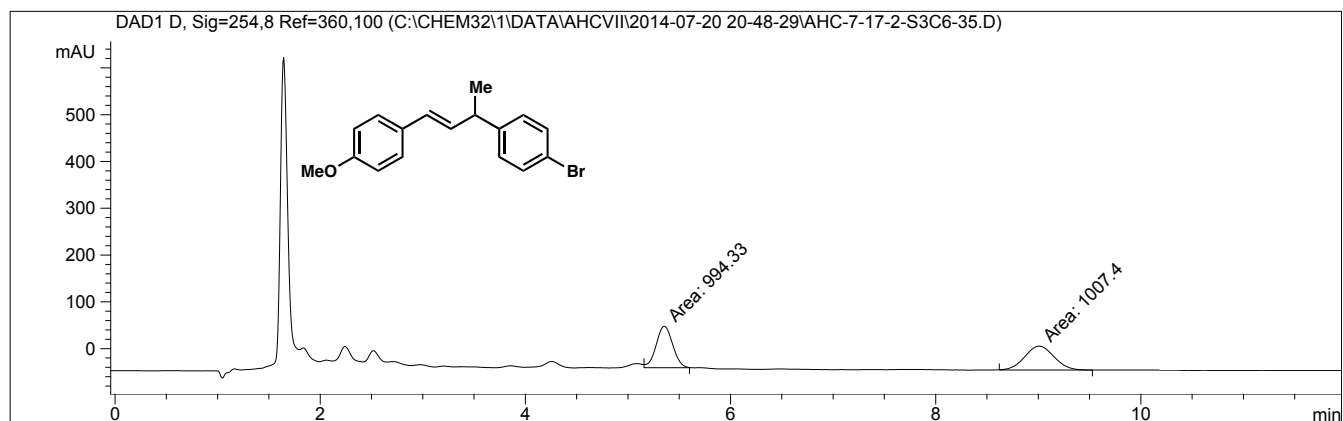

| Peak # | RetTime [min] | Type | Width [min] | Area [mAU*s] | Height [mAU] | Area %  |
|--------|---------------|------|-------------|--------------|--------------|---------|
| 1      | 5.354         | MM   | 0.1867      | 994.32965    | 88.77684     | 49.6736 |
| 2      | 9.010         | MM   | 0.3286      | 1007.39520   | 51.08786     | 50.3264 |

**3h (Table 2, entry 8): enantioenriched, 90% ee**

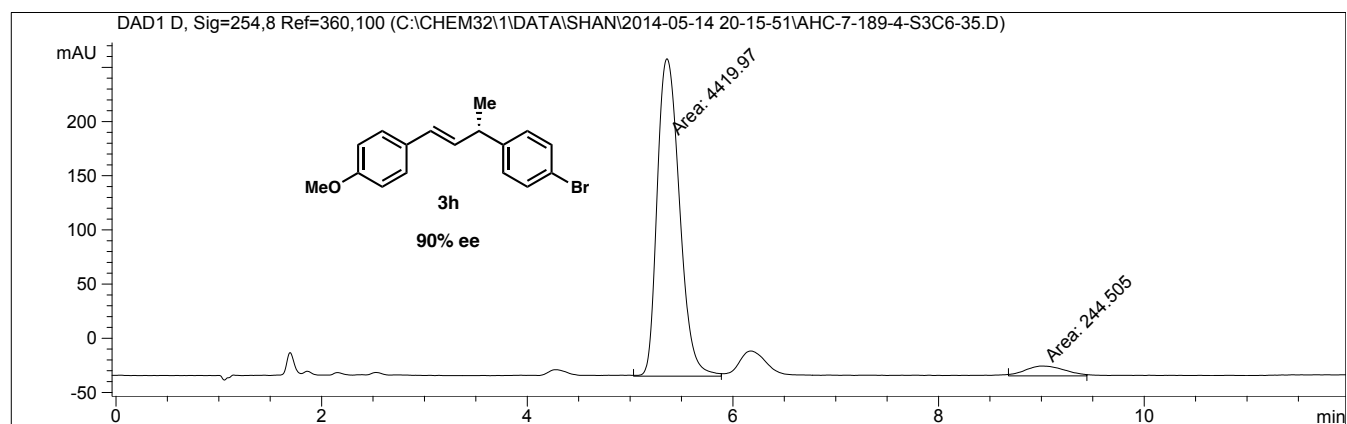

| Peak # | RetTime [min] | Type | Width [min] | Area [mAU*s] | Height [mAU] | Area %  |
|--------|---------------|------|-------------|--------------|--------------|---------|
| 1      | 5.359         | MM   | 0.2515      | 4419.97461   | 292.93845    | 94.7581 |
| 2      | 9.000         | MM   | 0.4463      | 244.50519    | 9.13001      | 5.2419  |

**3i (Table 2, entry 9): racemic**

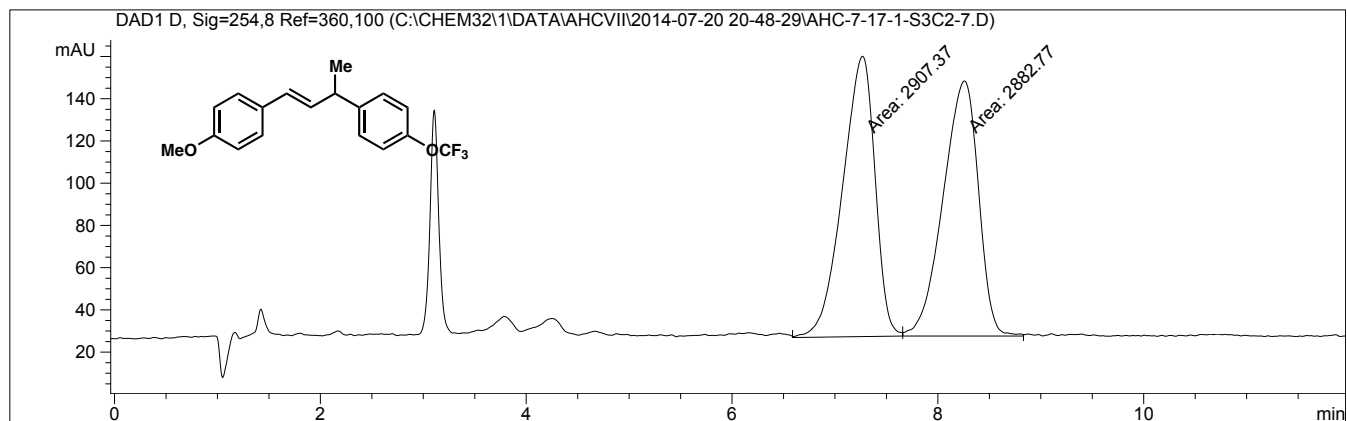

**3i (Table 2, entry 9): enantioenriched, 88% ee**

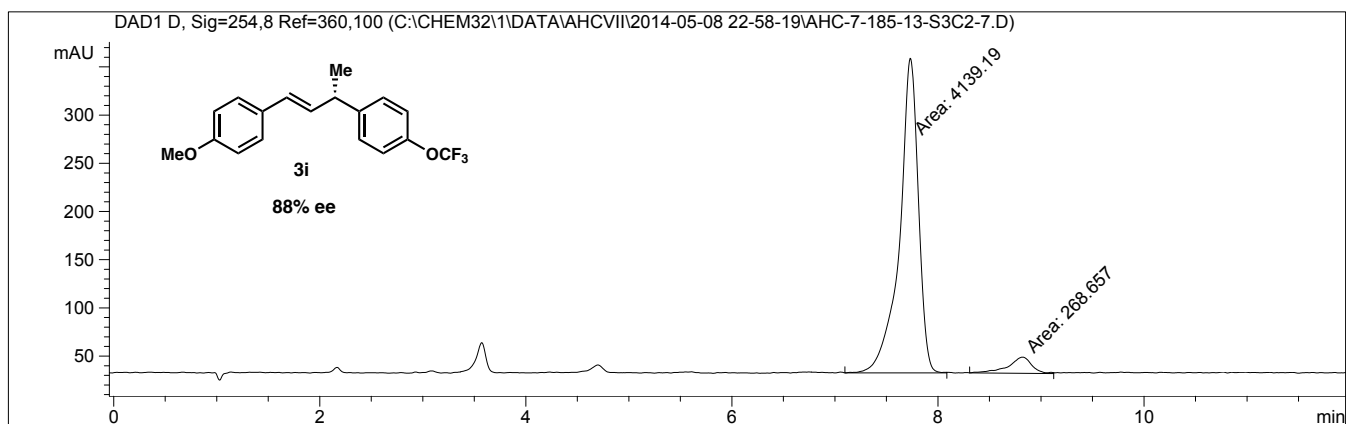



**3j (Table 2, entry 10): racemic**

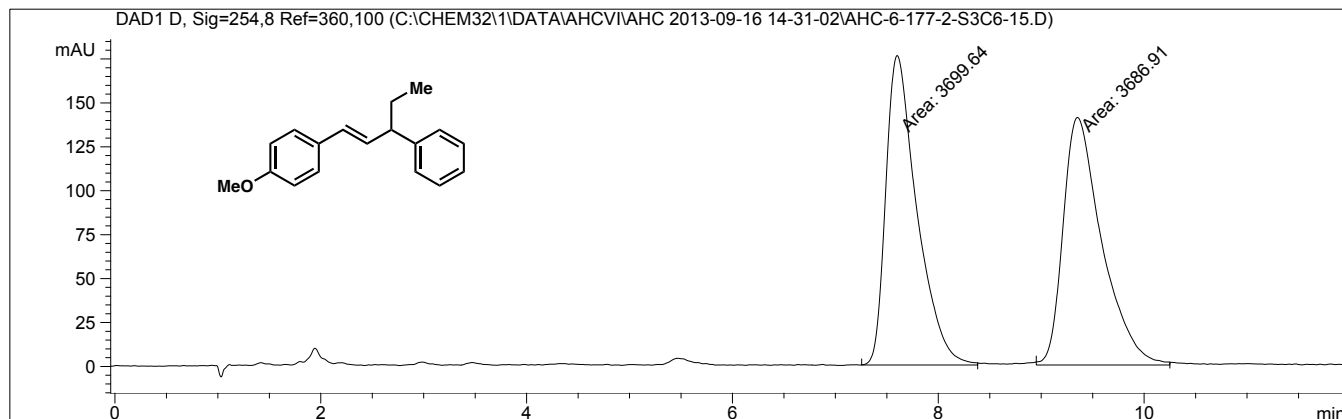

| Peak # | RetTime [min] | Type | Width [min] | Area [mAU*s] | Height [mAU] | Area %  |
|--------|---------------|------|-------------|--------------|--------------|---------|
| 1      | 7.600         | MM   | 0.3500      | 3699.64233   | 176.16603    | 50.0862 |
| 2      | 9.352         | MM   | 0.4361      | 3686.90503   | 140.91353    | 49.9138 |

**3j (Table 2, entry 10): enantioenriched, 97% ee**

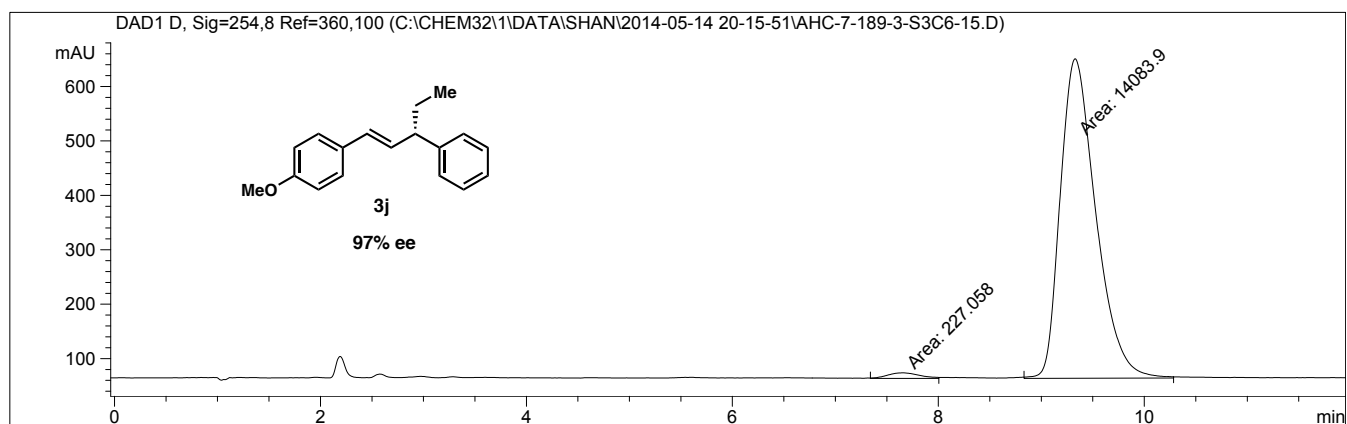

| Peak # | RetTime [min] | Type | Width [min] | Area [mAU*s] | Height [mAU] | Area %  |
|--------|---------------|------|-------------|--------------|--------------|---------|
| 1      | 7.659         | MM   | 0.3658      | 227.05769    | 10.34652     | 1.5866  |
| 2      | 9.329         | MM   | 0.3998      | 1.40839e4    | 587.16370    | 98.4134 |

**3k (Table 2, entry 11): racemic**

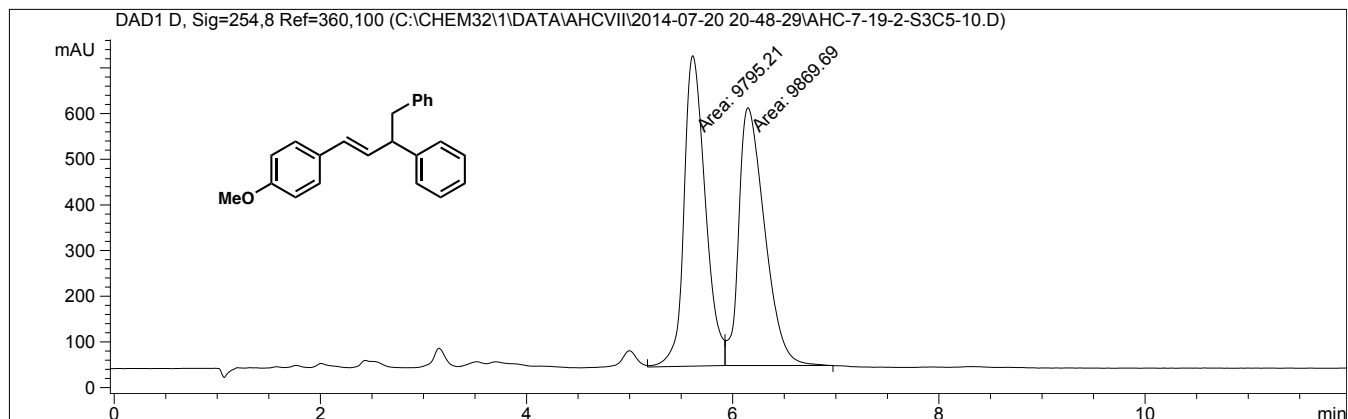

| Peak # | RetTime [min] | Type | Width [min] | Area [mAU*s] | Height [mAU] | Area %  |
|--------|---------------|------|-------------|--------------|--------------|---------|
| 1      | 5.612         | MM   | 0.2400      | 9795.21289   | 680.30035    | 49.8106 |
| 2      | 6.148         | MM   | 0.2913      | 9869.69043   | 564.75275    | 50.1894 |

**3k (Table 2, entry 11): enantioenriched, 93% ee**

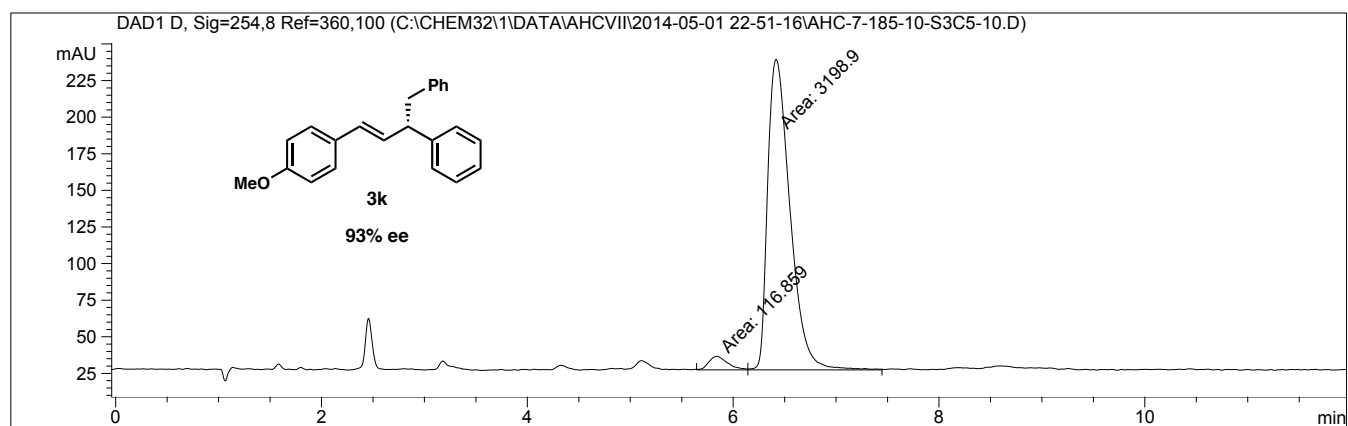

| Peak # | RetTime [min] | Type | Width [min] | Area [mAU*s] | Height [mAU] | Area %  |
|--------|---------------|------|-------------|--------------|--------------|---------|
| 1      | 5.843         | MM   | 0.2131      | 116.85924    | 9.14146      | 3.5244  |
| 2      | 6.416         | MM   | 0.2513      | 3198.90405   | 212.16275    | 96.4756 |

**3I (Table 2, entry 12): racemic**

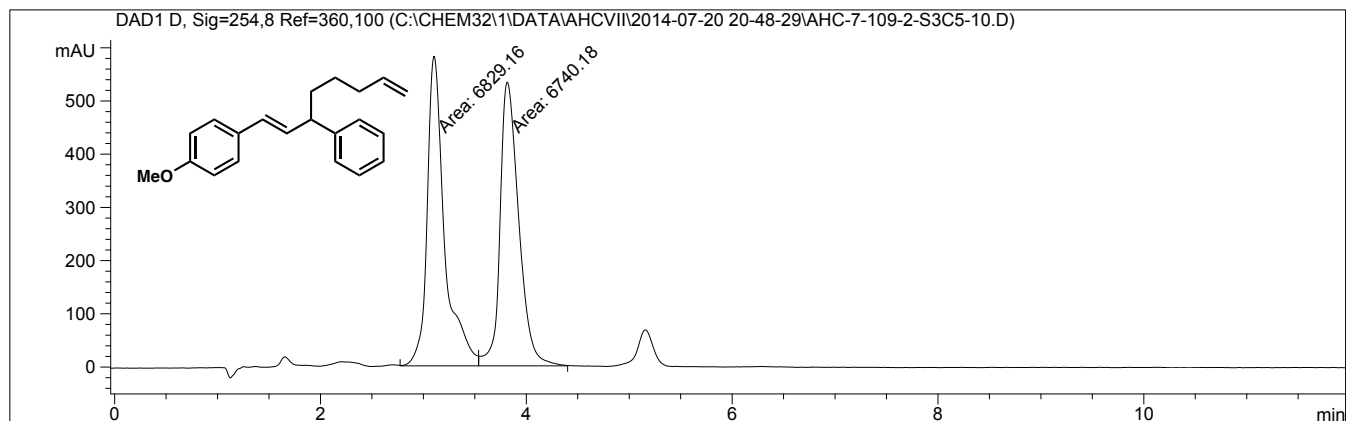

| Peak # | RetTime [min] | Type | Width [min] | Area [mAU*s] | Height [mAU] | Area %  |
|--------|---------------|------|-------------|--------------|--------------|---------|
| 1      | 3.104         | MM   | 0.1953      | 6829.15918   | 582.89142    | 50.3279 |
| 2      | 3.815         | MM   | 0.2105      | 6740.18213   | 533.69666    | 49.6721 |

**3I (Table 2, entry 12): enantioenriched, 94% ee**

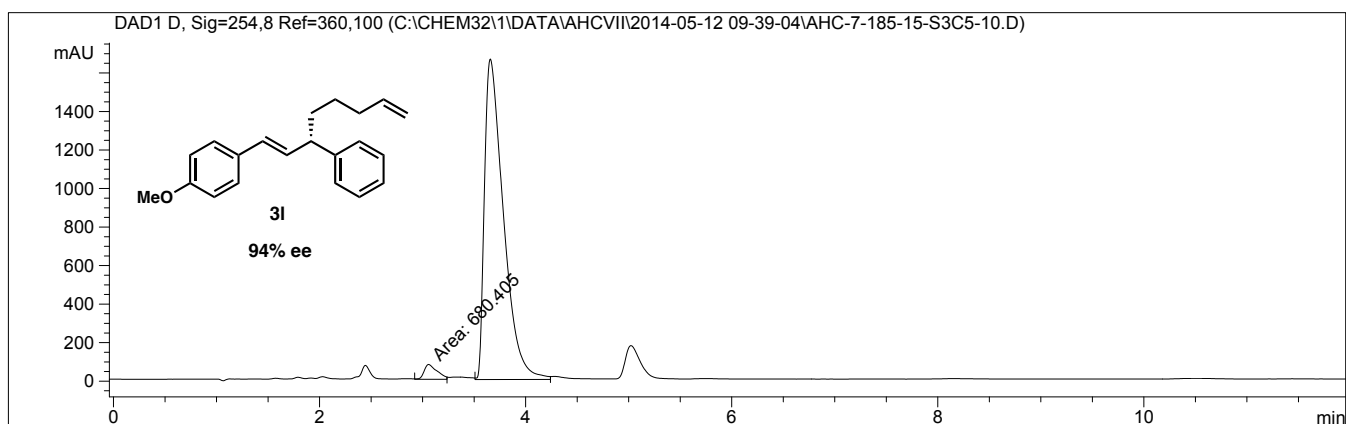

| Peak # | RetTime [min] | Type | Width [min] | Area [mAU*s] | Height [mAU] | Area %  |
|--------|---------------|------|-------------|--------------|--------------|---------|
| 1      | 3.058         | MM   | 0.1470      | 680.40527    | 77.13821     | 3.0921  |
| 2      | 3.659         | VV   | 0.1956      | 2.13239e4    | 1663.29028   | 96.9079 |

**3m (Table 2, entry 13): racemic**

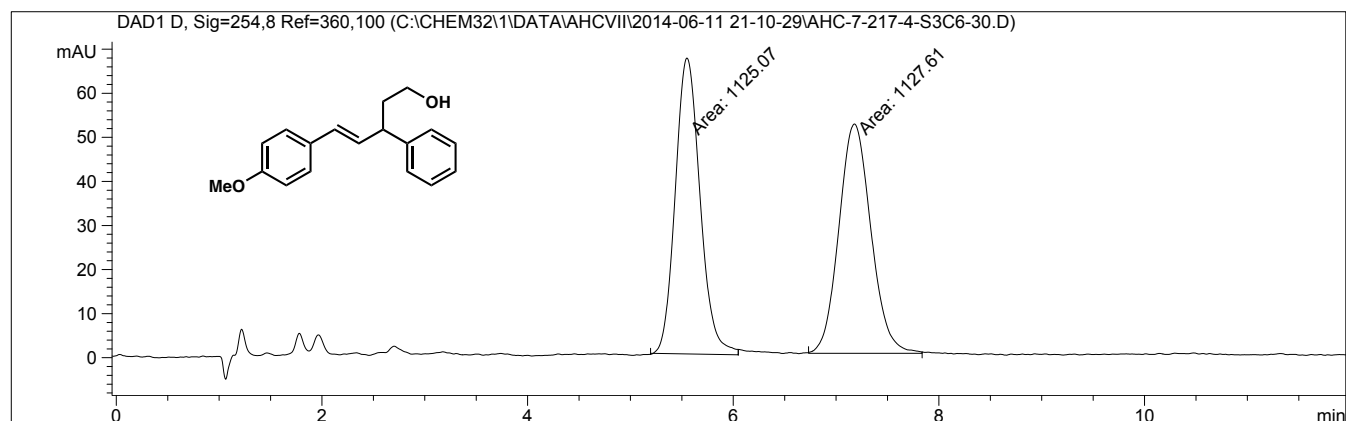

| Peak # | RetTime [min] | Type | Width [min] | Area [mAU*s] | Height [mAU] | Area %  |
|--------|---------------|------|-------------|--------------|--------------|---------|
| 1      | 5.549         | MM   | 0.2793      | 1125.06787   | 67.14302     | 49.9435 |
| 2      | 7.178         | MM   | 0.3612      | 1127.61450   | 52.03247     | 50.0565 |

**3m (Table 2, entry 13): enantioenriched, 96% ee**

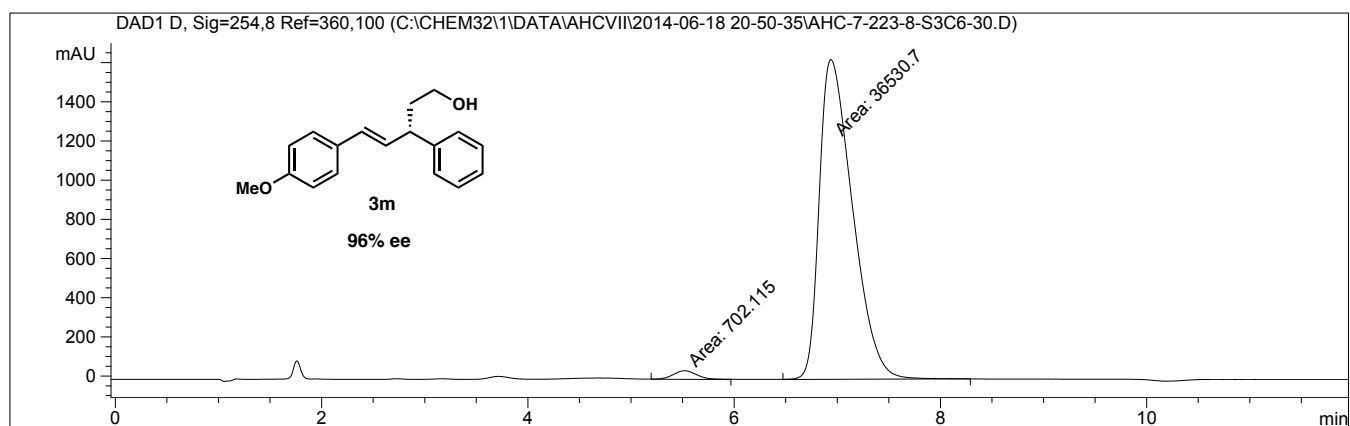

| Peak # | RetTime [min] | Type | Width [min] | Area [mAU*s] | Height [mAU] | Area %  |
|--------|---------------|------|-------------|--------------|--------------|---------|
| 1      | 5.519         | MM   | 0.2665      | 702.11481    | 43.90331     | 1.8857  |
| 2      | 6.938         | MM   | 0.3729      | 3.65307e4    | 1632.66406   | 98.1143 |

**3n (Table 2, entry 14): racemic**

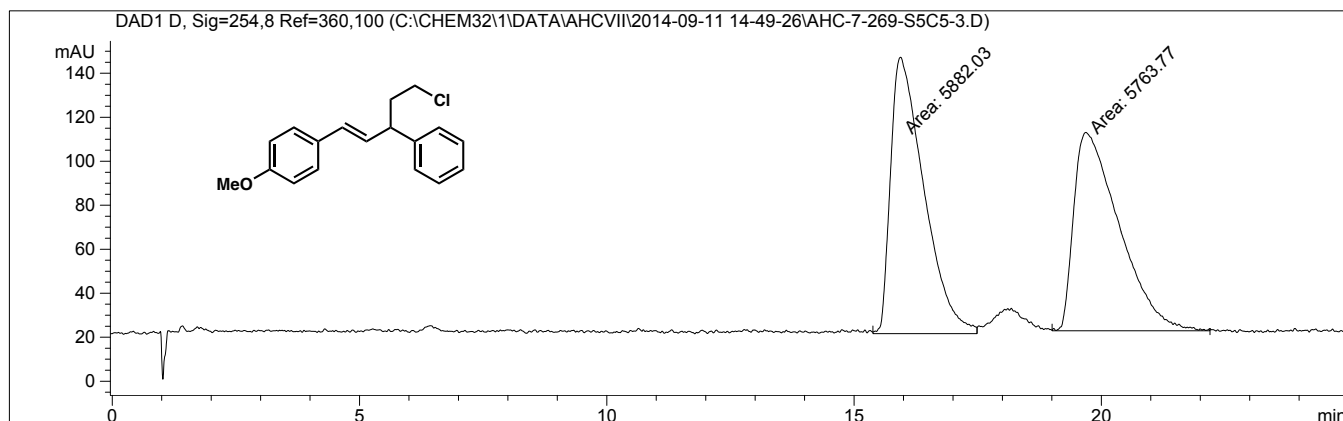

| Peak # | RetTime [min] | Type | Width [min] | Area [mAU*s] | Height [mAU] | Area %  |
|--------|---------------|------|-------------|--------------|--------------|---------|
| 1      | 15.941        | MM   | 0.7802      | 5882.02979   | 125.65482    | 50.5077 |
| 2      | 19.687        | MM   | 1.0651      | 5763.77490   | 90.19390     | 49.4923 |

**3n (Table 2, entry 14): enantioenriched, 94% ee**

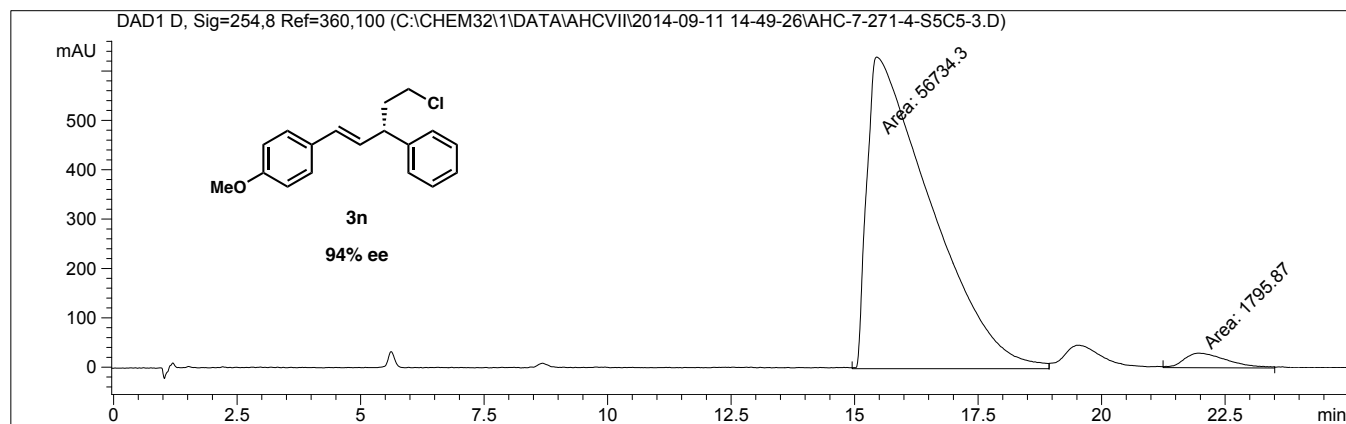

| Peak # | RetTime [min] | Type | Width [min] | Area [mAU*s] | Height [mAU] | Area %  |
|--------|---------------|------|-------------|--------------|--------------|---------|
| 1      | 15.449        | MM   | 1.4976      | 5.67343e4    | 631.38782    | 96.9317 |
| 2      | 21.994        | MM   | 1.0162      | 1795.87158   | 29.45459     | 3.0683  |

**5a (Table 3, entry 1): racemic**

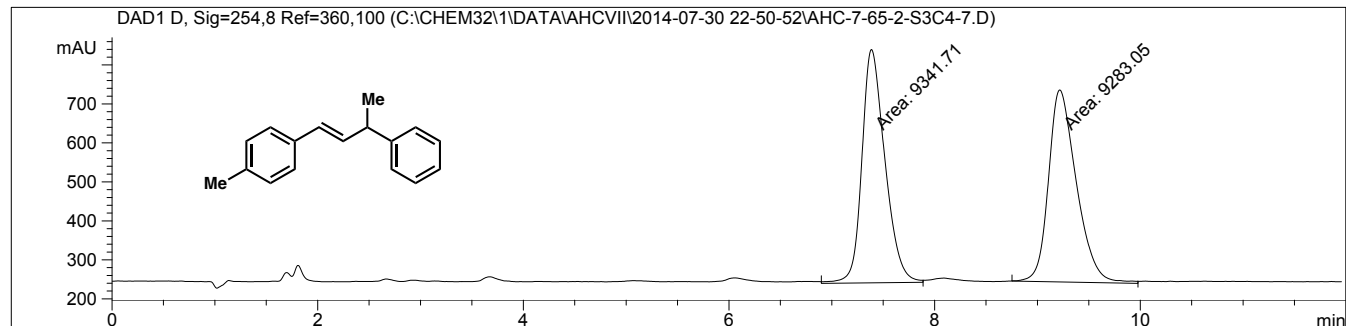

| Peak # | RetTime [min] | Type | Width [min] | Area [mAU*s] | Height [mAU] | Area %  |
|--------|---------------|------|-------------|--------------|--------------|---------|
| 1      | 7.386         | MM   | 0.2600      | 9341.71094   | 598.85675    | 50.1575 |
| 2      | 9.217         | MM   | 0.3140      | 9283.04590   | 492.80606    | 49.8425 |

**5a (Table 3, entry 1): enantioenriched, 96% ee**

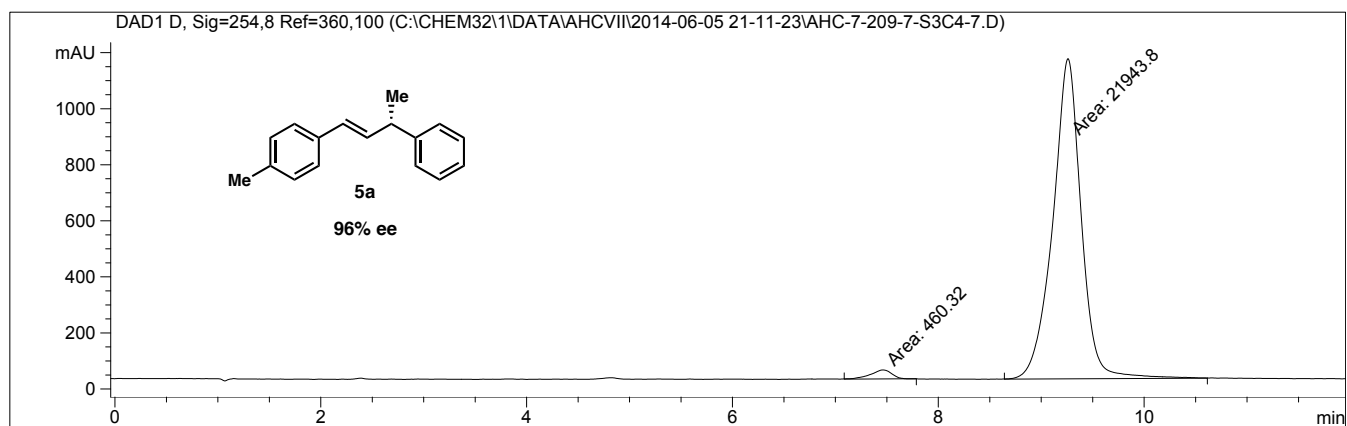

| Peak # | RetTime [min] | Type | Width [min] | Area [mAU*s] | Height [mAU] | Area %  |
|--------|---------------|------|-------------|--------------|--------------|---------|
| 1      | 7.461         | MM   | 0.2411      | 460.31961    | 31.82347     | 2.0546  |
| 2      | 9.260         | MM   | 0.3201      | 2.19438e4    | 1142.71289   | 97.9454 |

**5b (Table 3, entry 2): racemic**

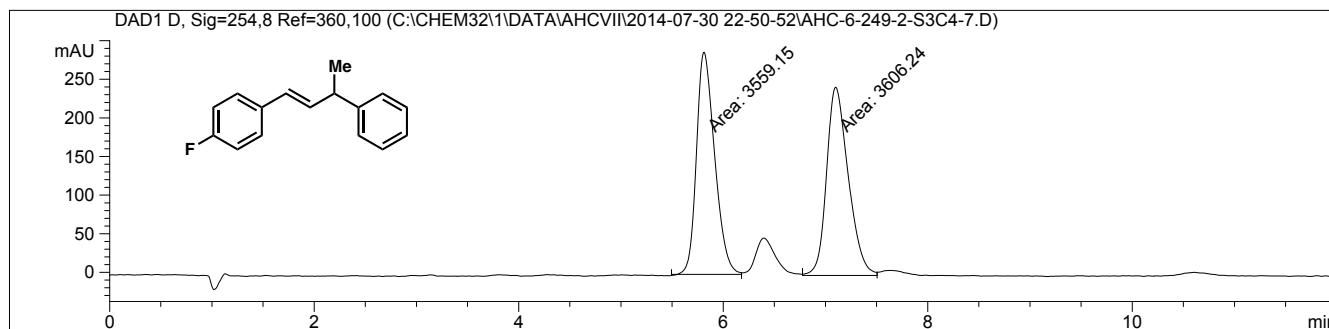

| Peak # | RetTime [min] | Type | Width [min] | Area [mAU*s] | Height [mAU] | Area %  |
|--------|---------------|------|-------------|--------------|--------------|---------|
| 1      | 5.812         | MM   | 0.2061      | 3559.15161   | 287.79590    | 49.6714 |
| 2      | 7.099         | MM   | 0.2464      | 3606.24365   | 243.90446    | 50.3286 |

**5b (Table 3, entry 2): enantioenriched, 94% ee**

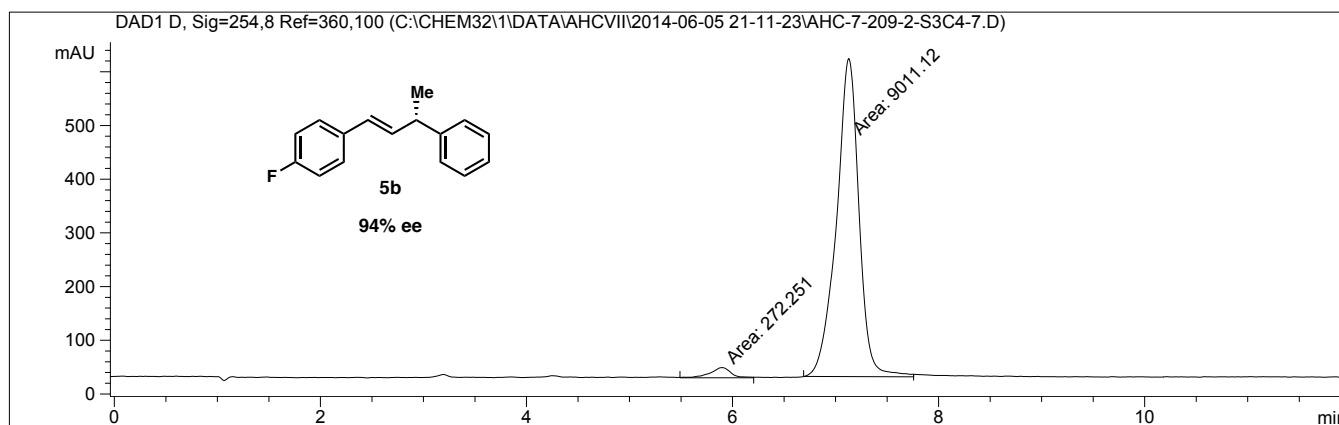

| Peak # | RetTime [min] | Type | Width [min] | Area [mAU*s] | Height [mAU] | Area %  |
|--------|---------------|------|-------------|--------------|--------------|---------|
| 1      | 5.899         | MM   | 0.2386      | 272.25067    | 19.01509     | 2.9327  |
| 2      | 7.128         | MM   | 0.2536      | 9011.11523   | 592.32813    | 97.0673 |

**5c (Table 3, entry 3): racemic**

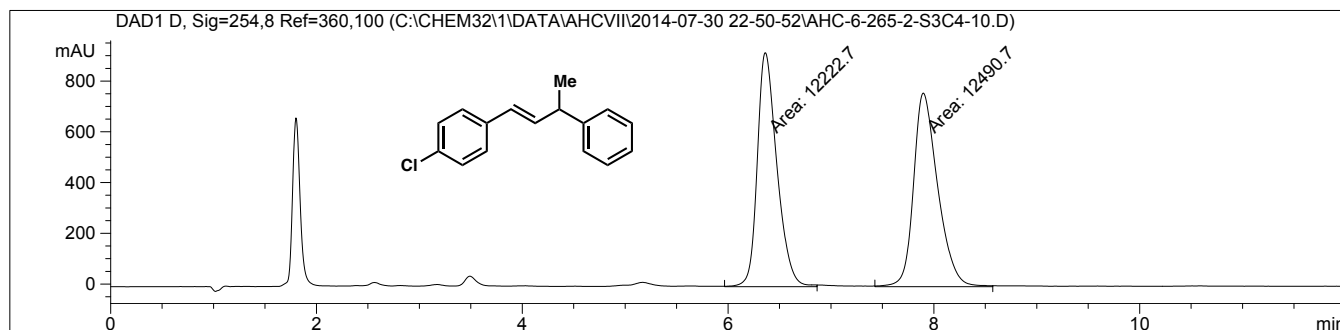

| Peak # | RetTime [min] | Type | Width [min] | Area [mAU*s] | Height [mAU] | Area %  |
|--------|---------------|------|-------------|--------------|--------------|---------|
| 1      | 6.362         | MM   | 0.2207      | 1.22227e4    | 922.92114    | 49.4580 |
| 2      | 7.898         | MM   | 0.2727      | 1.24907e4    | 763.51147    | 50.5420 |

**5c (Table 3, entry 3): enantioenriched, 95% ee**

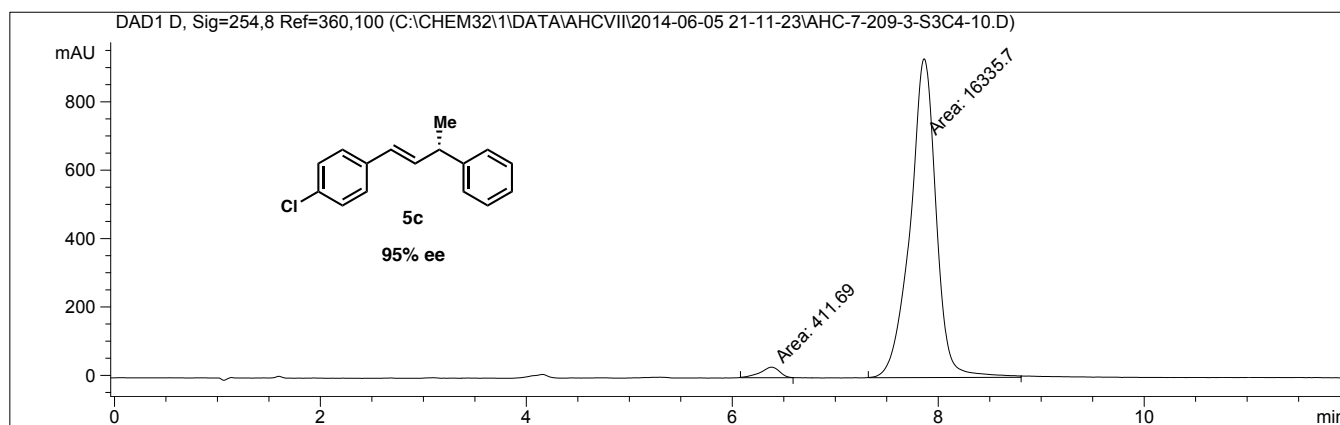

| Peak # | RetTime [min] | Type | Width [min] | Area [mAU*s] | Height [mAU] | Area %  |
|--------|---------------|------|-------------|--------------|--------------|---------|
| 1      | 6.381         | MM   | 0.2204      | 411.68973    | 31.13871     | 2.4582  |
| 2      | 7.864         | MM   | 0.2918      | 1.63357e4    | 932.91962    | 97.5418 |



**5d (Table 3, entry 4): racemic**

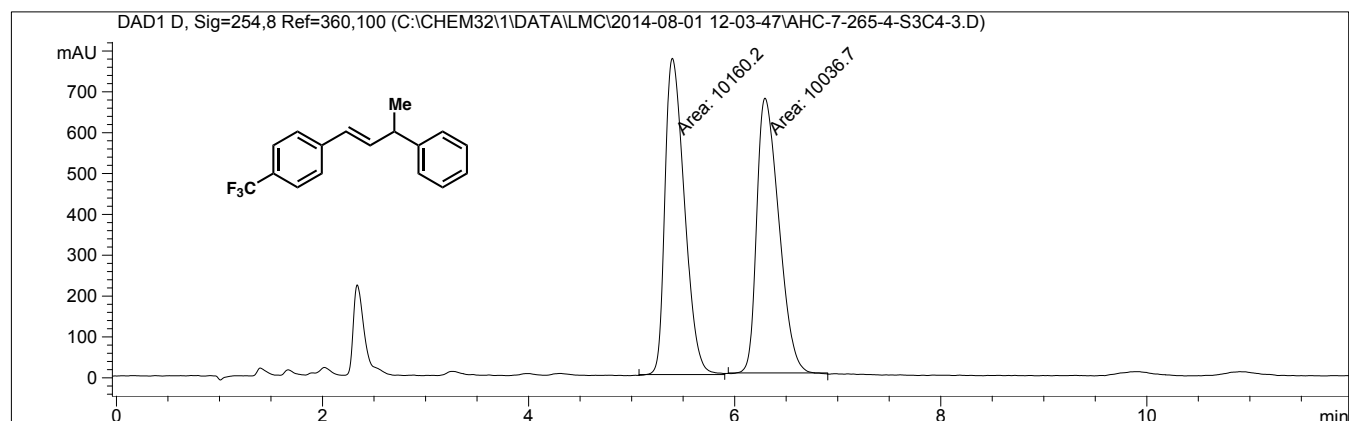

| Peak # | RetTime [min] | Type | Width [min] | Area [mAU*s] | Height [mAU] | Area %  |
|--------|---------------|------|-------------|--------------|--------------|---------|
| 1      | 5.395         | MM   | 0.2185      | 1.01602e4    | 774.91656    | 50.3057 |
| 2      | 6.295         | MM   | 0.2484      | 1.00367e4    | 673.30627    | 49.6943 |

**5d (Table 3, entry 4): enantioenriched, 94% ee**

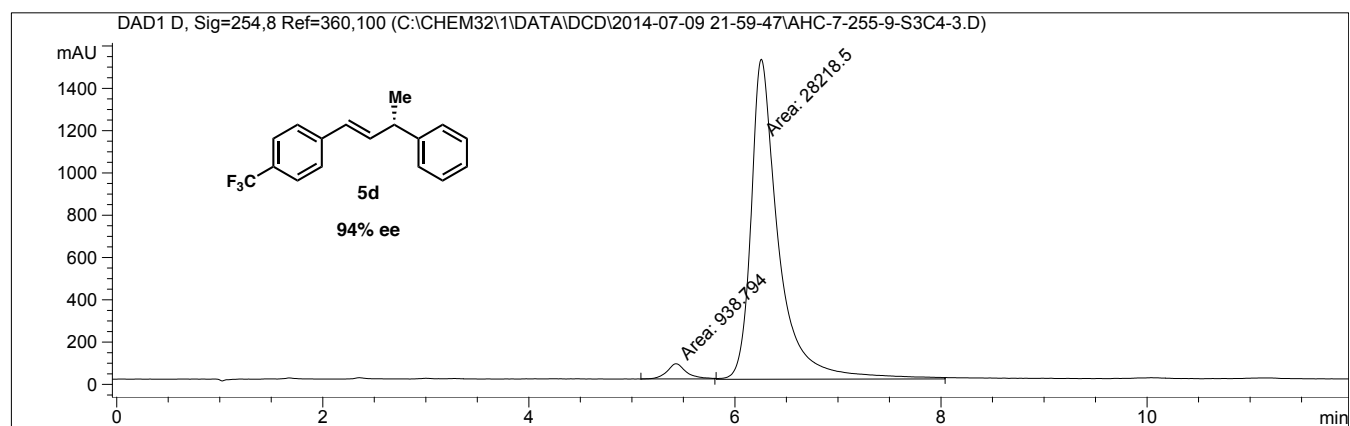

| Peak # | RetTime [min] | Type | Width [min] | Area [mAU*s] | Height [mAU] | Area %  |
|--------|---------------|------|-------------|--------------|--------------|---------|
| 1      | 5.428         | MM   | 0.2175      | 938.79395    | 71.92260     | 3.2198  |
| 2      | 6.256         | MM   | 0.3107      | 2.82185e4    | 1513.67834   | 96.7802 |

**5e (Table 3, entry 5): racemic**

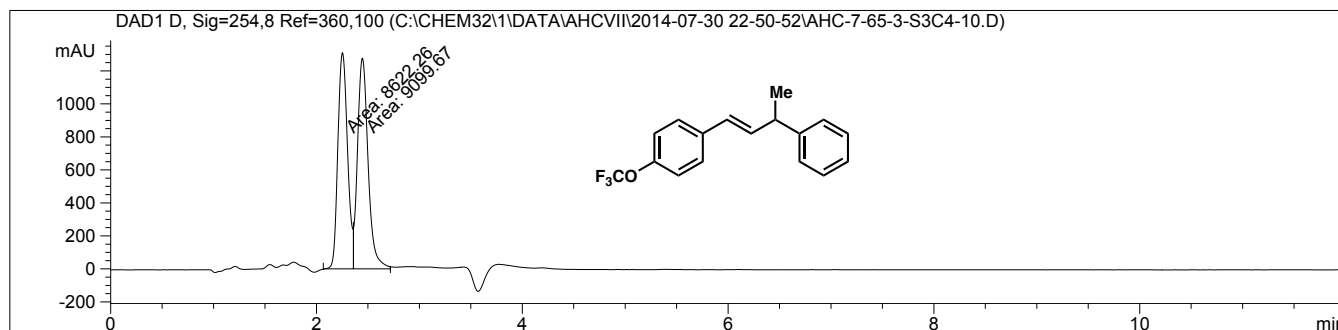

| Peak # | RetTime [min] | Type | Width [min] | Area [mAU*s] | Height [mAU] | Area %  |
|--------|---------------|------|-------------|--------------|--------------|---------|
| 1      | 2.252         | MM   | 0.1095      | 8622.25586   | 1312.58875   | 48.6531 |
| 2      | 2.446         | MM   | 0.1185      | 9099.66504   | 1279.80774   | 51.3469 |

**5e (Table 3, entry 5): enantioenriched, 94% ee**

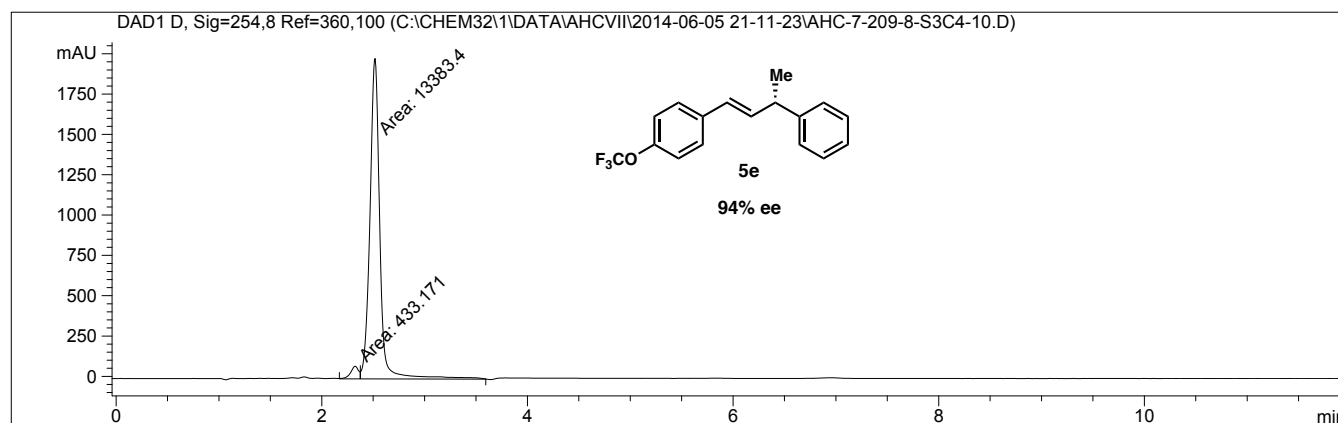

| Peak # | RetTime [min] | Type | Width [min] | Area [mAU*s] | Height [mAU] | Area %  |
|--------|---------------|------|-------------|--------------|--------------|---------|
| 1      | 2.324         | MM   | 0.0917      | 433.17111    | 78.69621     | 3.1352  |
| 2      | 2.517         | MM   | 0.1119      | 1.33834e4    | 1993.22083   | 96.8648 |

**5f (Table 3, entry 6): racemic**

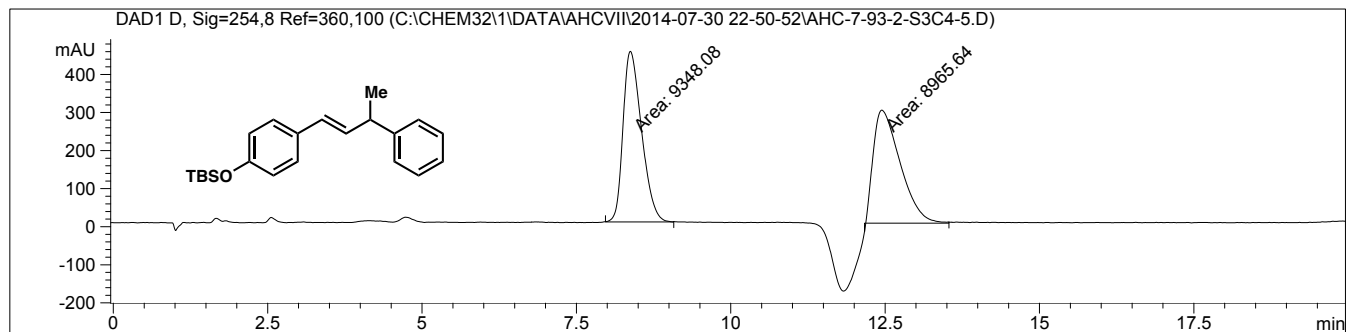

| Peak # | RetTime [min] | Type | Width [min] | Area [mAU*s] | Height [mAU] | Area %  |
|--------|---------------|------|-------------|--------------|--------------|---------|
| 1      | 8.373         | MM   | 0.3477      | 9348.08398   | 448.07748    | 51.0442 |
| 2      | 12.445        | MM   | 0.5034      | 8965.63672   | 296.82007    | 48.9558 |

**5f (Table 3, entry 6): enantioenriched, 96% ee**

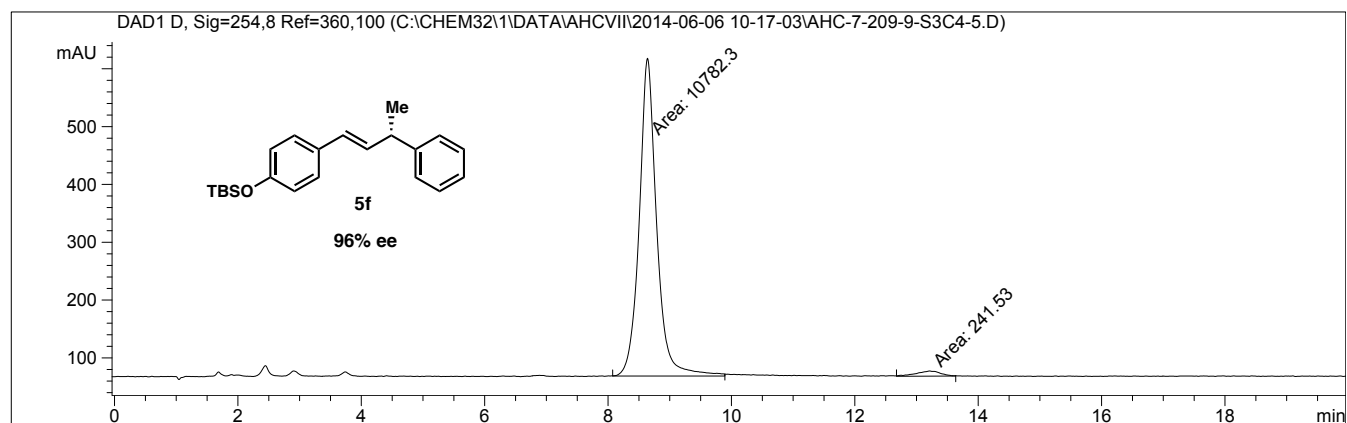

| Peak # | RetTime [min] | Type | Width [min] | Area [mAU*s] | Height [mAU] | Area %  |
|--------|---------------|------|-------------|--------------|--------------|---------|
| 1      | 8.638         | MM   | 0.3270      | 1.07823e4    | 549.47449    | 97.8090 |
| 2      | 13.210        | MM   | 0.4557      | 241.52989    | 8.83361      | 2.1910  |

**5g (Table 3, entry 7): racemic**

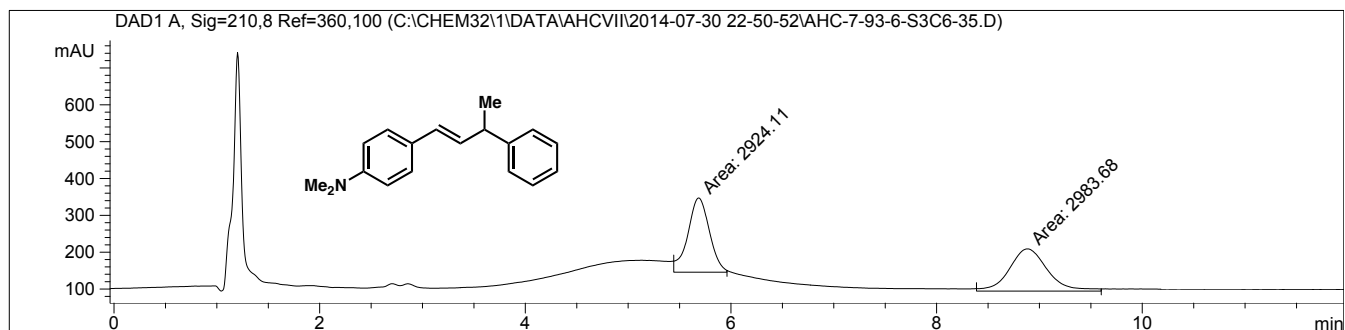

| Peak # | RetTime [min] | Type | Width [min] | Area [mAU*s] | Height [mAU] | Area %  |
|--------|---------------|------|-------------|--------------|--------------|---------|
| 1      | 5.686         | MM   | 0.2419      | 2924.10986   | 201.49109    | 49.4958 |
| 2      | 8.884         | MM   | 0.4337      | 2983.68335   | 114.67265    | 50.5042 |

**5g (Table 3, entry 7): enantioenriched, 95% ee**

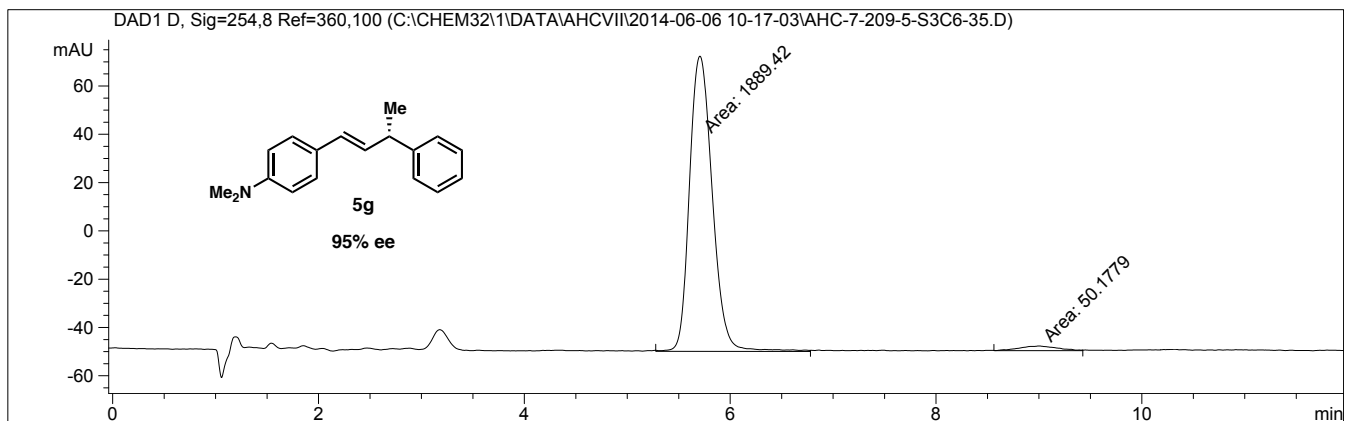

| Peak # | RetTime [min] | Type | Width [min] | Area [mAU*s] | Height [mAU] | Area %  |
|--------|---------------|------|-------------|--------------|--------------|---------|
| 1      | 5.706         | MM   | 0.2574      | 1889.41882   | 122.31673    | 97.4130 |
| 2      | 9.005         | MM   | 0.4300      | 50.17793     | 1.94500      | 2.5870  |

**5h (Table 3, entry 8): racemic**

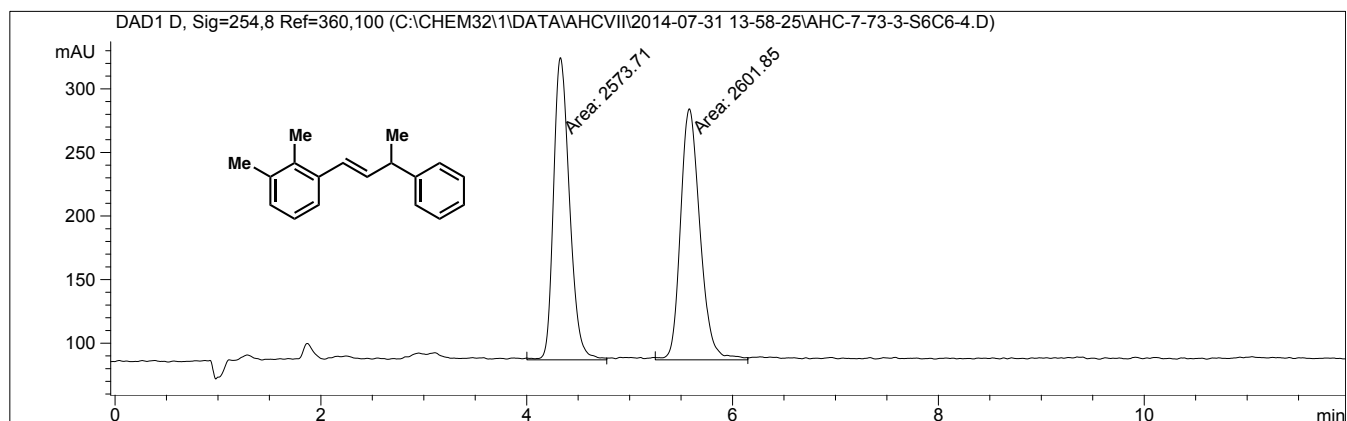

| Peak # | RetTime [min] | Type | Width [min] | Area [mAU*s] | Height [mAU] | Area %  |
|--------|---------------|------|-------------|--------------|--------------|---------|
| 1      | 4.327         | MM   | 0.1803      | 2573.70605   | 237.87602    | 49.7281 |
| 2      | 5.579         | MM   | 0.2195      | 2601.85254   | 197.58577    | 50.2719 |

**5h (Table 3, entry 8): enantioenriched, 96% ee**

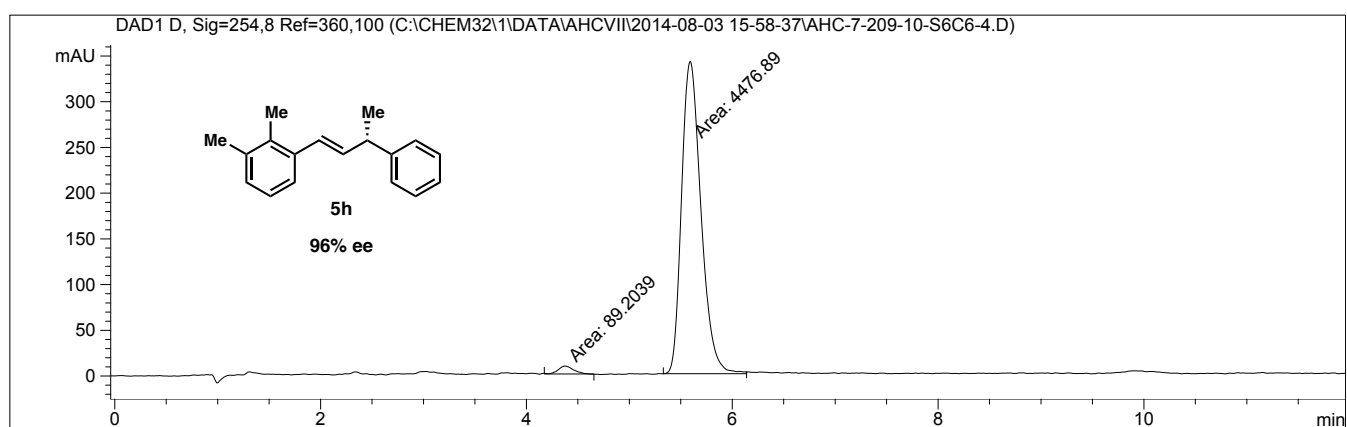

| Peak # | RetTime [min] | Type | Width [min] | Area [mAU*s] | Height [mAU] | Area %  |
|--------|---------------|------|-------------|--------------|--------------|---------|
| 1      | 4.374         | MM   | 0.1704      | 89.20393     | 8.72473      | 1.9536  |
| 2      | 5.590         | MM   | 0.2184      | 4476.88916   | 341.59937    | 98.0464 |

**5i (Table 3, entry 9): racemic**

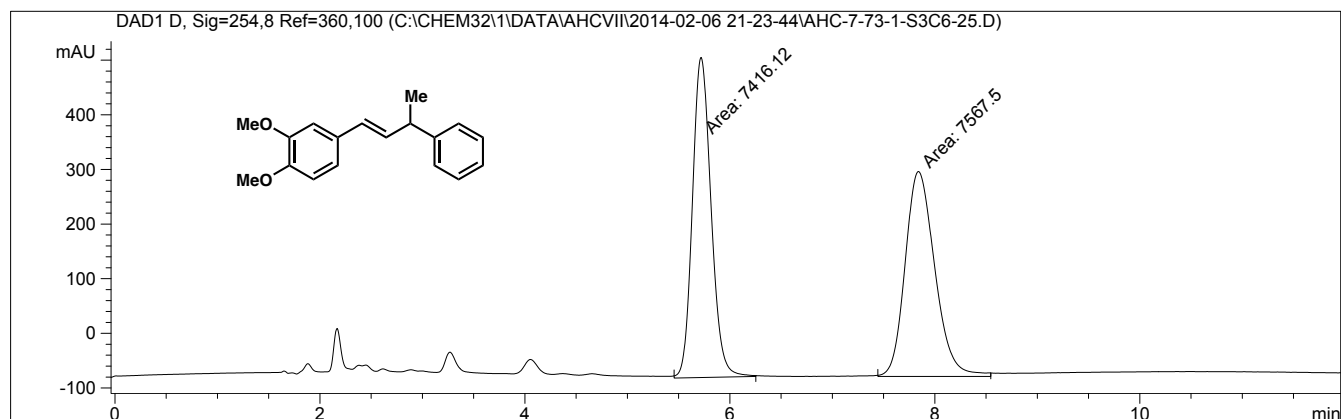

| Peak # | RetTime [min] | Type | Width [min] | Area [mAU*s] | Height [mAU] | Area %  |
|--------|---------------|------|-------------|--------------|--------------|---------|
| 1      | 5.719         | MM   | 0.2109      | 7416.11523   | 586.16187    | 49.4948 |
| 2      | 7.839         | MM   | 0.3362      | 7567.49658   | 375.18320    | 50.5052 |

**5i (Table 3, entry 9): enantioenriched, 95% ee**

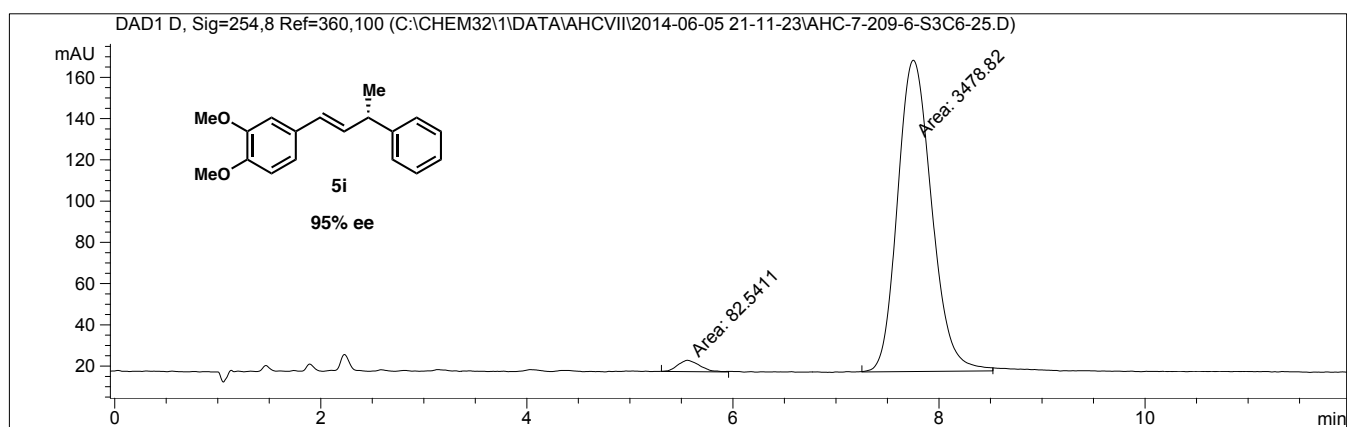

| Peak # | RetTime [min] | Type | Width [min] | Area [mAU*s] | Height [mAU] | Area %  |
|--------|---------------|------|-------------|--------------|--------------|---------|
| 1      | 5.558         | MM   | 0.2489      | 82.54113     | 5.52799      | 2.3177  |
| 2      | 7.751         | MM   | 0.3840      | 3478.81641   | 150.97183    | 97.6823 |

**5j (Table 3, entry 10): racemic**

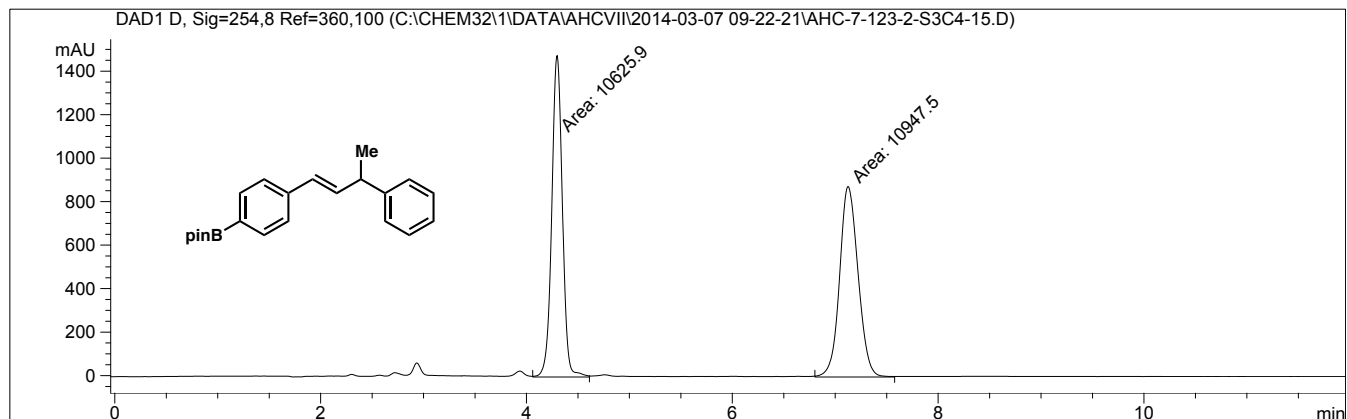

| Peak # | RetTime [min] | Type | Width [min] | Area [mAU*s] | Height [mAU] | Area %  |
|--------|---------------|------|-------------|--------------|--------------|---------|
| 1      | 4.297         | MM   | 0.1195      | 1.06259e4    | 1481.47107   | 49.2547 |
| 2      | 7.125         | MM   | 0.2081      | 1.09475e4    | 876.78436    | 50.7453 |

**5j (Table 3, entry 10): enantioenriched, 94% ee**

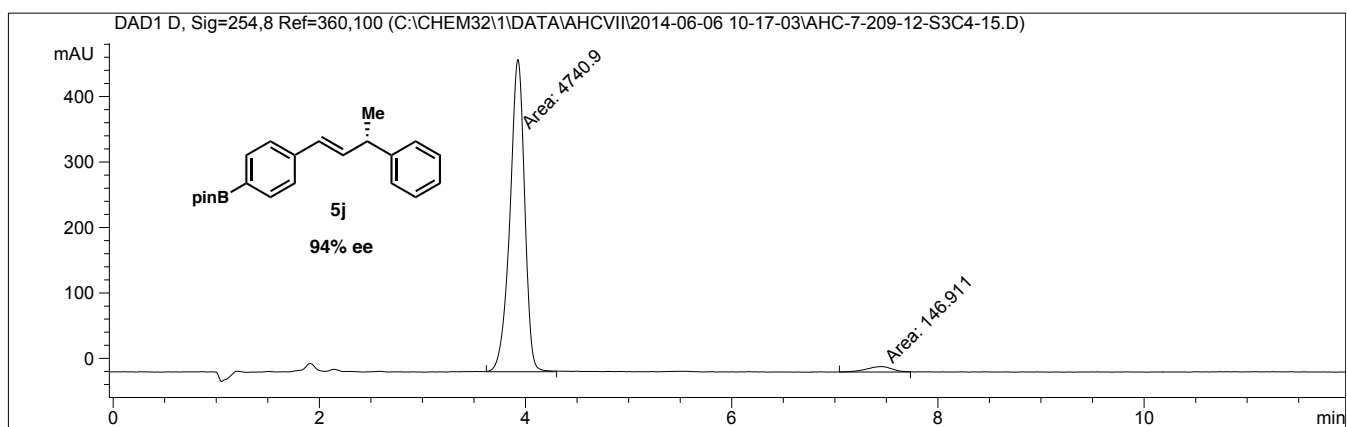

| Peak # | RetTime [min] | Type | Width [min] | Area [mAU*s] | Height [mAU] | Area %  |
|--------|---------------|------|-------------|--------------|--------------|---------|
| 1      | 3.926         | MM   | 0.1654      | 4740.90332   | 477.81689    | 96.9943 |
| 2      | 7.451         | MM   | 0.2946      | 146.91095    | 8.30996      | 3.0057  |

**5k (Table 3, entry 11): racemic**

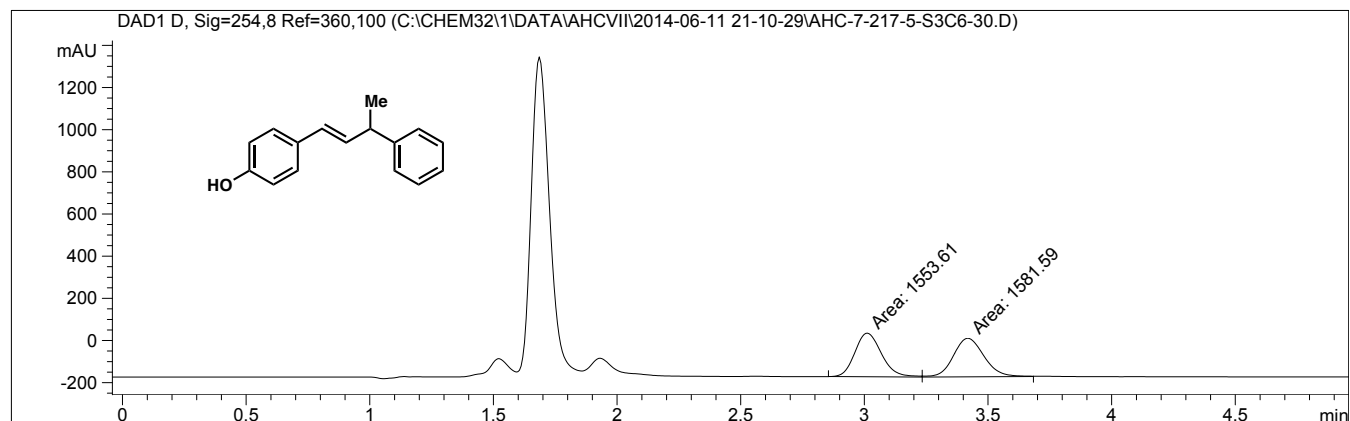

| Peak # | RetTime [min] | Type | Width [min] | Area [mAU*s] | Height [mAU] | Area %  |
|--------|---------------|------|-------------|--------------|--------------|---------|
| 1      | 3.011         | MM   | 0.1249      | 1553.60925   | 207.25208    | 49.5538 |
| 2      | 3.418         | MM   | 0.1438      | 1581.58533   | 183.37068    | 50.4462 |

**5k (Table 3, entry 11): enantioenriched, 93% ee**

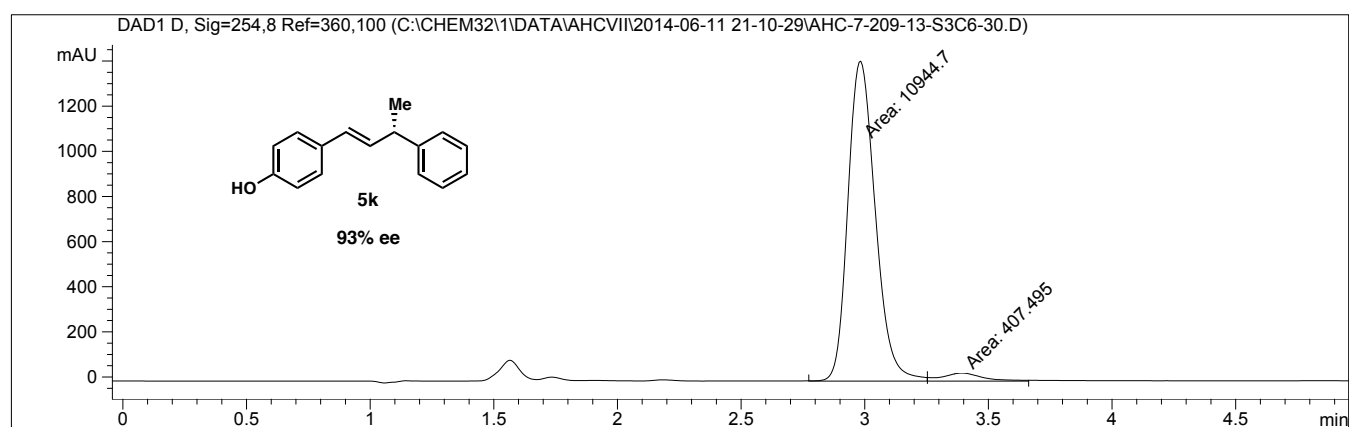

| Peak # | RetTime [min] | Type | Width [min] | Area [mAU*s] | Height [mAU] | Area %  |
|--------|---------------|------|-------------|--------------|--------------|---------|
| 1      | 2.982         | MM   | 0.1285      | 1.09447e4    | 1419.67334   | 96.4104 |
| 2      | 3.392         | MM   | 0.1893      | 407.49545    | 35.88238     | 3.5896  |



**5I (Scheme 1): racemic**

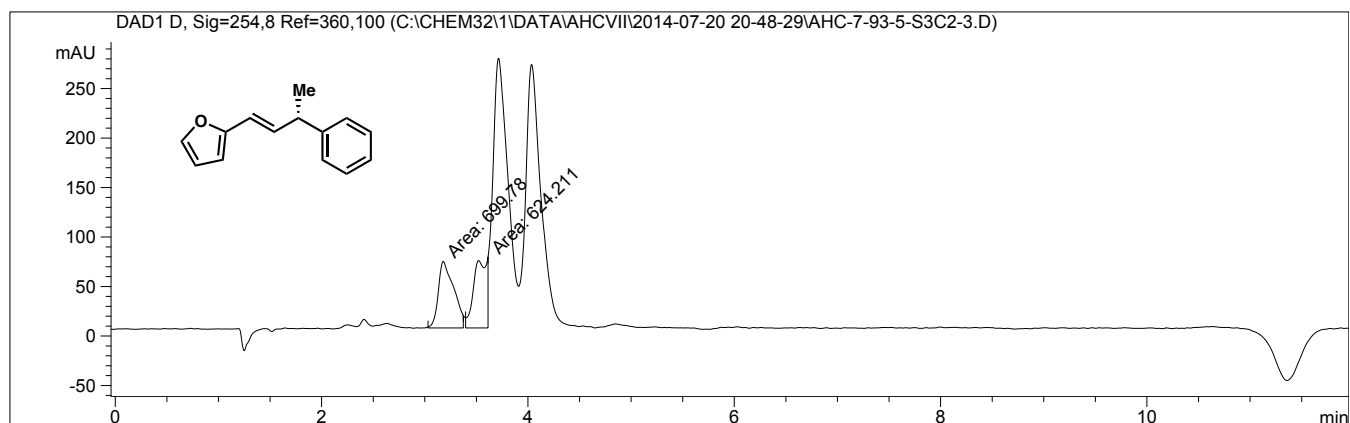

| Peak # | RetTime [min] | Type | Width [min] | Area [mAU*s] | Height [mAU] | Area %  |
|--------|---------------|------|-------------|--------------|--------------|---------|
| 1      | 3.178         | MM   | 0.1734      | 699.77979    | 67.27696     | 52.8538 |
| 2      | 3.611         | MM   | 0.1474      | 624.21143    | 70.55936     | 47.1462 |

**5I (Scheme 1): enantioenriched, 91% ee**

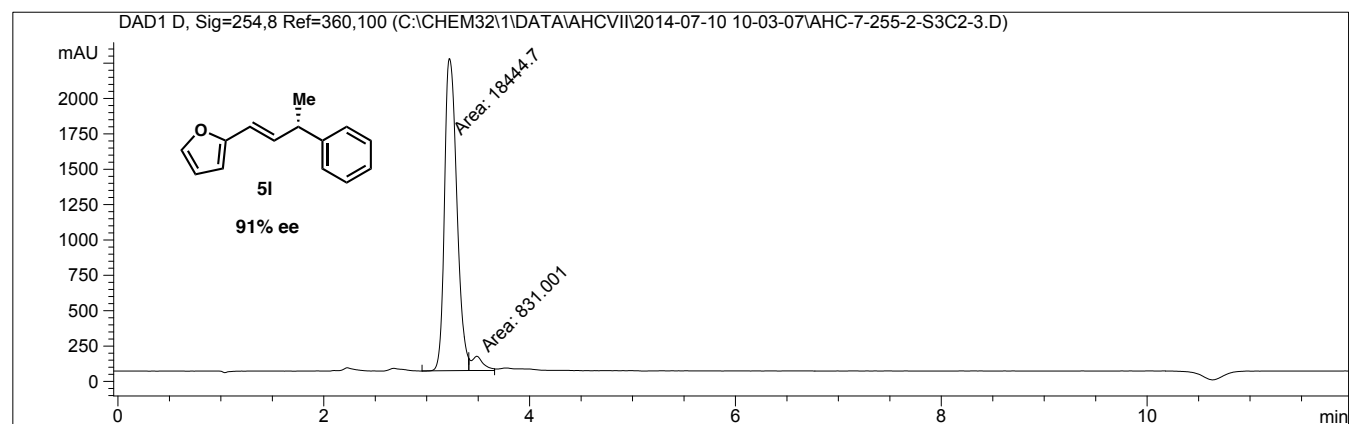

| Peak # | RetTime [min] | Type | Width [min] | Area [mAU*s] | Height [mAU] | Area %  |
|--------|---------------|------|-------------|--------------|--------------|---------|
| 1      | 3.220         | MM   | 0.1391      | 1.84447e4    | 2209.27100   | 95.6889 |
| 2      | 3.487         | MM   | 0.1366      | 831.00092    | 101.37794    | 4.3111  |

### 5m (Scheme 1): racemic

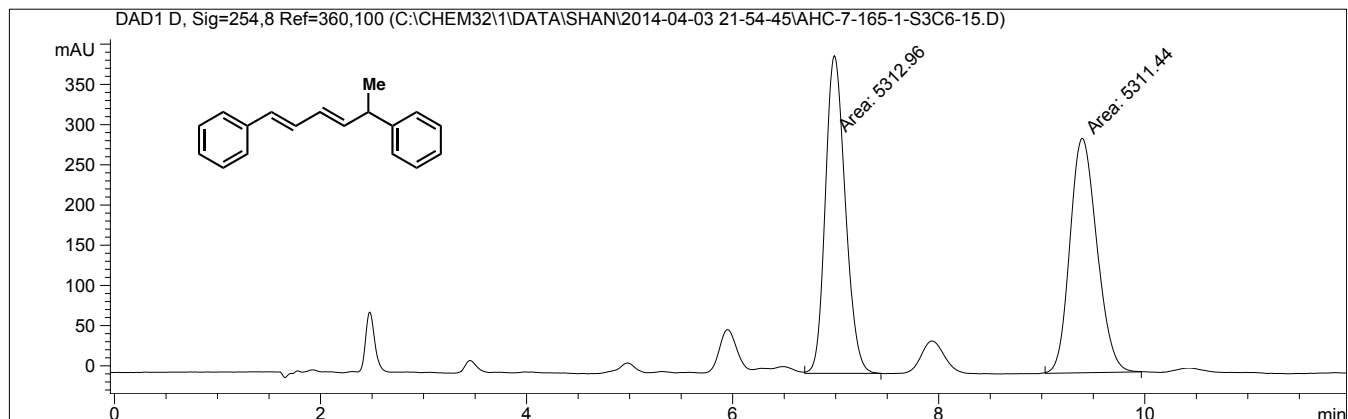

| Peak # | RetTime [min] | Type | Width [min] | Area [mAU*s] | Height [mAU] | Area %  |
|--------|---------------|------|-------------|--------------|--------------|---------|
| 1      | 6.987         | MM   | 0.2241      | 5312.95996   | 395.21527    | 50.0072 |
| 2      | 9.393         | MM   | 0.3035      | 5311.43506   | 291.66327    | 49.9928 |

### 5m (Scheme 1): enantioenriched, 92% ee

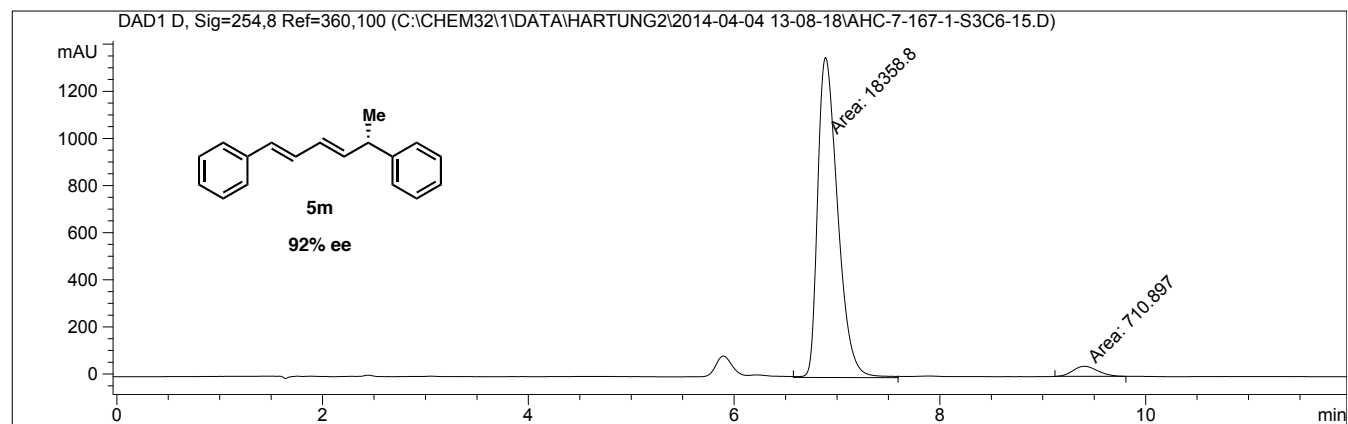

| Peak # | RetTime [min] | Type | Width [min] | Area [mAU*s] | Height [mAU] | Area %  |
|--------|---------------|------|-------------|--------------|--------------|---------|
| 1      | 6.889         | MM   | 0.2251      | 1.83588e4    | 1359.02136   | 96.2721 |
| 2      | 9.404         | MM   | 0.2780      | 710.89673    | 42.61983     | 3.7279  |

### 5n (Scheme 1): racemic

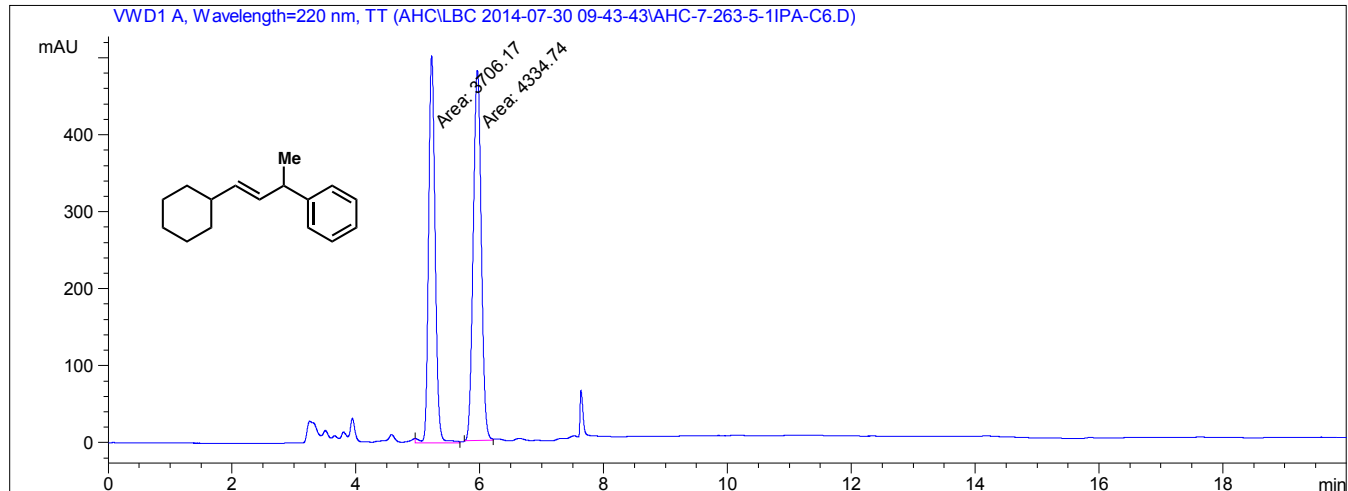

| Peak # | RetTime [min] | Type | Width [min] | Area mAU *s | Height [mAU] | Area %  |
|--------|---------------|------|-------------|-------------|--------------|---------|
| 1      | 5.224         | MM   | 0.1228      | 3706.16968  | 503.21298    | 46.0914 |
| 2      | 5.962         | MM   | 0.1500      | 4334.74365  | 481.51410    | 53.9086 |

### 5n (Scheme 1): enantioenriched, 96% ee

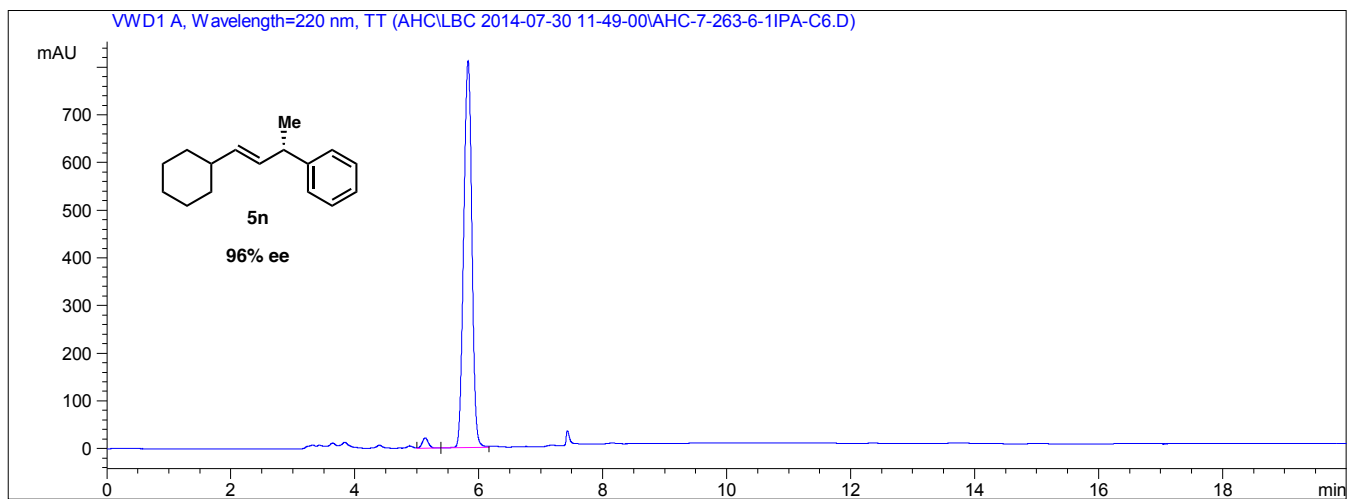

| Peak # | RetTime [min] | Type | Width [min] | Area mAU *s | Height [mAU] | Area %  |
|--------|---------------|------|-------------|-------------|--------------|---------|
| 1      | 5.135         | VV   | 0.1050      | 148.14879   | 21.73537     | 1.9461  |
| 2      | 5.828         | VV   | 0.1459      | 7464.48193  | 811.72534    | 98.0539 |

**5o (Scheme 1): racemic**

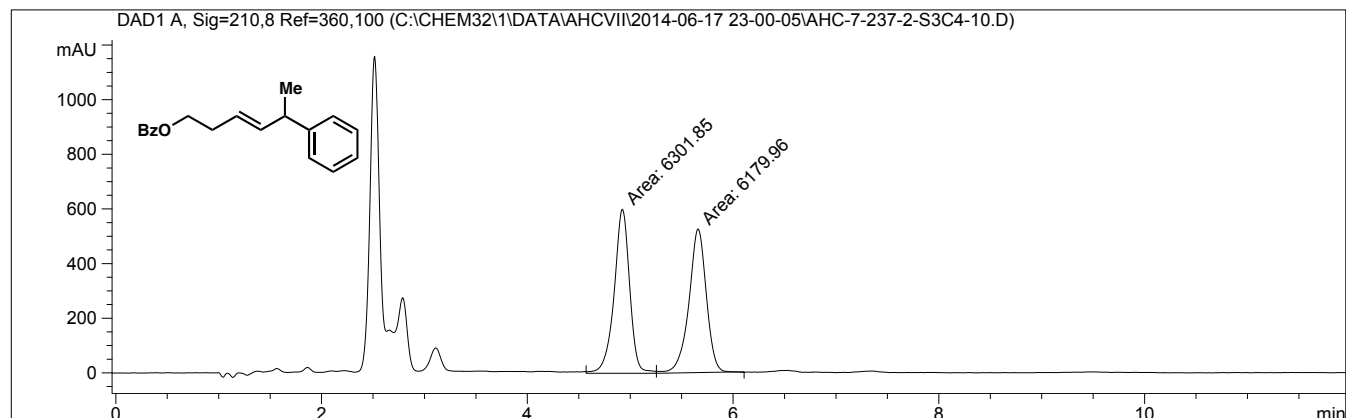

| Peak # | RetTime [min] | Type | Width [min] | Area [mAU*s] | Height [mAU] | Area %  |
|--------|---------------|------|-------------|--------------|--------------|---------|
| 1      | 4.924         | MM   | 0.1744      | 6301.85156   | 602.20233    | 50.4883 |
| 2      | 5.660         | MM   | 0.1955      | 6179.95850   | 526.80280    | 49.5117 |

**5o (Scheme 1): enantioenriched, 94% ee**

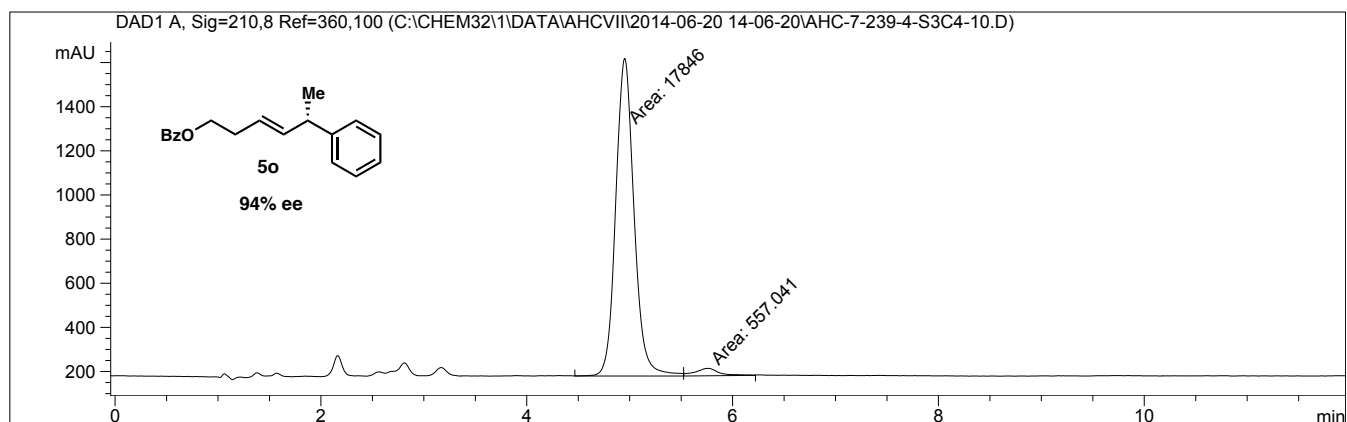

| Peak # | RetTime [min] | Type | Width [min] | Area [mAU*s] | Height [mAU] | Area %  |
|--------|---------------|------|-------------|--------------|--------------|---------|
| 1      | 4.951         | MM   | 0.2063      | 1.78460e4    | 1441.90649   | 96.9731 |
| 2      | 5.755         | MM   | 0.2719      | 557.04138    | 34.14230     | 3.0269  |

### 5p (Scheme 1): racemic

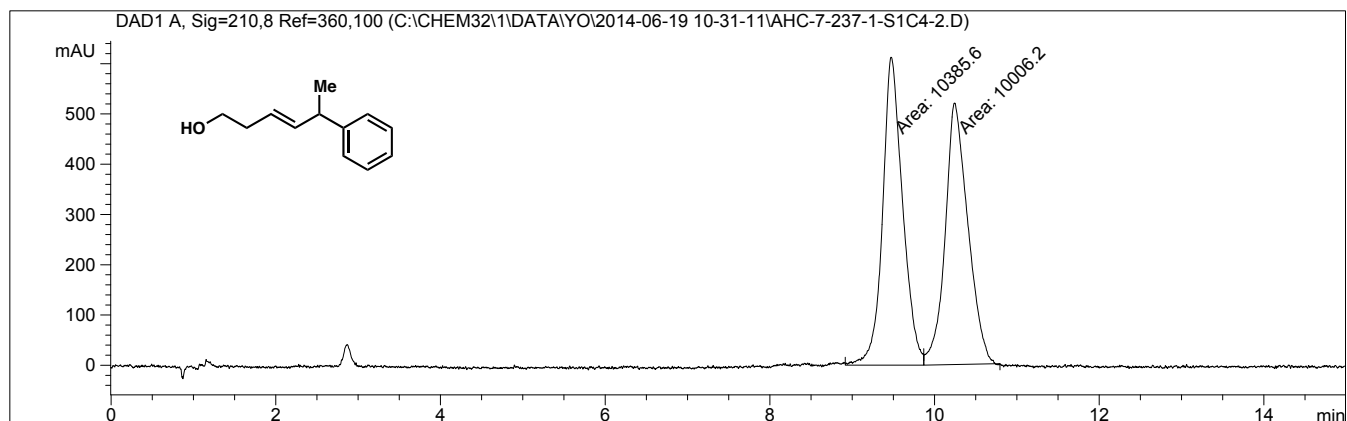

| Peak # | RetTime [min] | Type | Width [min] | Area [mAU*s] | Height [mAU] | Area %  |
|--------|---------------|------|-------------|--------------|--------------|---------|
| 1      | 9.474         | MM   | 0.2823      | 1.03856e4    | 613.19647    | 50.9302 |
| 2      | 10.244        | MM   | 0.3204      | 1.00062e4    | 520.49475    | 49.0698 |

### 5p (Scheme 1): enantioenriched, 94% ee

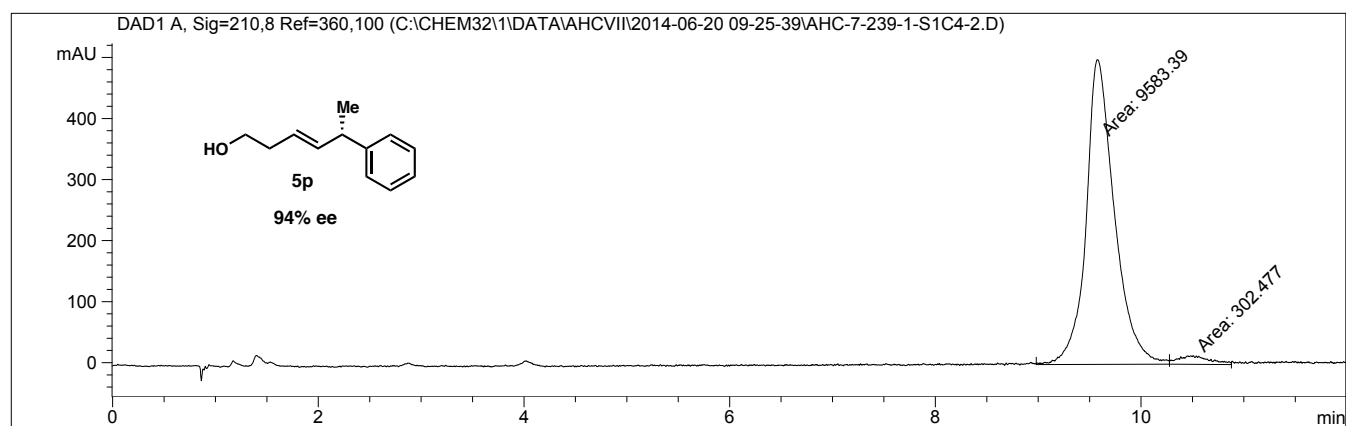

| Peak # | RetTime [min] | Type | Width [min] | Area [mAU*s] | Height [mAU] | Area %  |
|--------|---------------|------|-------------|--------------|--------------|---------|
| 1      | 9.577         | MM   | 0.3197      | 9583.38965   | 499.54858    | 96.9403 |
| 2      | 10.504        | MM   | 0.3286      | 302.47656    | 13.89878     | 3.0597  |

### 3o (Scheme 1): racemic

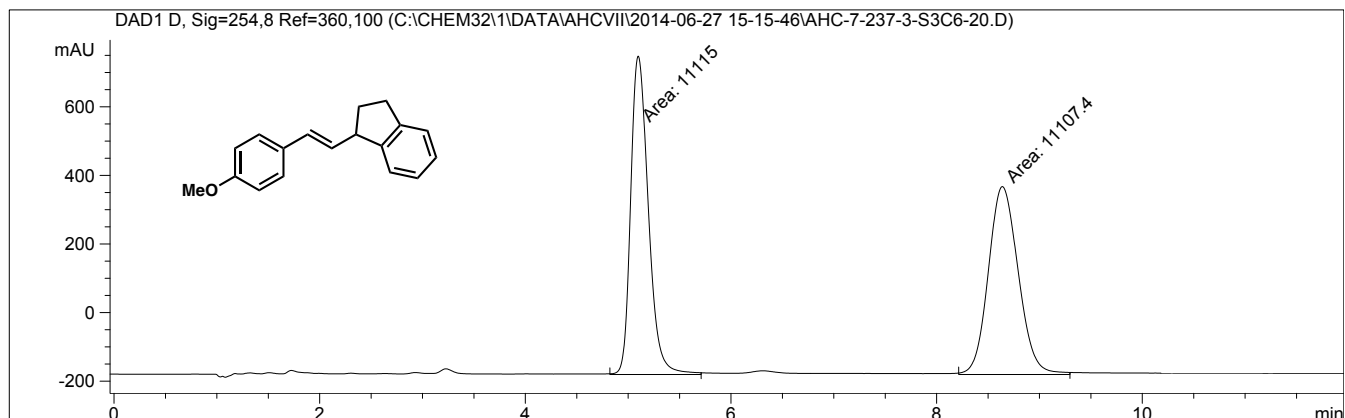

| Peak # | RetTime [min] | Type | Width [min] | Area [mAU*s] | Height [mAU] | Area %  |
|--------|---------------|------|-------------|--------------|--------------|---------|
| 1      | 5.098         | MM   | 0.1994      | 1.11150e4    | 929.12982    | 50.0170 |
| 2      | 8.639         | MM   | 0.3377      | 1.11074e4    | 548.26196    | 49.9830 |

### 3o (Scheme 1): enantioenriched, 94% ee

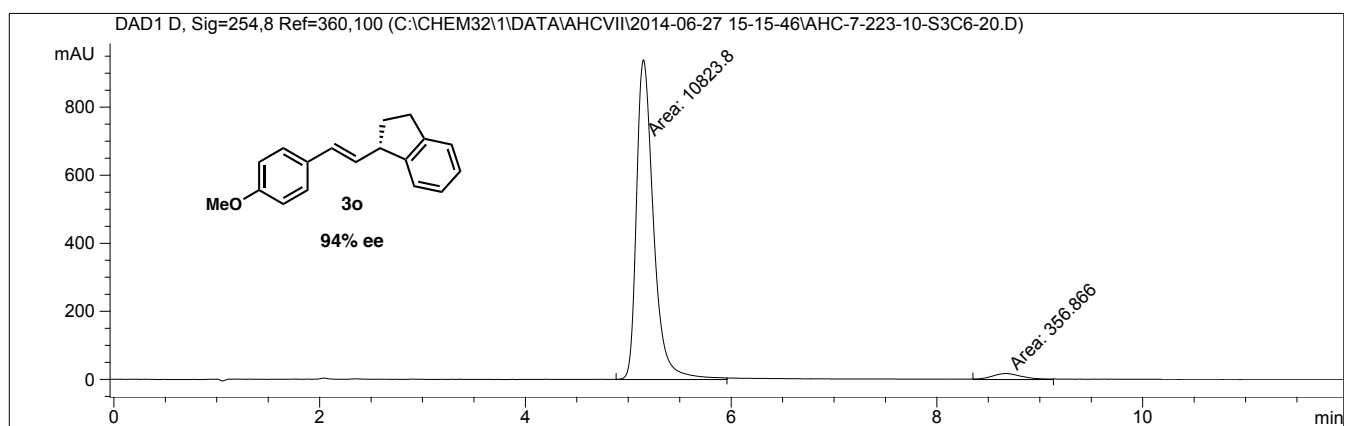

| Peak # | RetTime [min] | Type | Width [min] | Area [mAU*s] | Height [mAU] | Area %  |
|--------|---------------|------|-------------|--------------|--------------|---------|
| 1      | 5.147         | MM   | 0.1918      | 1.08238e4    | 940.38129    | 96.8082 |
| 2      | 8.669         | MM   | 0.3406      | 356.86603    | 17.46182     | 3.1918  |

### 3p (Scheme 1): racemic

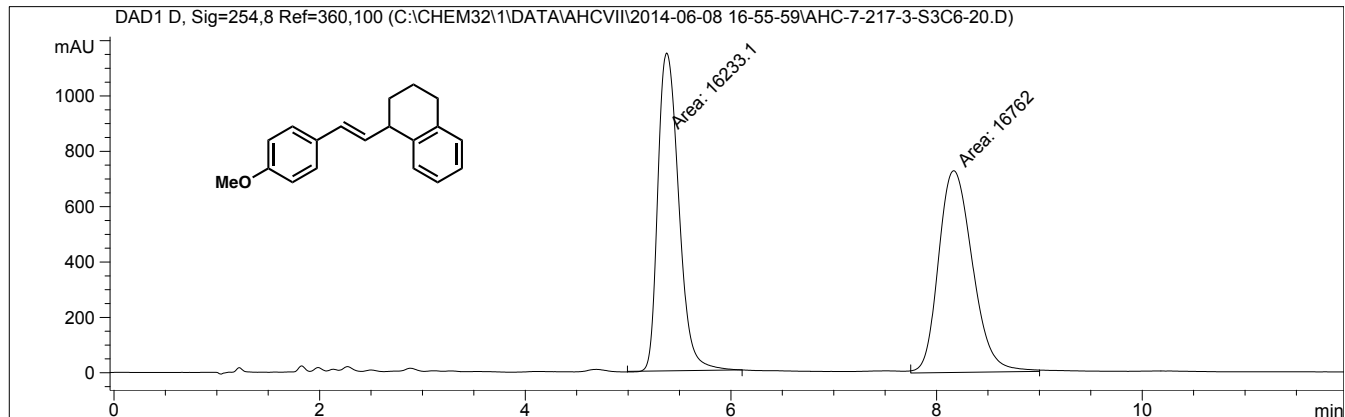

| Peak # | RetTime [min] | Type | Width [min] | Area [mAU*s] | Height [mAU] | Area %  |
|--------|---------------|------|-------------|--------------|--------------|---------|
| 1      | 5.375         | MM   | 0.2355      | 1.62331e4    | 1148.88831   | 49.1985 |
| 2      | 8.167         | MM   | 0.3832      | 1.67620e4    | 728.97369    | 50.8015 |

### 3p (Scheme 1): enantioenriched, 90% ee

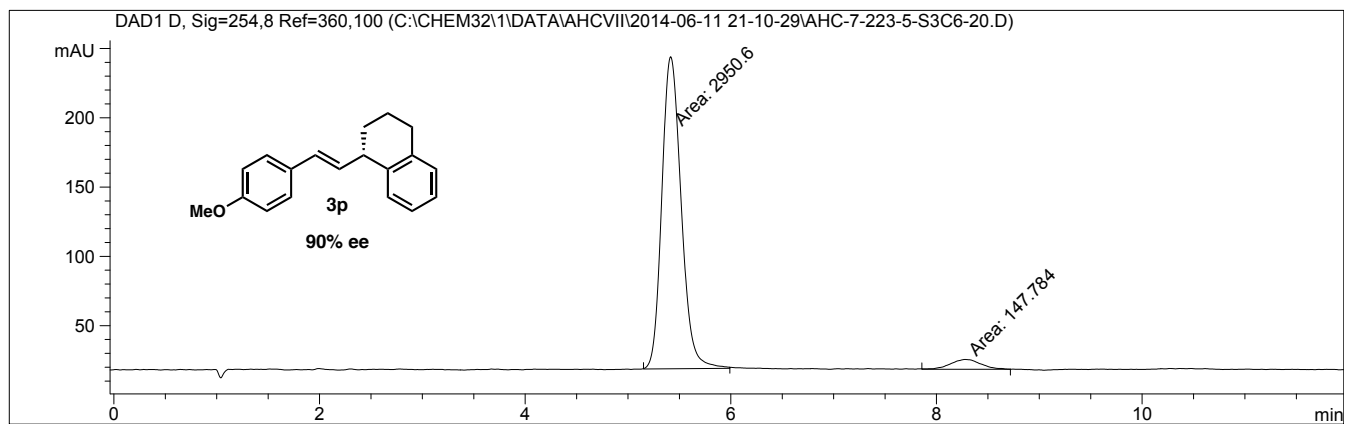

| Peak # | RetTime [min] | Type | Width [min] | Area [mAU*s] | Height [mAU] | Area %  |
|--------|---------------|------|-------------|--------------|--------------|---------|
| 1      | 5.414         | MM   | 0.2183      | 2950.59619   | 225.29623    | 95.2303 |
| 2      | 8.276         | MM   | 0.3454      | 147.78352    | 7.13138      | 4.7697  |

**7 (Scheme 2): racemic**

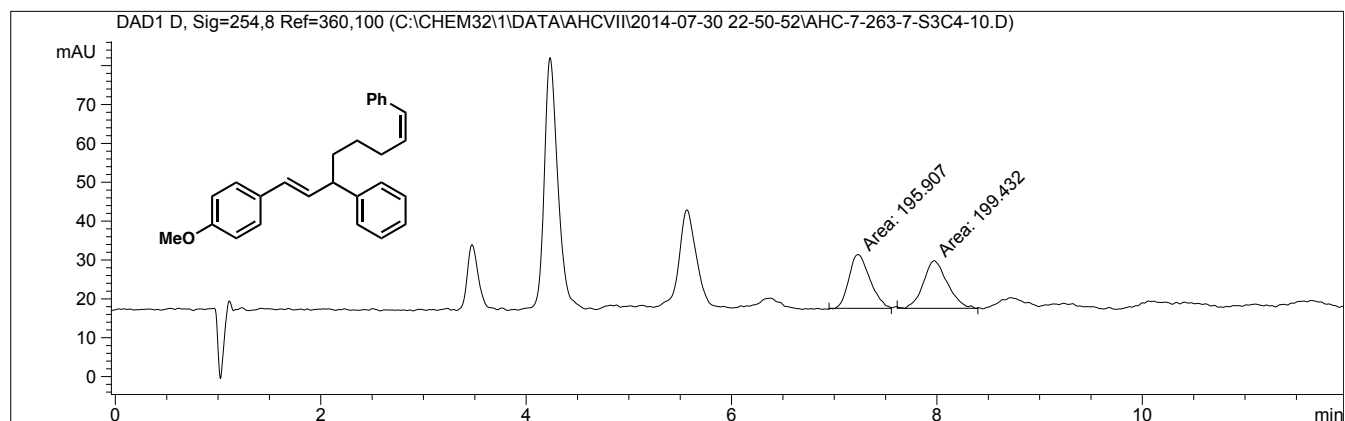

| Peak # | RetTime [min] | Type | Width [min] | Area [mAU*s] | Height [mAU] | Area %  |
|--------|---------------|------|-------------|--------------|--------------|---------|
| 1      | 7.230         | MM   | 0.2362      | 195.90703    | 13.82199     | 49.5542 |
| 2      | 7.972         | MM   | 0.2706      | 199.43159    | 12.28512     | 50.4458 |

**7 (Scheme 2): enantioenriched, 96% ee**

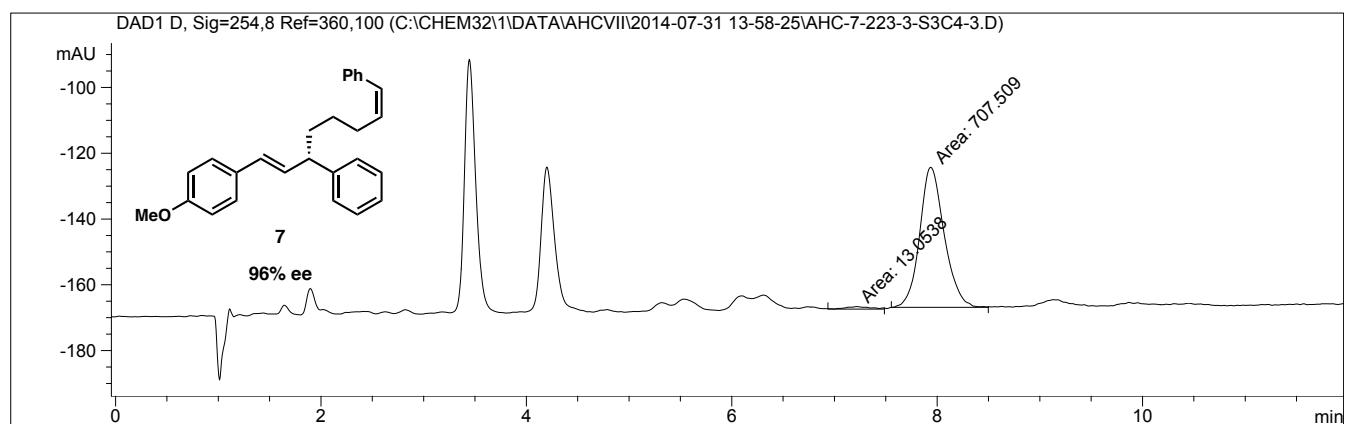

| Peak # | RetTime [min] | Type | Width [min] | Area [mAU*s] | Height [mAU] | Area %  |
|--------|---------------|------|-------------|--------------|--------------|---------|
| 1      | 7.215         | MM   | 0.2808      | 13.05381     | 7.74711e-1   | 1.8116  |
| 2      | 7.938         | MM   | 0.2768      | 707.50922    | 42.60372     | 98.1884 |



ahc-7-181

Sample Name **ahc-7-181**  
Date collected **2014-04-29**

Pulse sequence **PROTON**  
Solvent **cdcl3**

Temperature **25**  
Spectrometer **-vnmrs400**

Study owner **acherney**  
Operator **autouser**

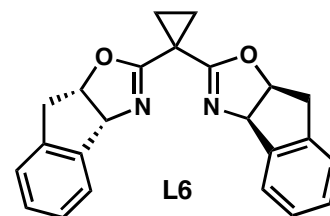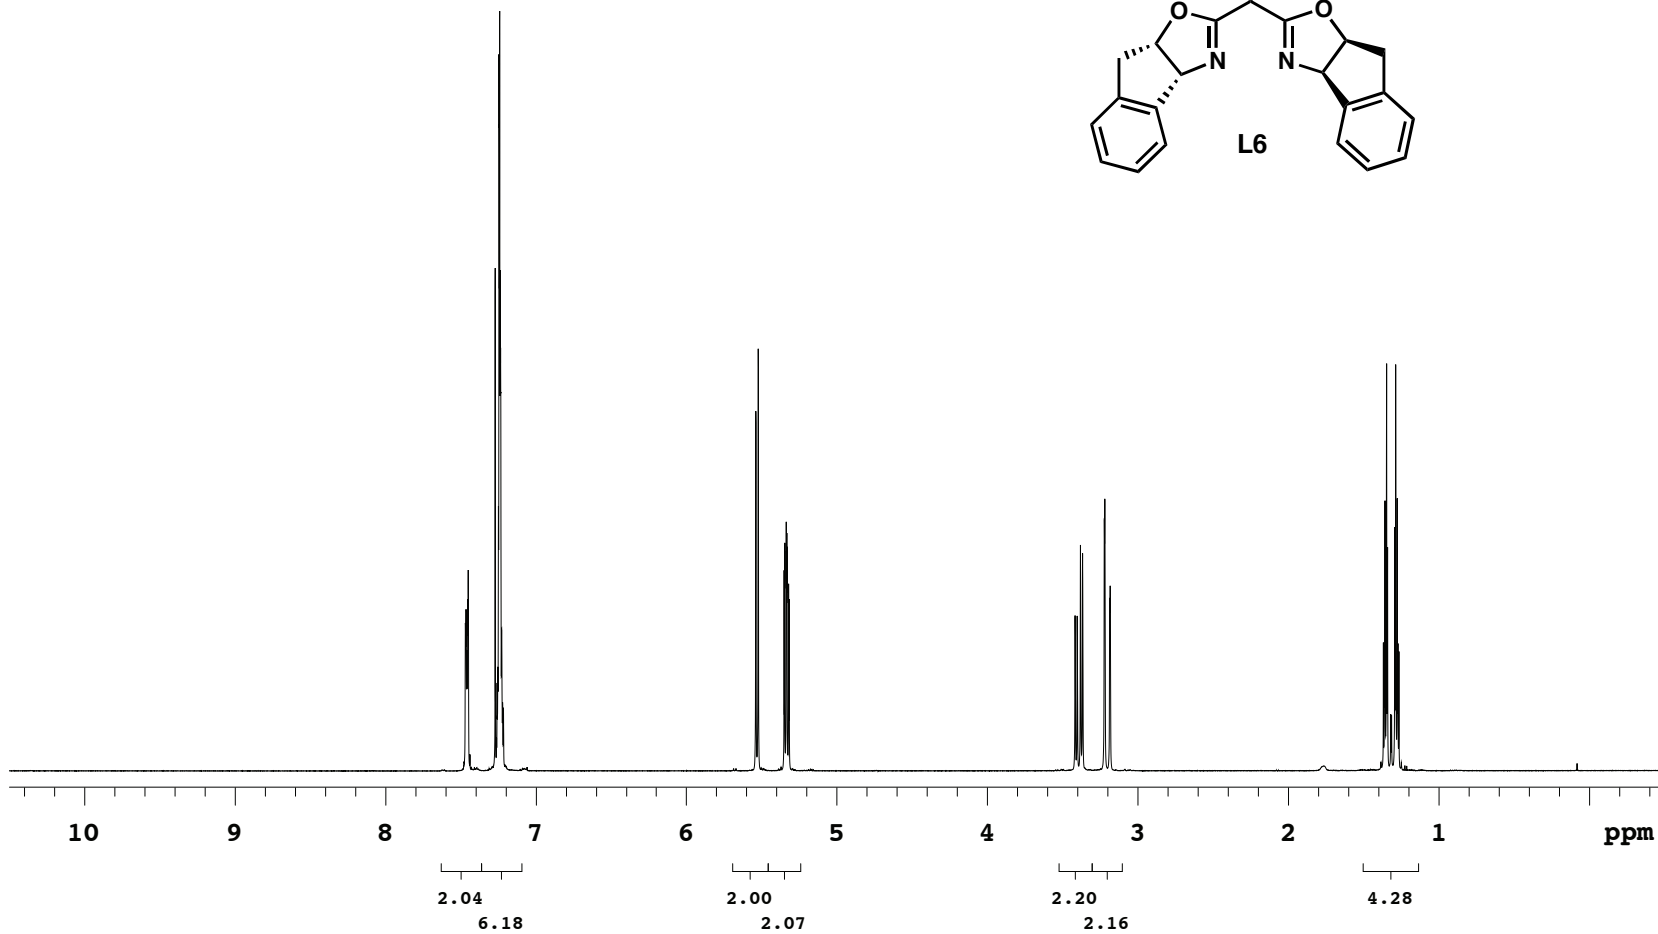

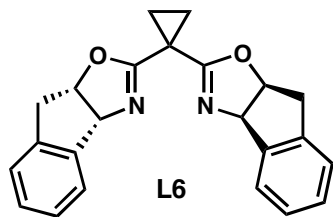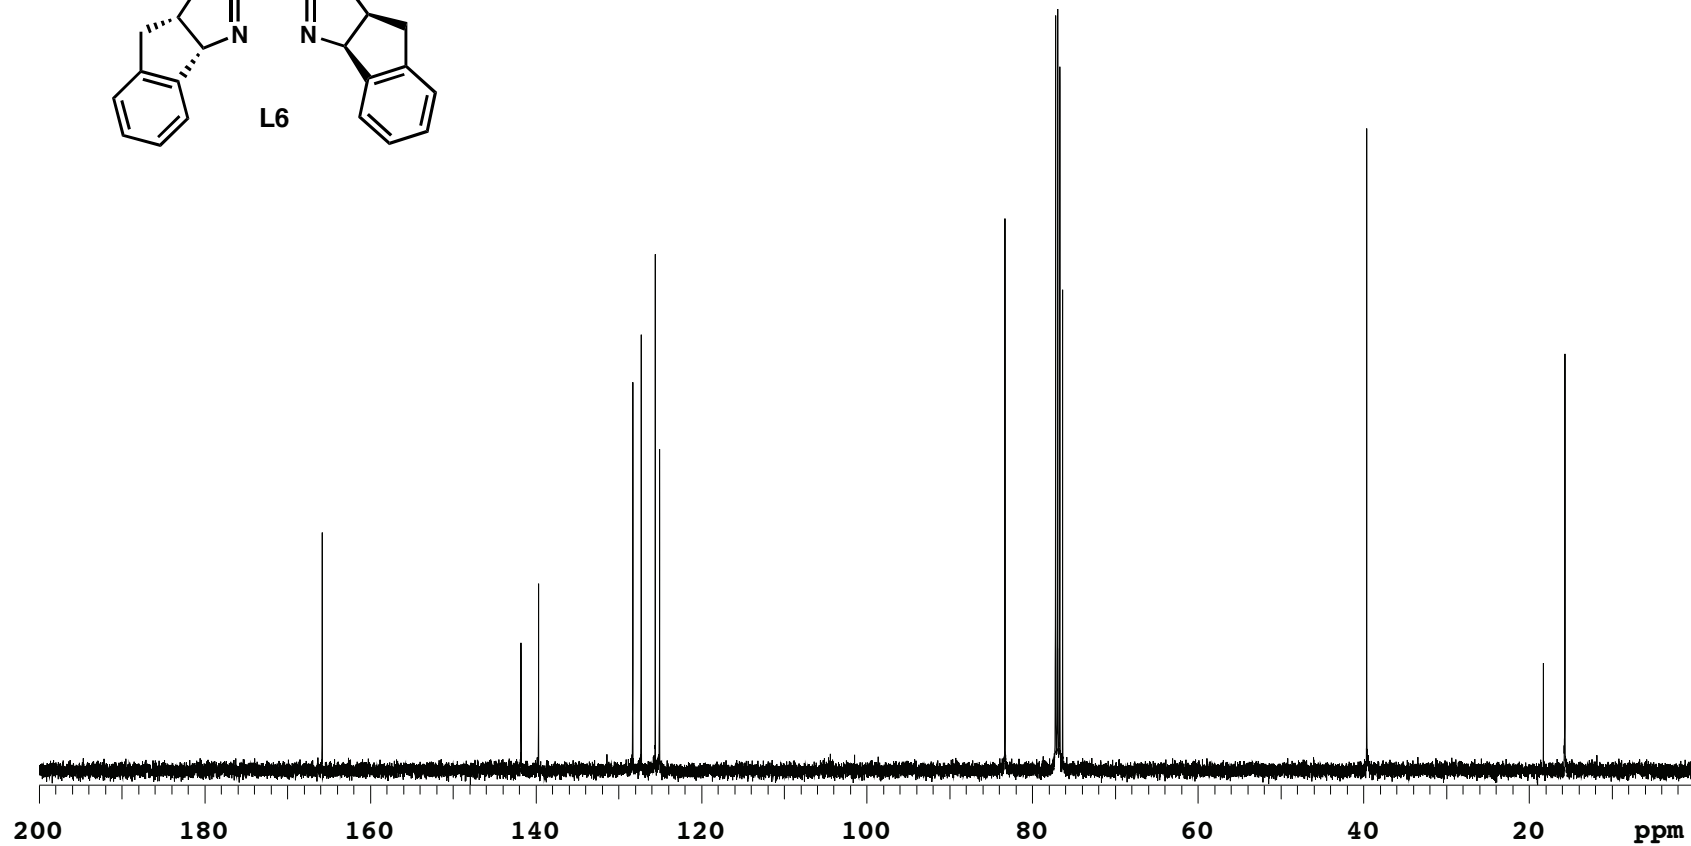

ahc-7-259-2

Sample Name **ahc-7-259-2**  
Date collected **2014-07-16**

Pulse sequence **PROTON**  
Solvent **cdcl3**

Temperature **25**  
Spectrometer **-vnmrs400**

Study owner **acherney**  
Operator **autouser**

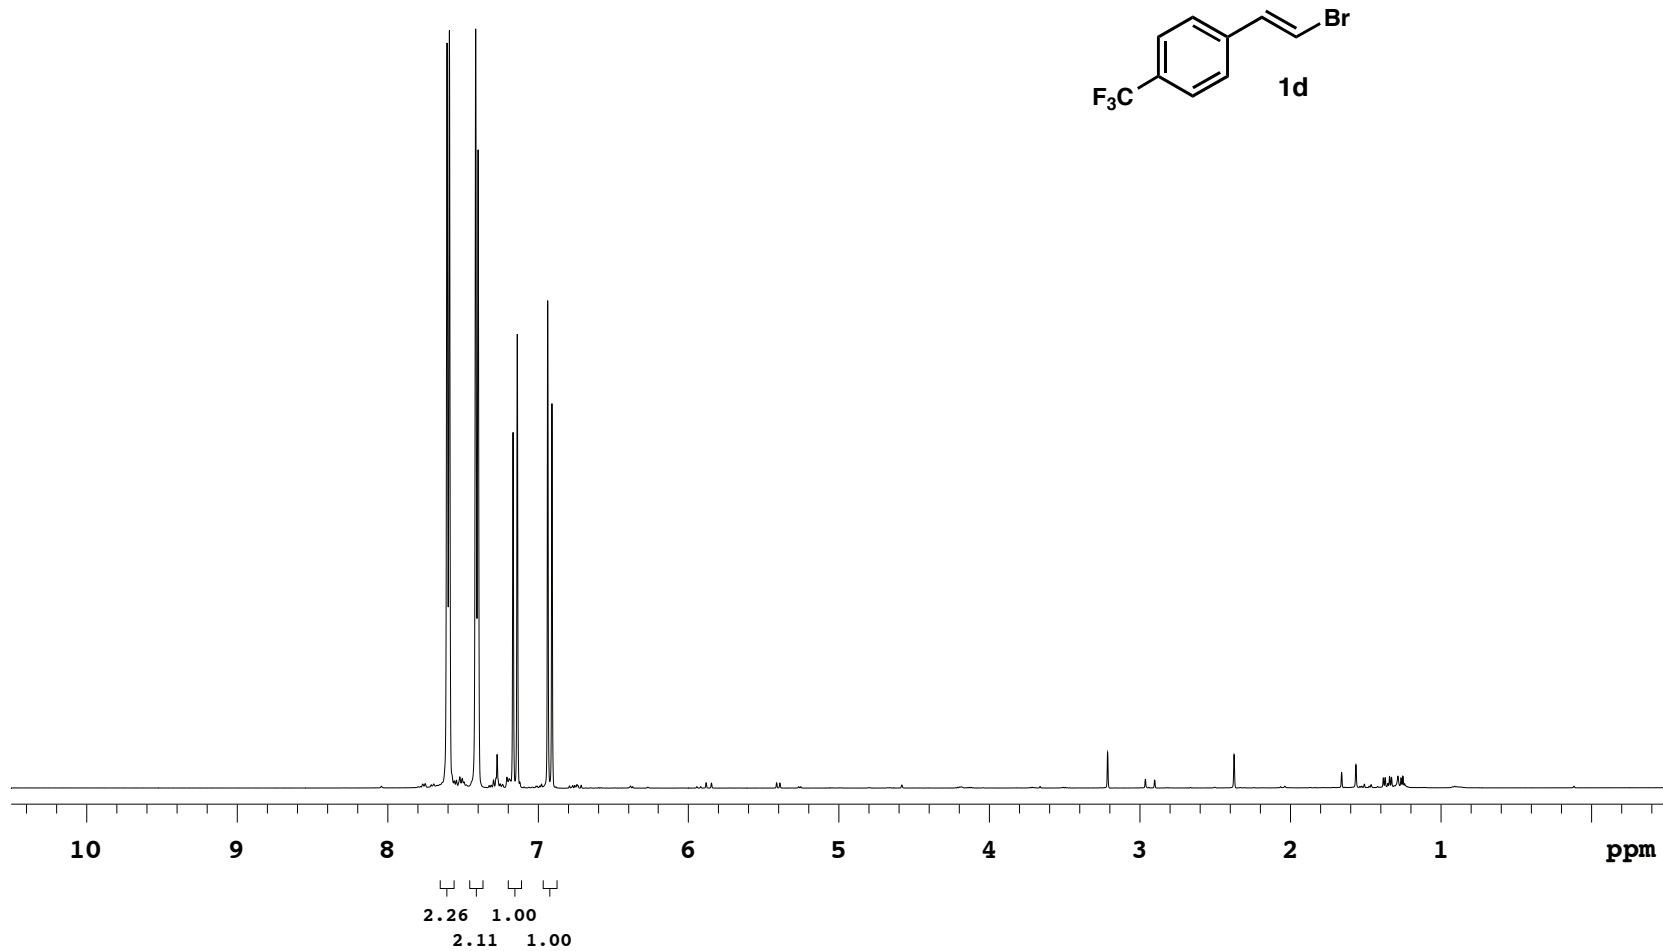

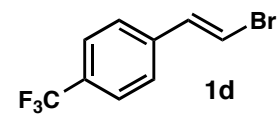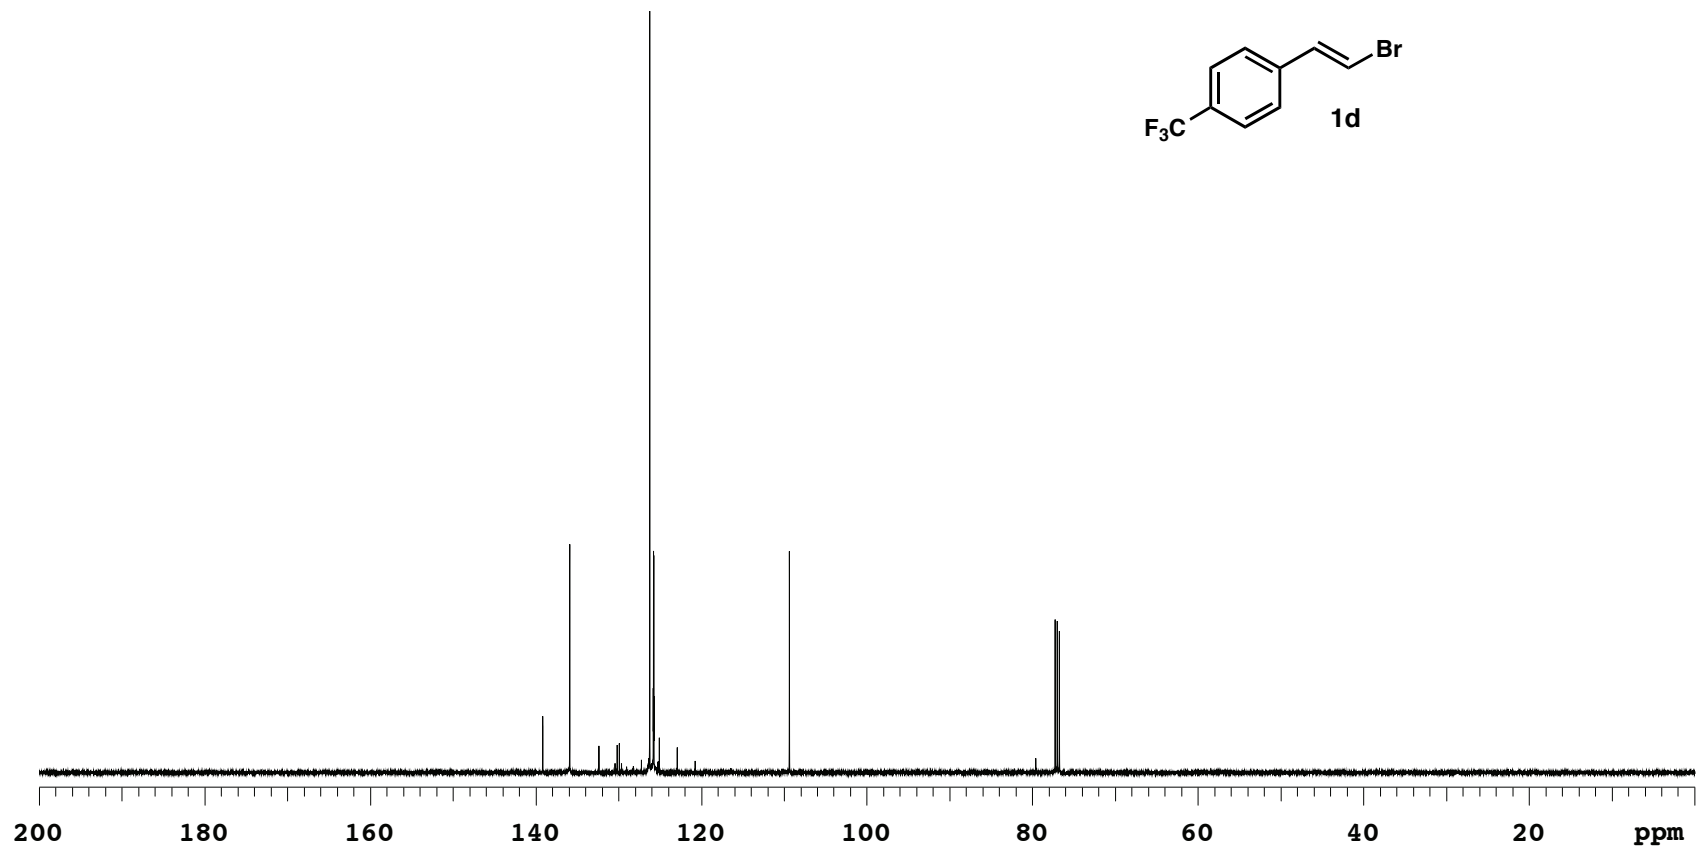

ahc-7-213-2

Sample Name **ahc-7-213-2**  
Date collected **2014-07-31**

Pulse sequence **PROTON**  
Solvent **cdcl3**

Temperature **25**  
Spectrometer **-vnmrs400**

Study owner **acherney**  
Operator **autouser**

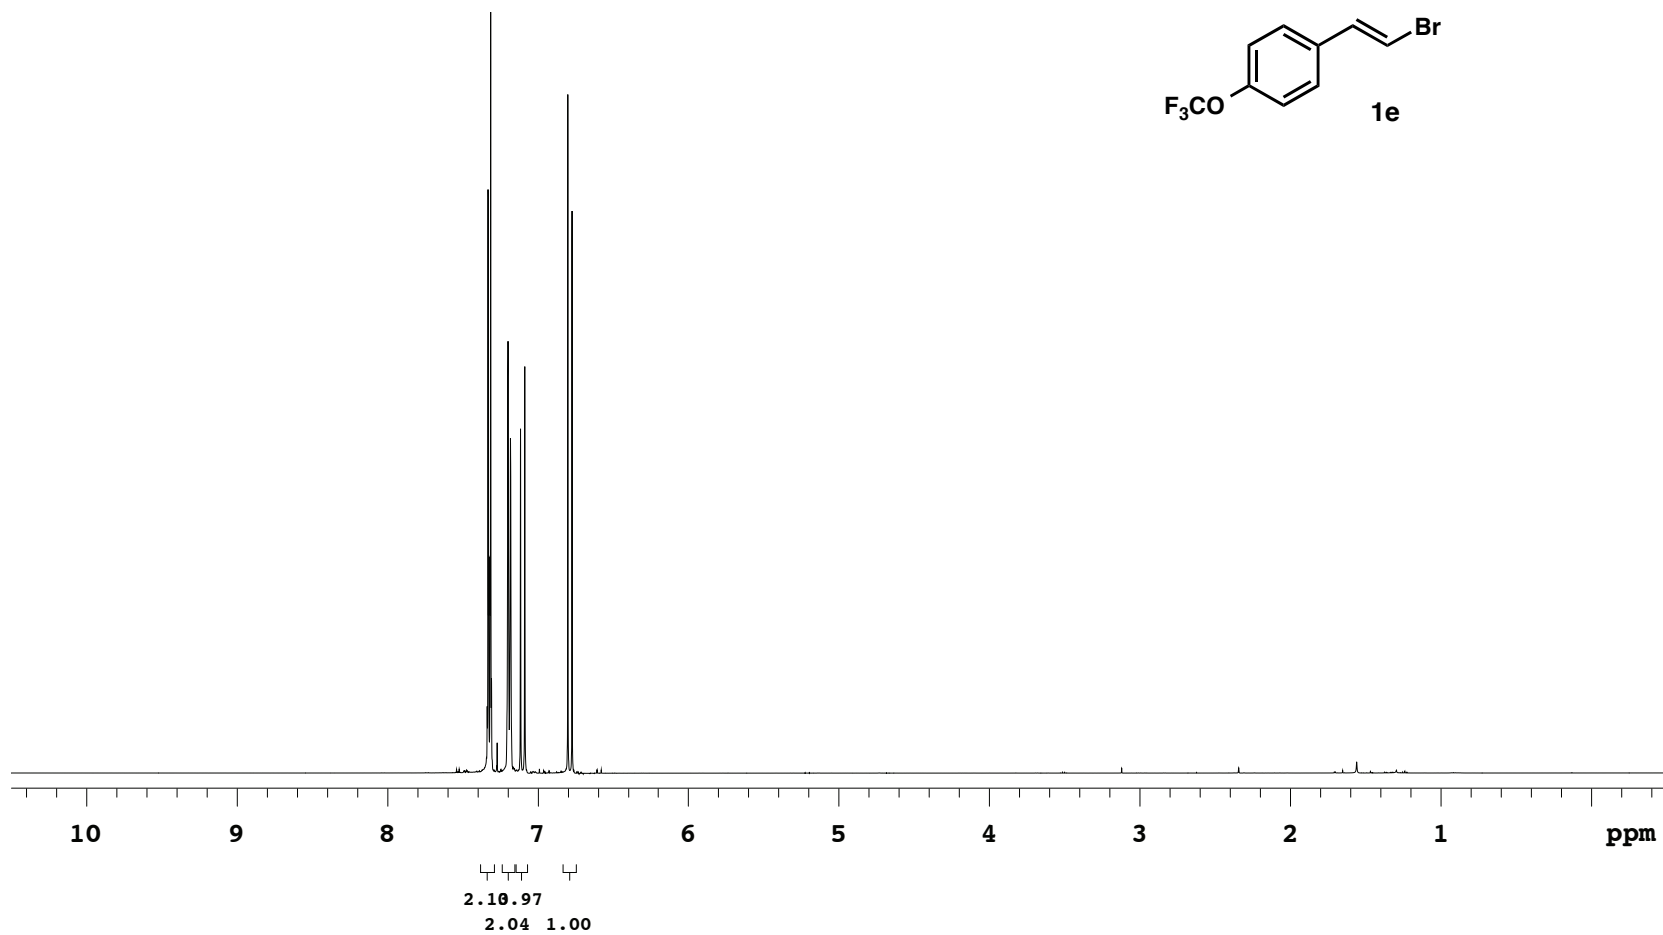

ahc-7-213-2

Sample Name **ahc-7-213-2**  
Date collected **2014-07-31**

Pulse sequence **CARBON**  
Solvent **cdcl3**

Temperature **25**  
Spectrometer **-vnmrs400**

Study owner **acherney**  
Operator **autouser**

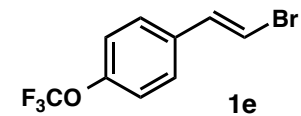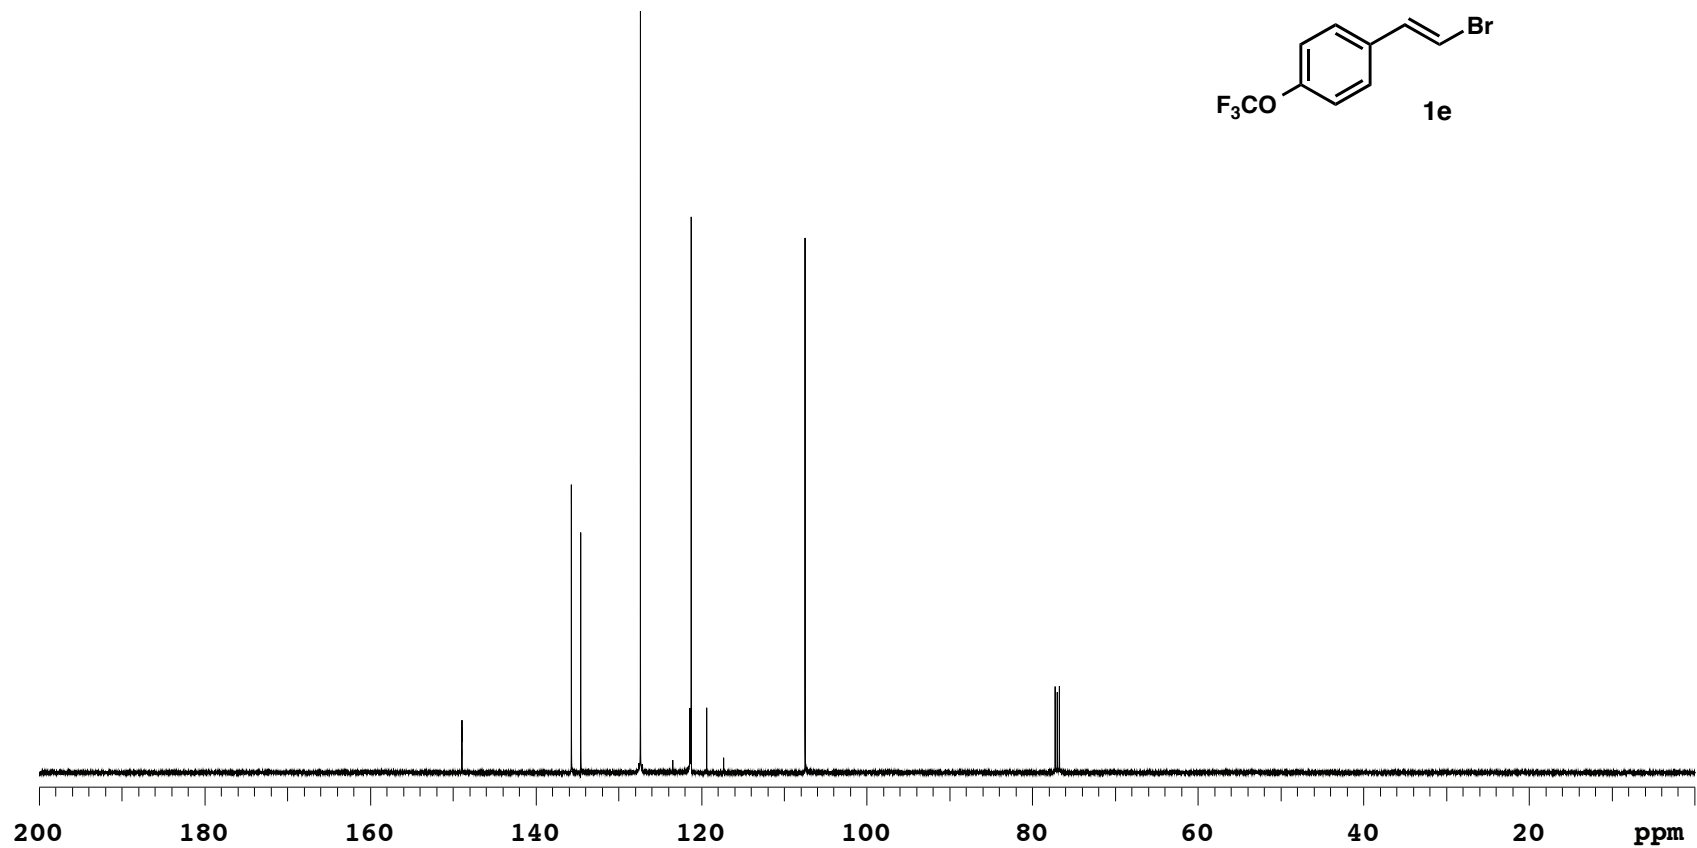

ahc-7-213-3

Sample Name **ahc-7-213-3**  
Date collected **2014-07-17**

Pulse sequence **PROTON**  
Solvent **cdcl3**

Temperature **25**  
Spectrometer **-vnmrs400**

Study owner **acherney**  
Operator **autouser**

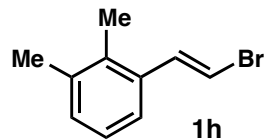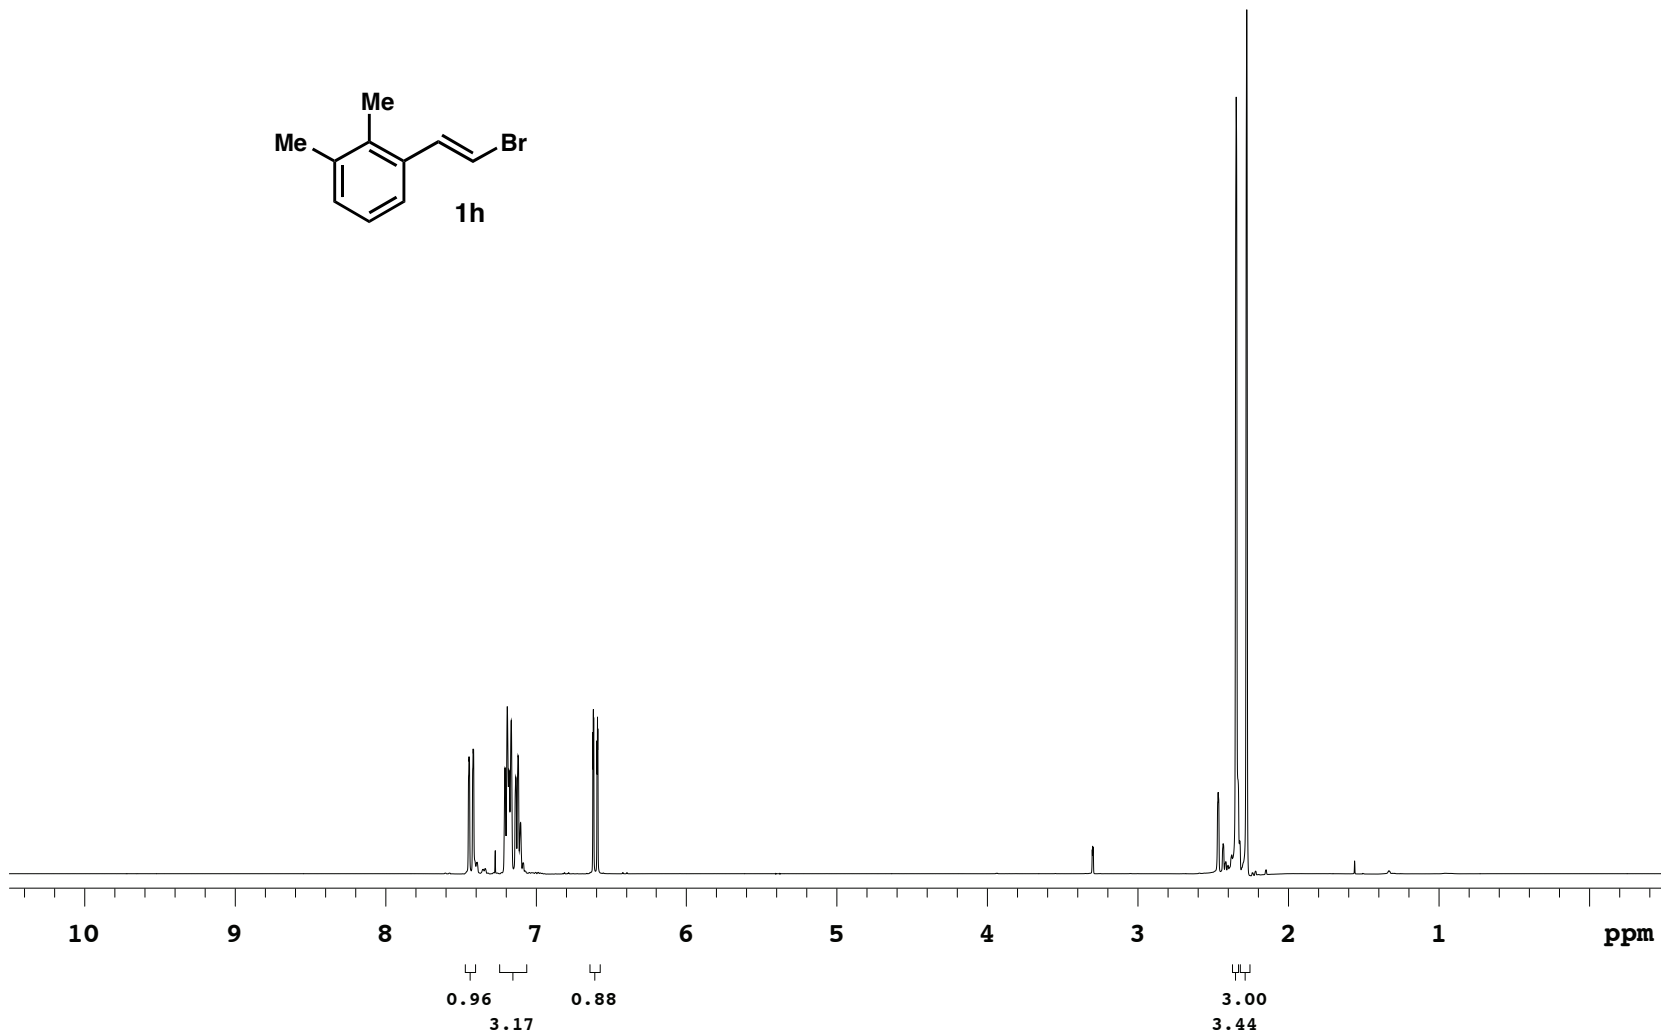

ahc-7-213-3

Sample Name **ahc-7-213-3**  
Date collected **2014-07-17**

Pulse sequence **CARBON**  
Solvent **cdcl3**

Temperature **25**  
Spectrometer **-vnmrs400**

Study owner **acherney**  
Operator **autouser**

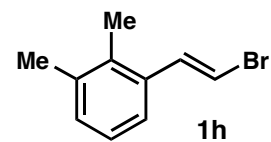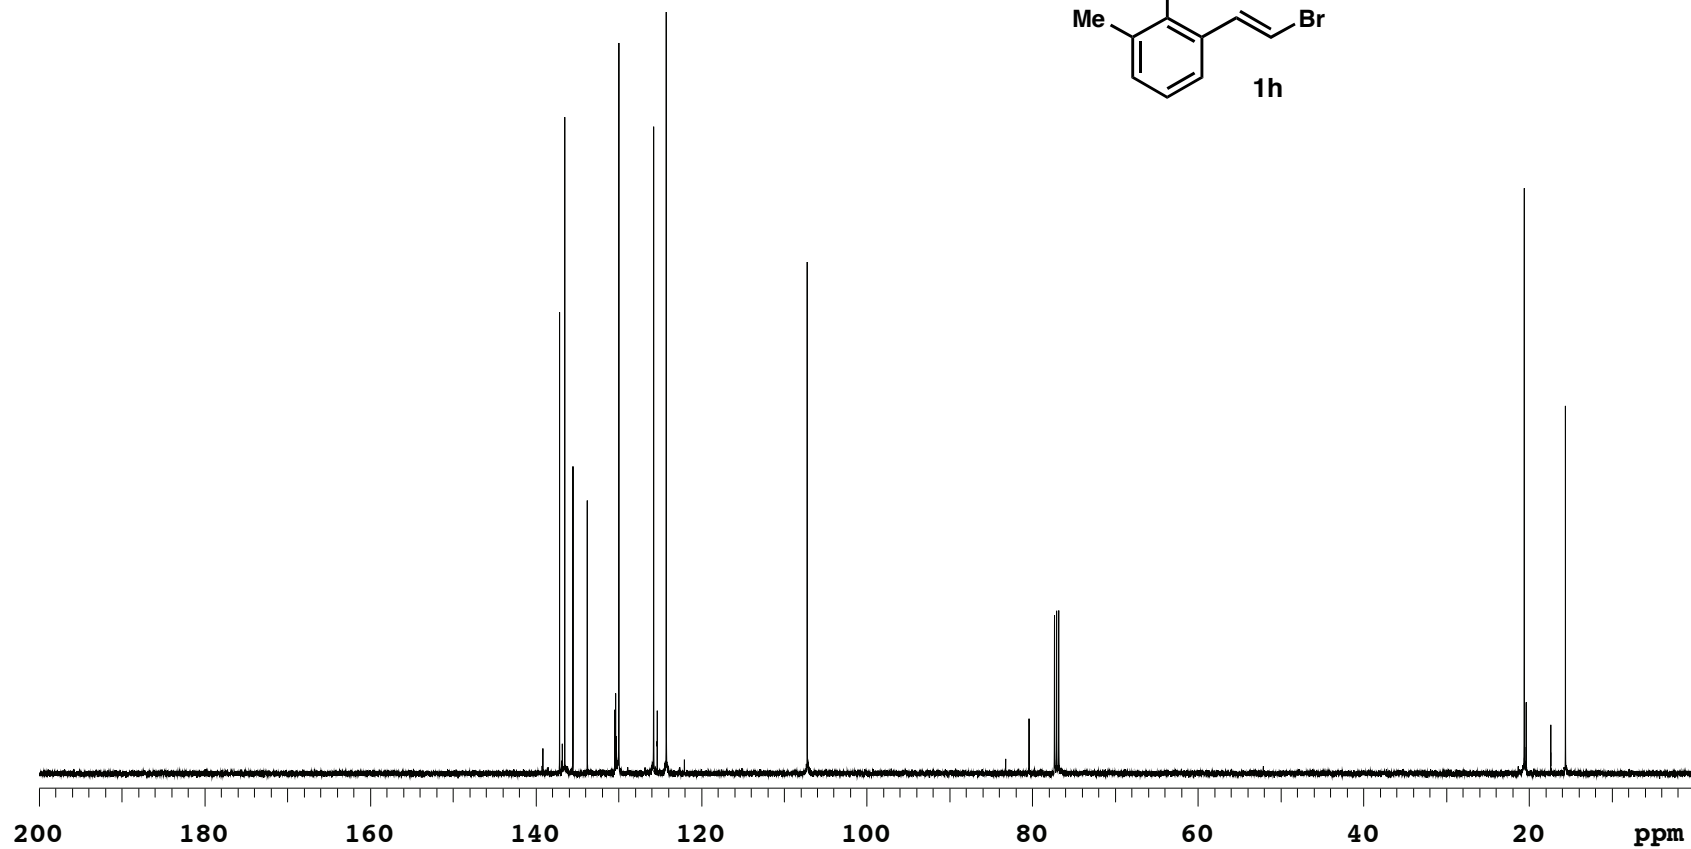



ahc-7-213-7

Sample Name **ahc-7-213-7**  
Date collected **2014-07-15**

Pulse sequence **PROTON**  
Solvent **cdcl3**

Temperature **25**  
Spectrometer **-vnmrs400**

Study owner **acherney**  
Operator **autouser**

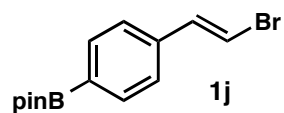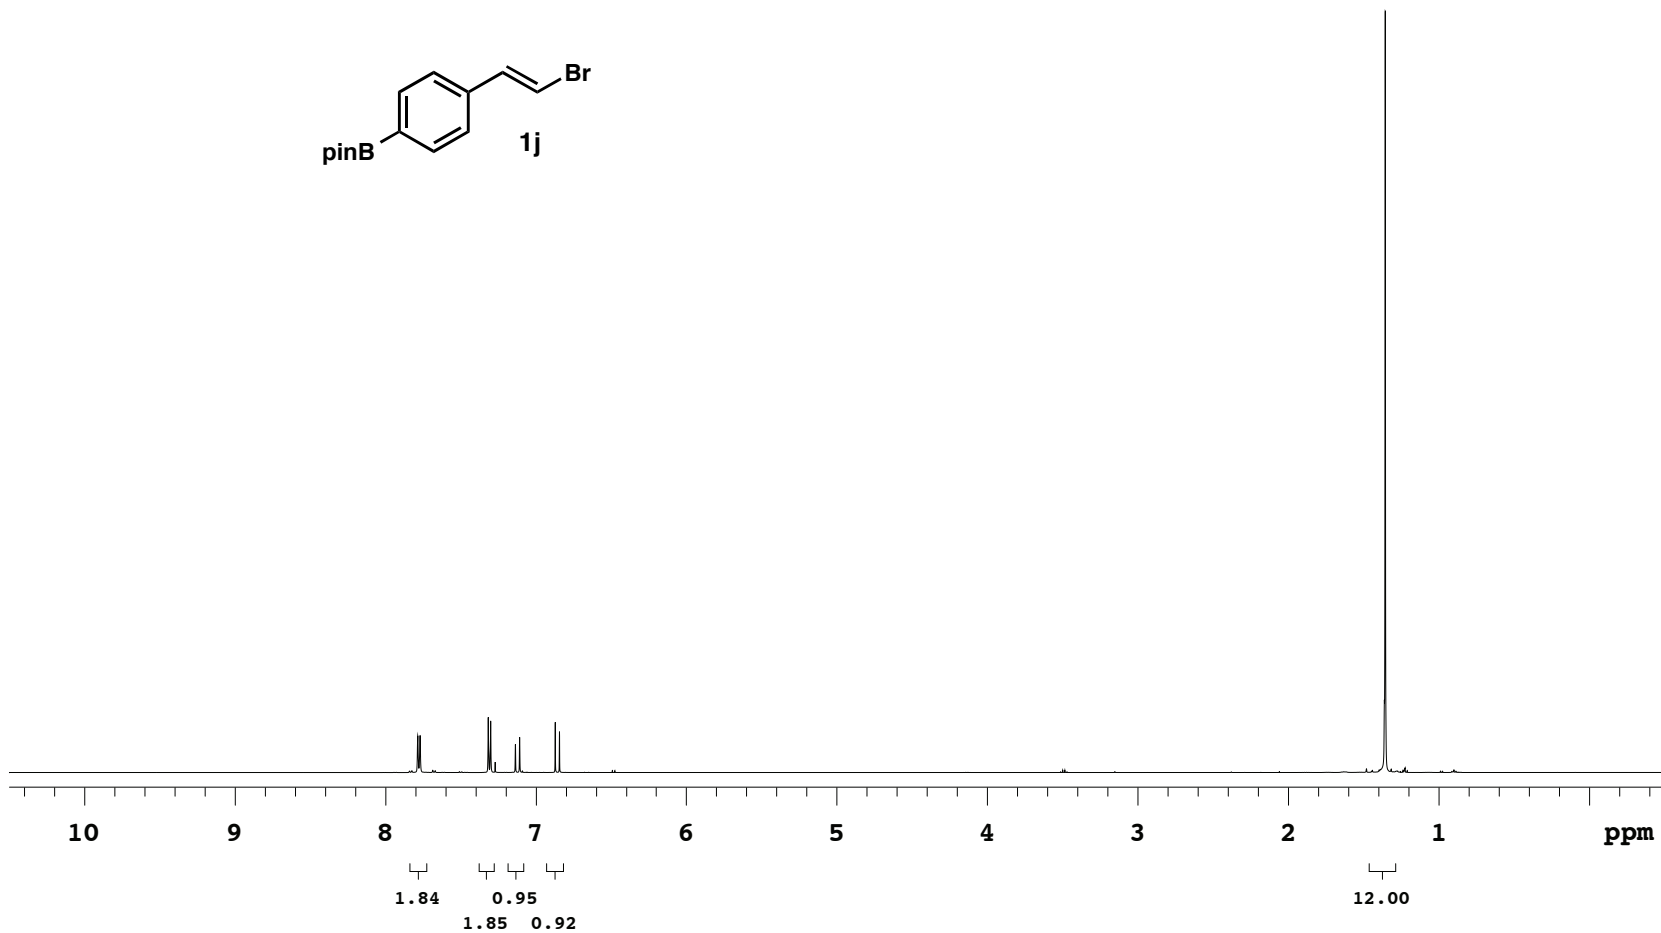

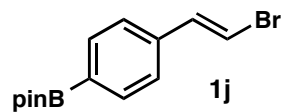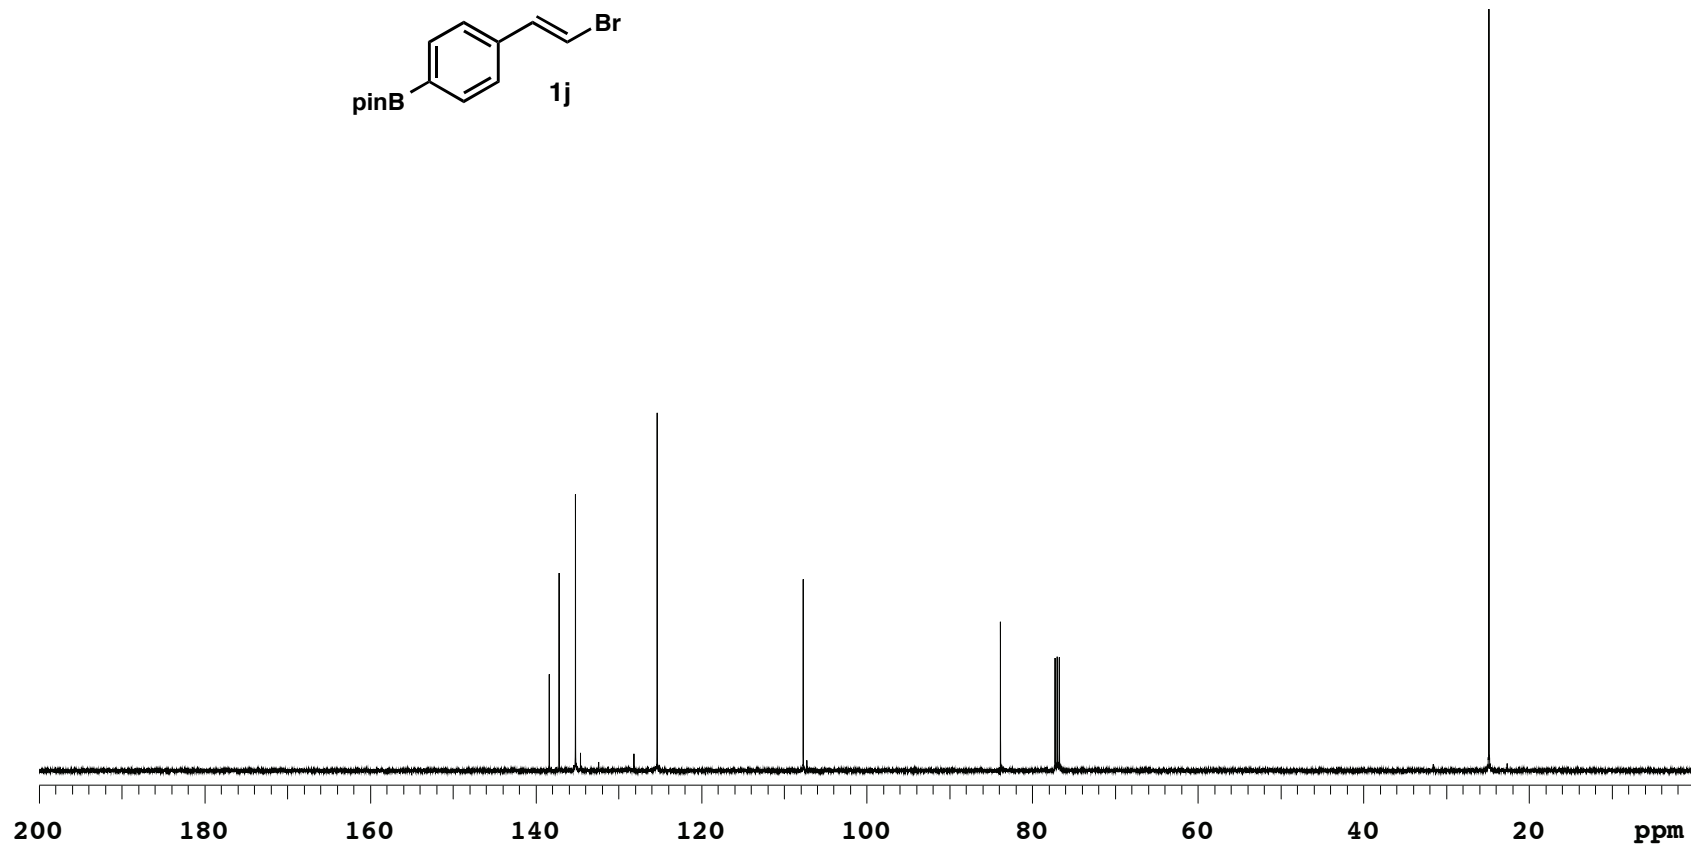

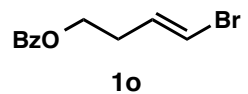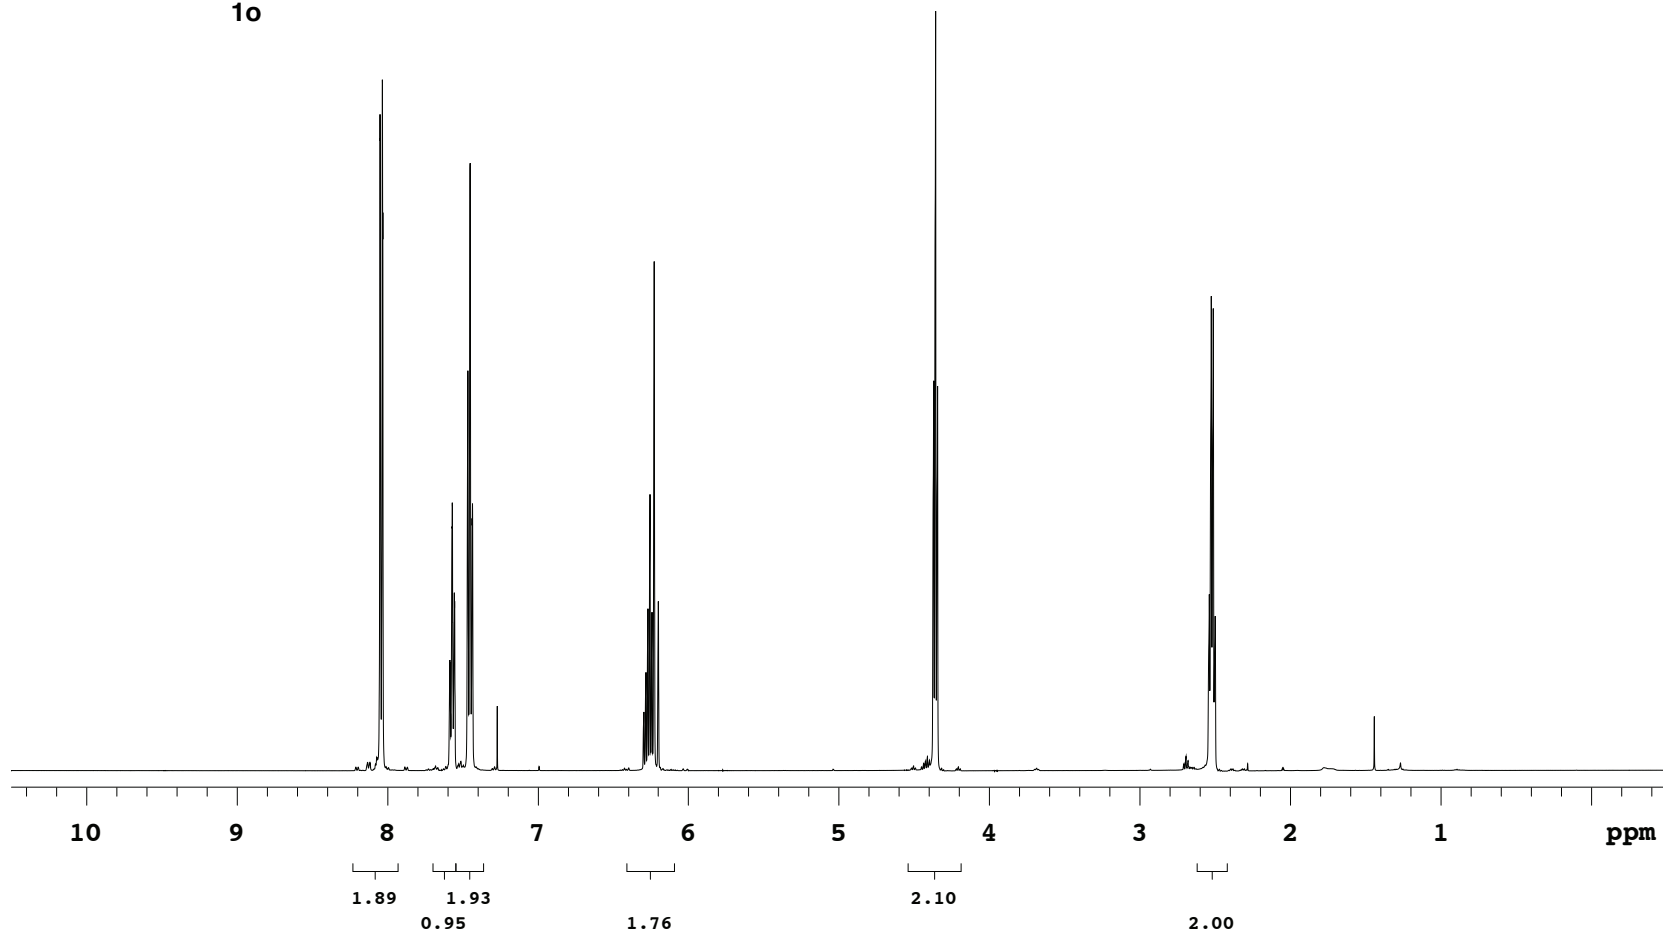

ahc-7-231

Sample Name **ahc-7-231**  
Date collected **2014-07-18**

Pulse sequence **CARBON**  
Solvent **cdcl3**

Temperature **25**  
Spectrometer **-vnmrs400**

Study owner **acherney**  
Operator **autouser**

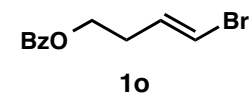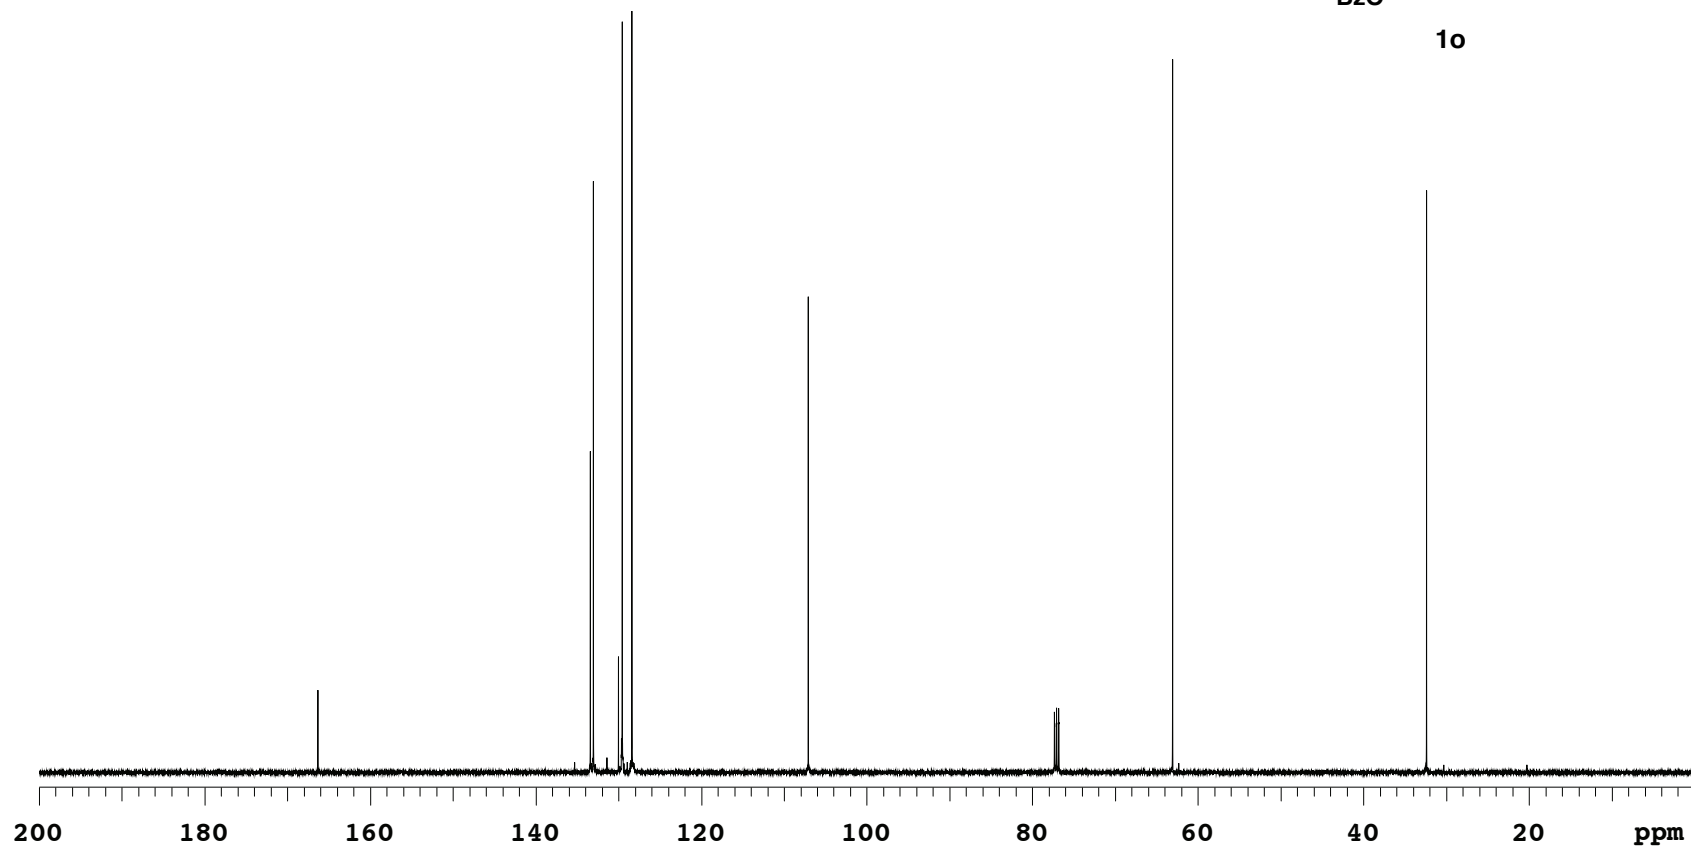

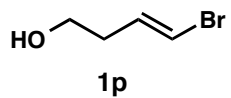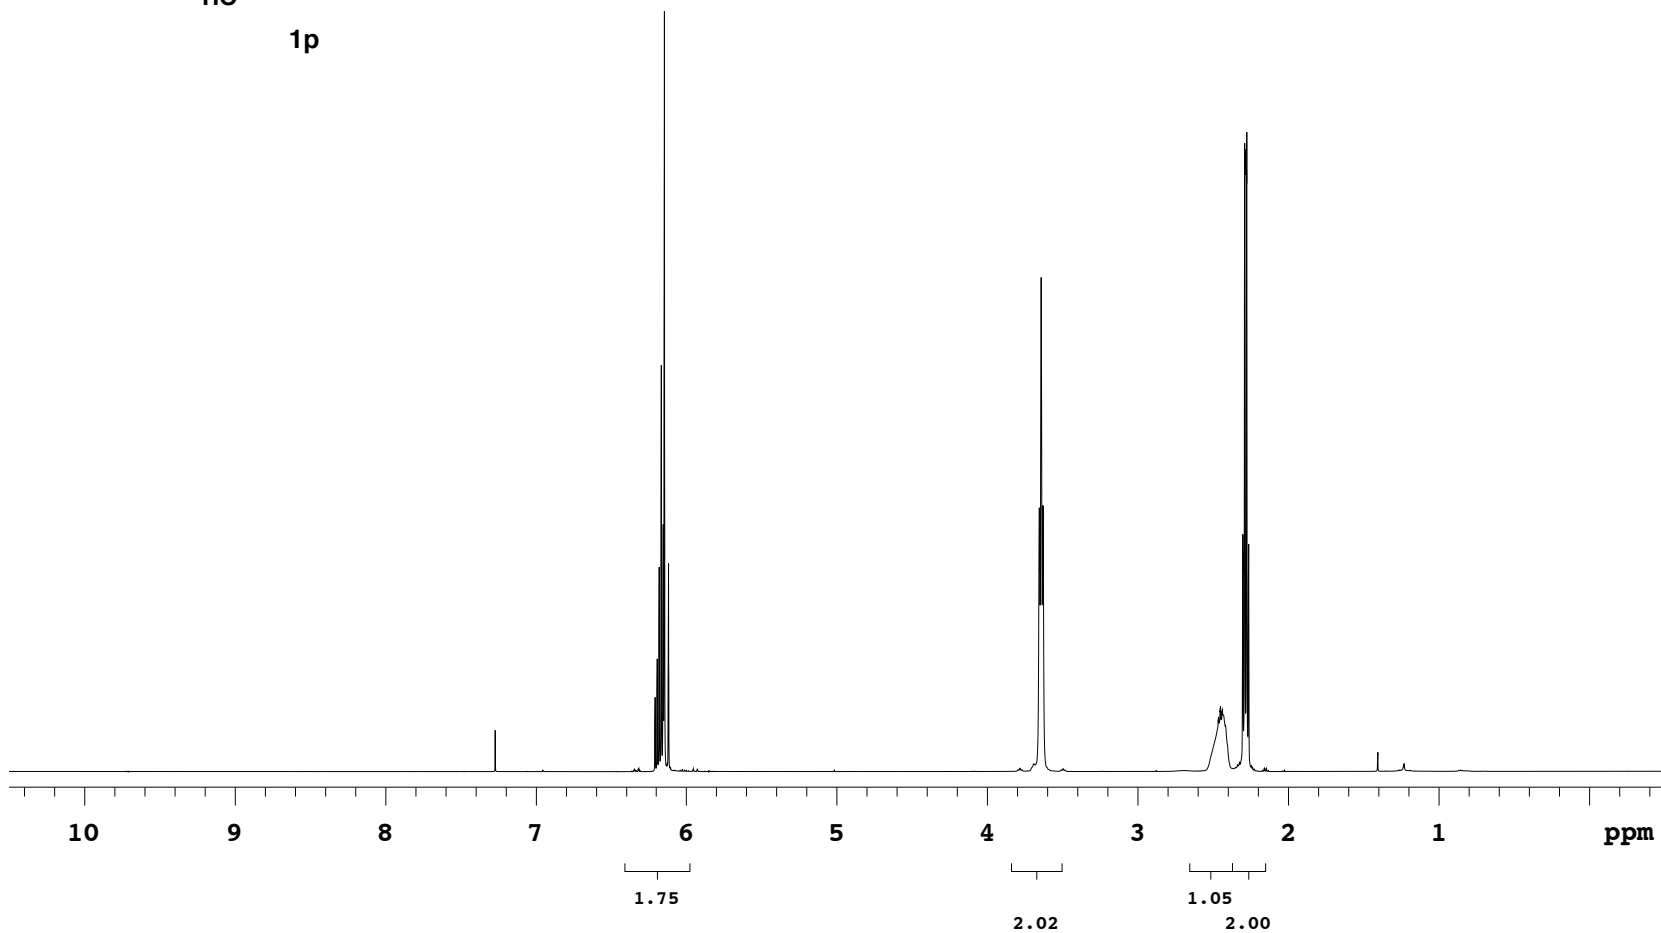

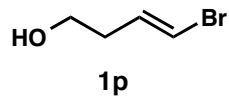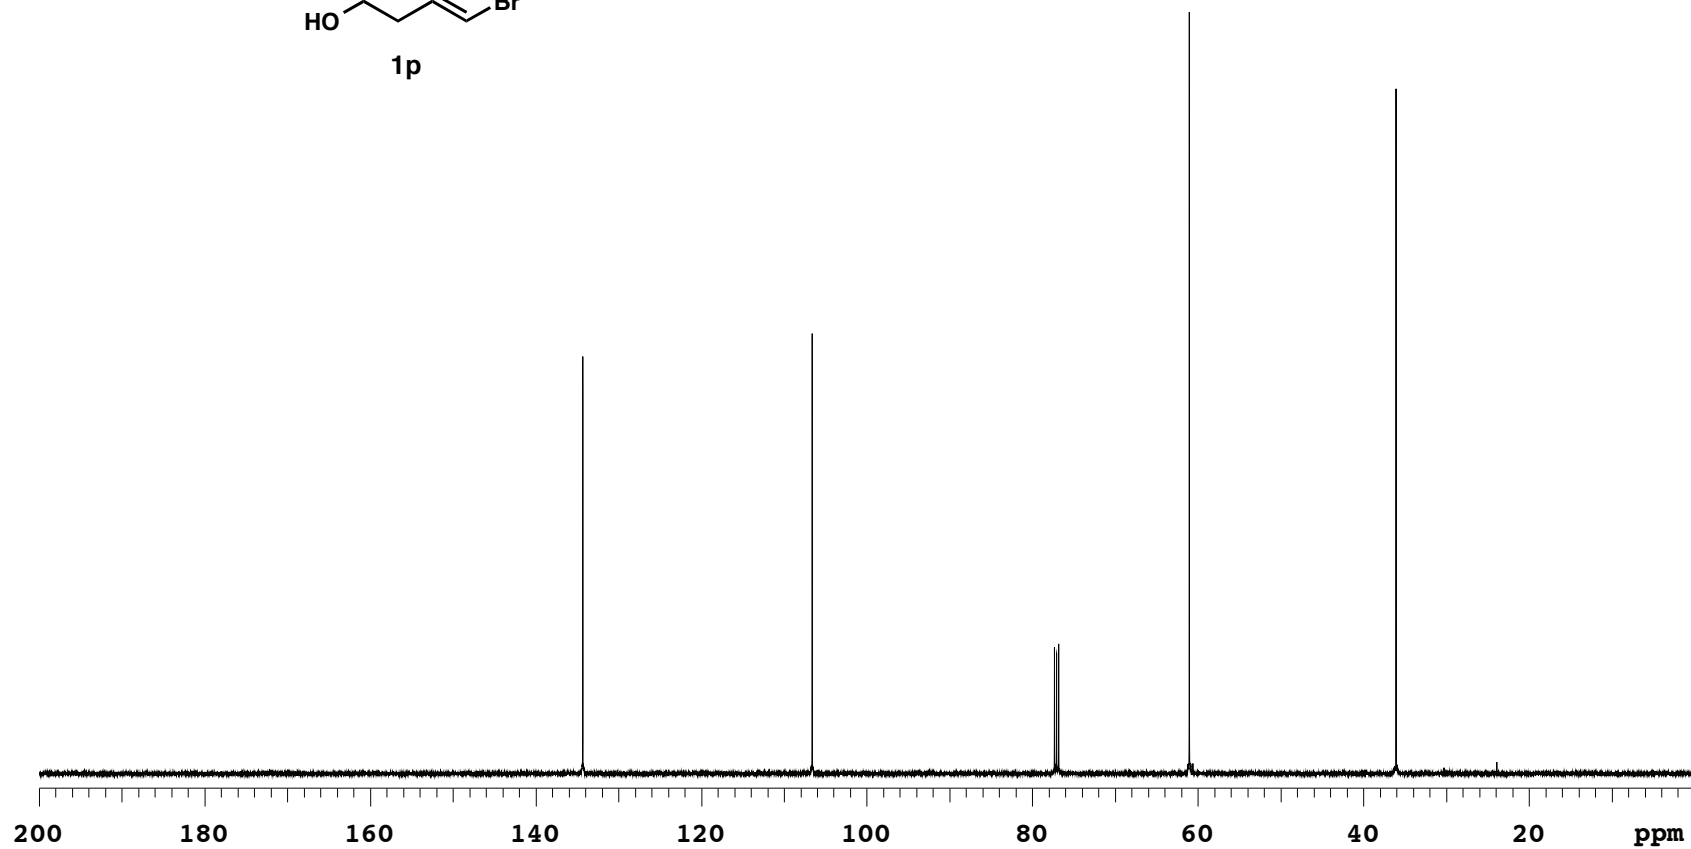

ahc-7-207

Sample Name **ahc-7-207**  
Date collected **2014-07-31**

Pulse sequence **PROTON**  
Solvent **cdcl3**

Temperature **25**  
Spectrometer **-vnmrs400**

Study owner **acherney**  
Operator **autouser**

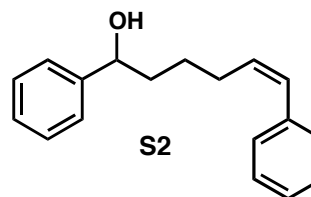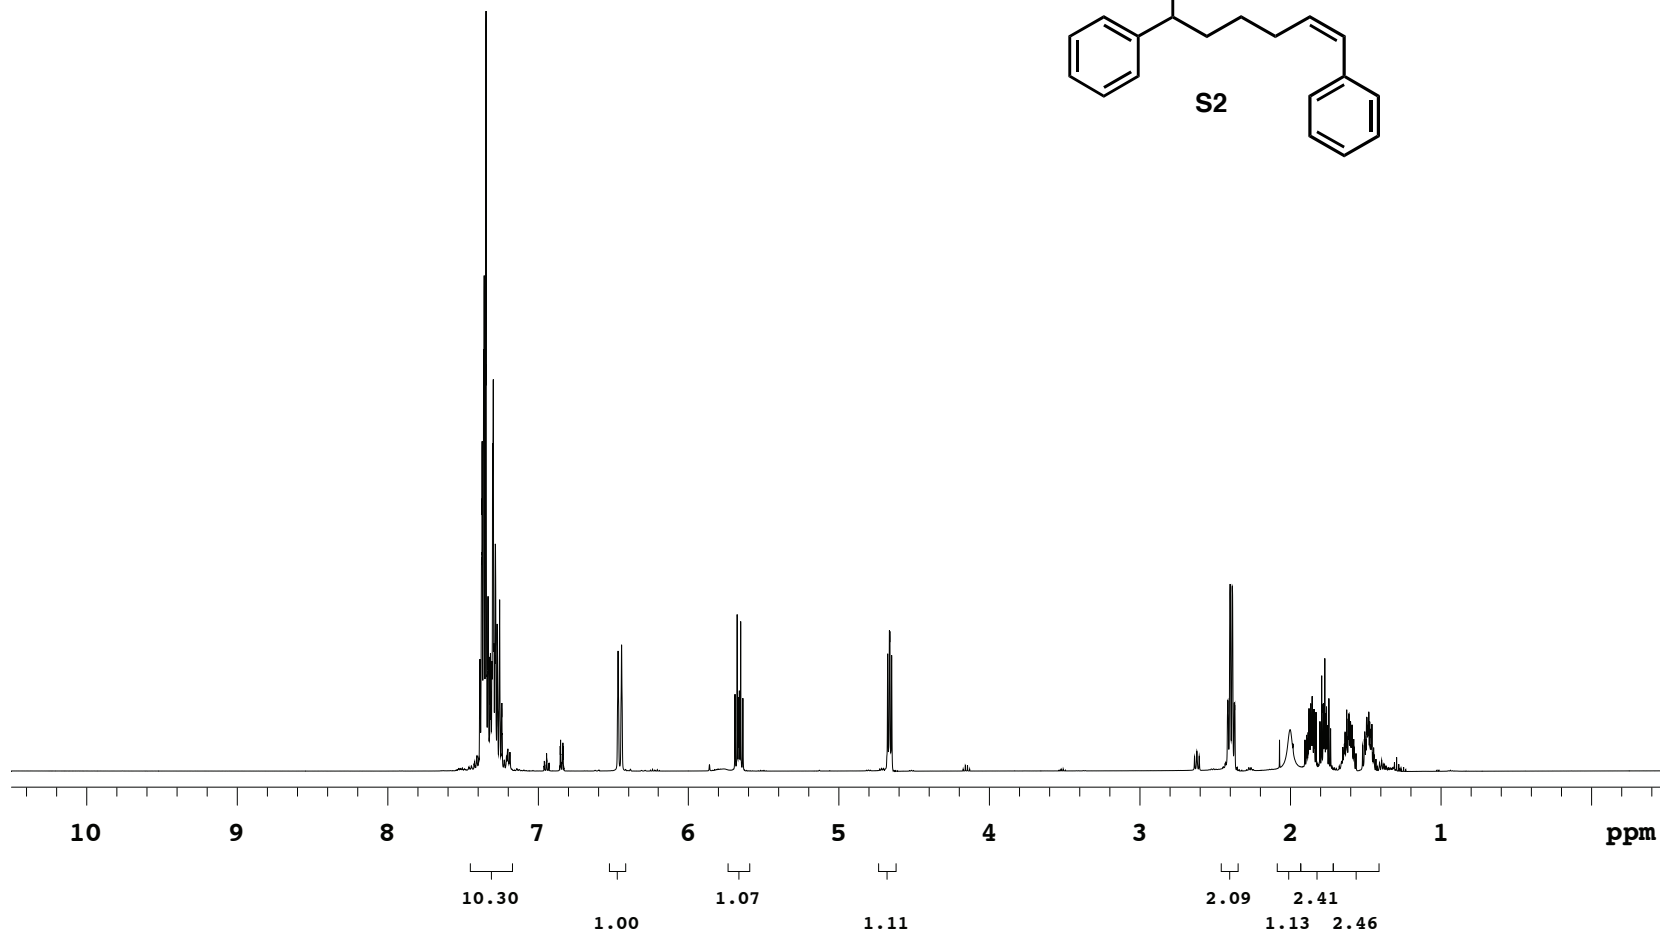

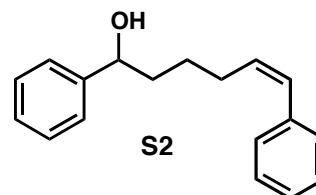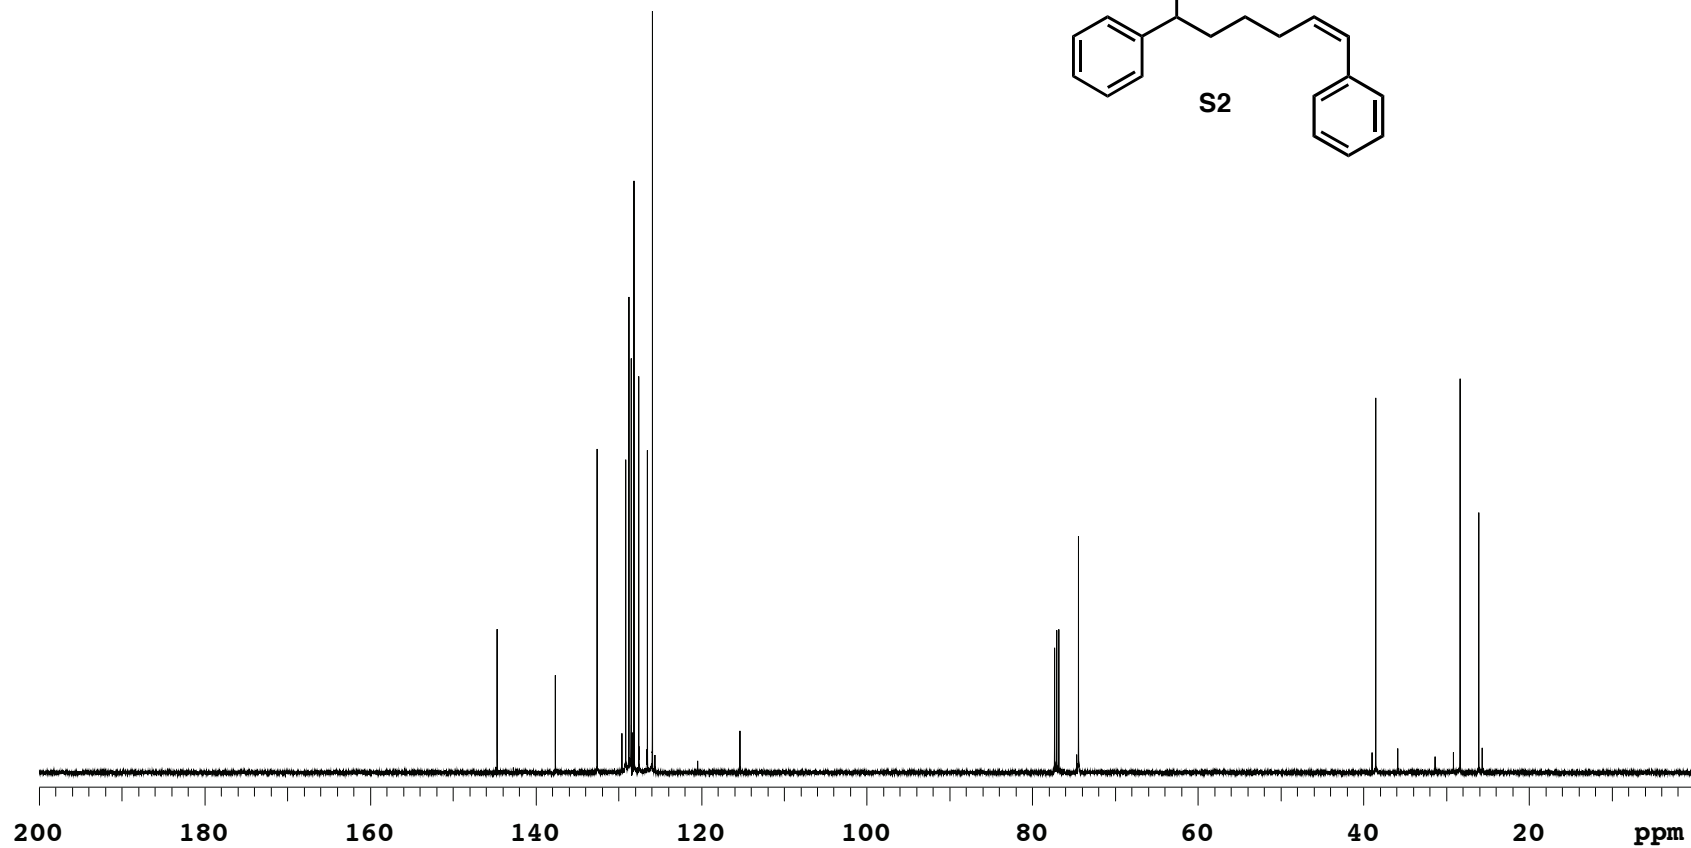



ahc-7-211

Sample Name **ahc-7-211**  
Date collected **2014-07-31**

Pulse sequence **PROTON**  
Solvent **cdcl3**

Temperature **25**  
Spectrometer **-vnmrs400**

Study owner **acherney**  
Operator **autouser**

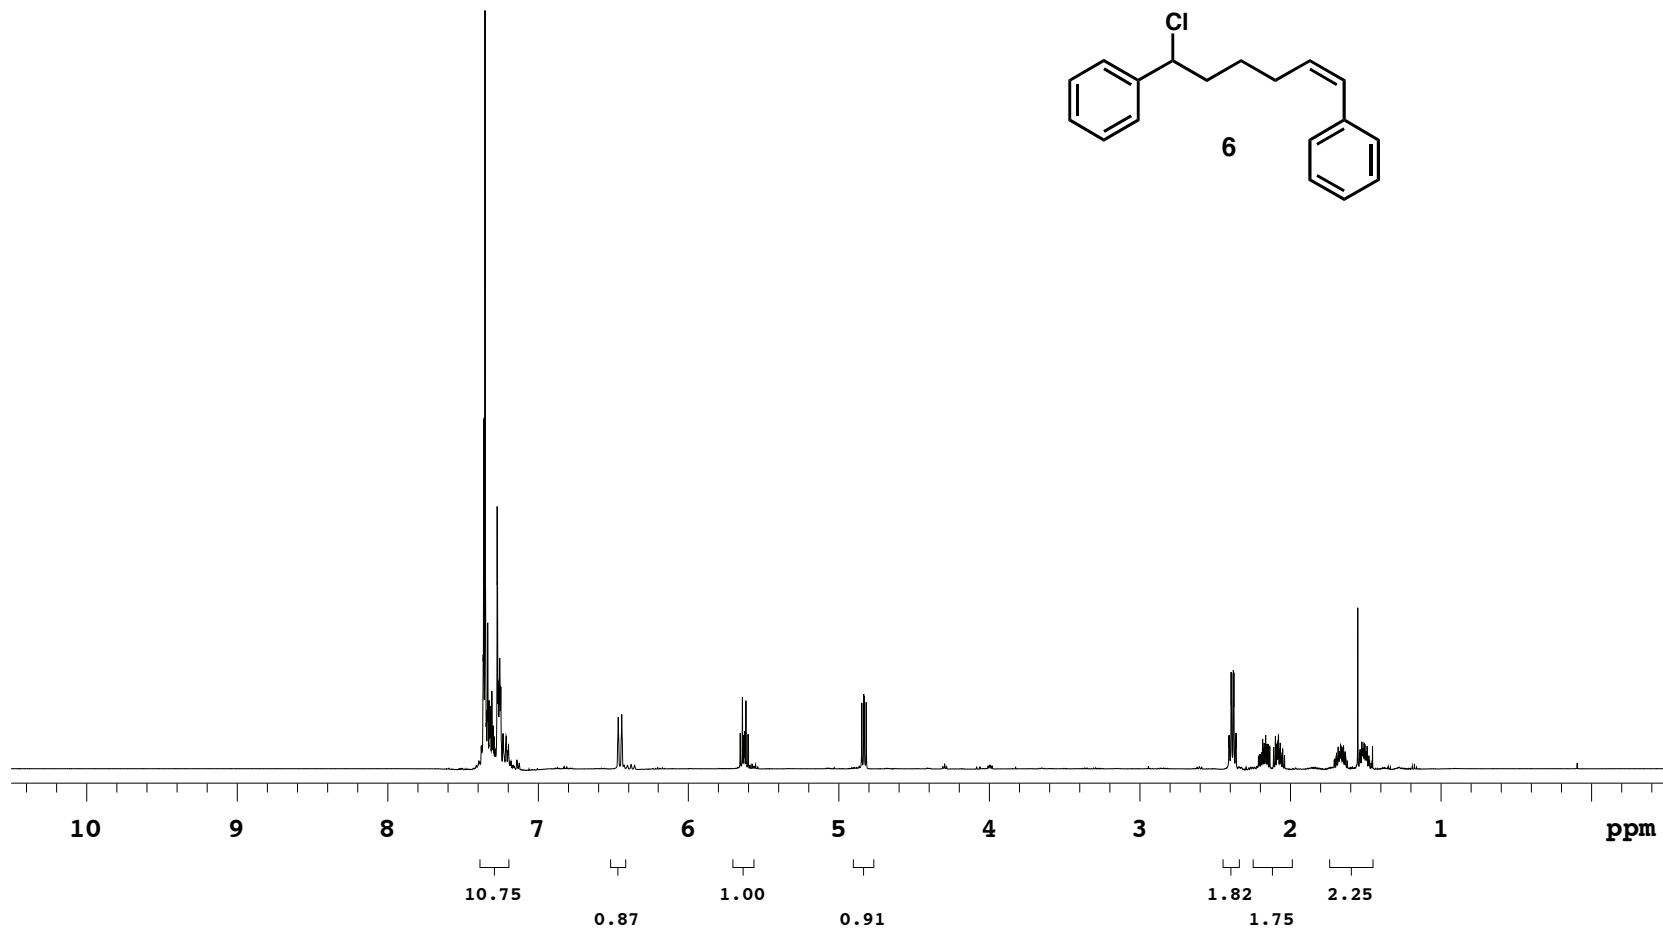

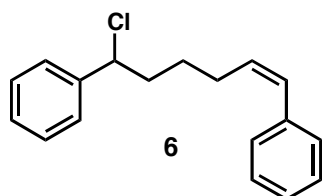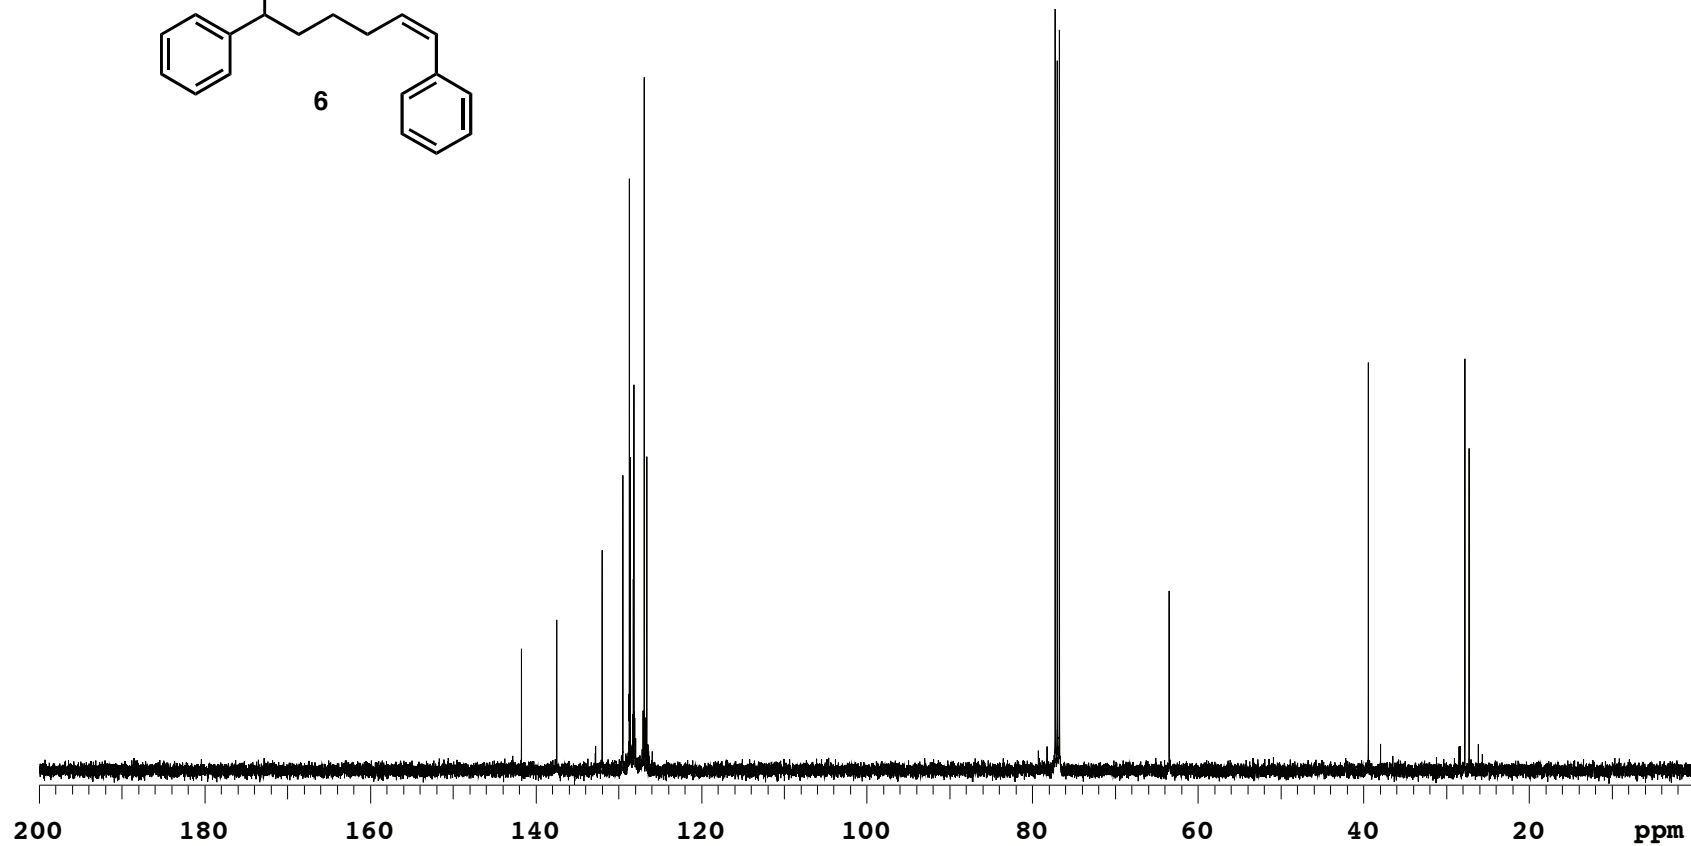

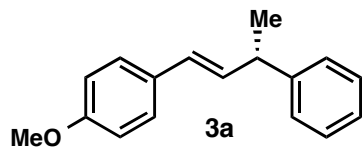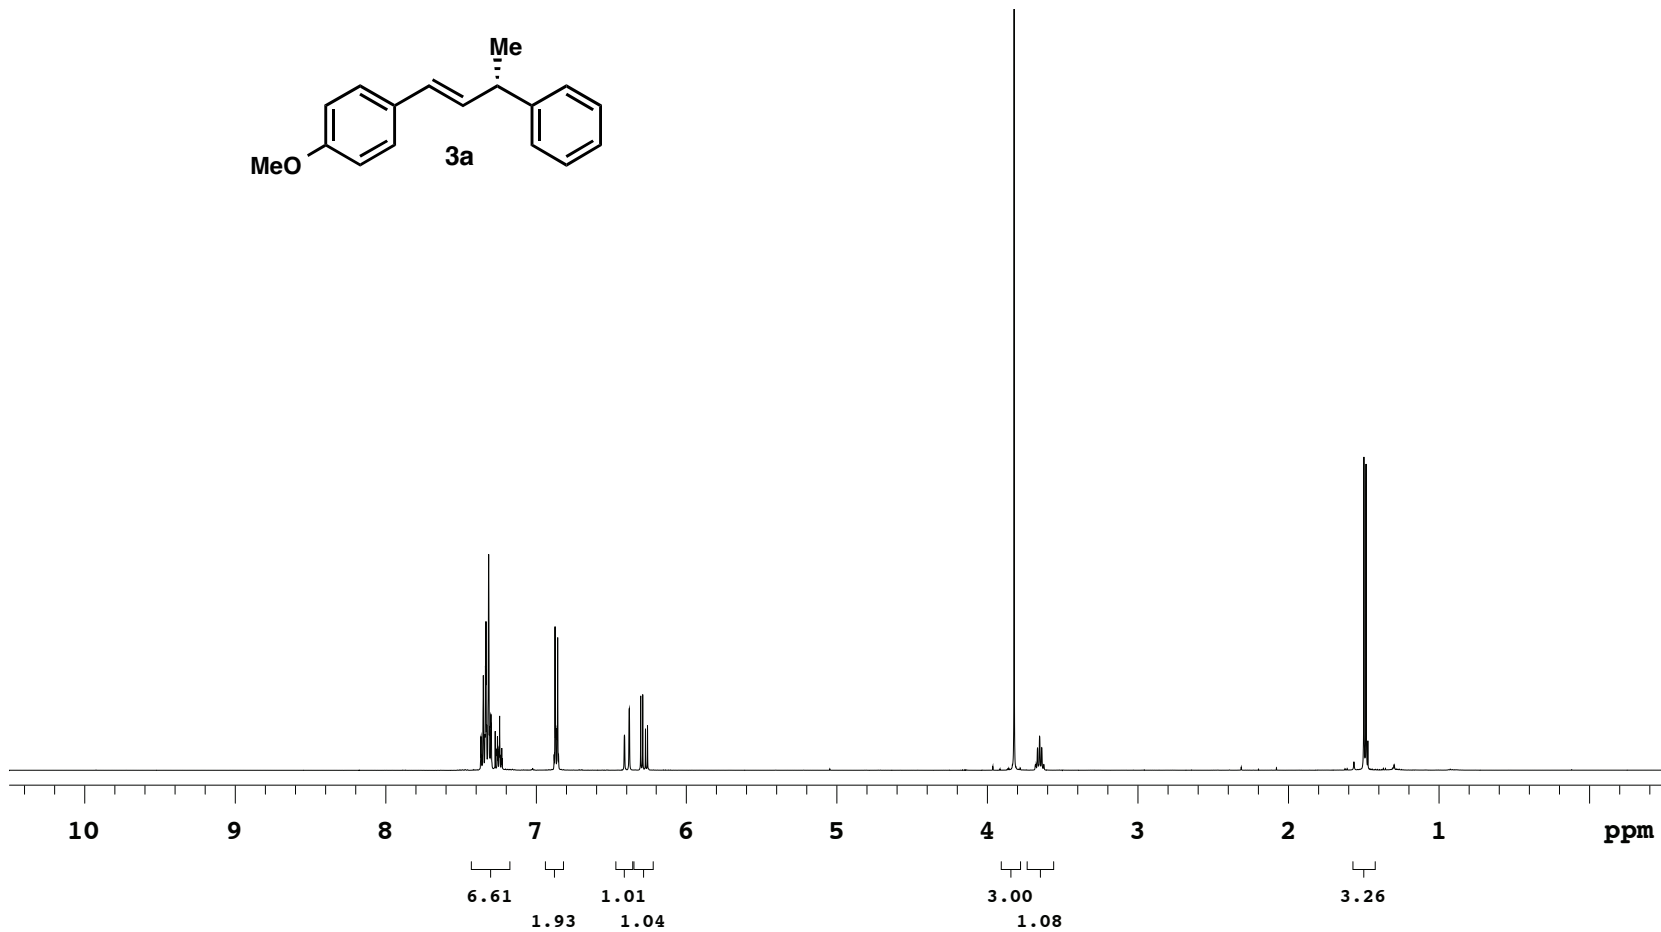

ahc-7-131-8

Sample Name **ahc-7-131-8**  
Date collected **2014-05-12**

Pulse sequence **CARBON**  
Solvent **cdcl3**

Temperature **25**  
Spectrometer **-vnmrs400**

Study owner **acherney**  
Operator **autouser**

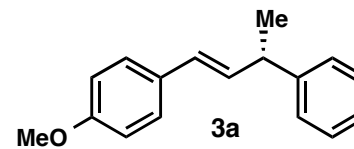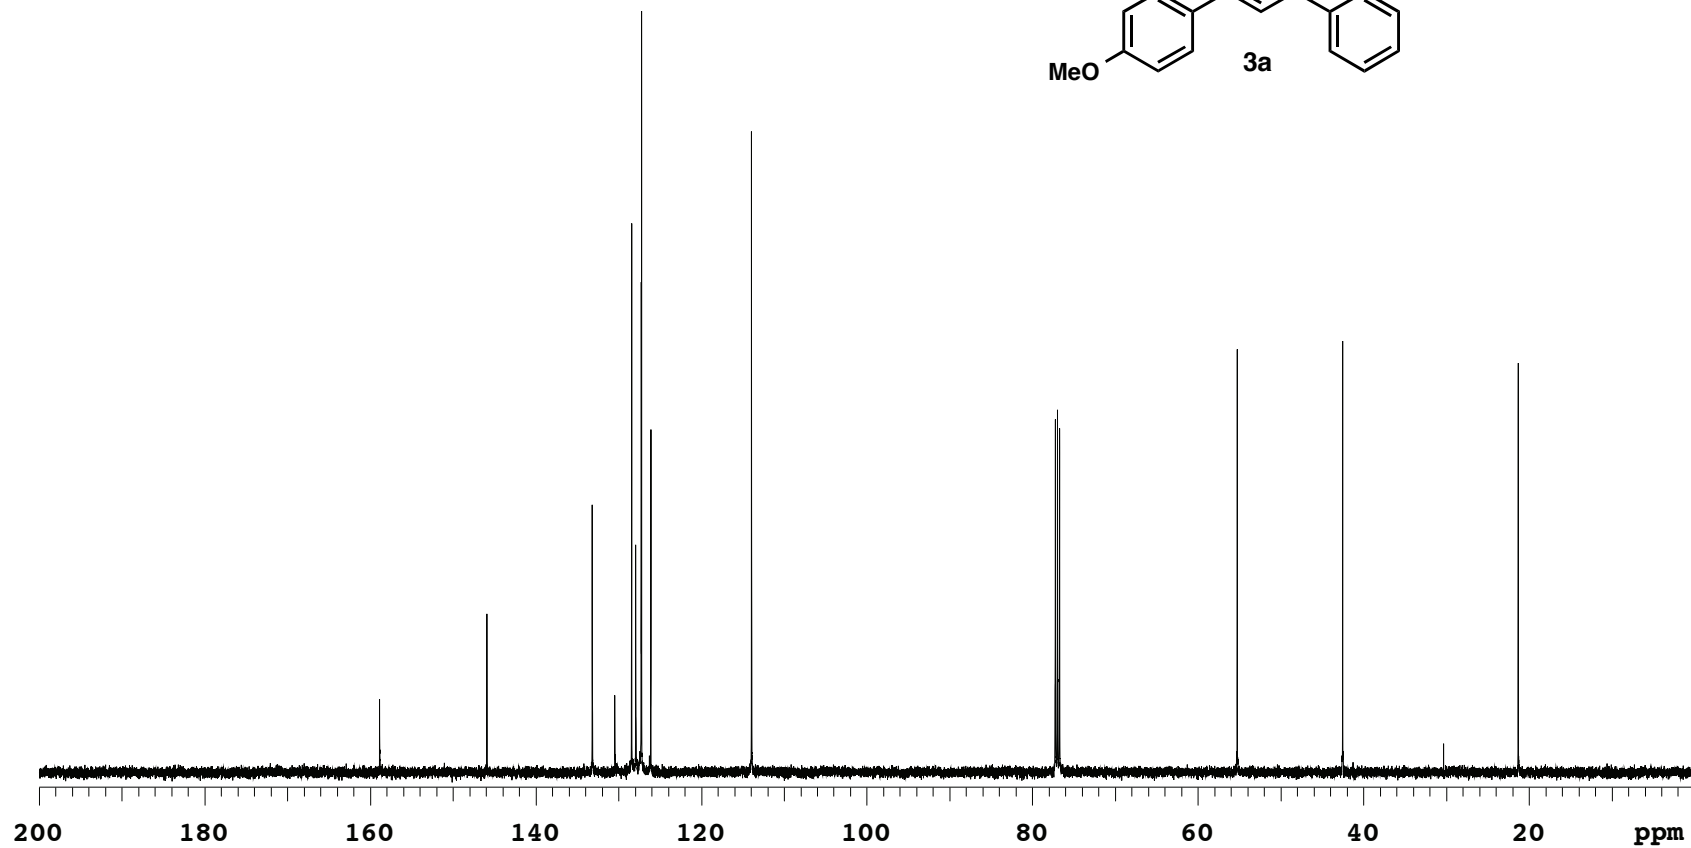

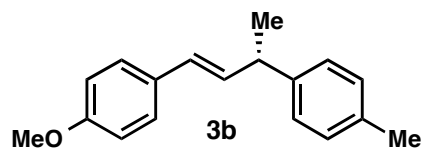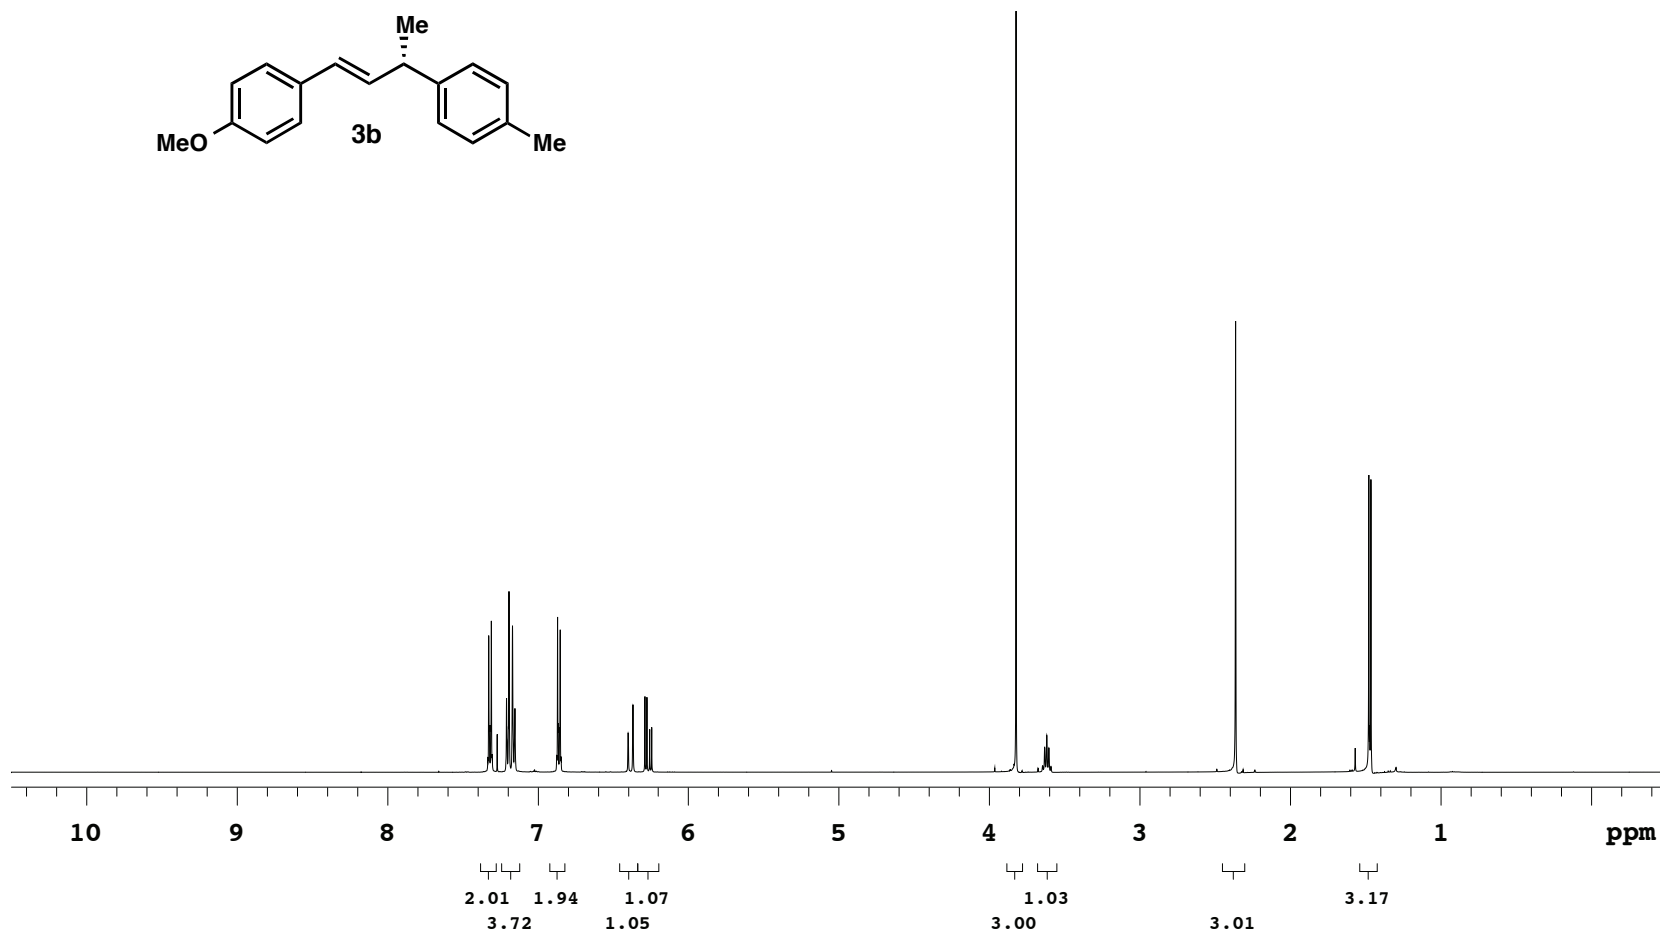

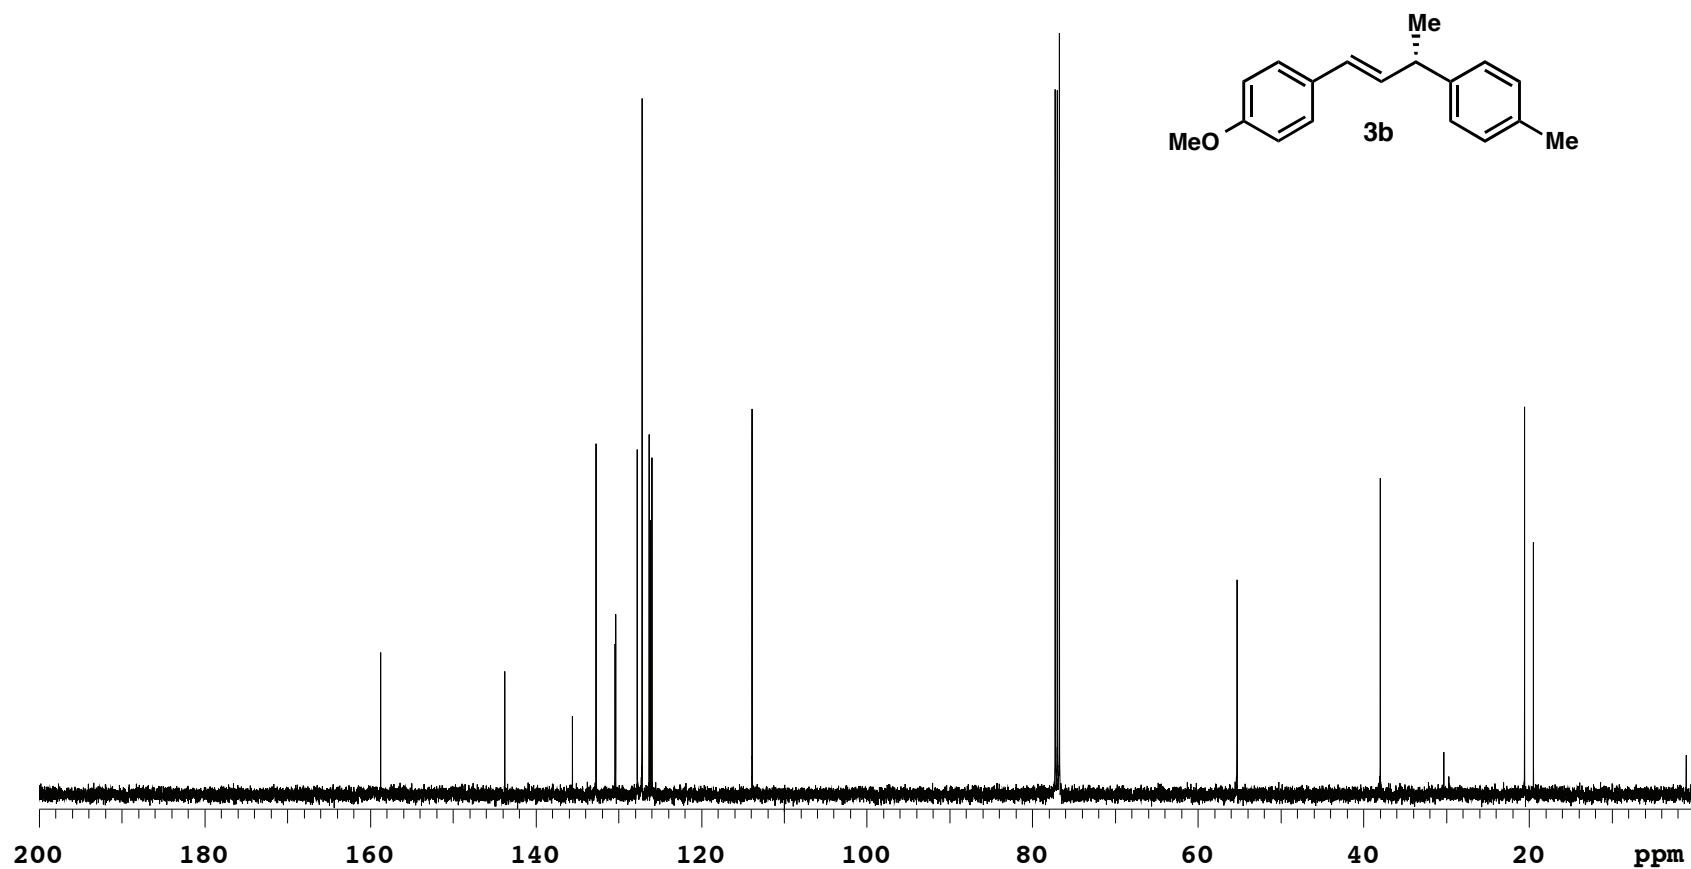

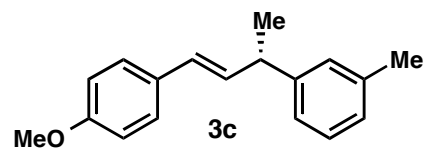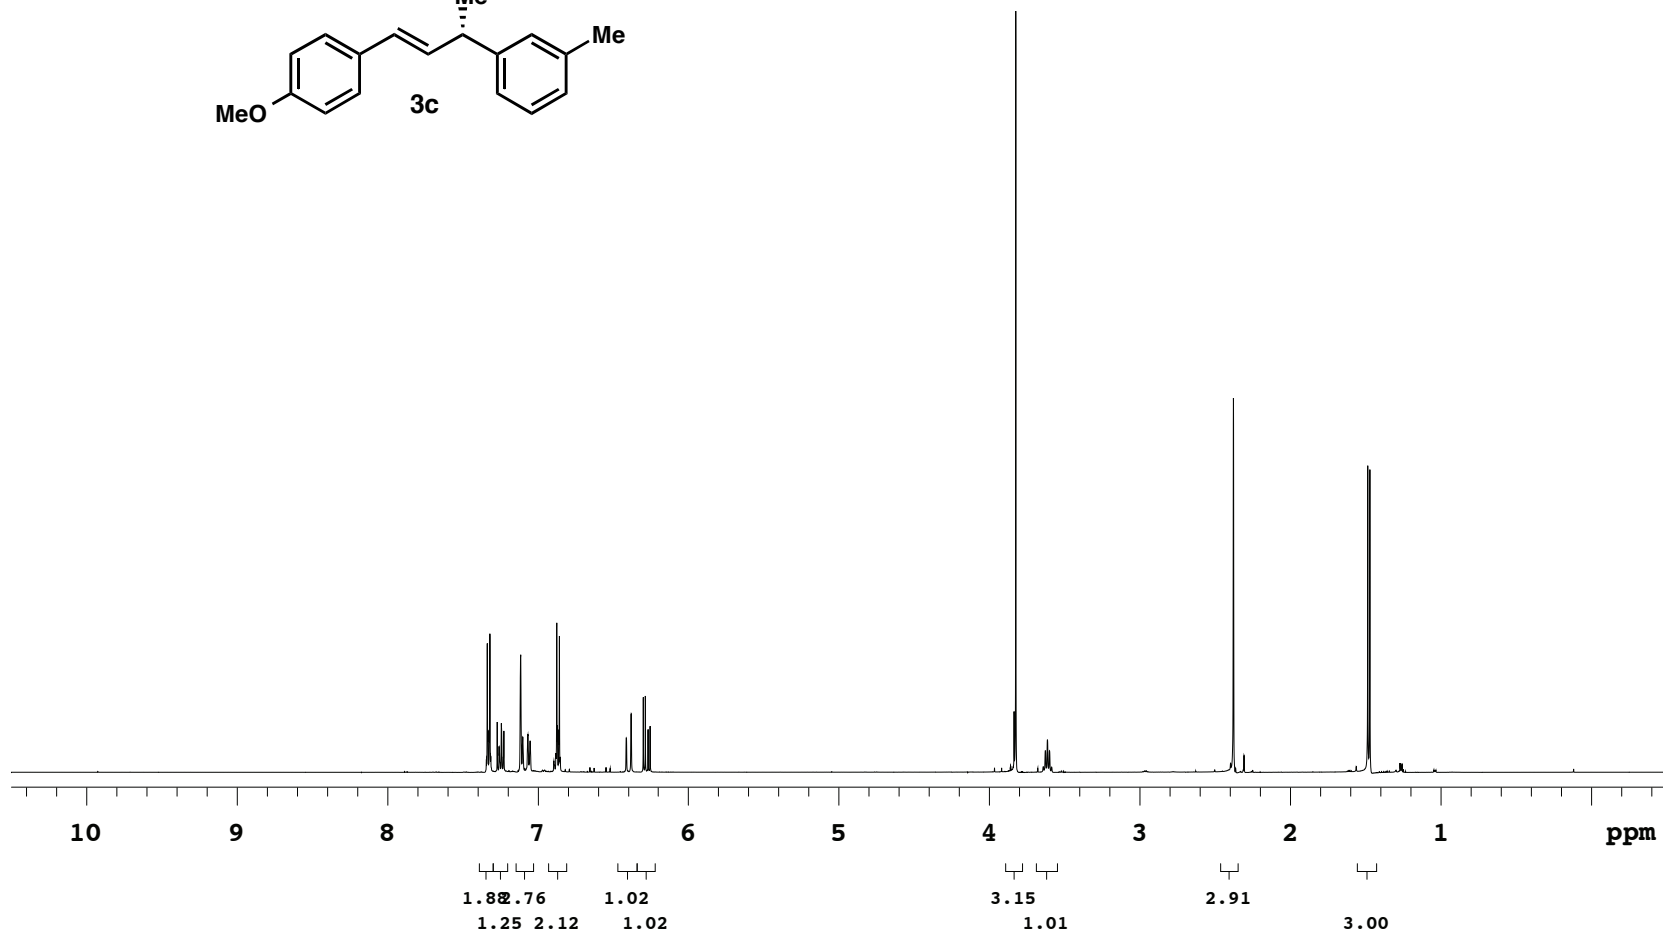

ahc-7-185-2

Sample Name **ahc-7-185-2**  
Date collected **2014-05-01**

Pulse sequence **CARBON**  
Solvent **cdcl3**

Temperature **25**  
Spectrometer **-vnmrs400**

Study owner **acherney**  
Operator **autouser**

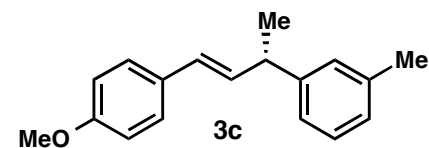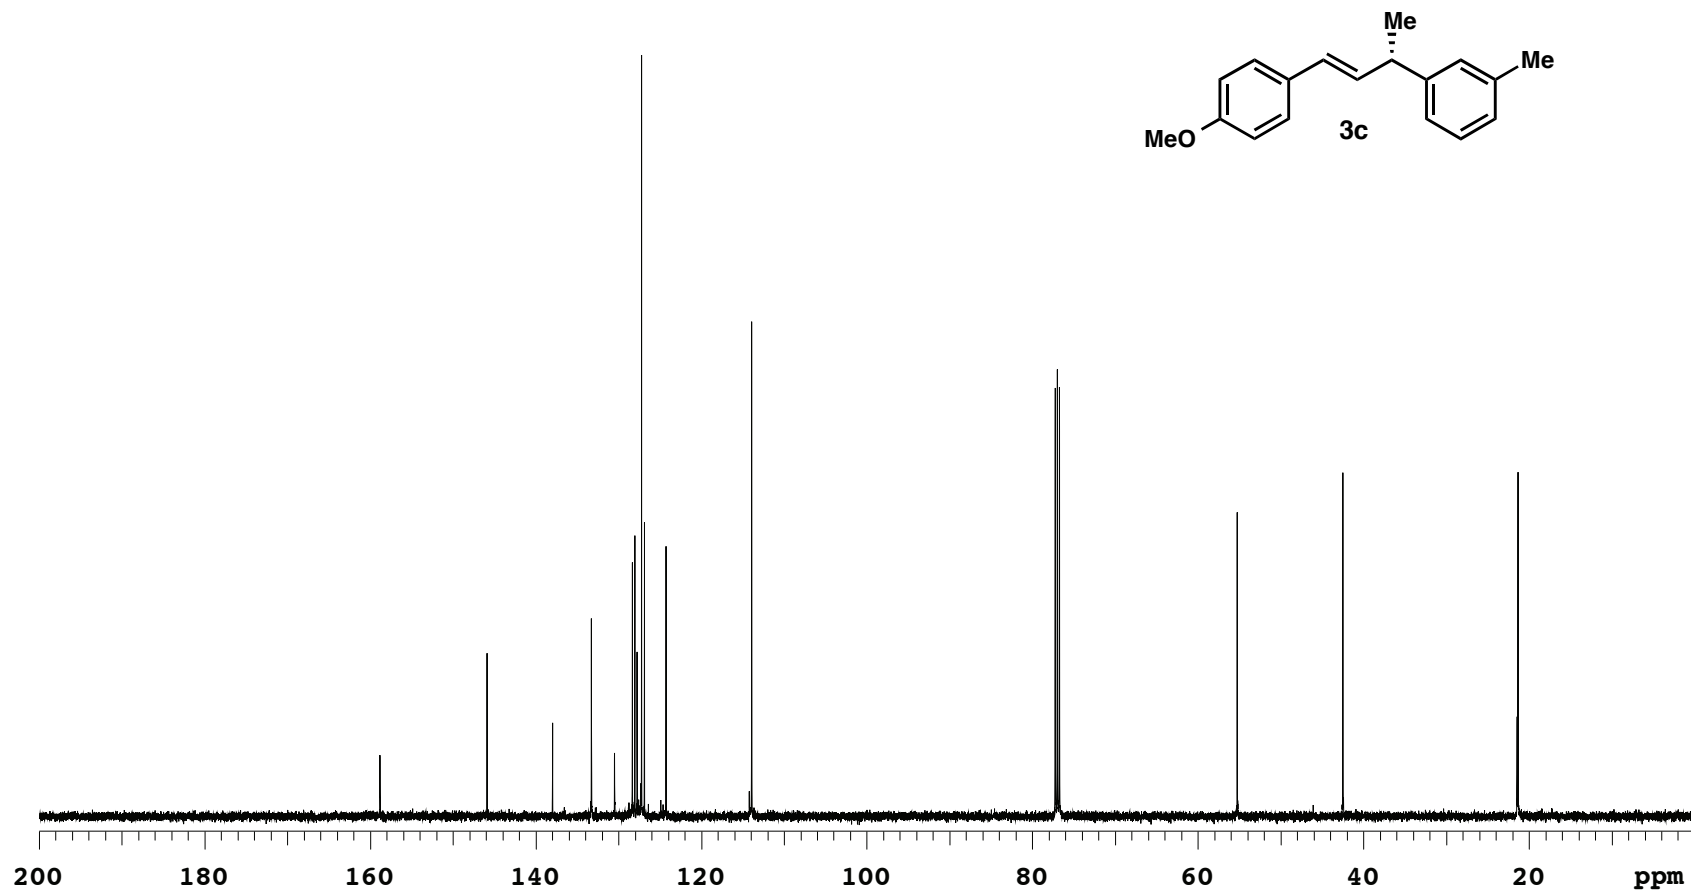



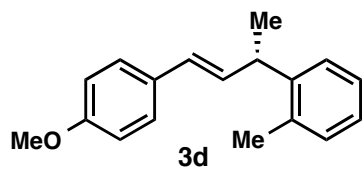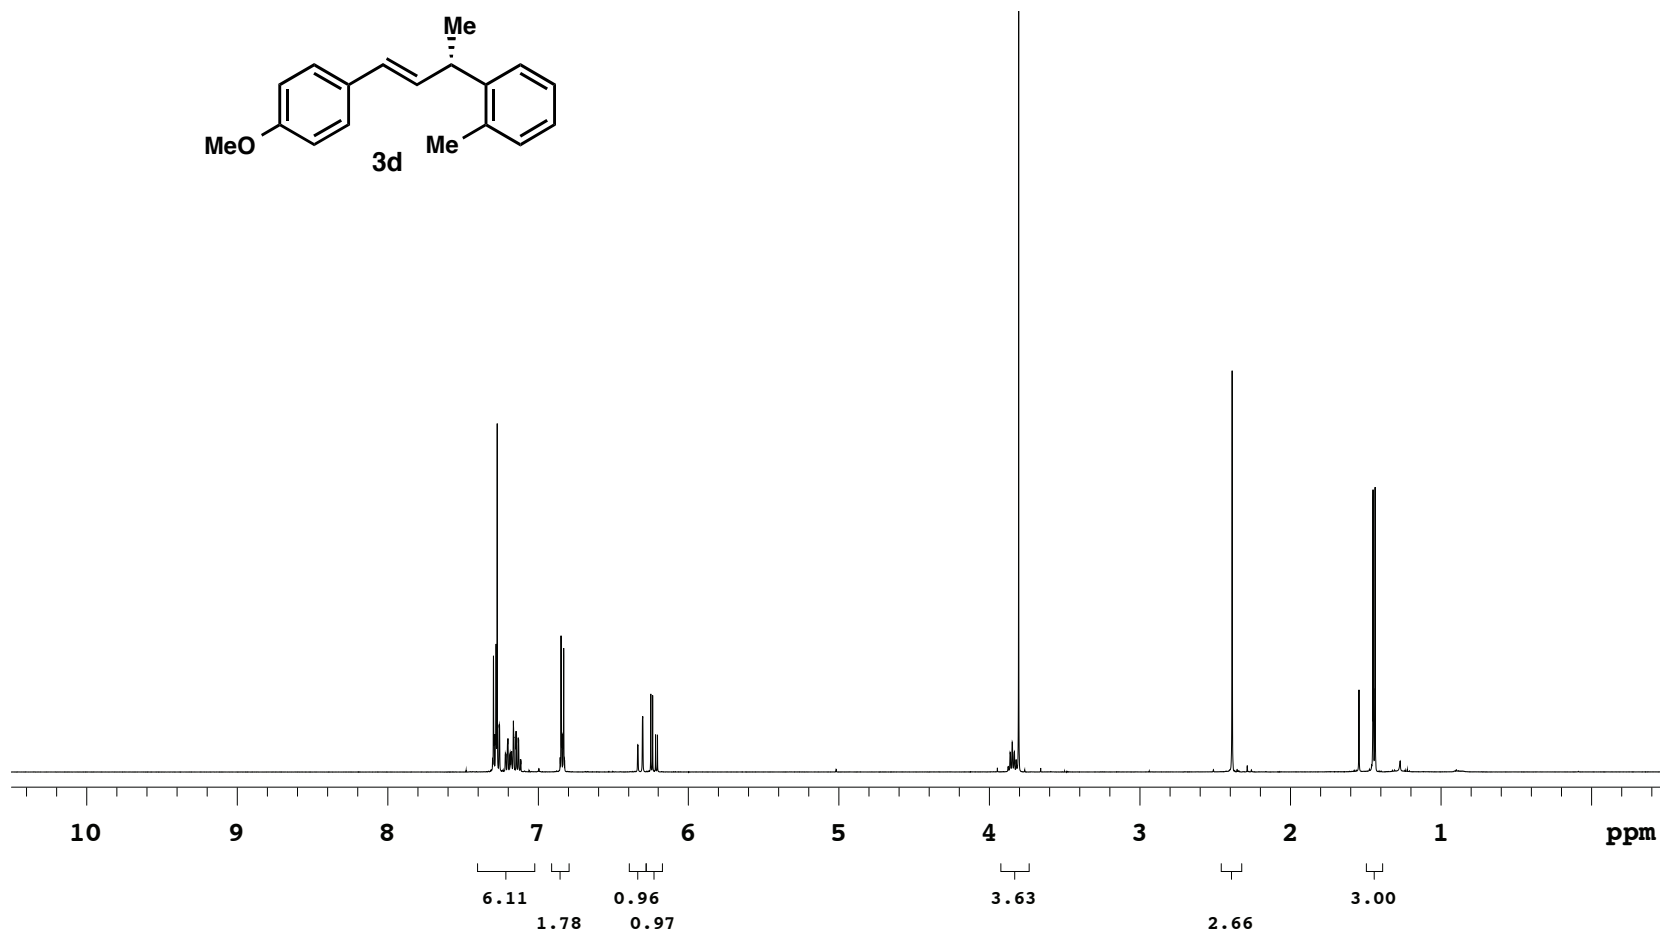

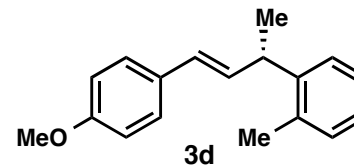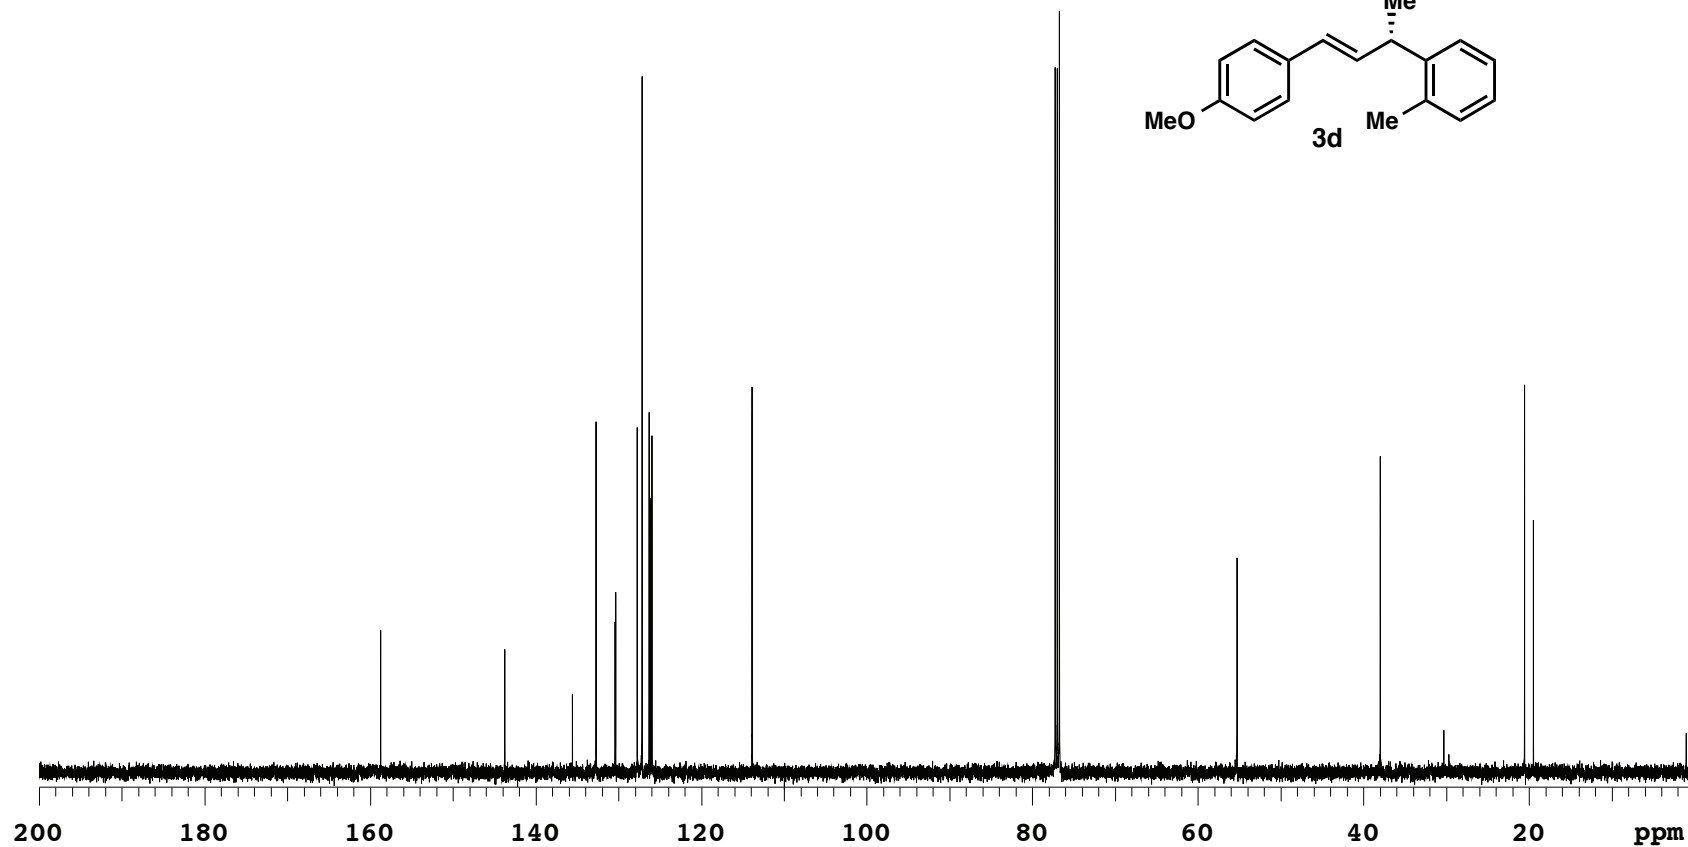

ahc-7-185-4

Sample Name **ahc-7-185-4**  
Date collected **2014-05-02**

Pulse sequence **PROTON**  
Solvent **cdcl3**

Temperature **25**  
Spectrometer **-vnmrs400**

Study owner **acherney**  
Operator **autouser**

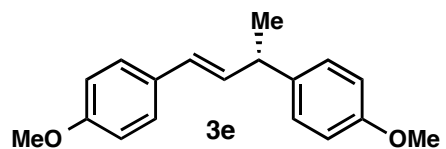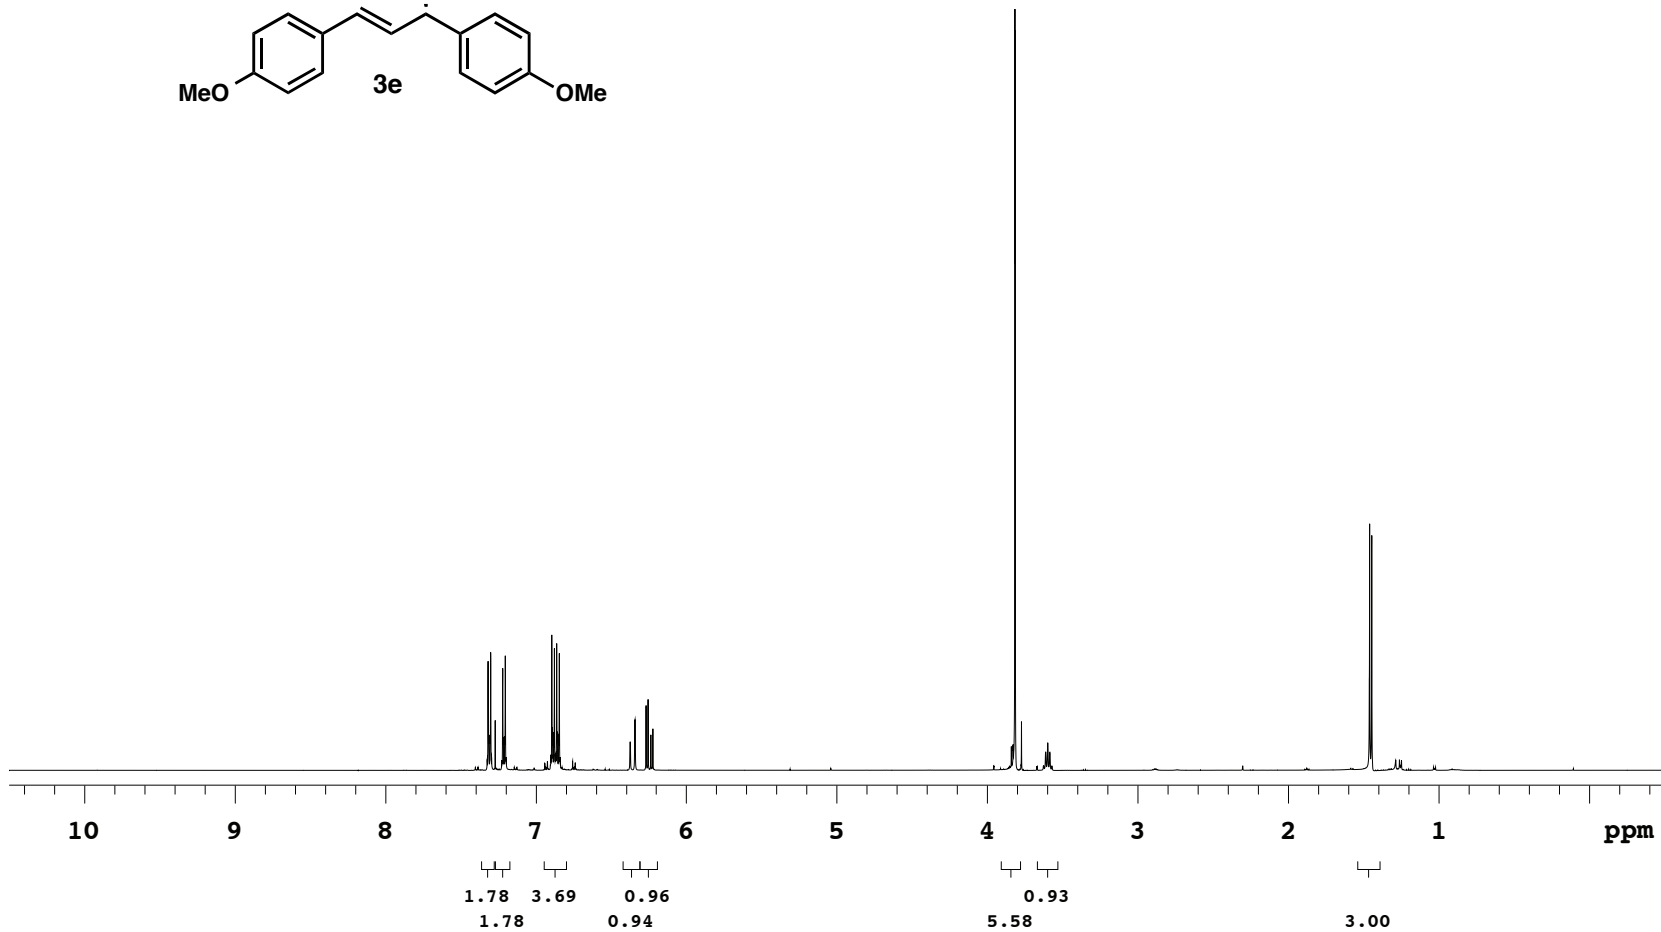

ahc-7-185-4

Sample Name **ahc-7-185-4**  
Date collected **2014-05-02**

Pulse sequence **CARBON**  
Solvent **cdcl3**

Temperature **25**  
Spectrometer **-vnmrs400**

Study owner **acherney**  
Operator **autouser**

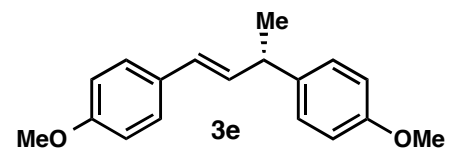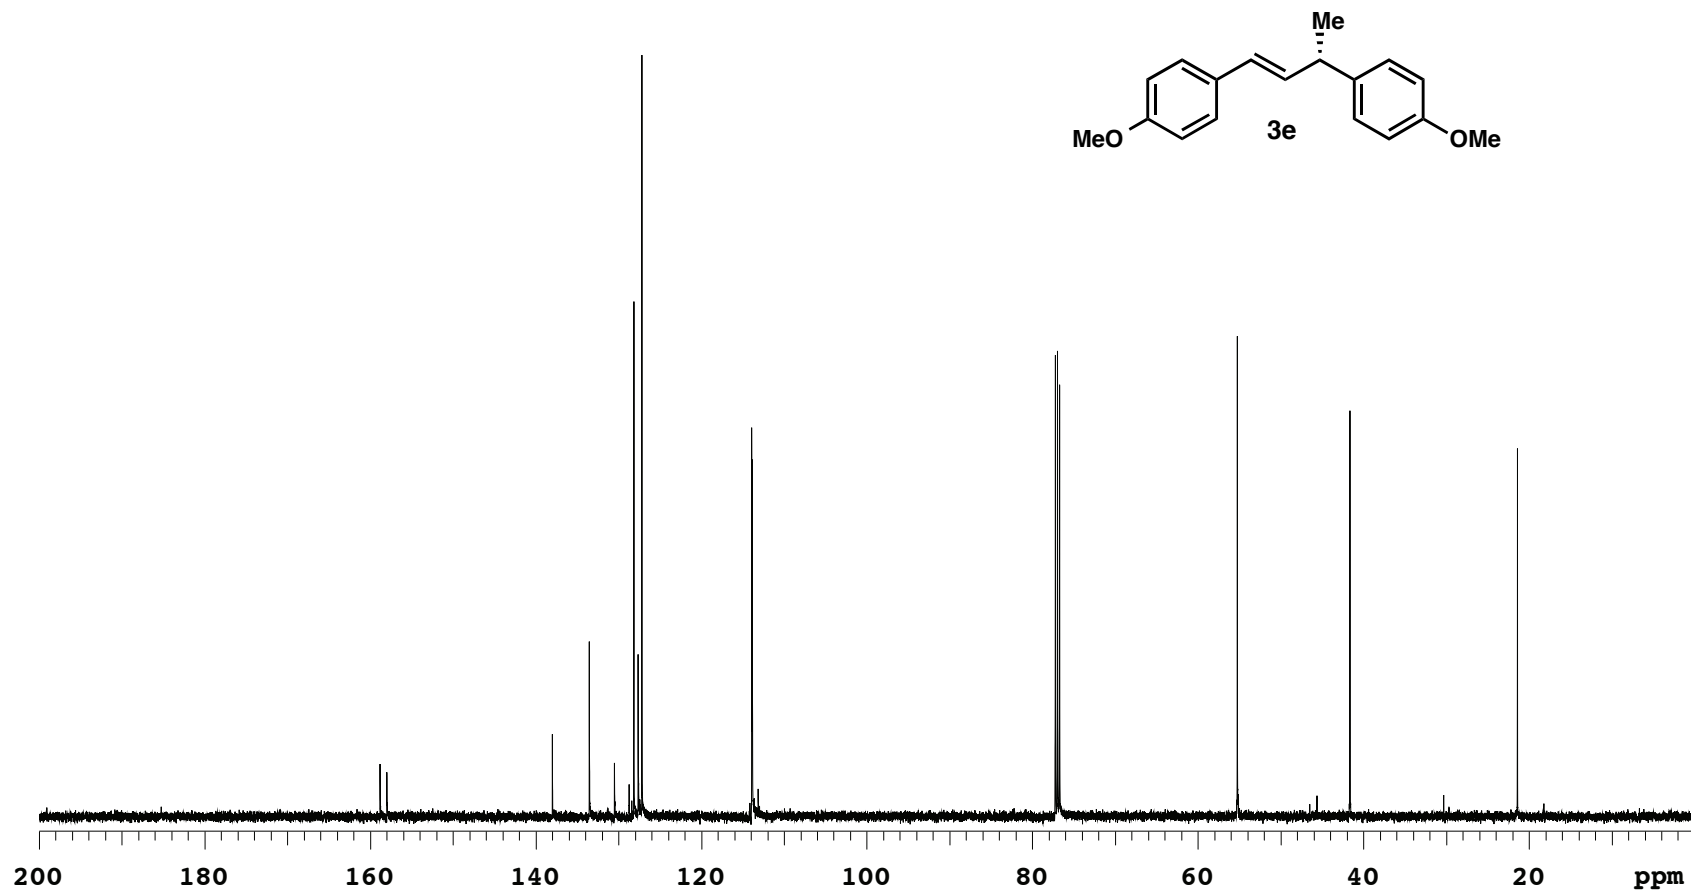

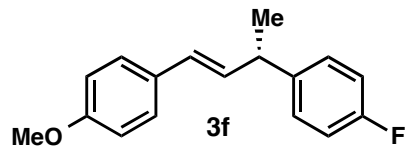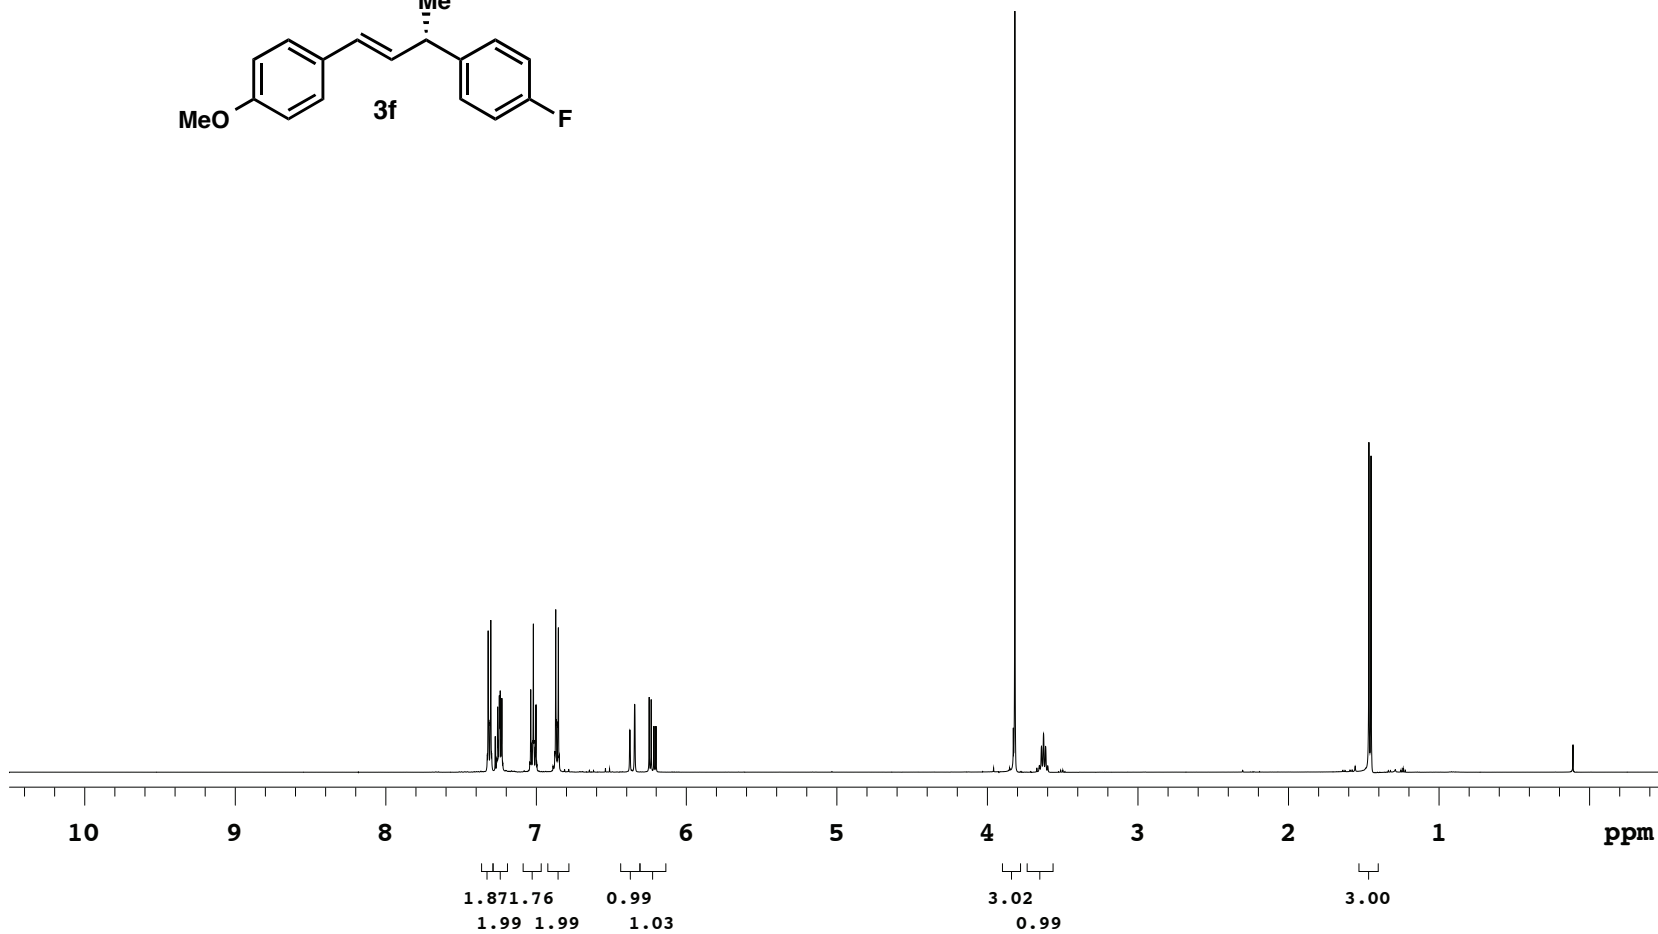

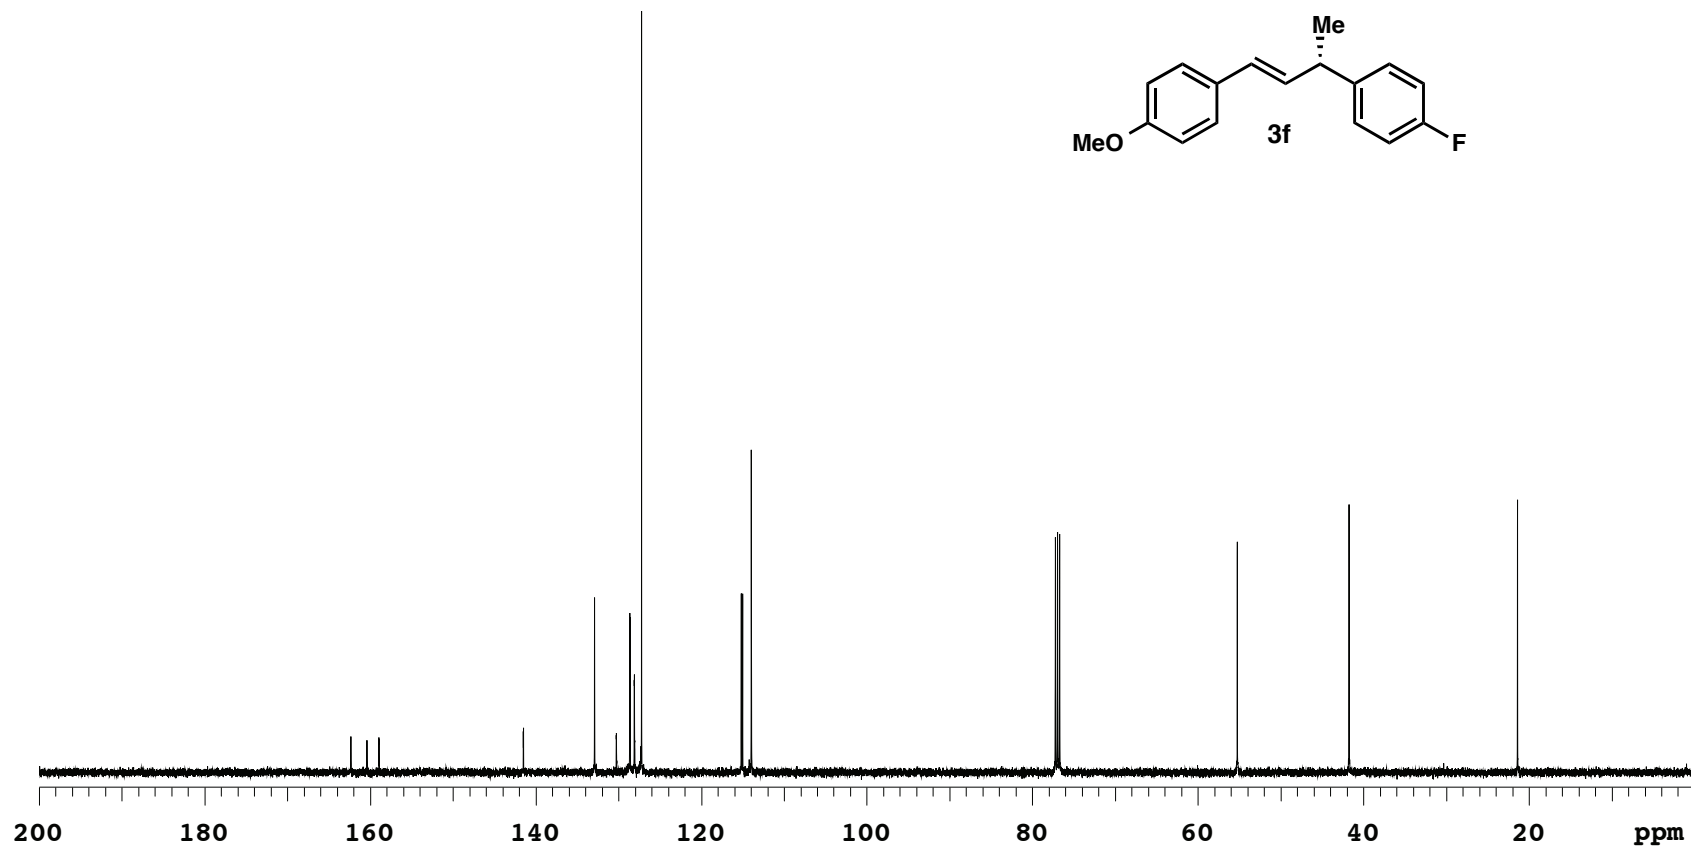

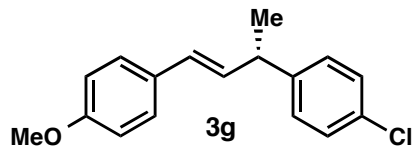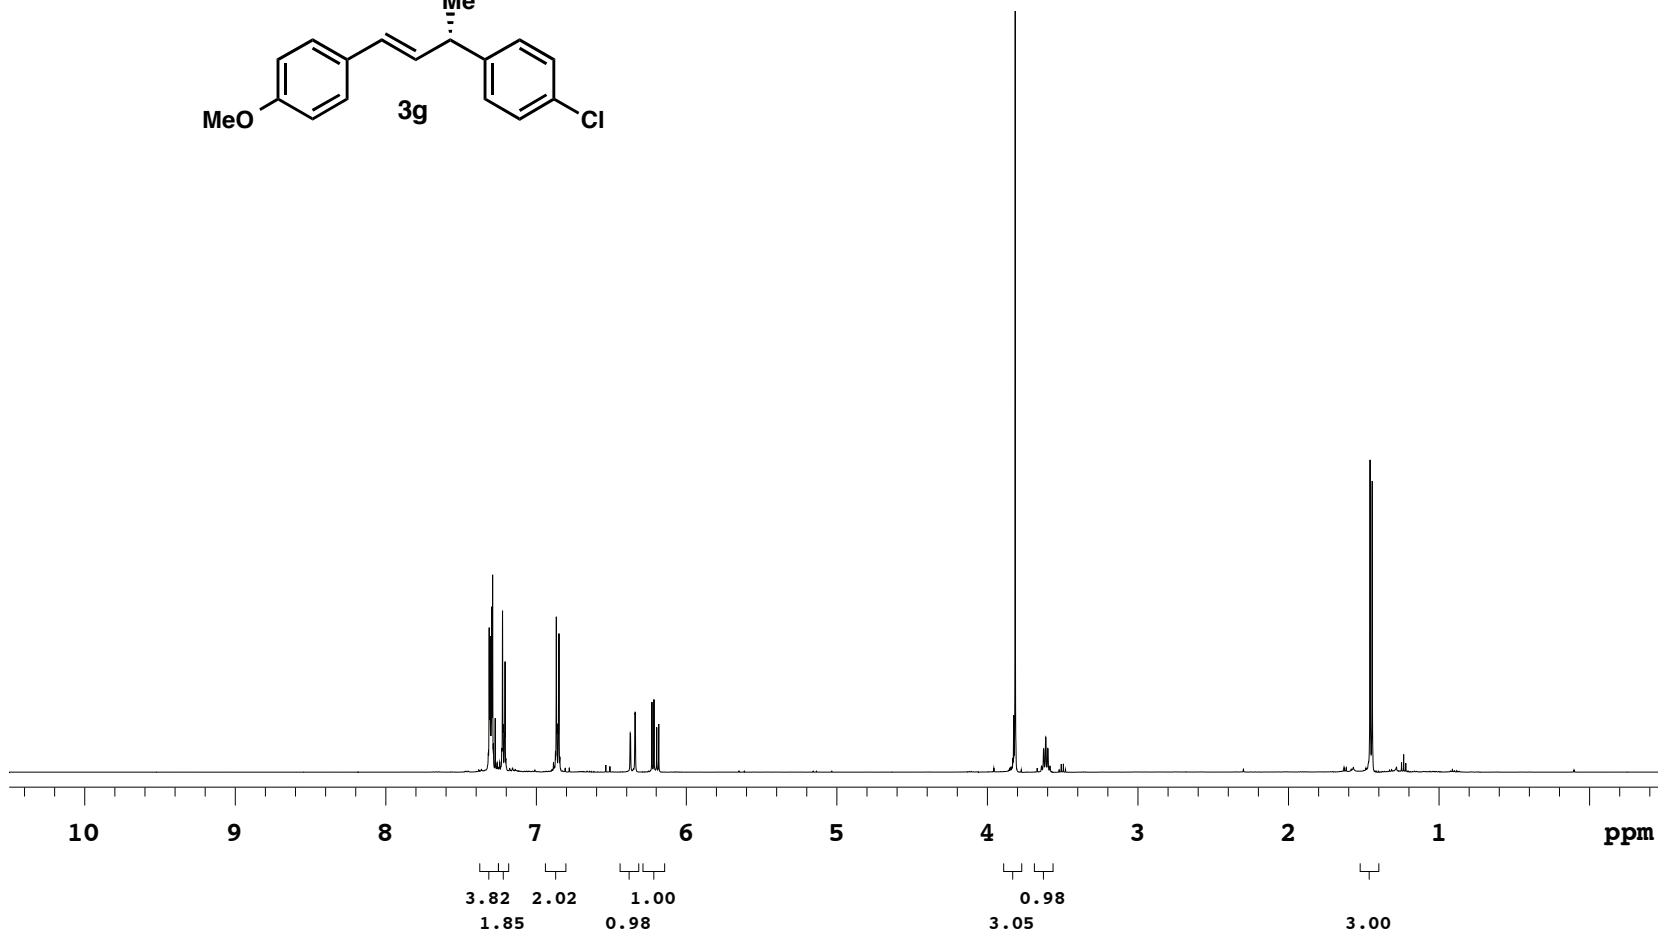

ahc-7-185-7

Sample Name **ahc-7-185-7**  
Date collected **2014-05-05**

Pulse sequence **CARBON**  
Solvent **cdcl3**

Temperature **25**  
Spectrometer **-vnmrs400**

Study owner **acherney**  
Operator **autouser**

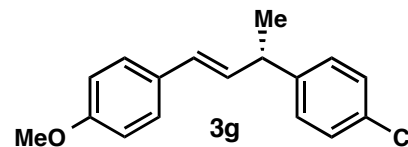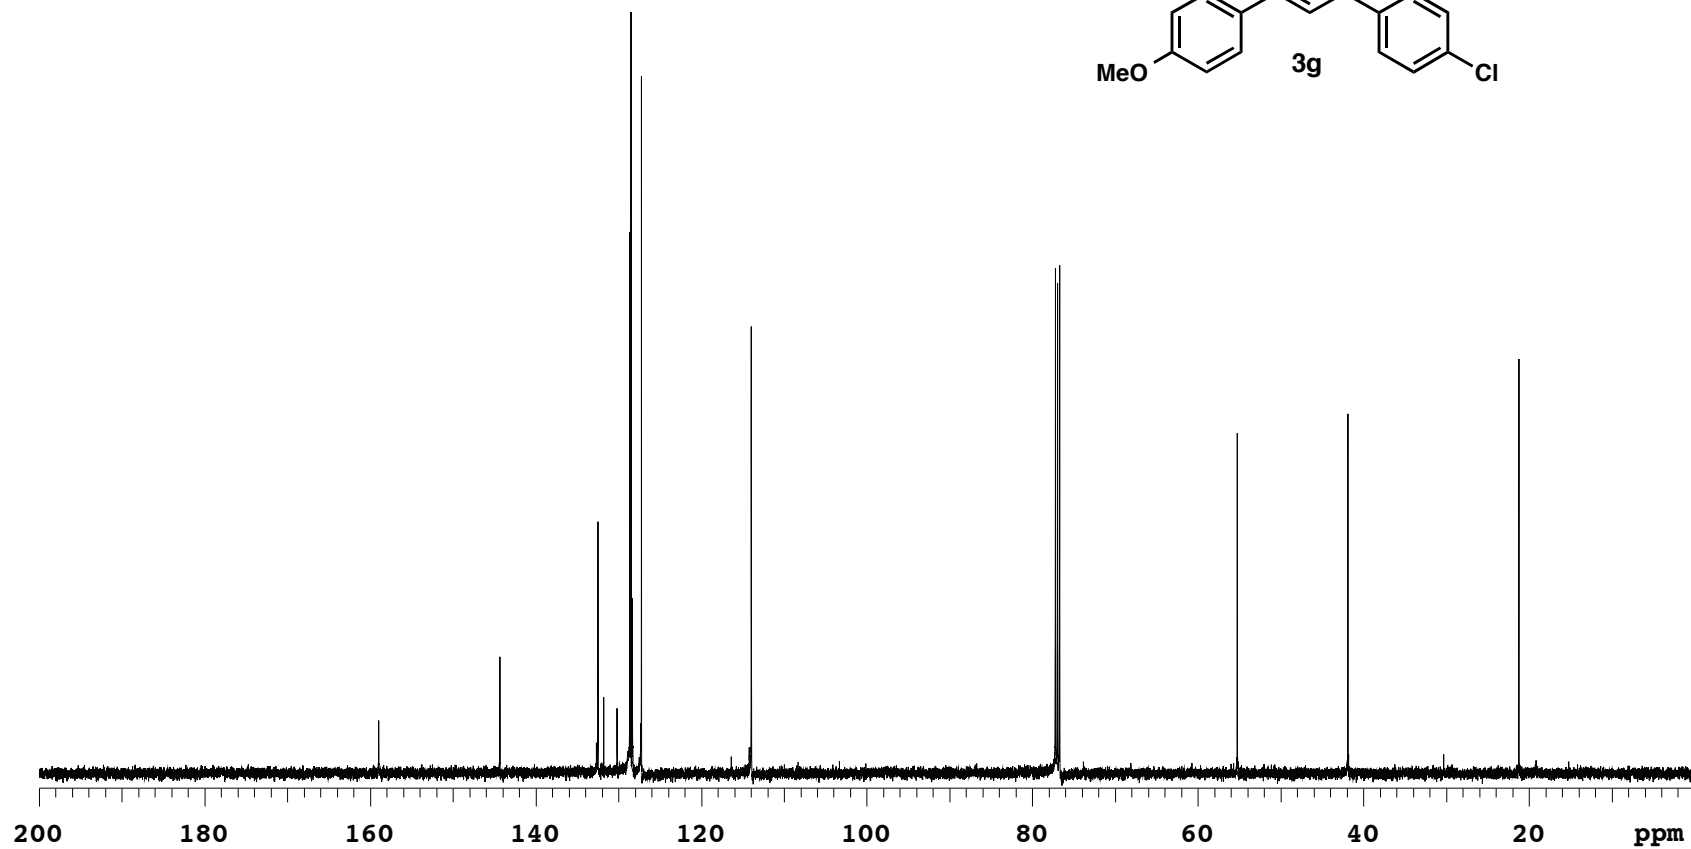



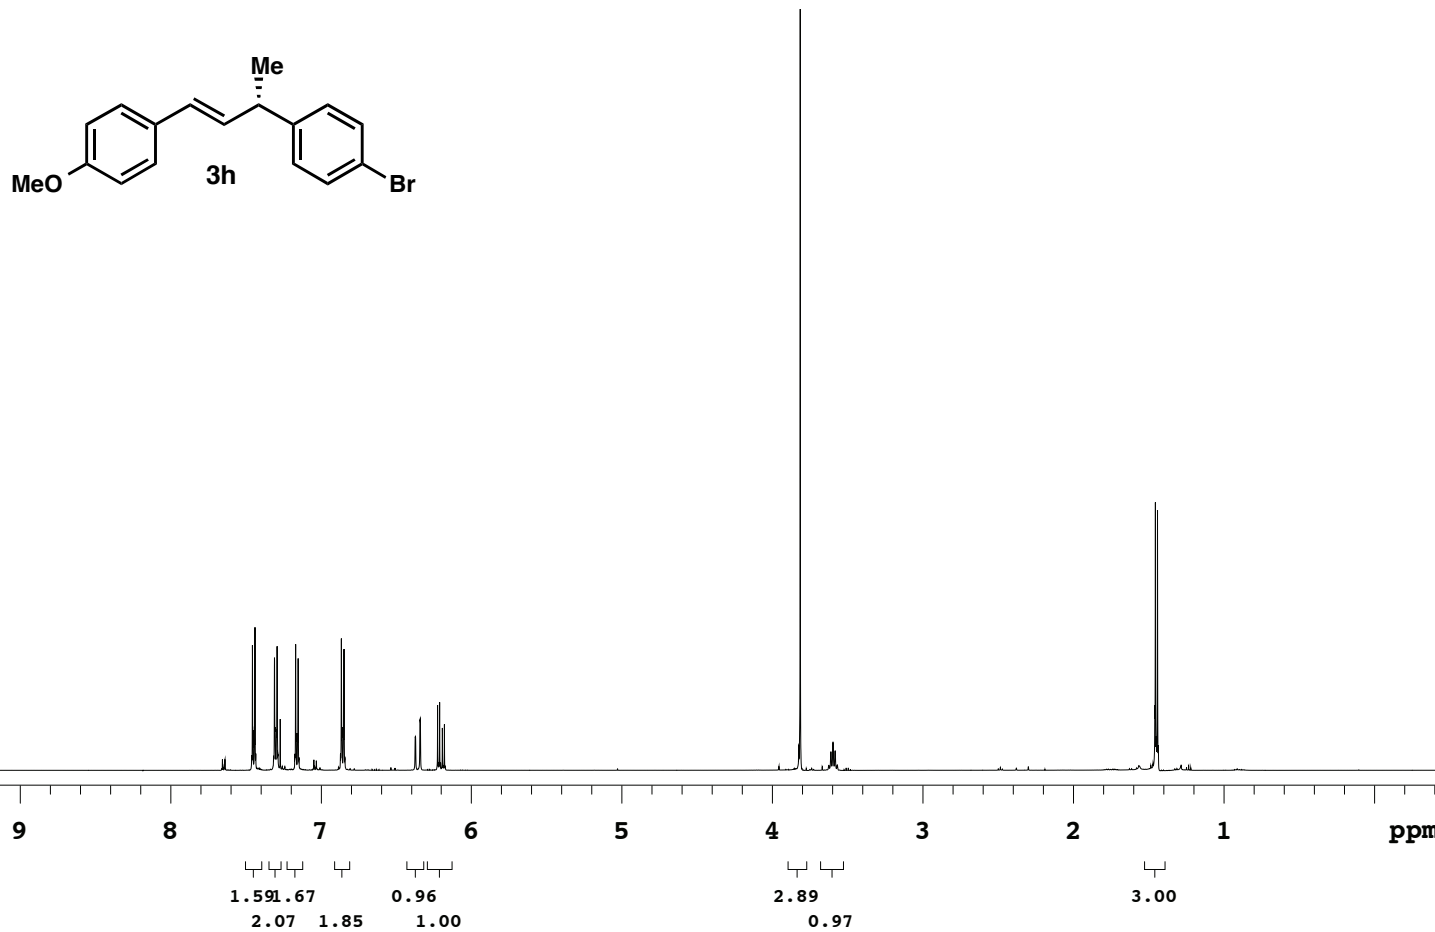

ahc-7-189-4

Sample Name **ahc-7-189-4**  
Date collected **2014-05-14**

Pulse sequence **CARBON**  
Solvent **cdcl3**

Temperature **25**  
Spectrometer **-vnmrs400**

Study owner **acherney**  
Operator **autouser**

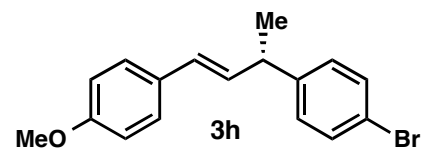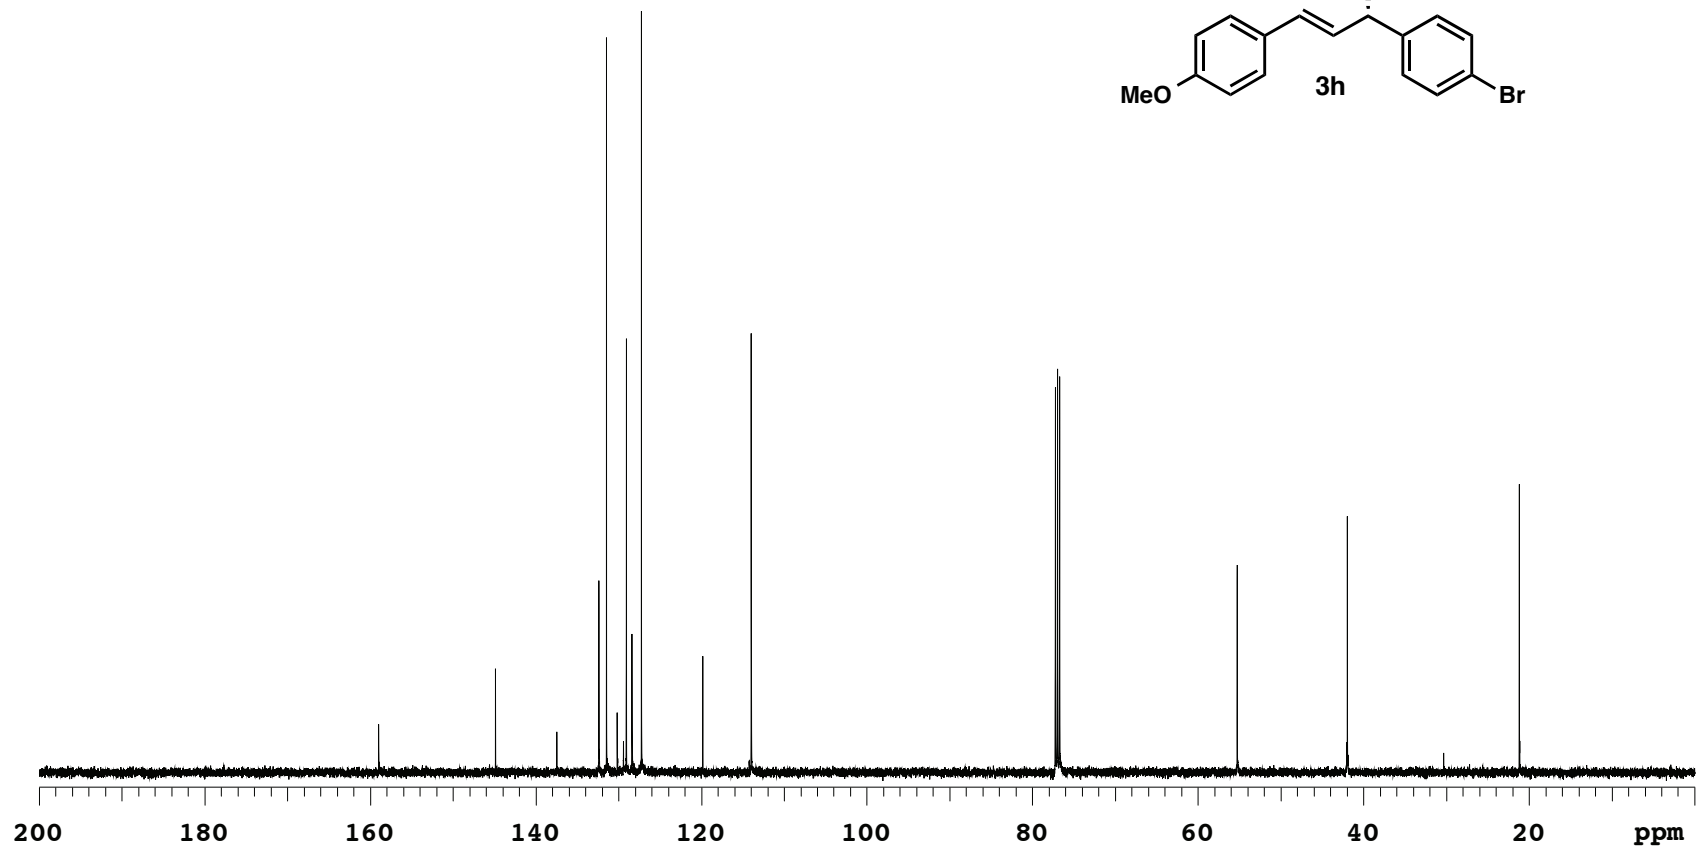

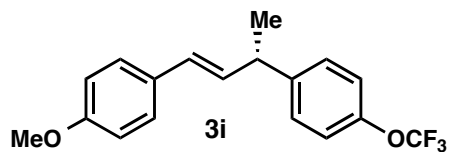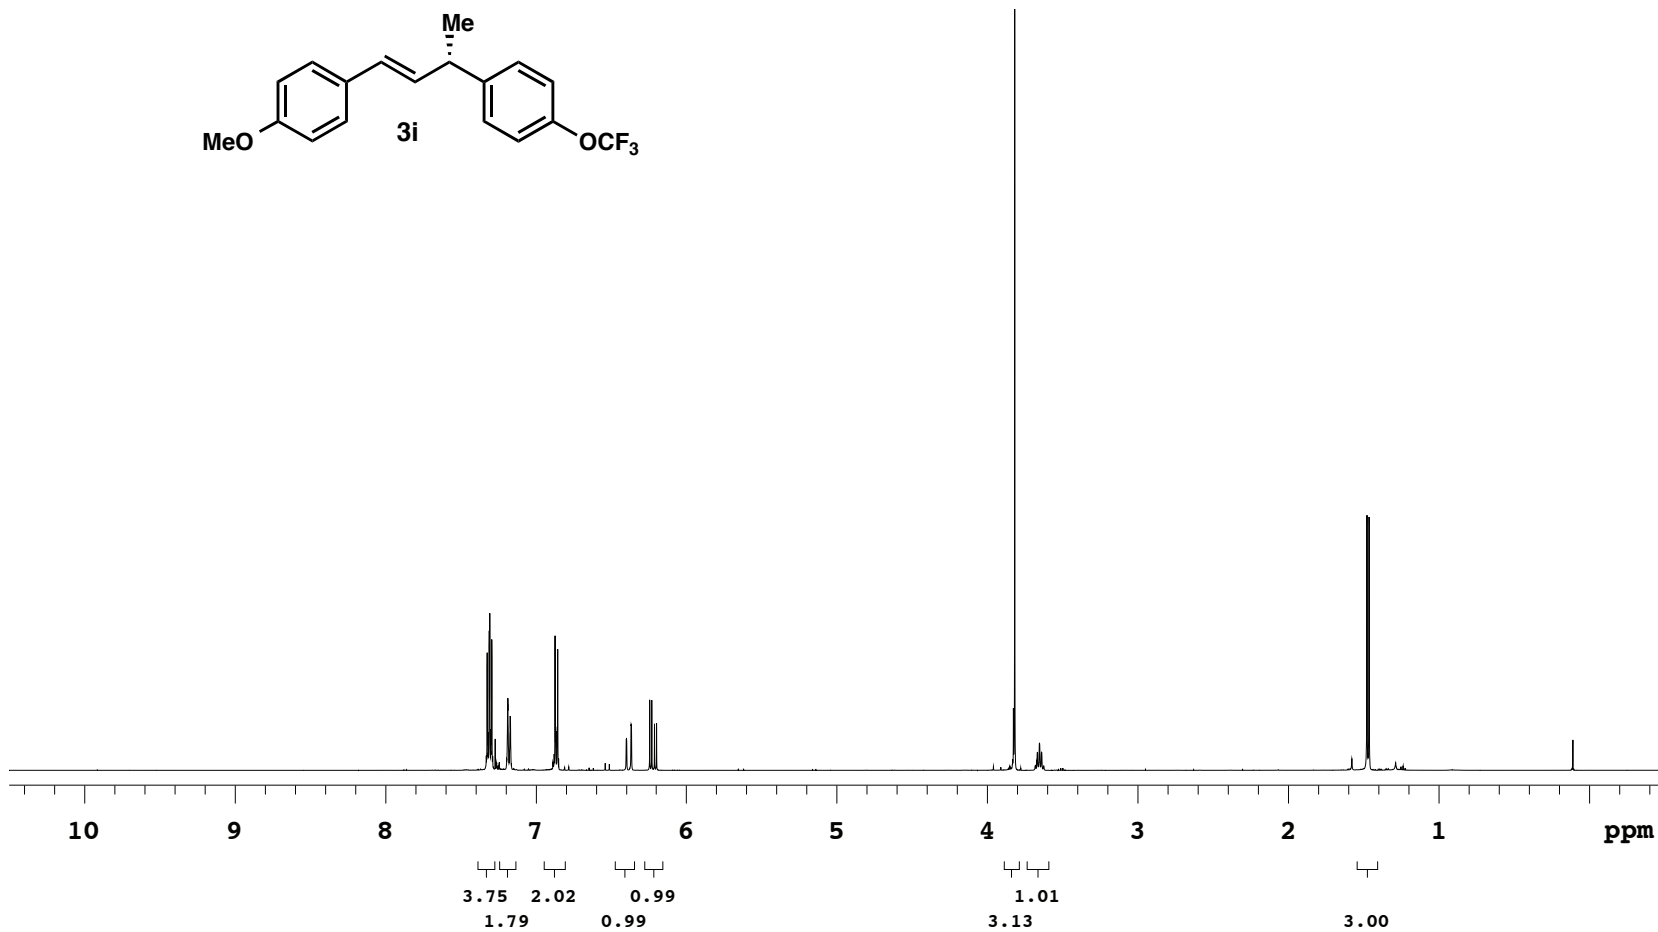

ahc-7-185-13

Sample Name **ahc-7-185-13**  
Date collected **2014-05-08**

Pulse sequence **CARBON**  
Solvent **cdcl3**

Temperature **25**  
Spectrometer **-vnmrs400**

Study owner **acherney**  
Operator **autouser**

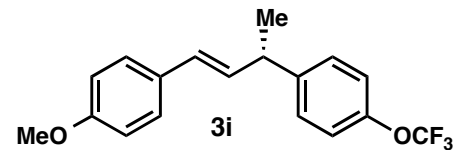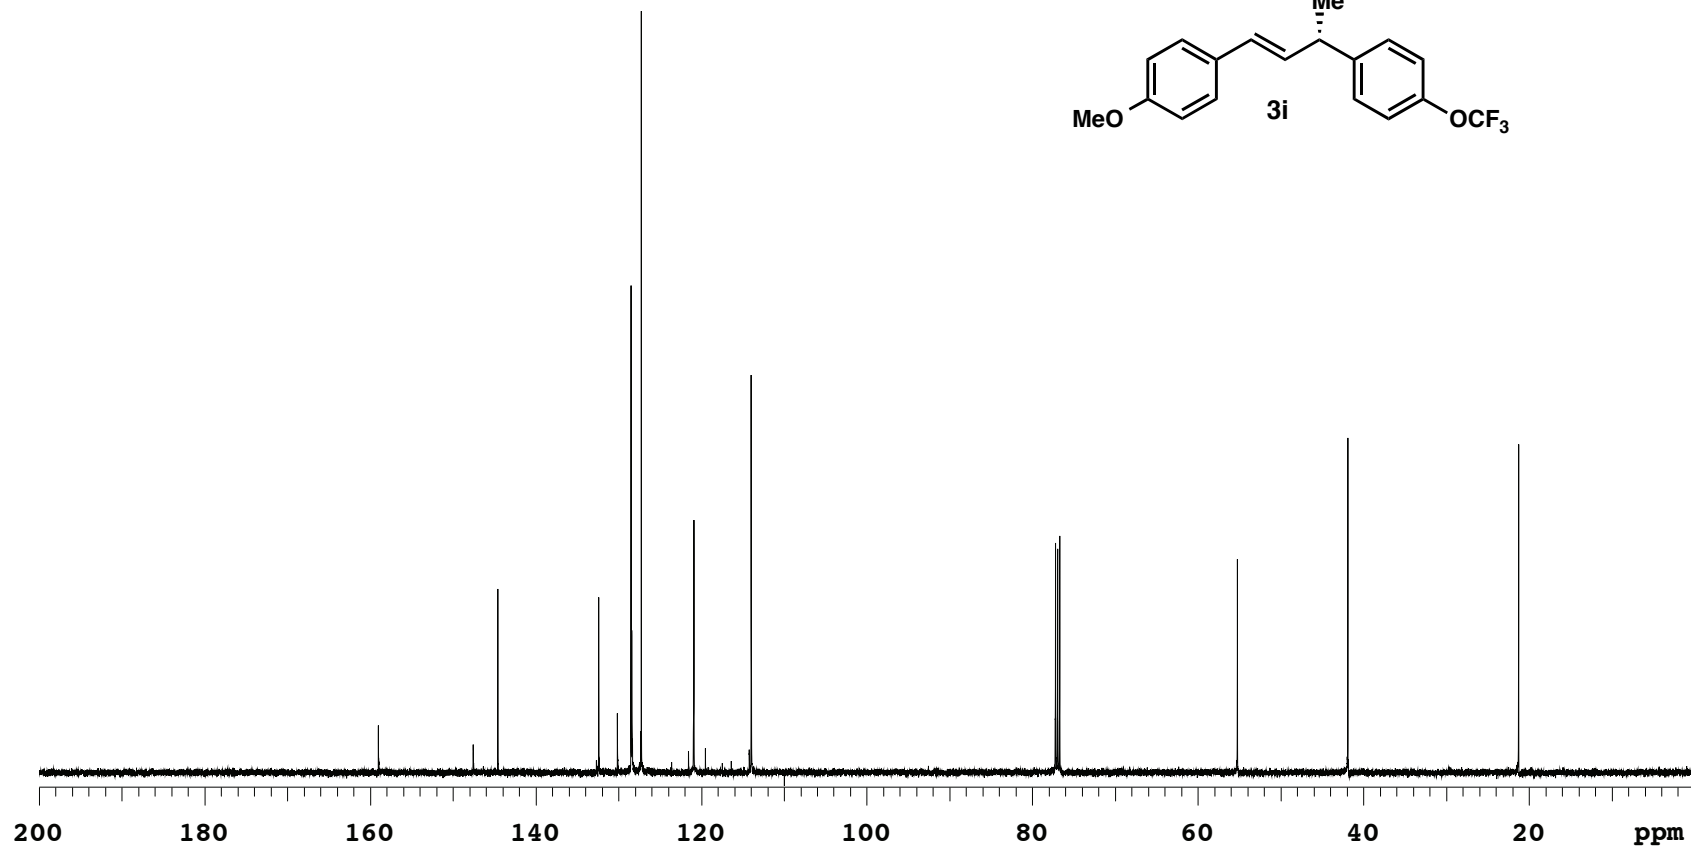

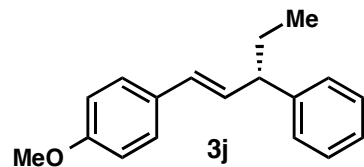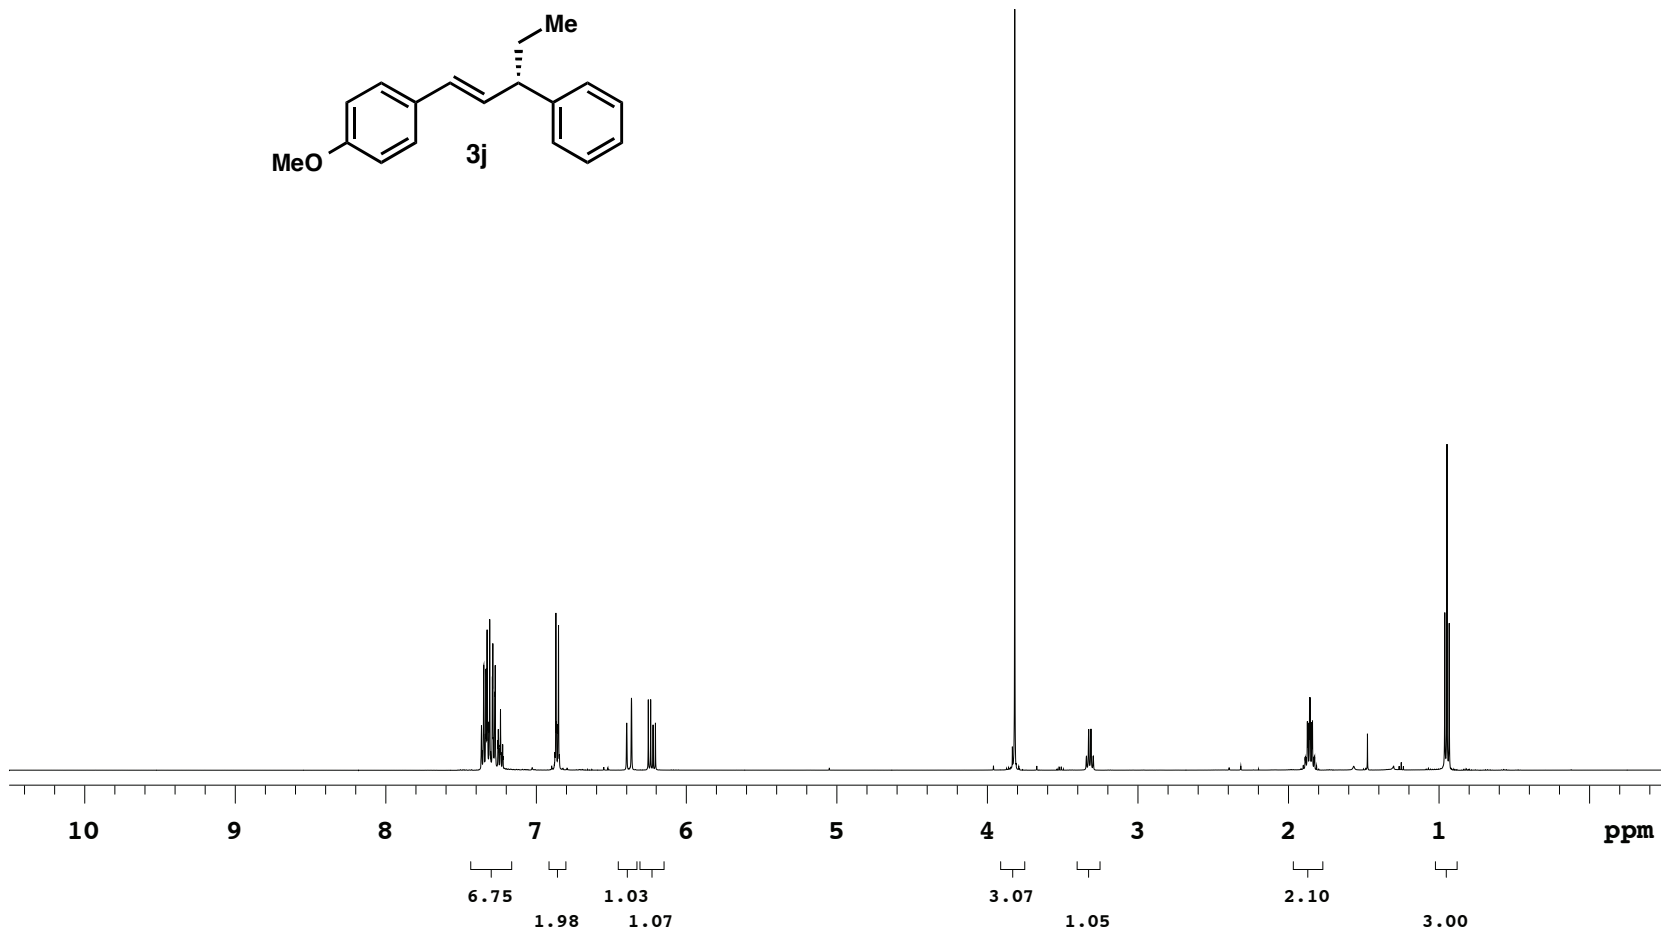

ahc-7-189-3

Sample Name **ahc-7-189-3**  
Date collected **2014-05-14**

Pulse sequence **CARBON**  
Solvent **cdcl3**

Temperature **25**  
Spectrometer **-vnmrs400**

Study owner **acherney**  
Operator **autouser**

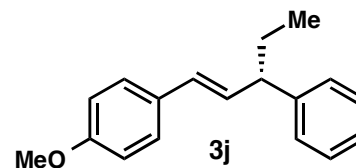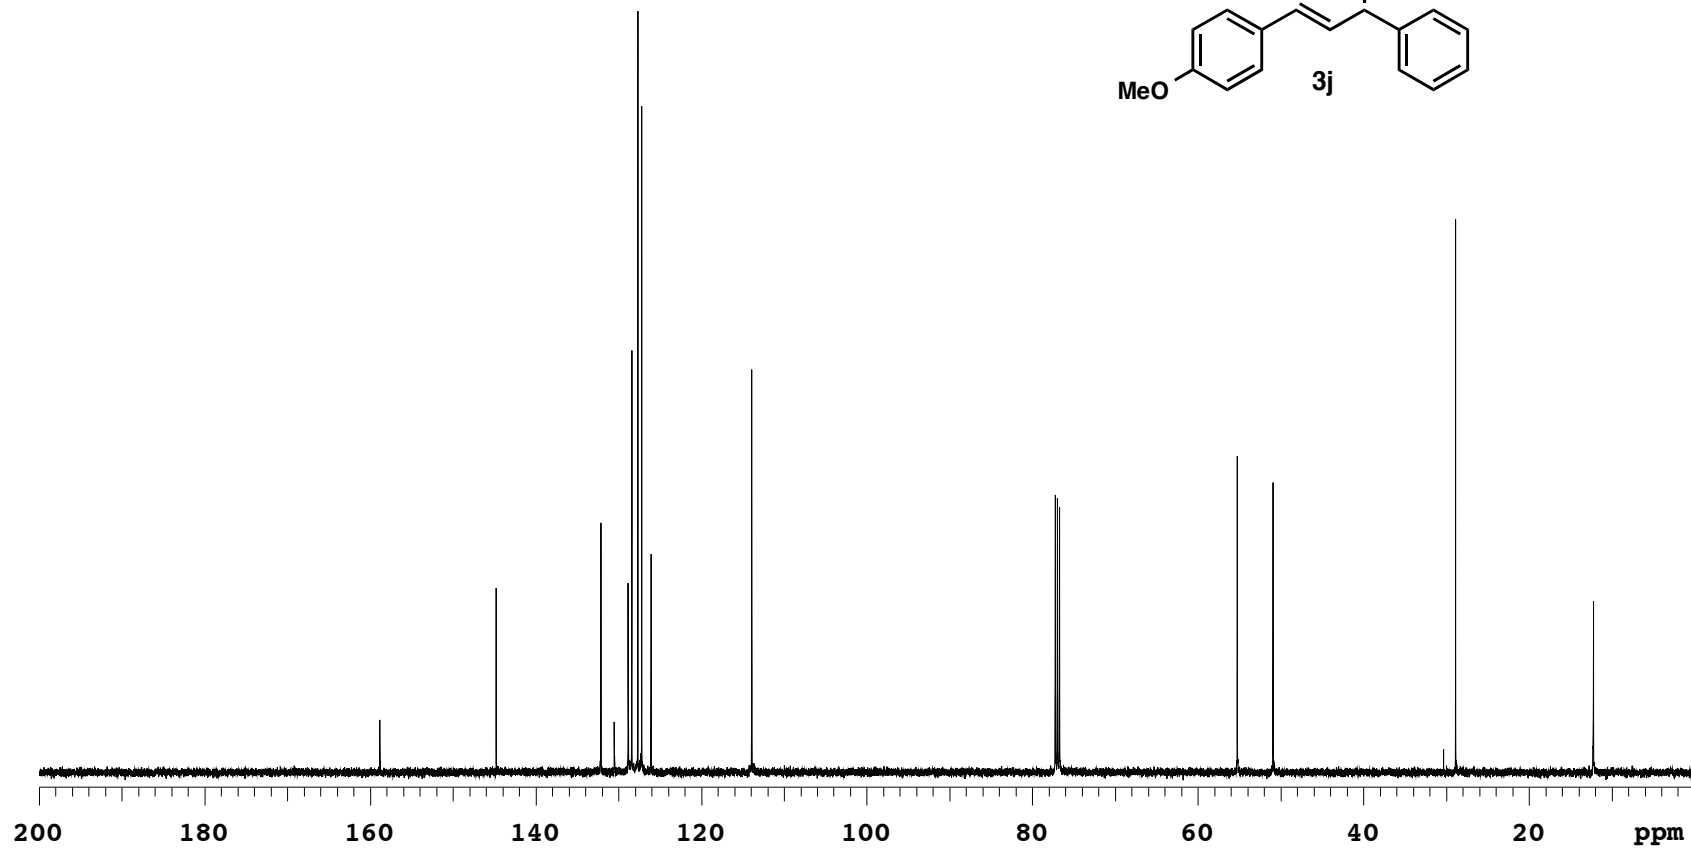

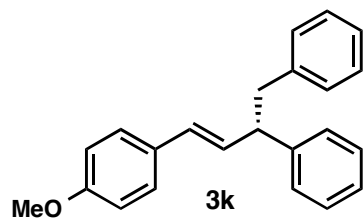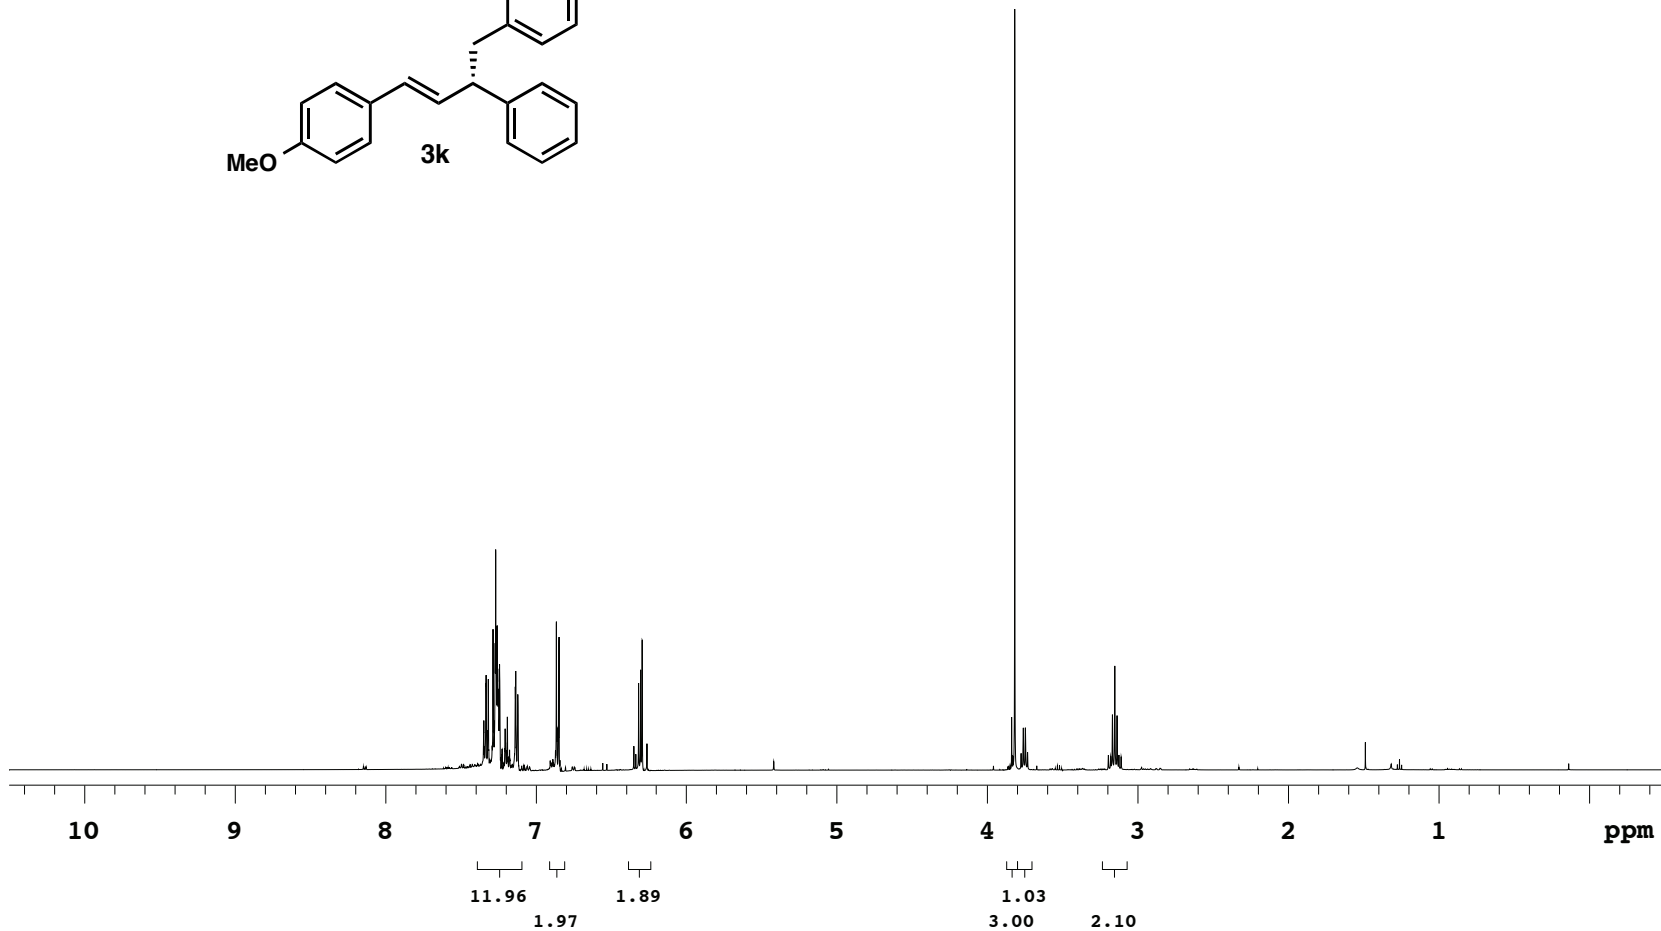

ahc-7-185-10

Sample Name **ahc-7-185-10**  
Date collected **2014-05-05**

Pulse sequence **CARBON**  
Solvent **cdcl3**

Temperature **25**  
Spectrometer **-vnmrs400**

Study owner **acherney**  
Operator **autouser**

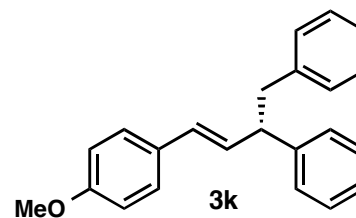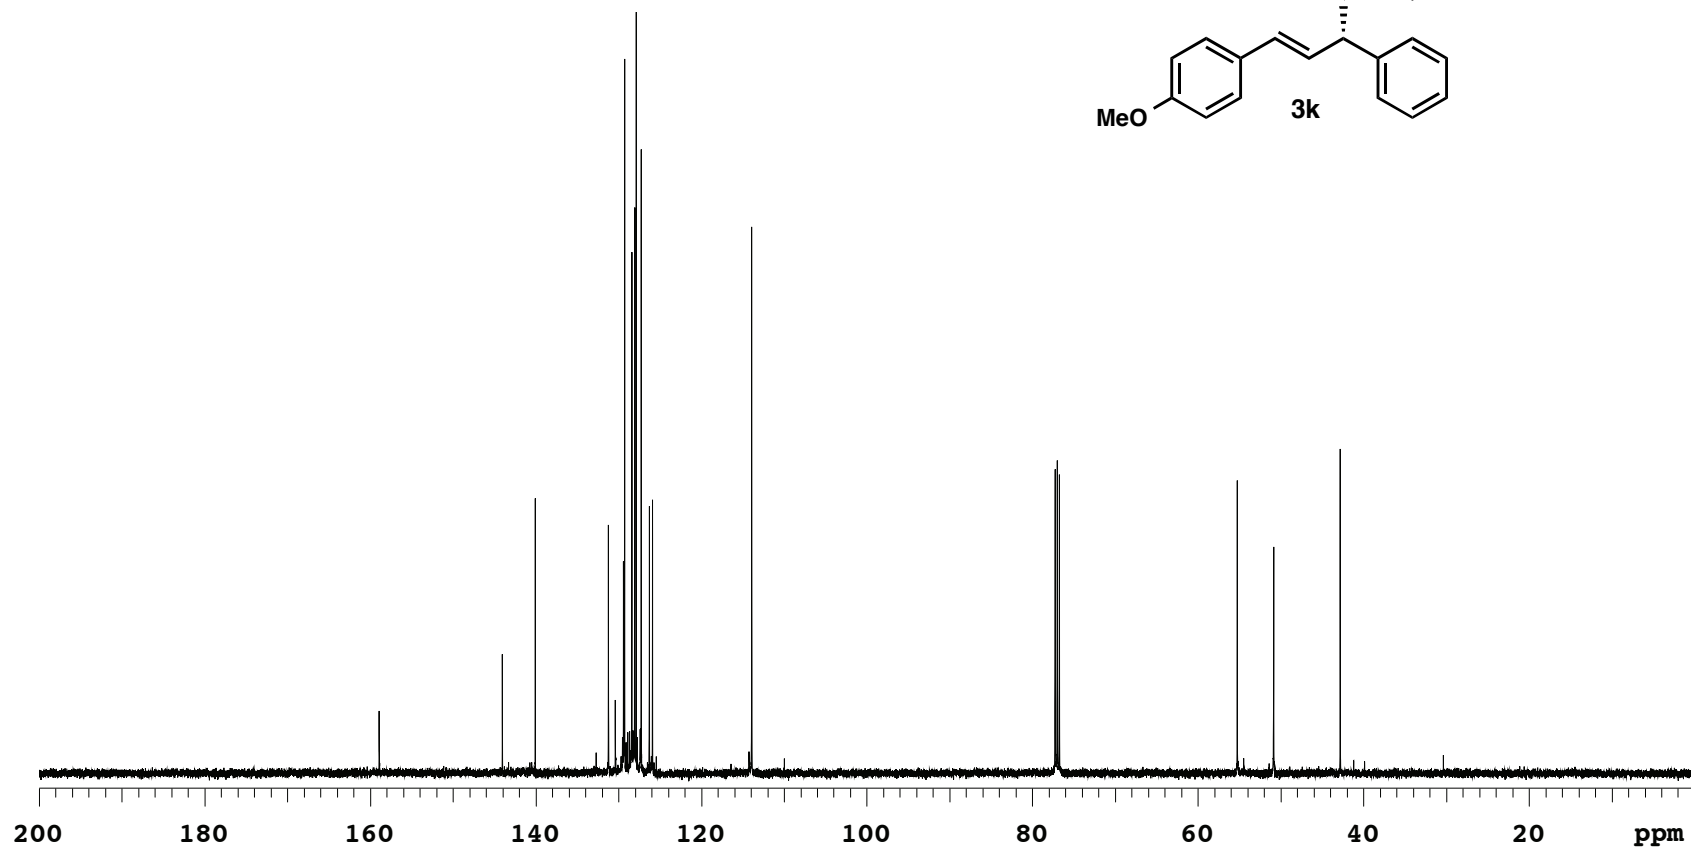



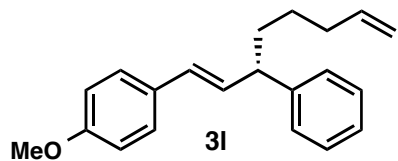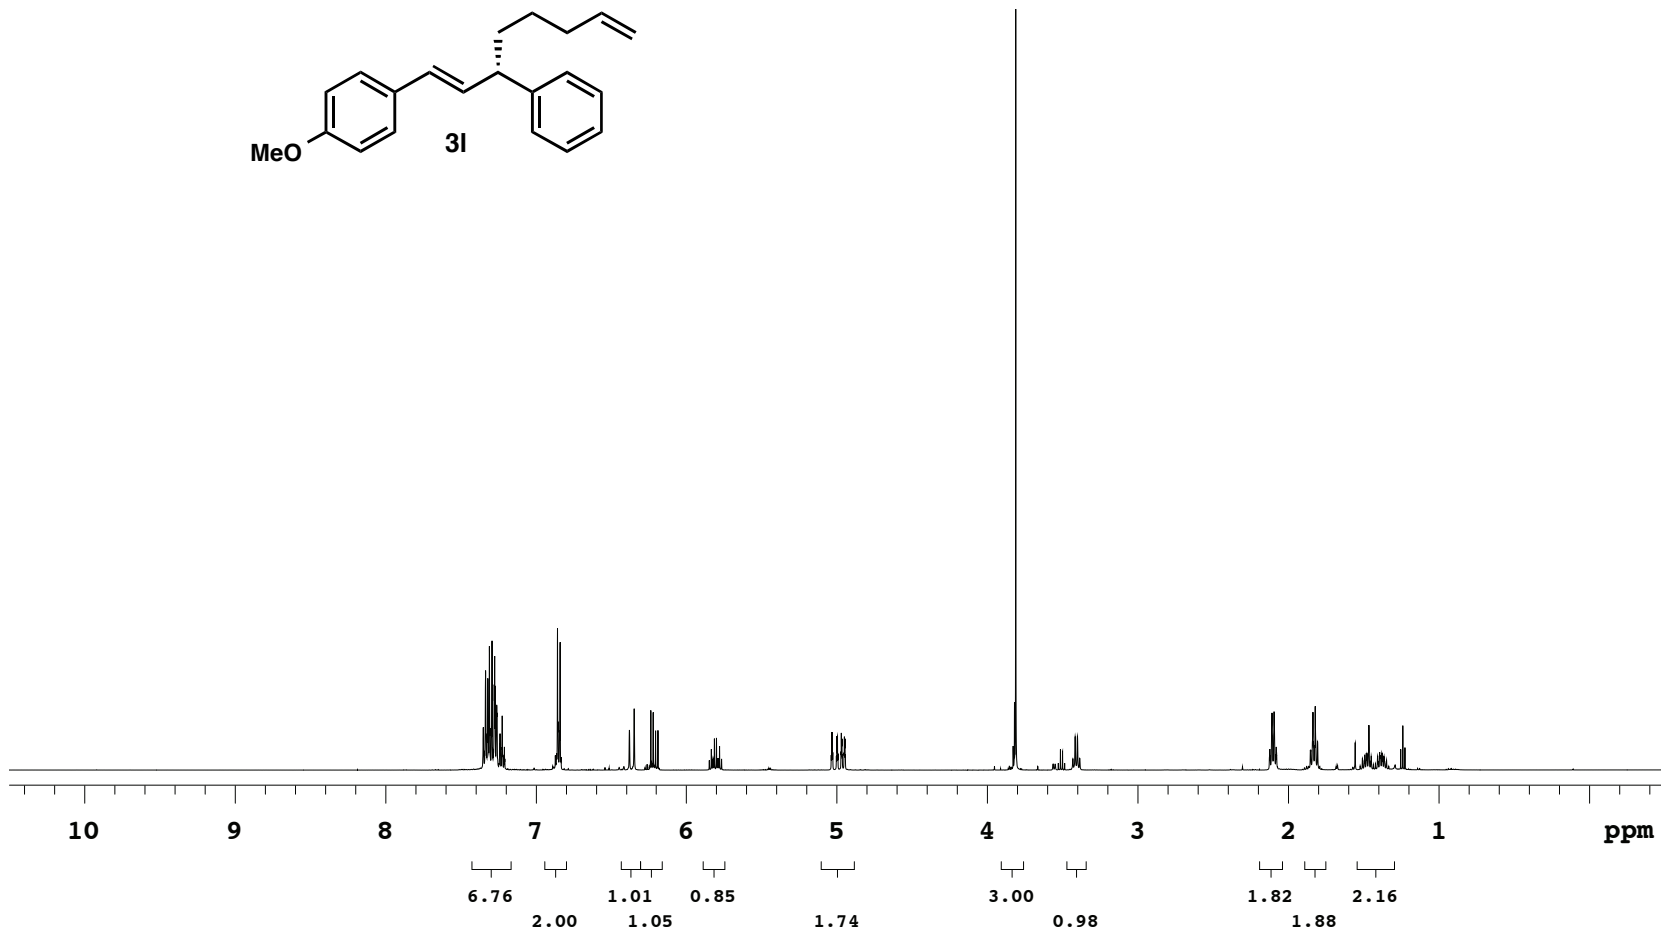

ahc-7-185-15

Sample Name **ahc-7-185-15**  
Date collected **2014-05-08**

Pulse sequence **CARBON**  
Solvent **cdcl3**

Temperature **25**  
Spectrometer **-vnmrs400**

Study owner **acherney**  
Operator **autouser**

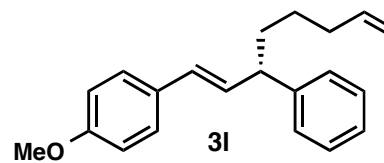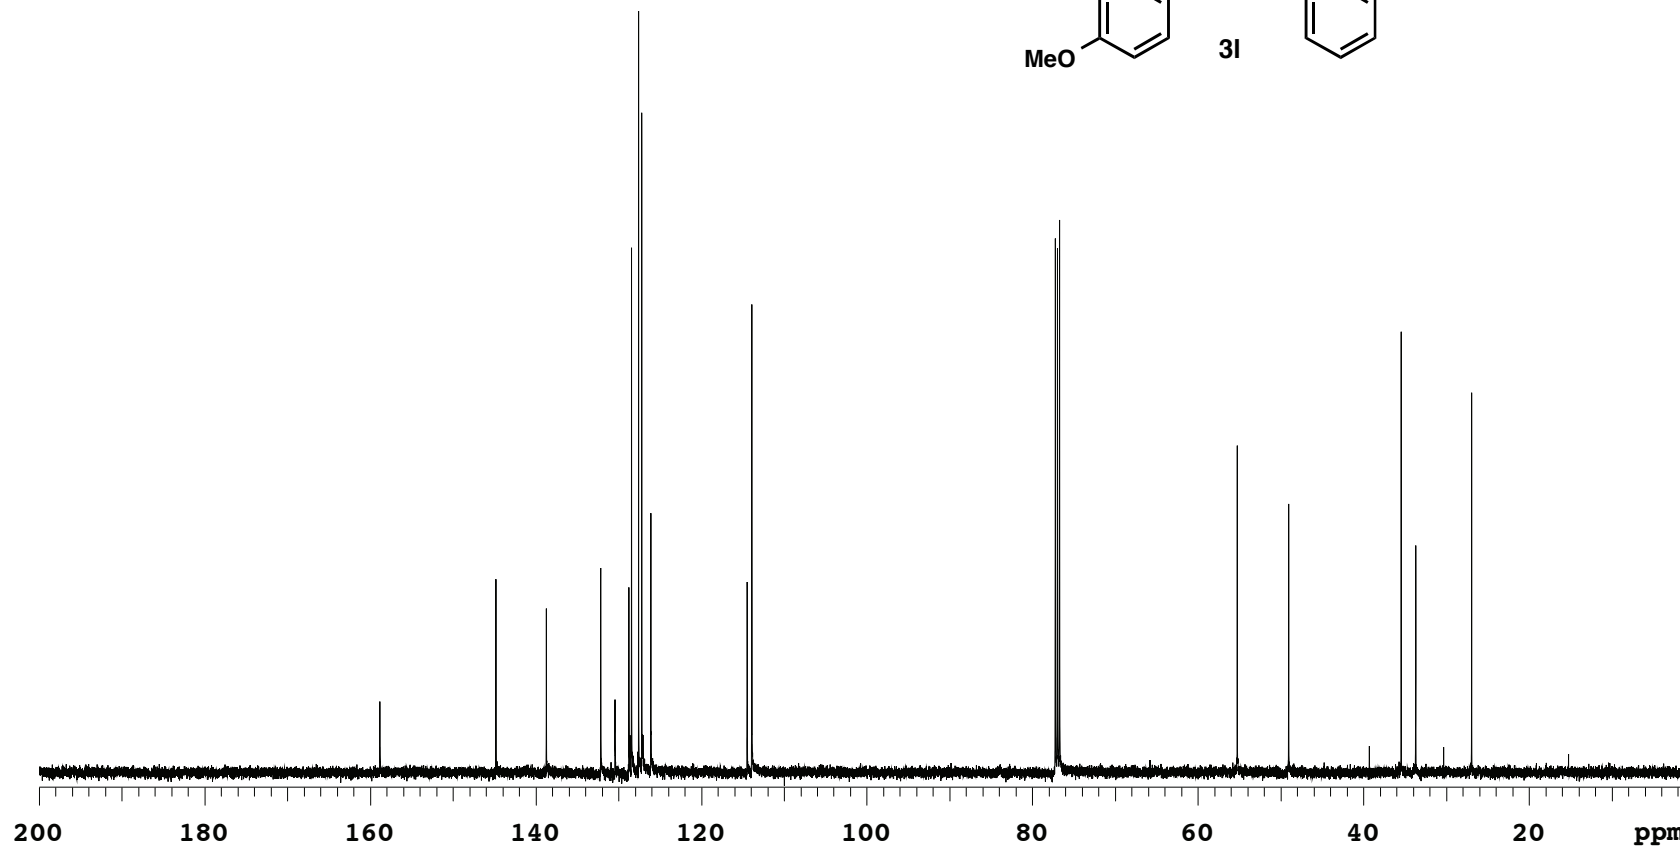

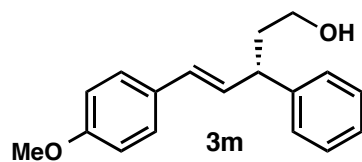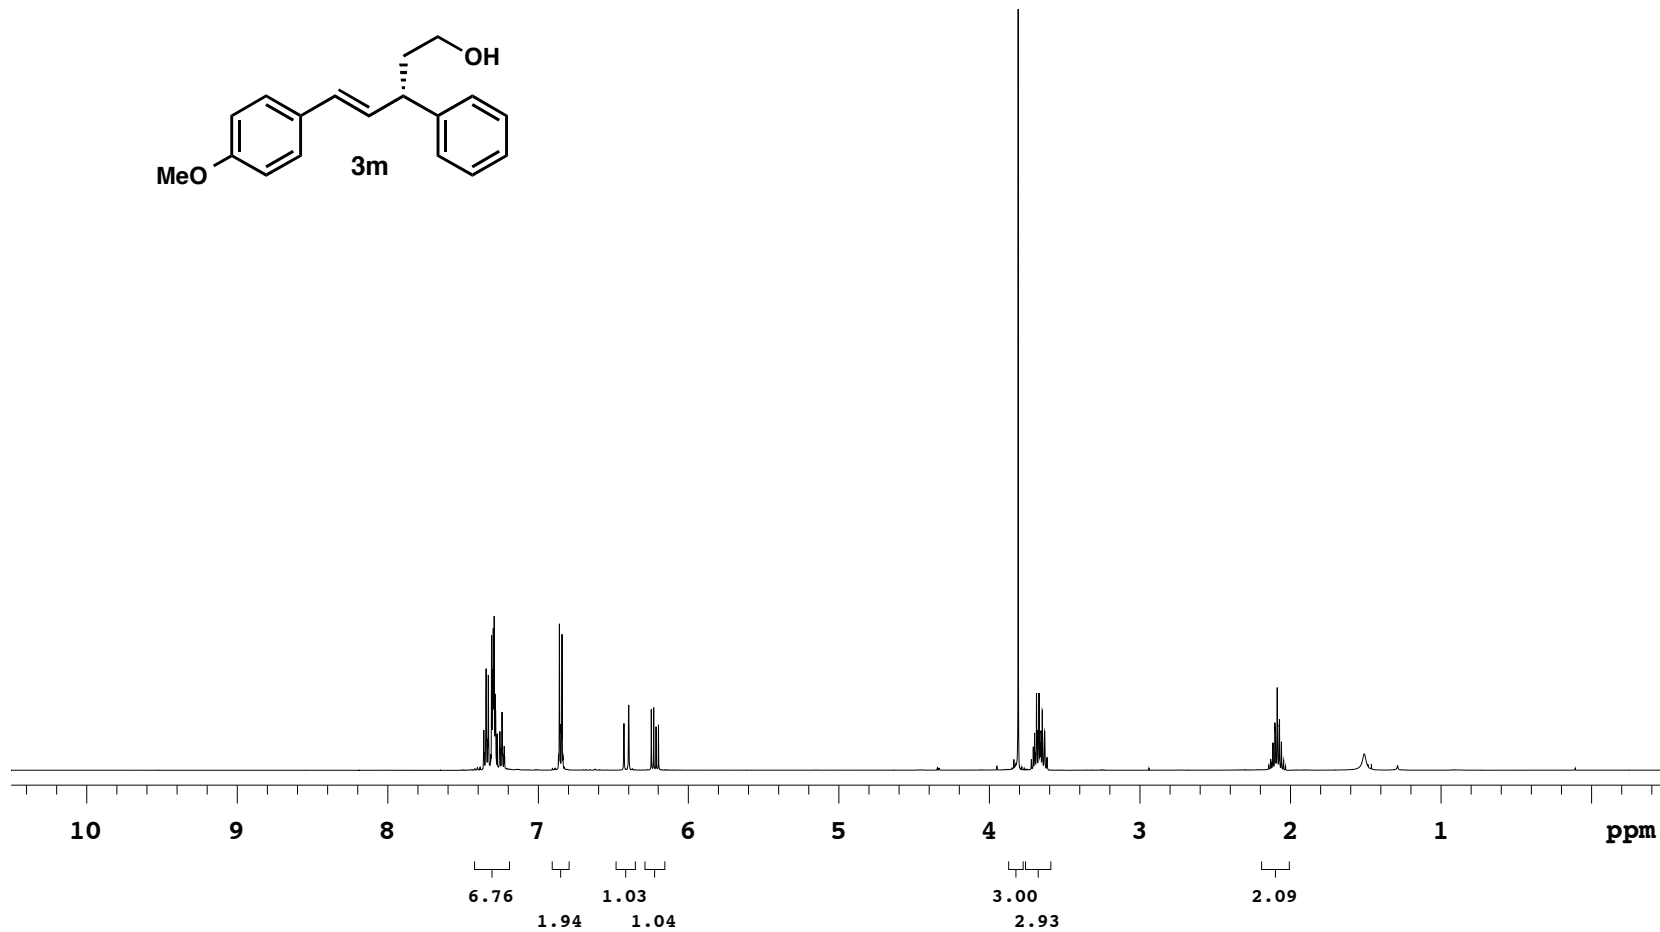

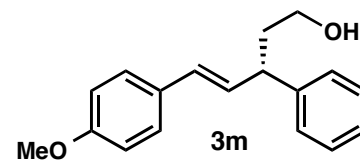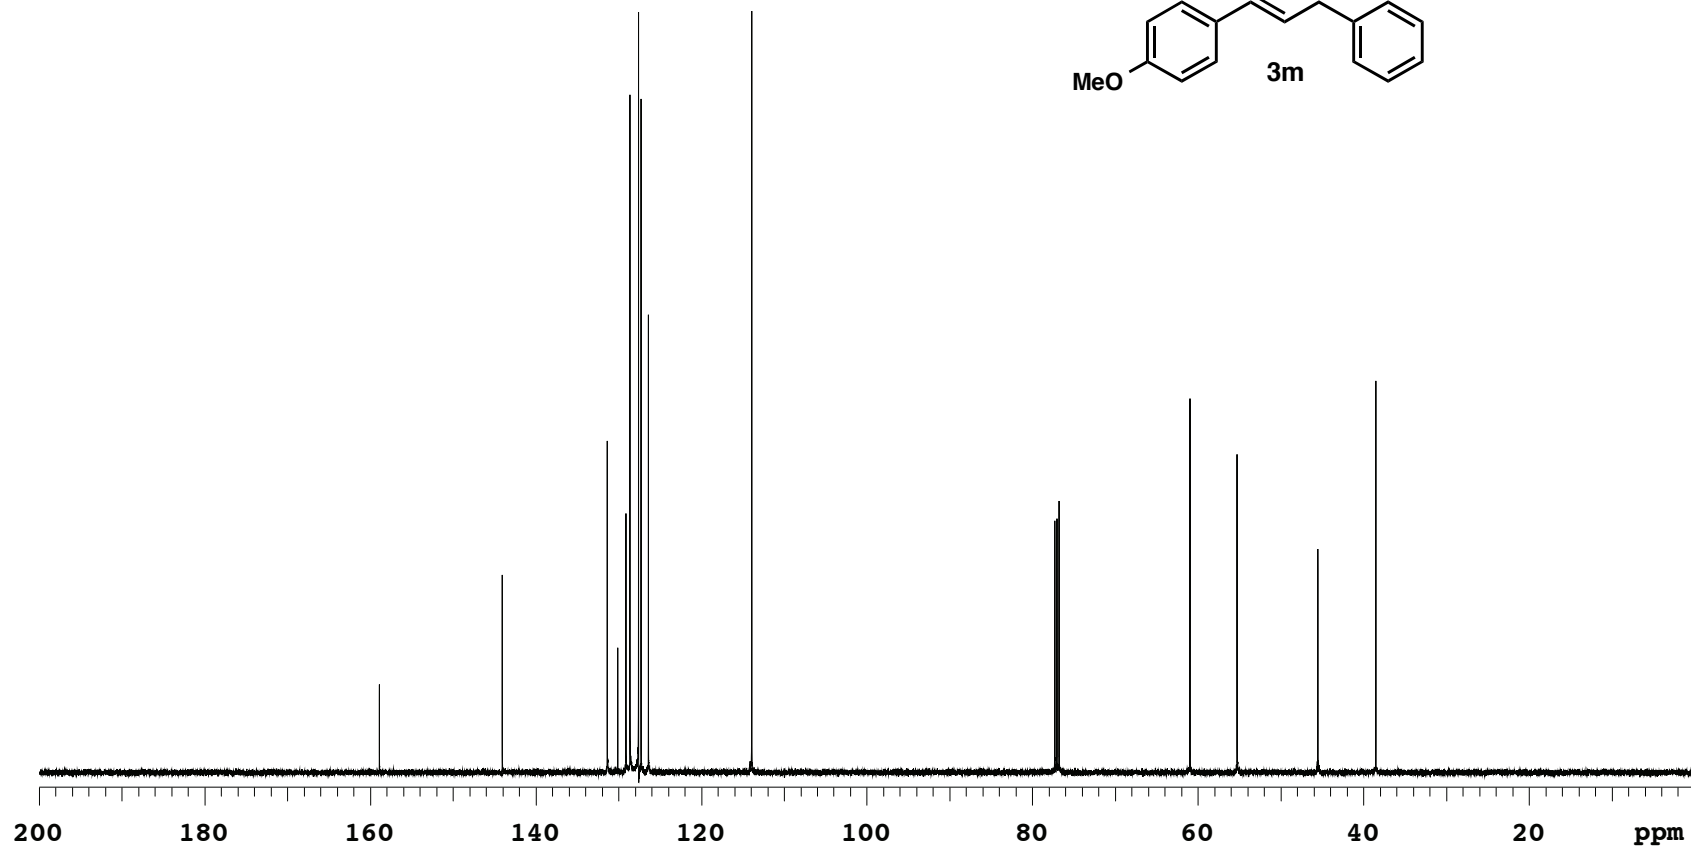

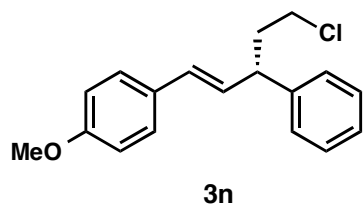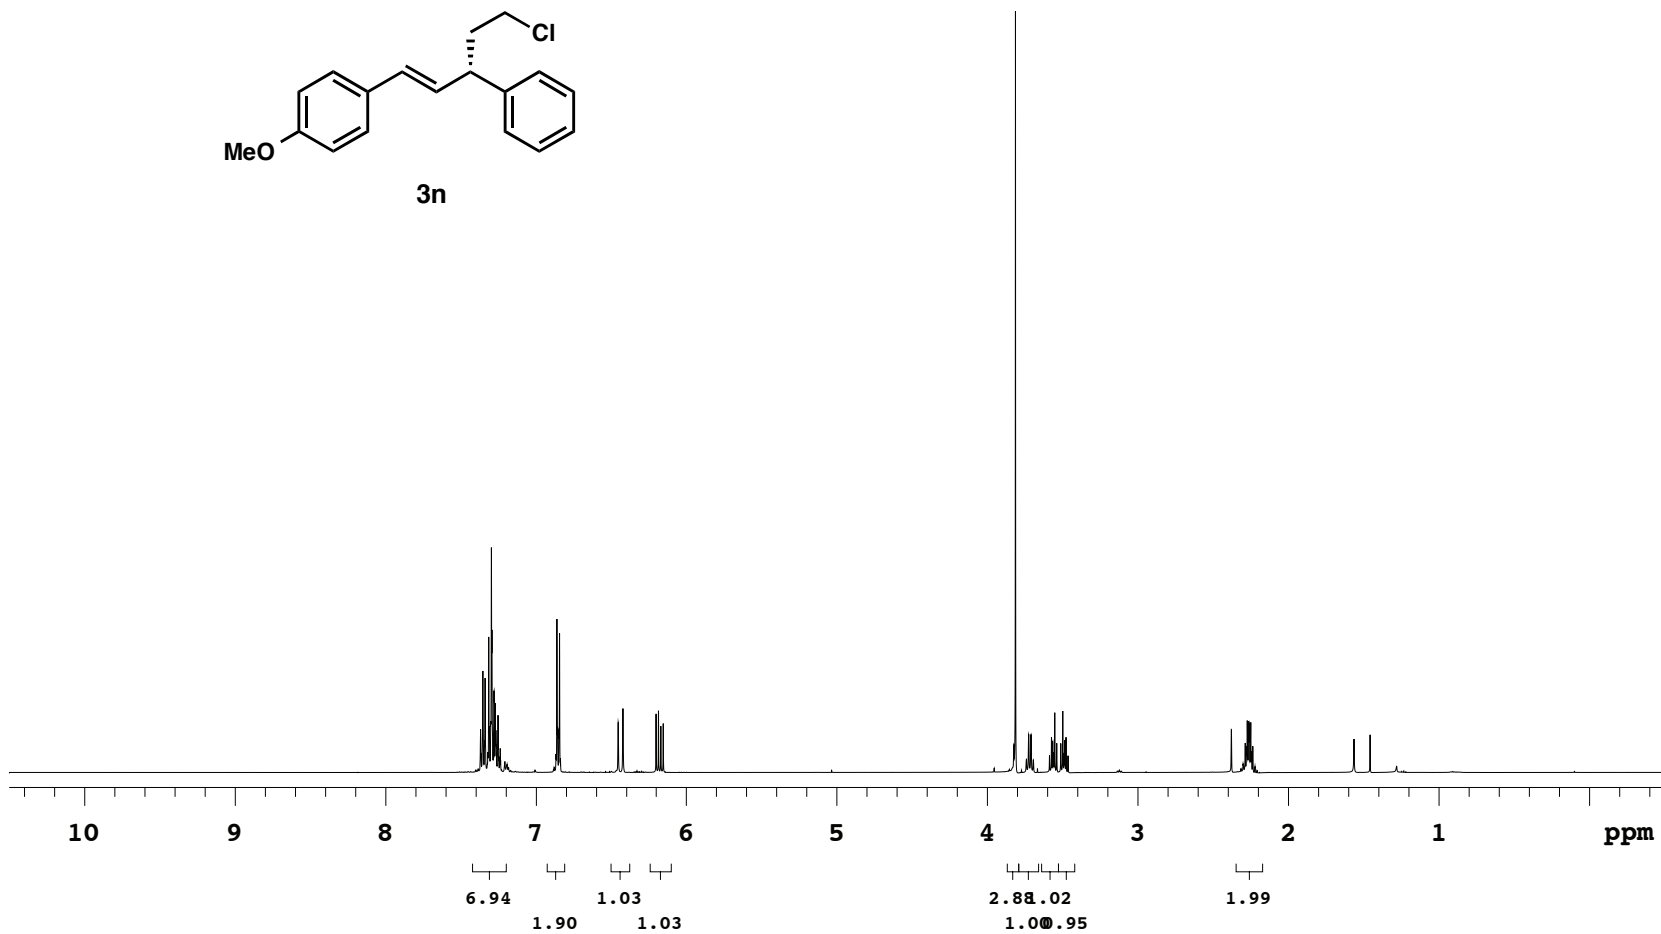

ahc-7-271-4

Sample Name **ahc-7-271-4**  
Date collected **2014-09-10**

Pulse sequence **CARBON**  
Solvent **cdcl3**

Temperature **25**  
Spectrometer **-vnmrs400**

Study owner **acherney**  
Operator **autouser**

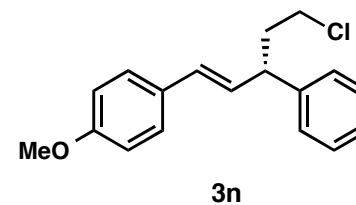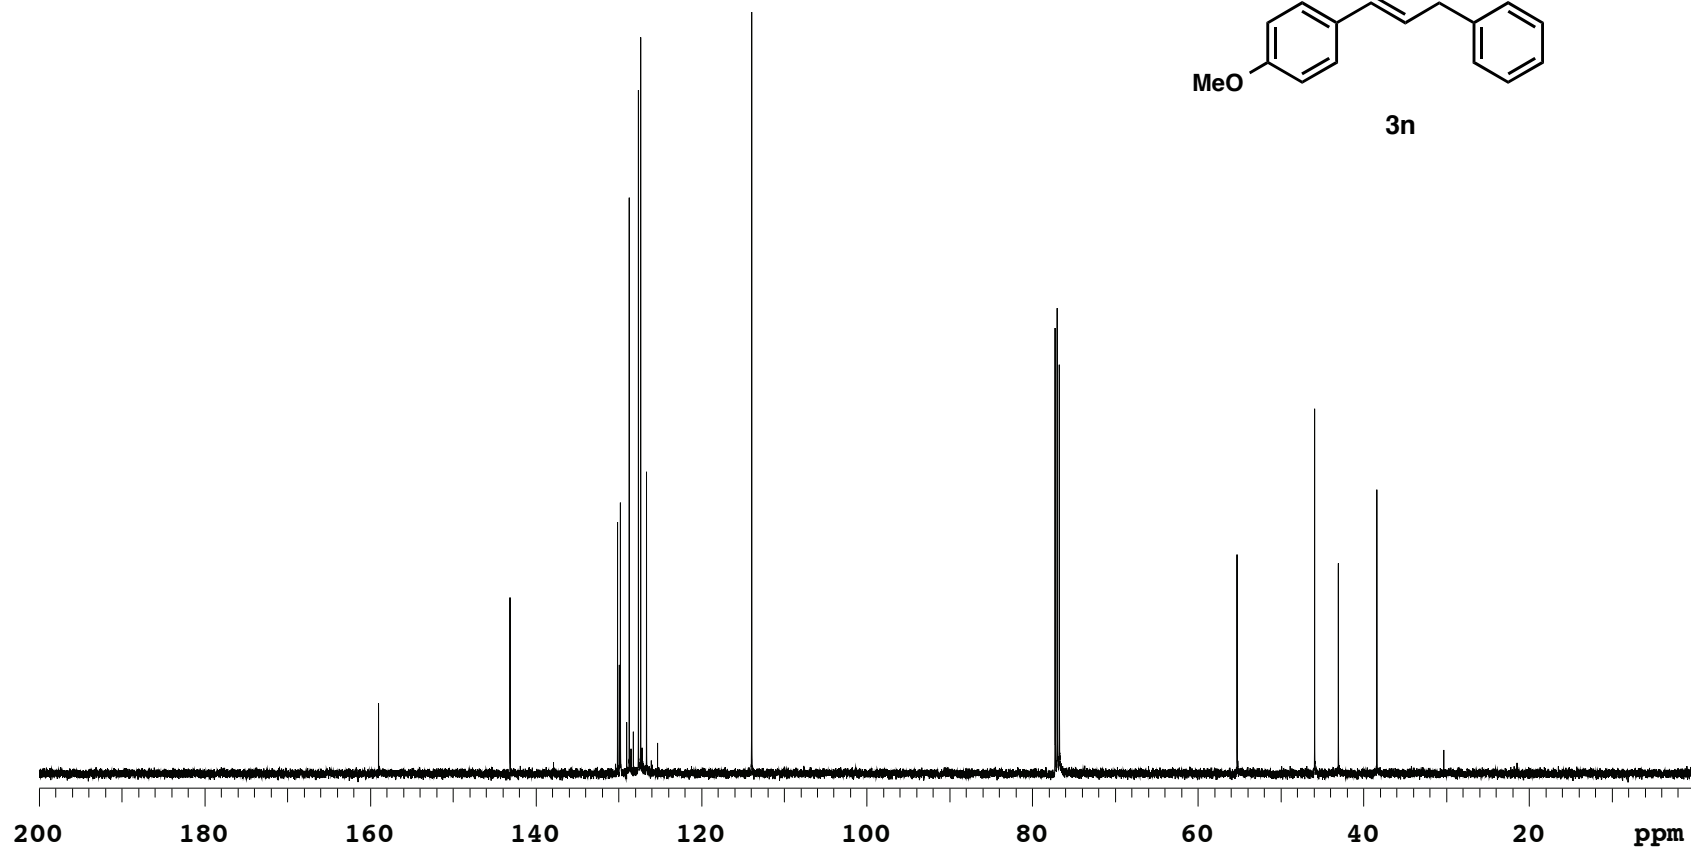

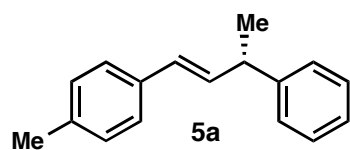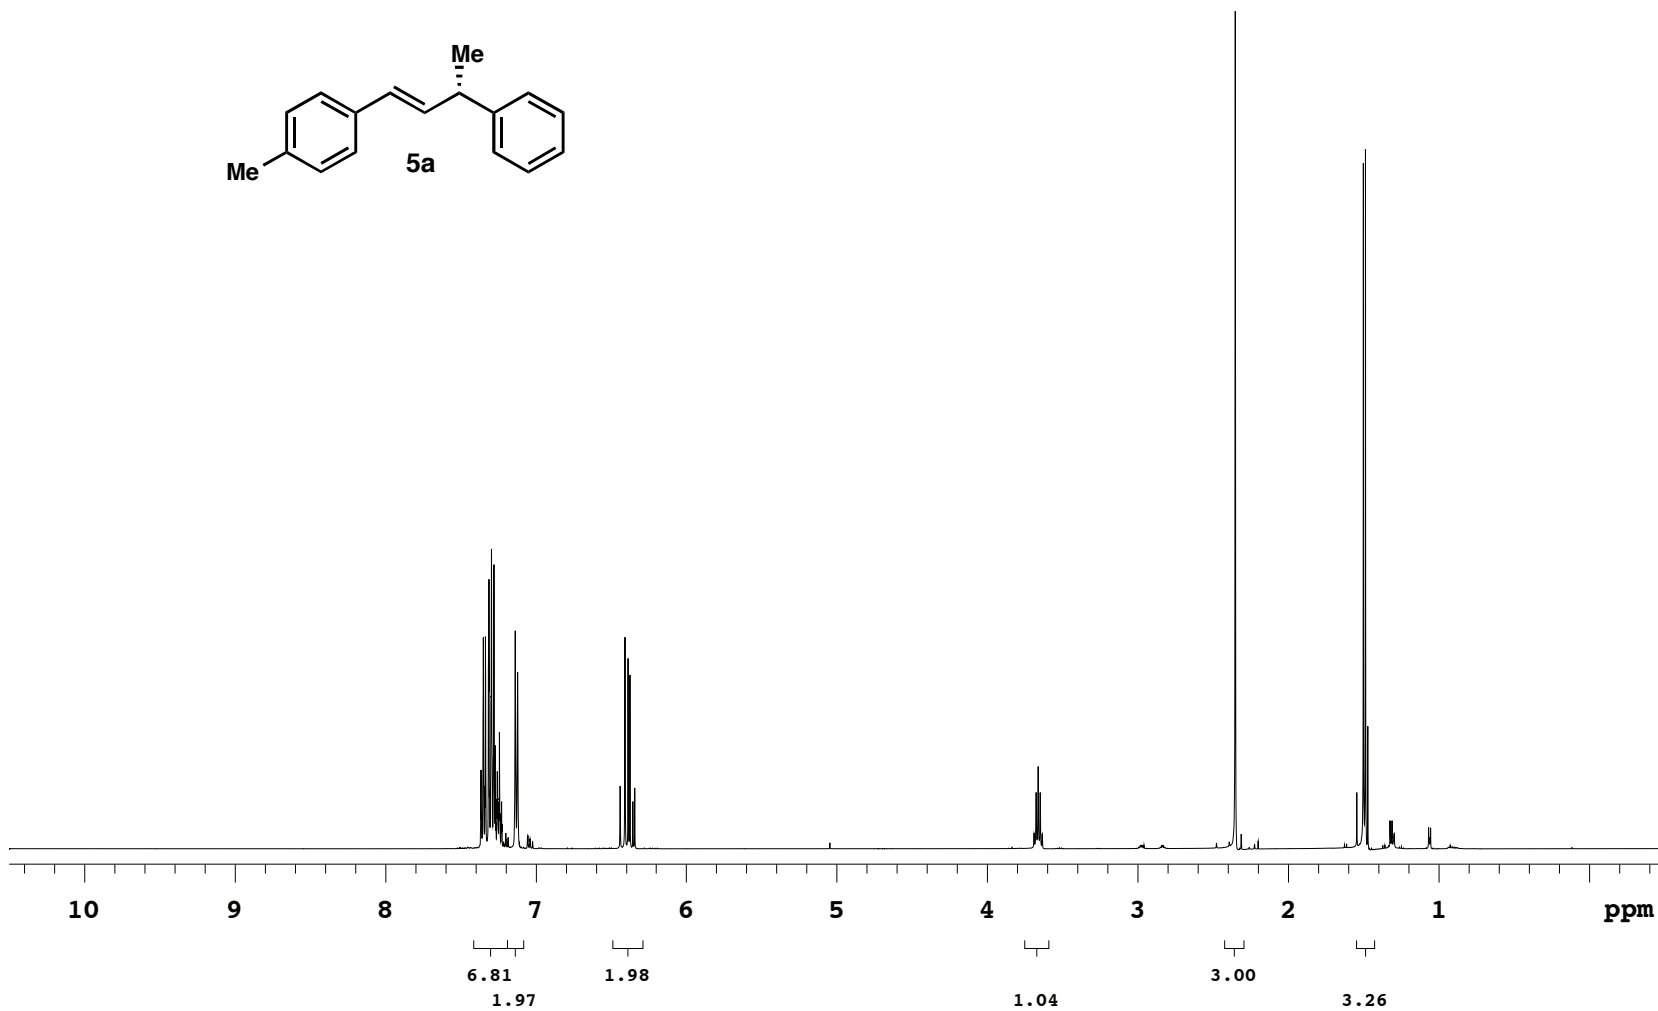

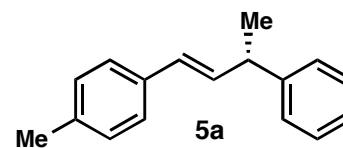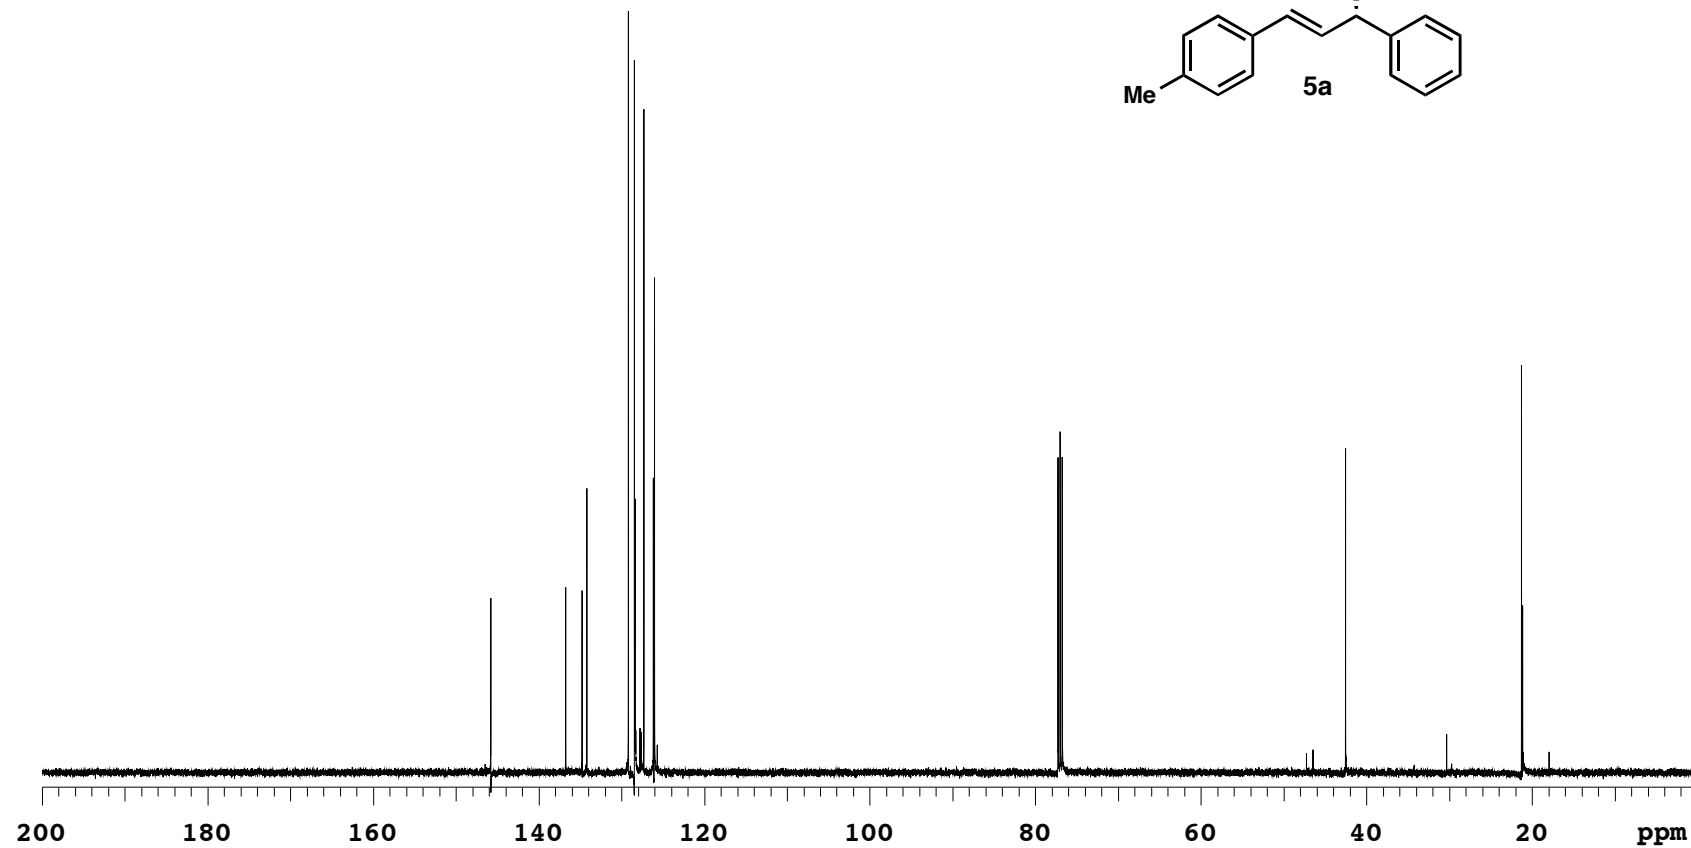



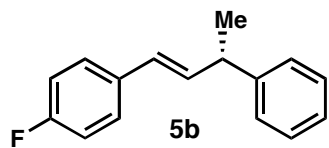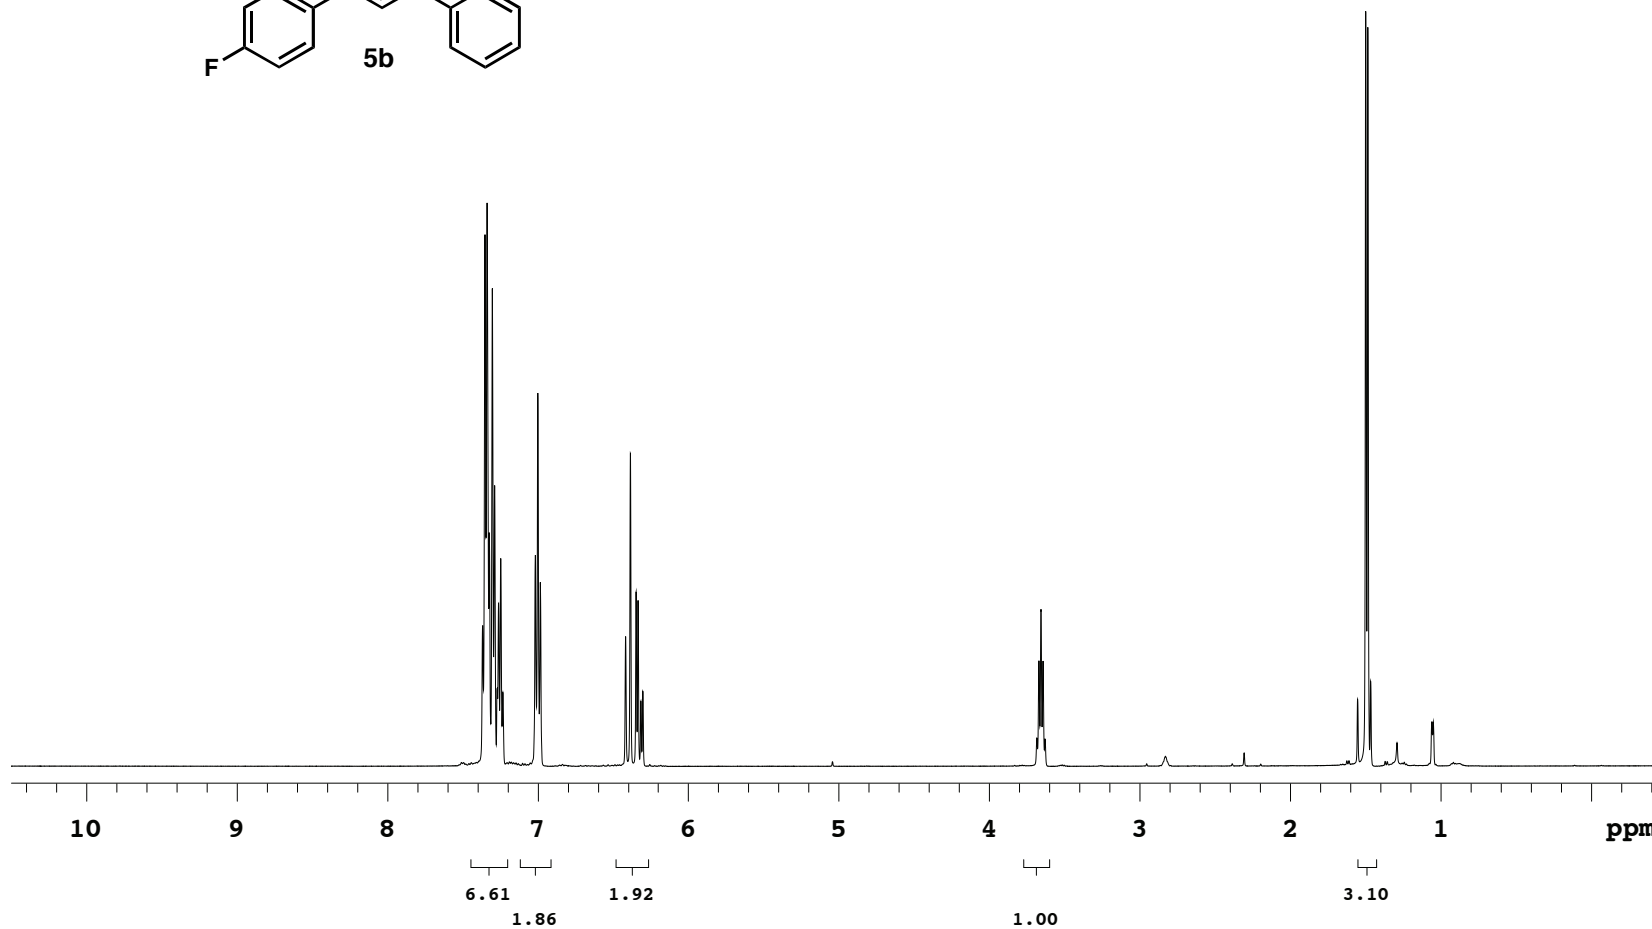

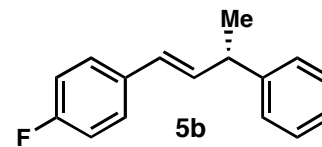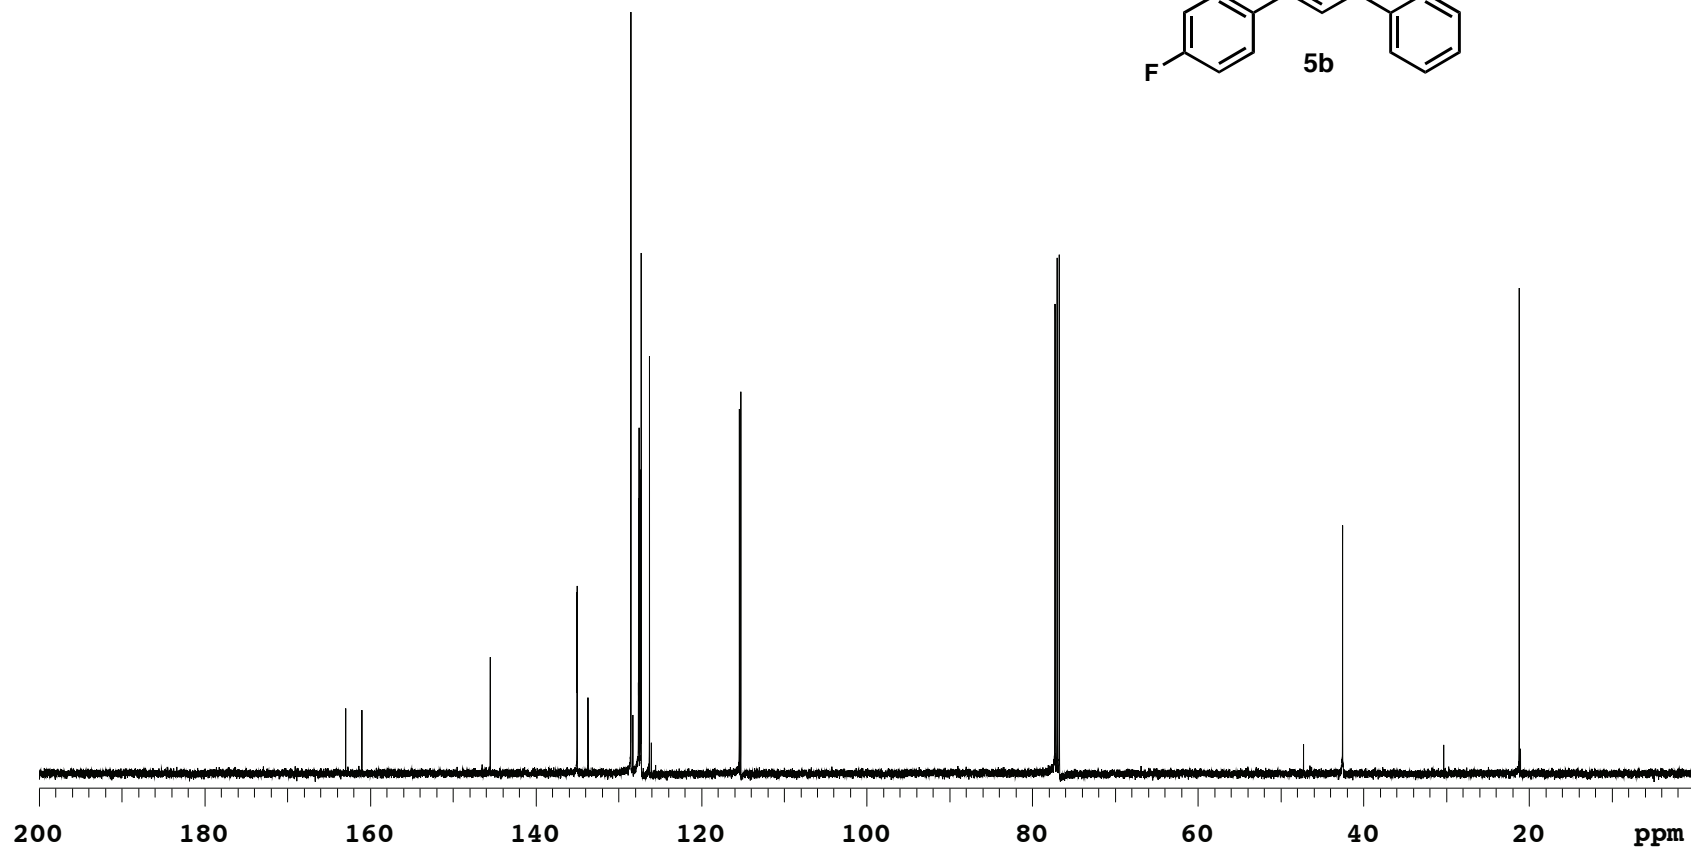

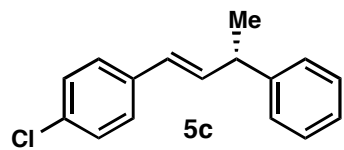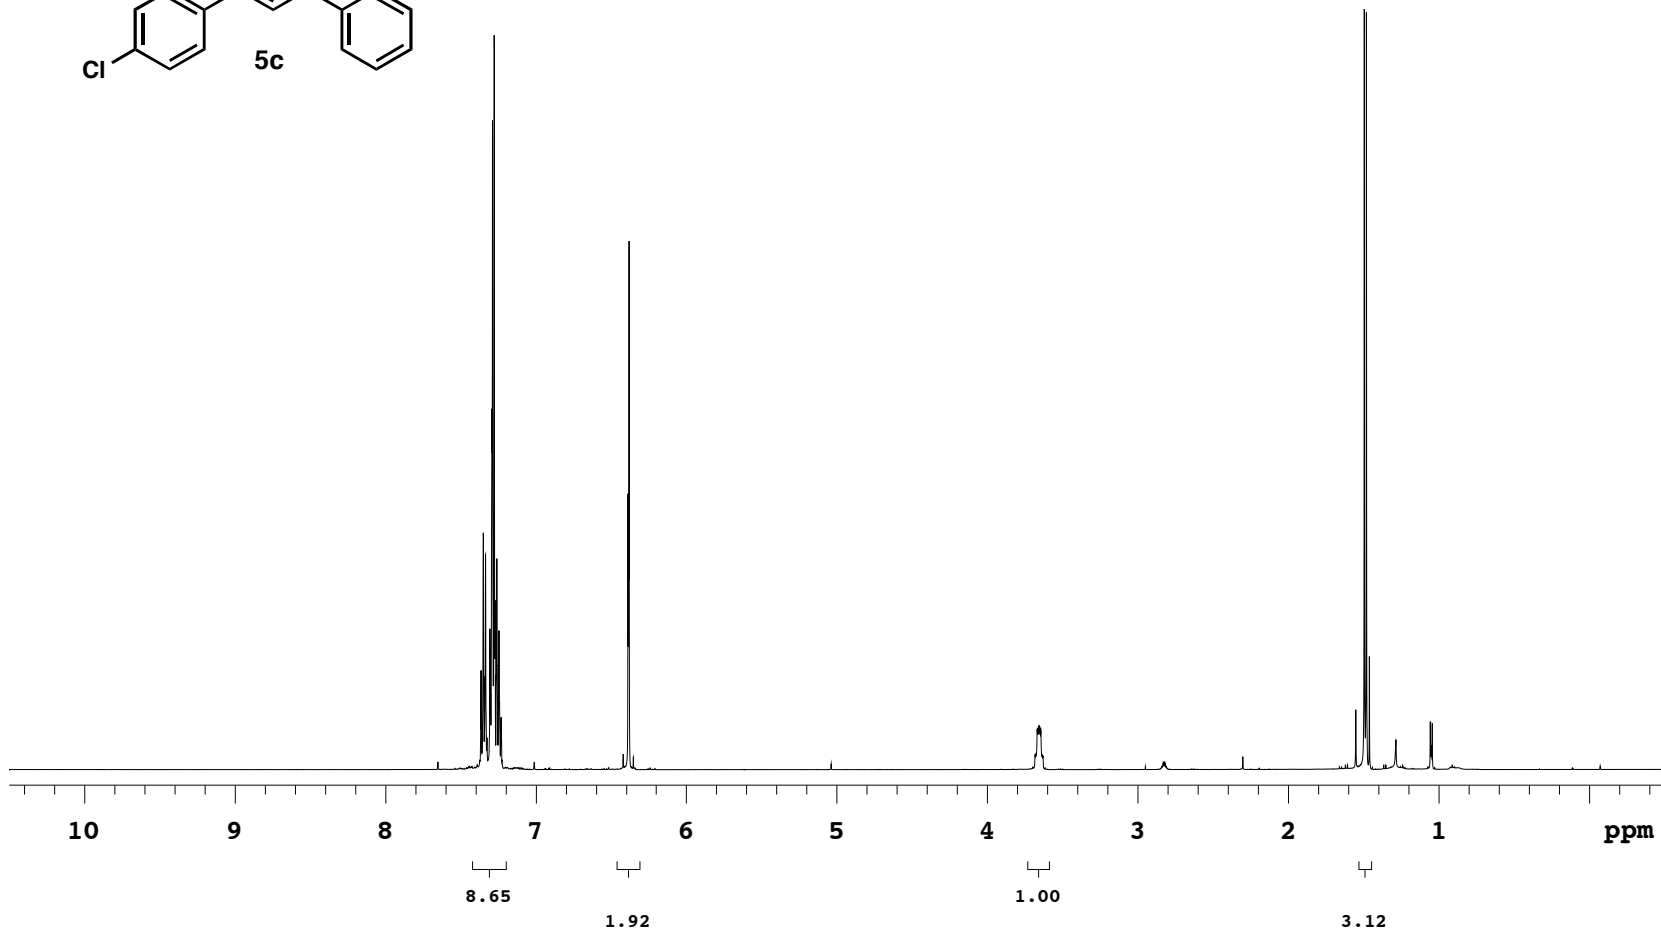

ahc-7-209-3

Sample Name **ahc-7-209-3**  
Date collected **2014-07-14**

Pulse sequence **CARBON**  
Solvent **cdcl3**

Temperature **25**  
Spectrometer **-vnmrs400**

Study owner **acherney**  
Operator **autouser**

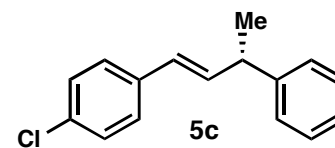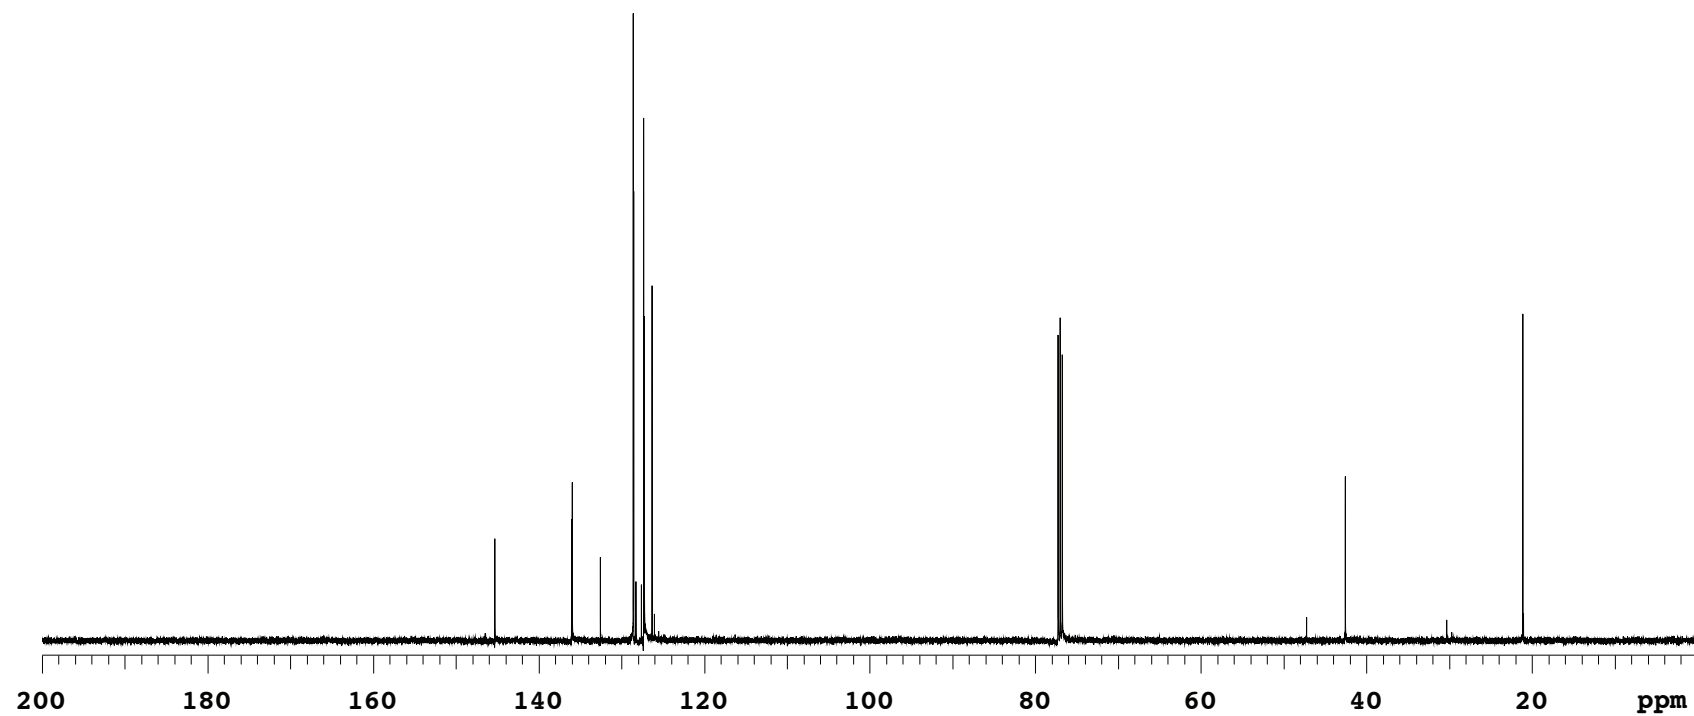

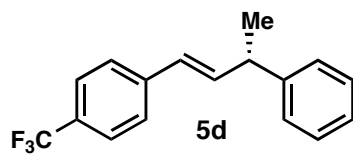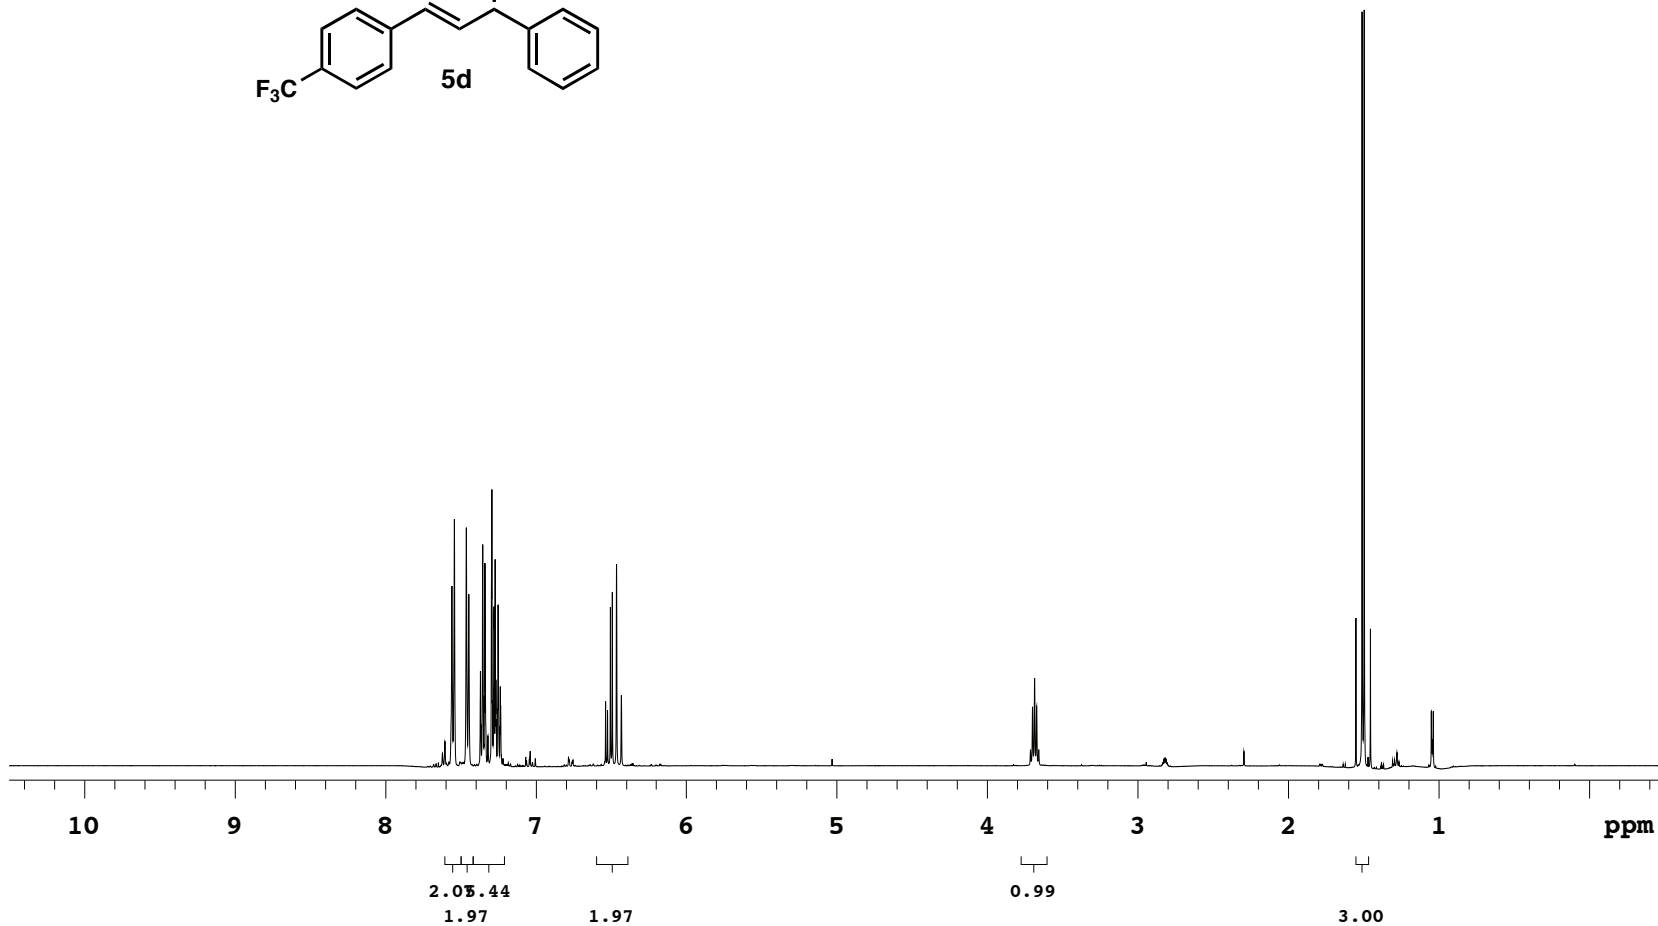

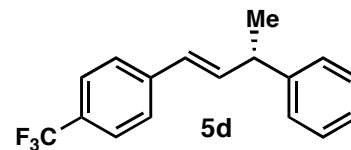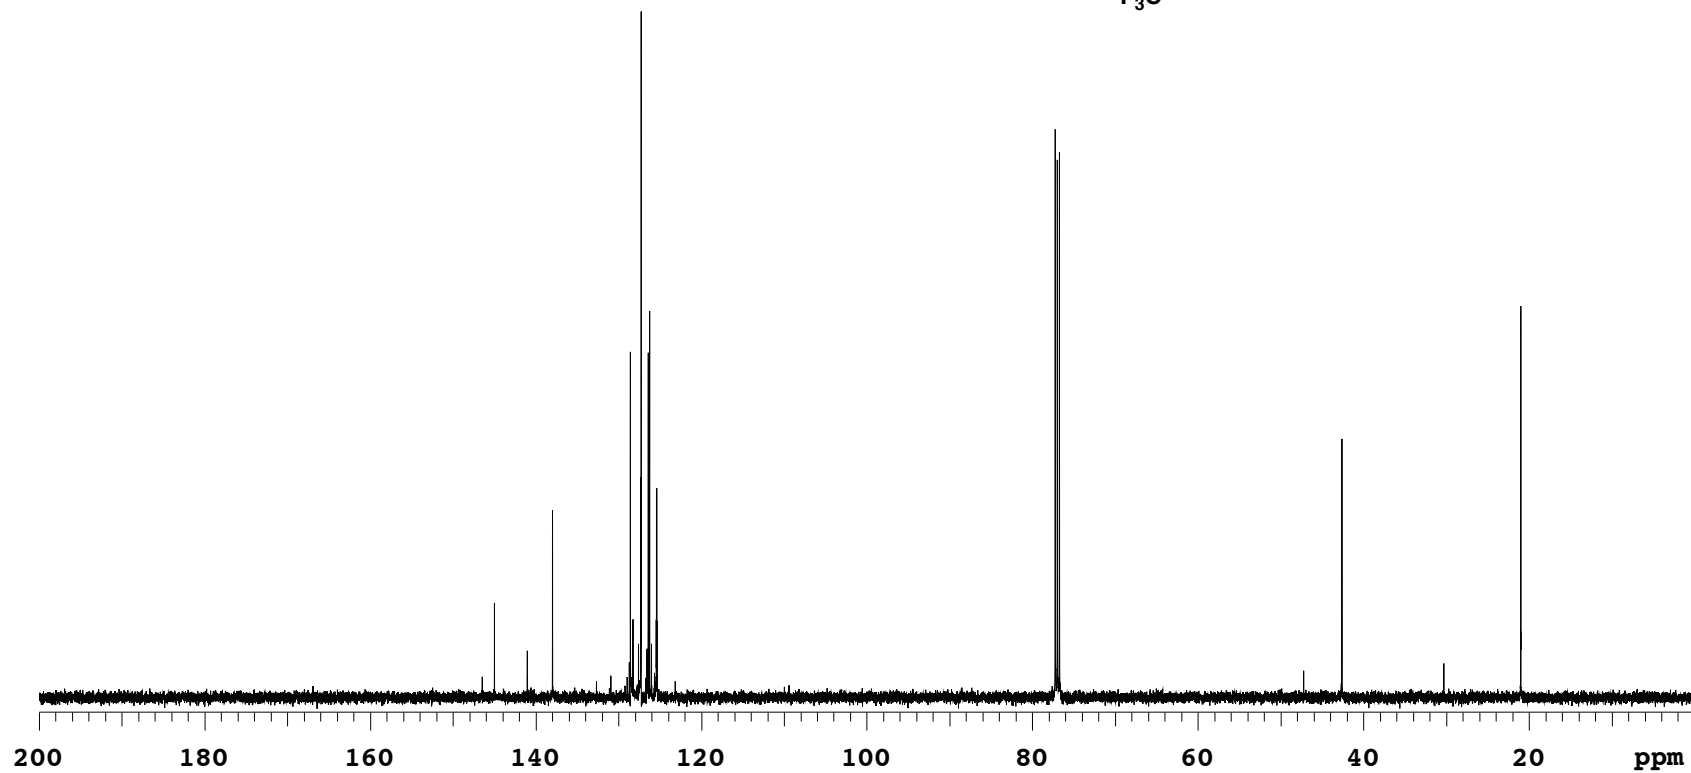

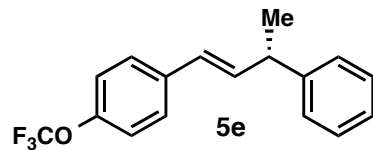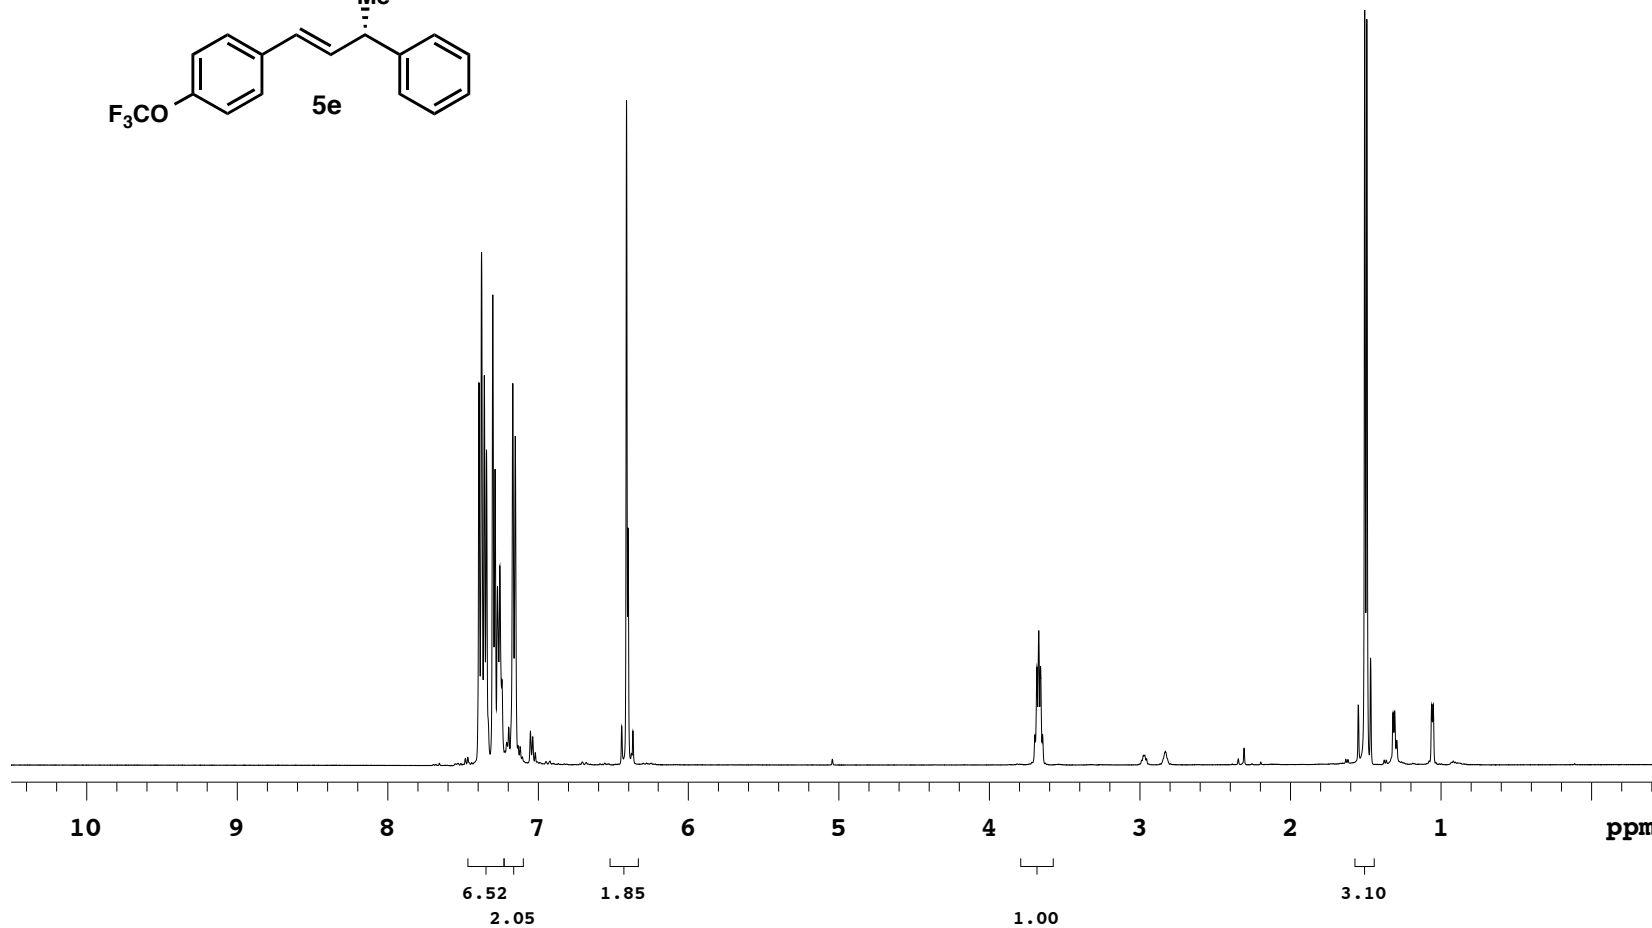

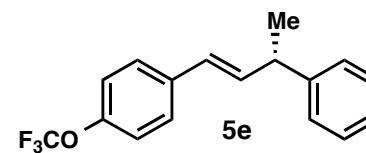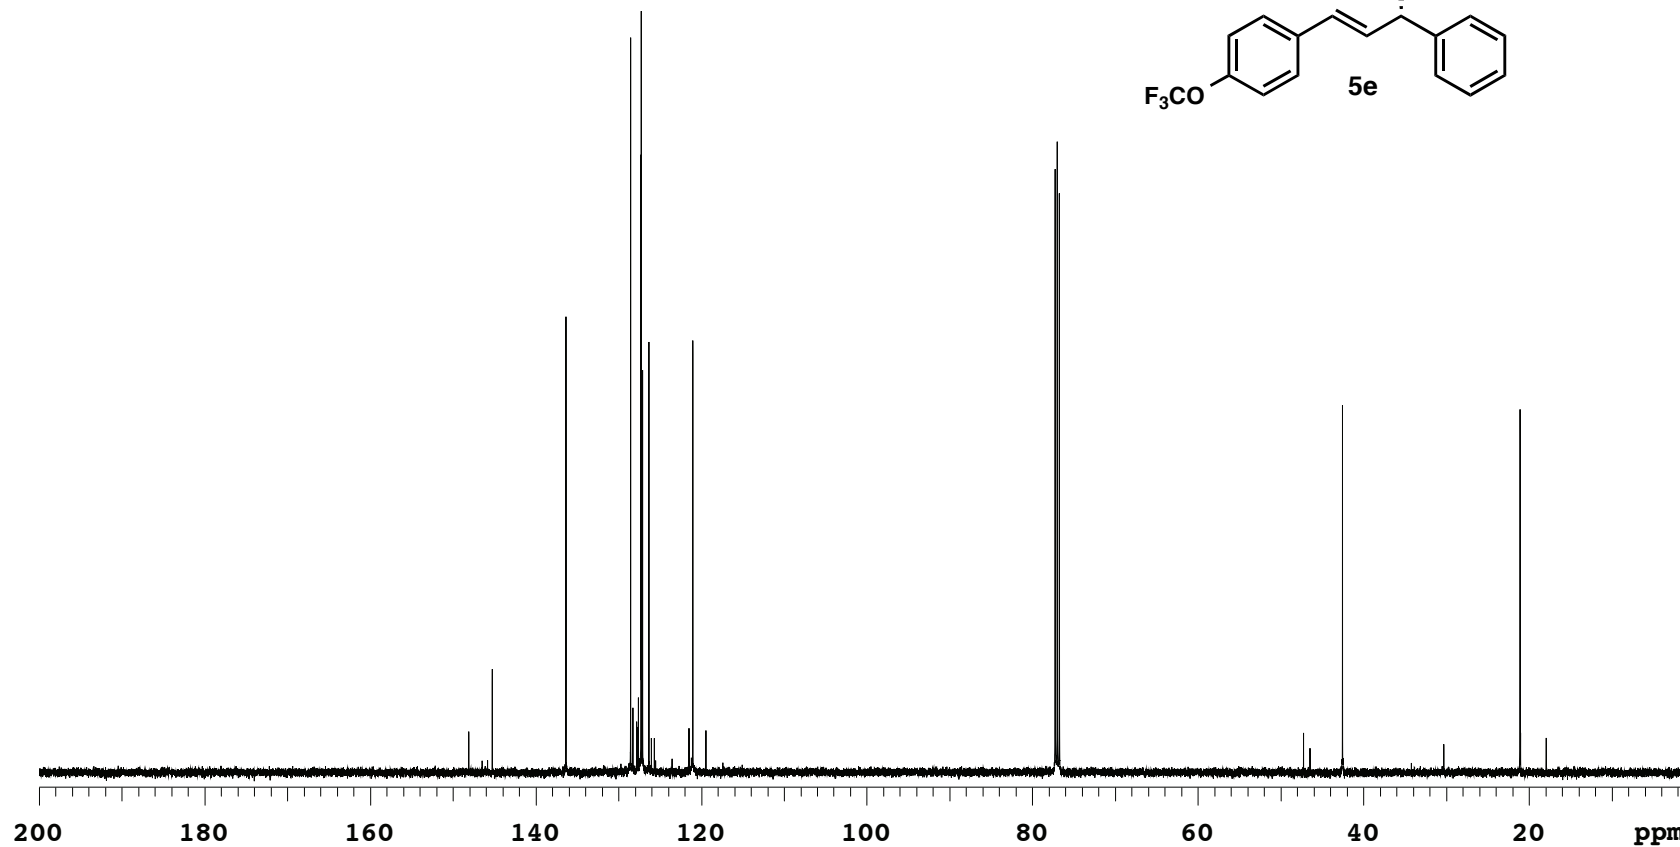



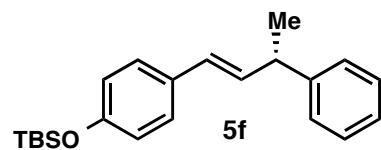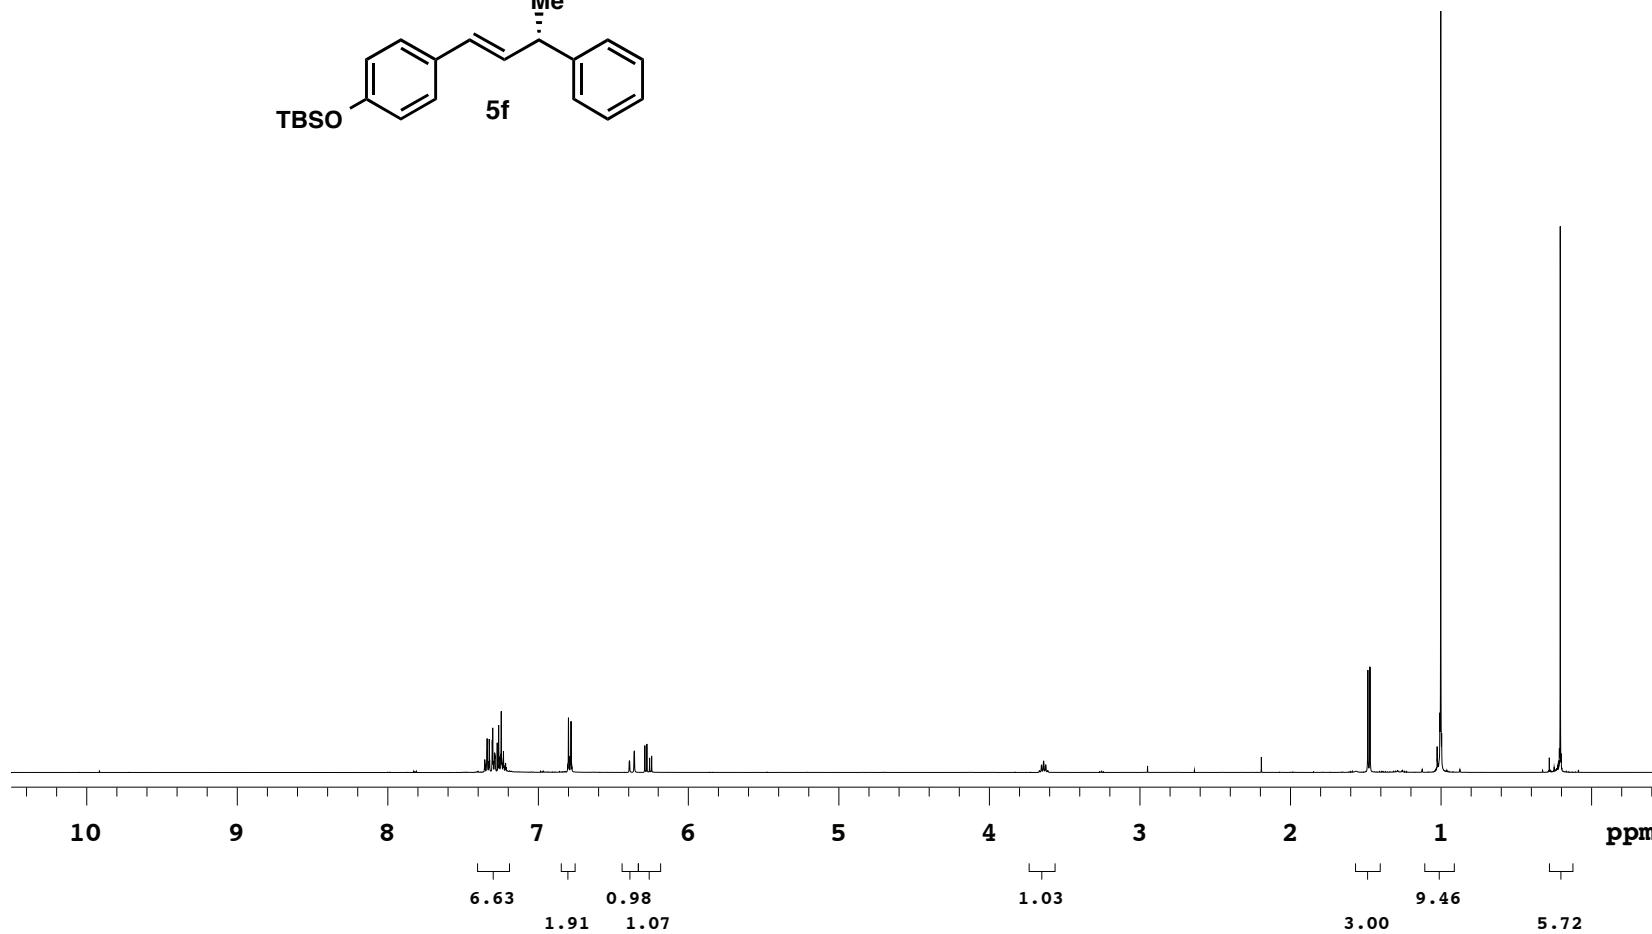

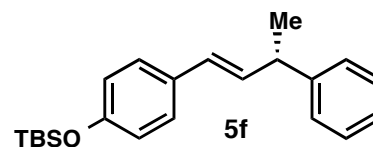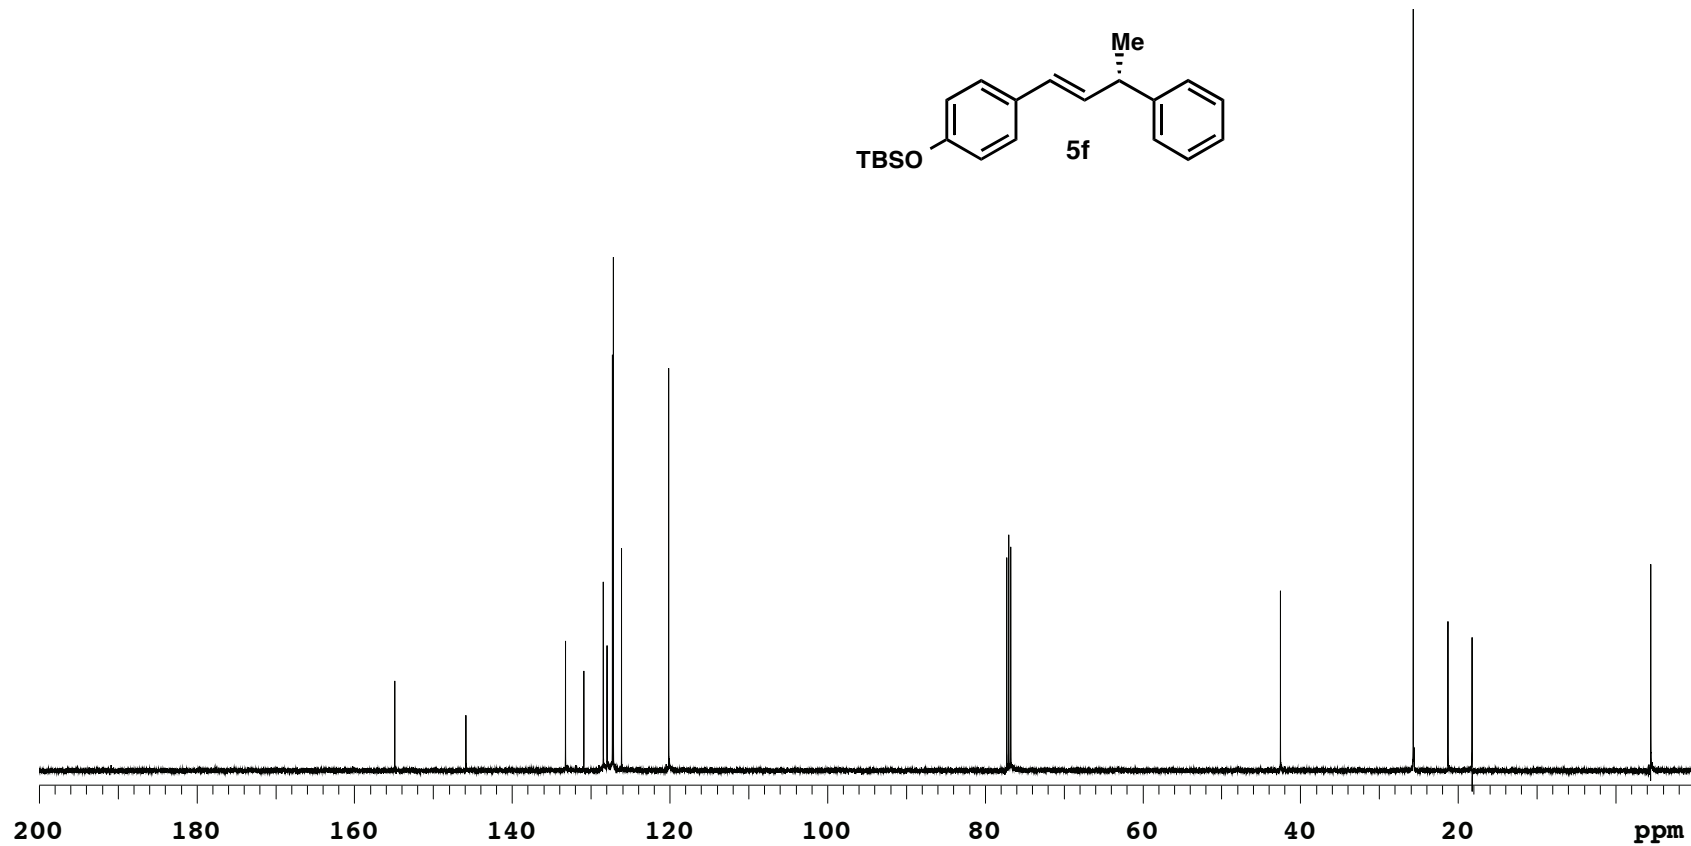

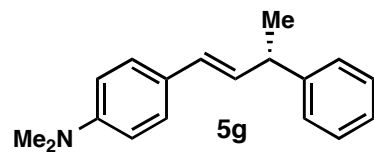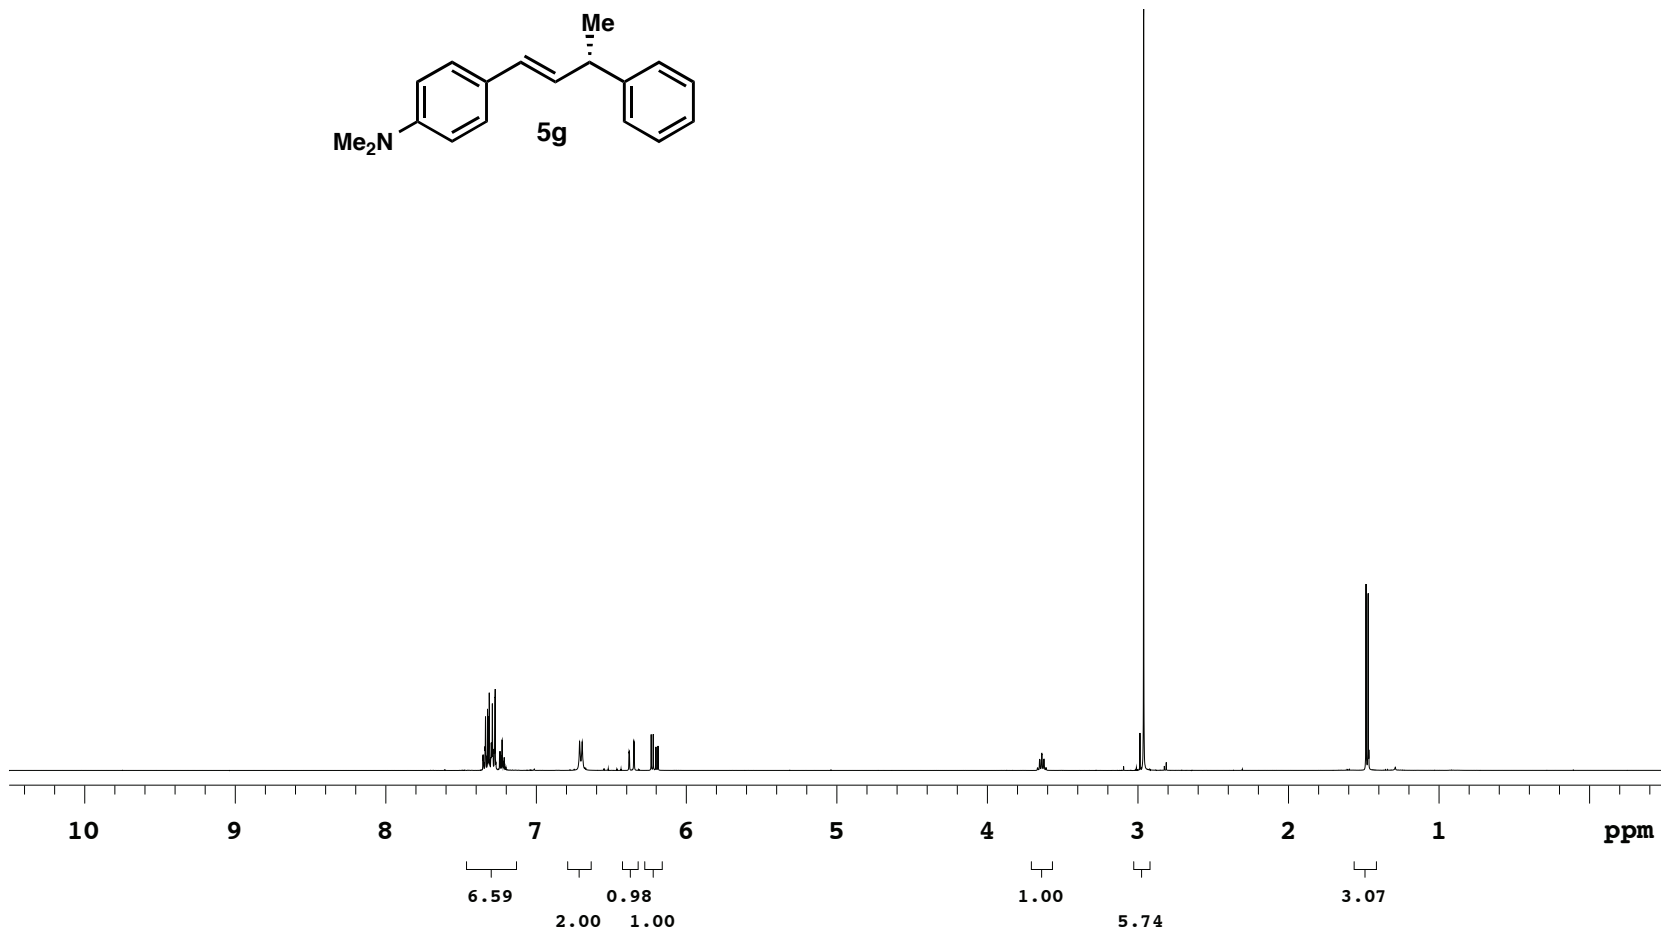

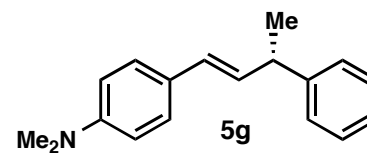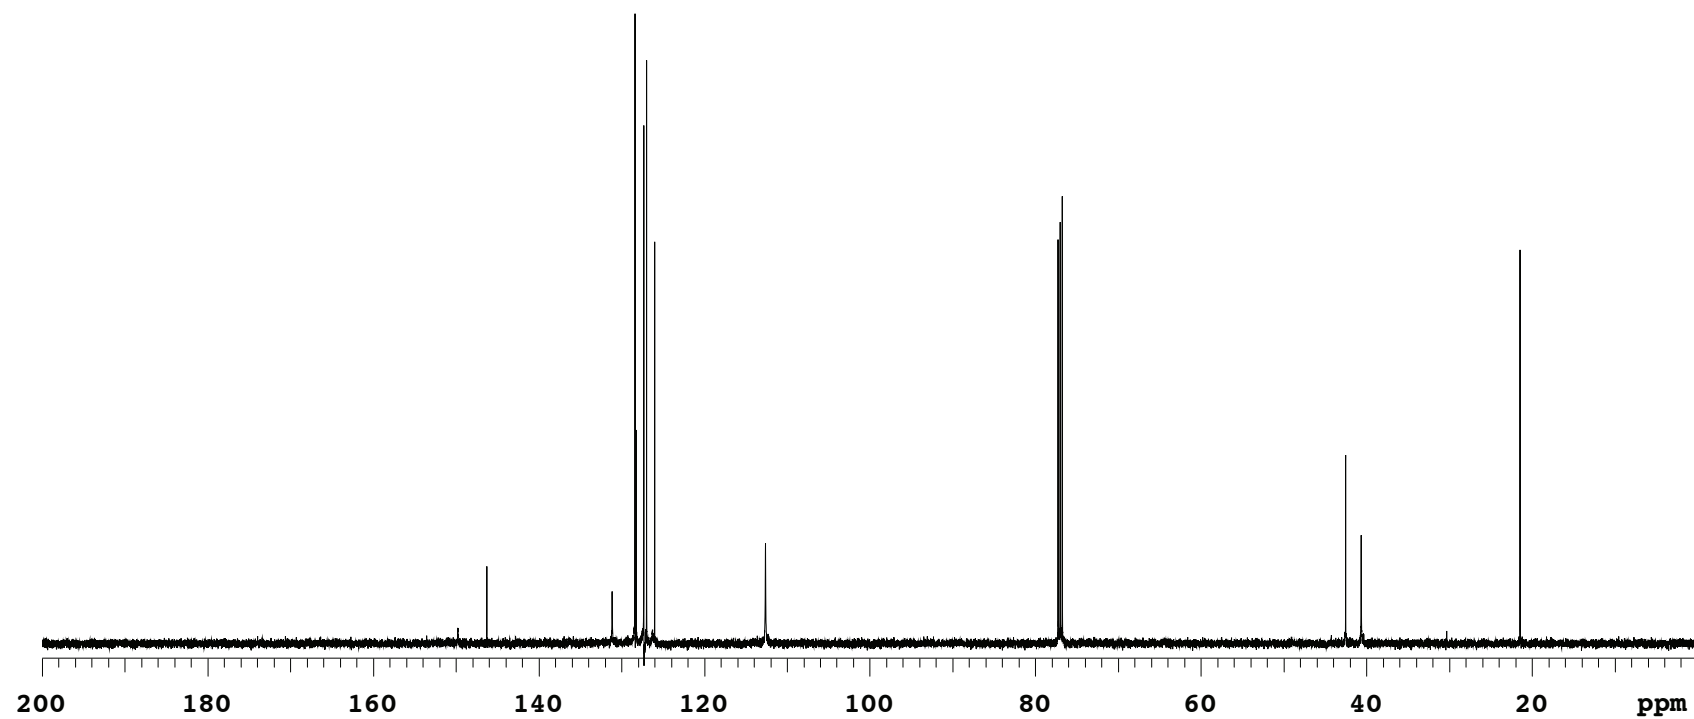

ahc-7-209-10

Sample Name **ahc-7-209-10**  
Date collected **2014-07-15**

Pulse sequence **PROTON**  
Solvent **cdcl3**

Temperature **25**  
Spectrometer **-vnmrs400**

Study owner **acherney**  
Operator **autouser**

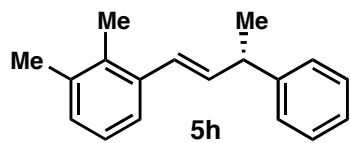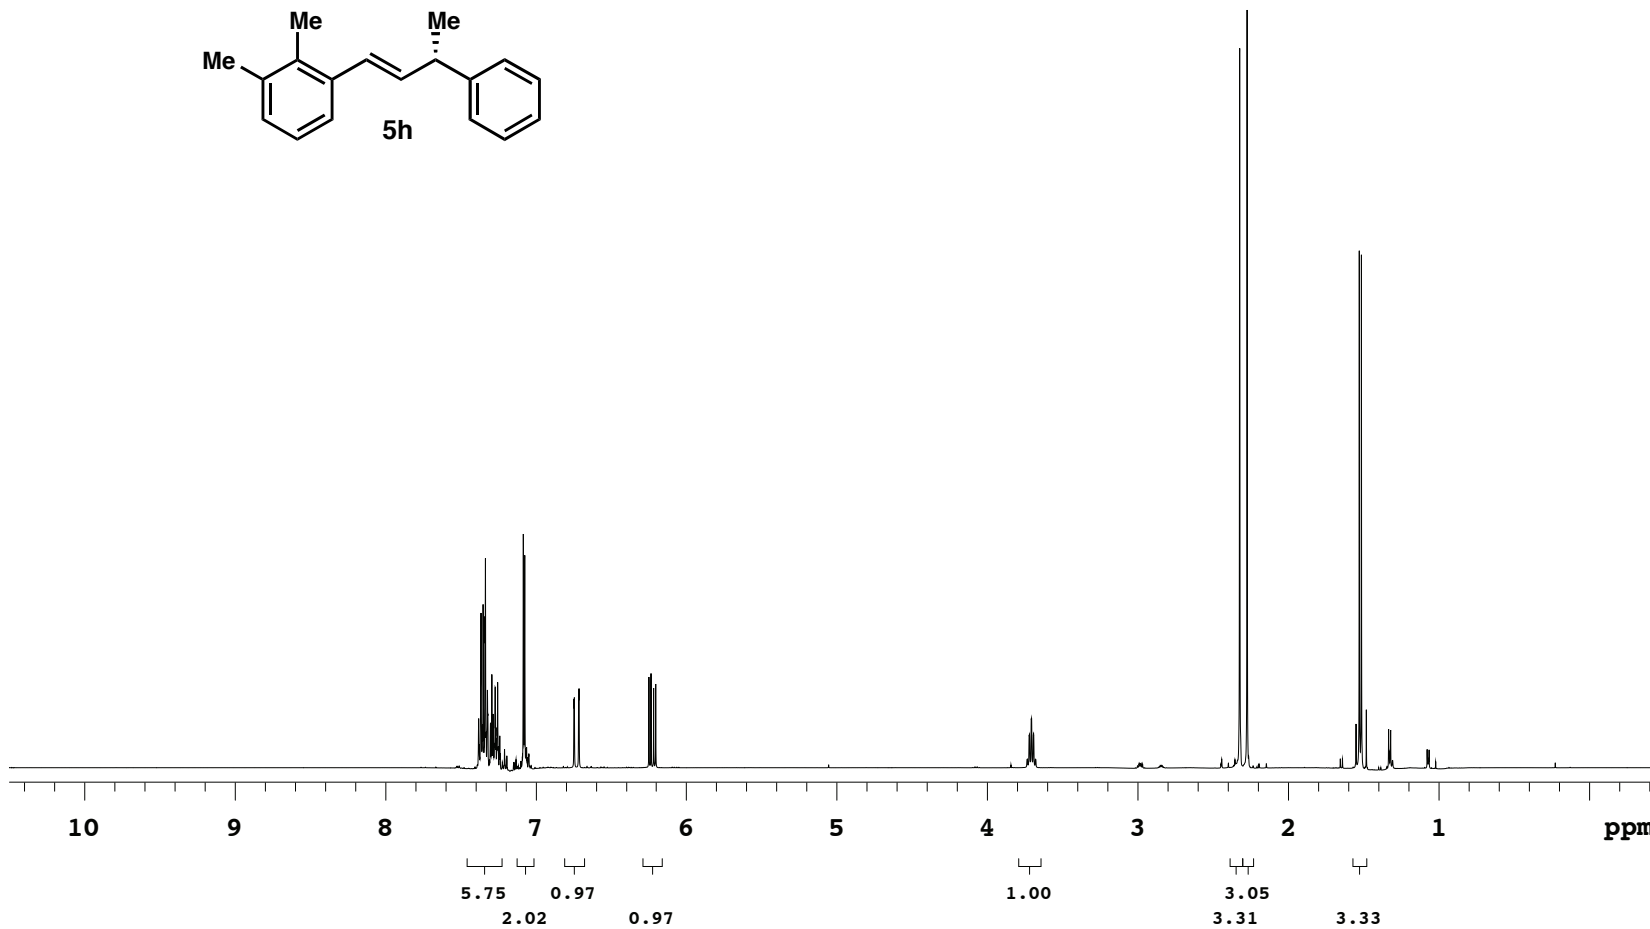

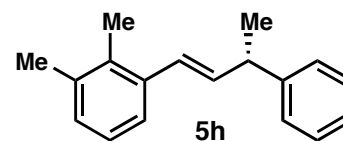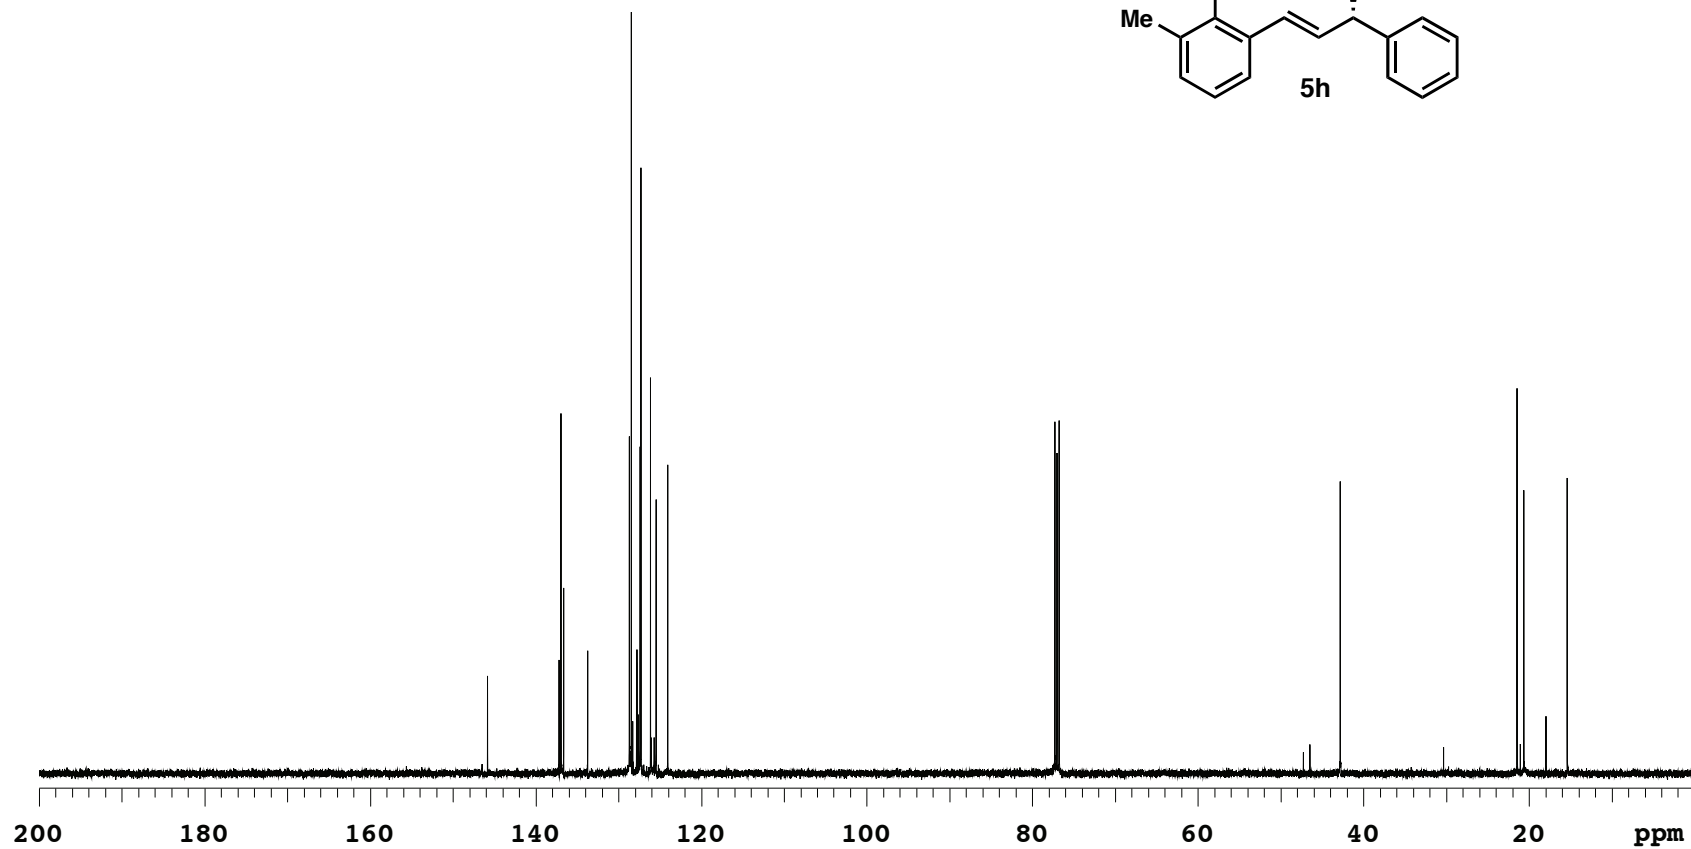

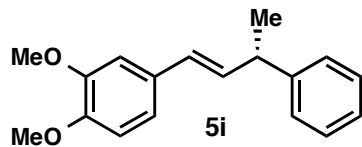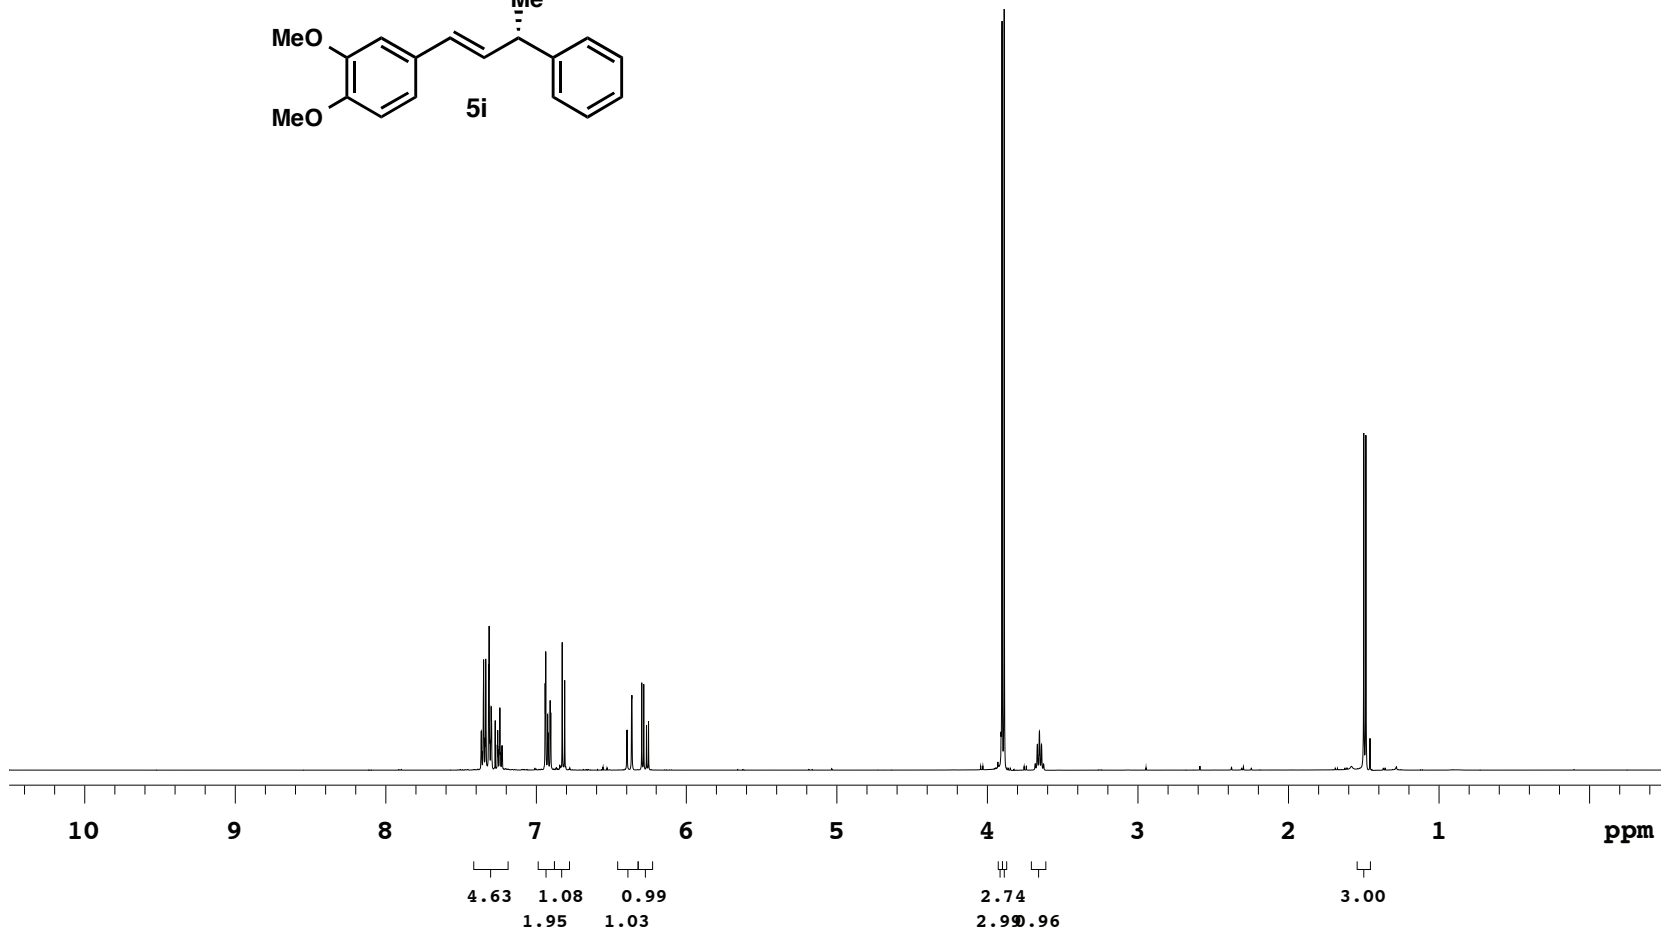

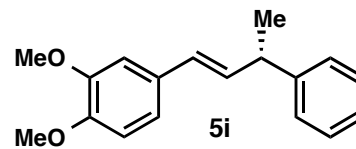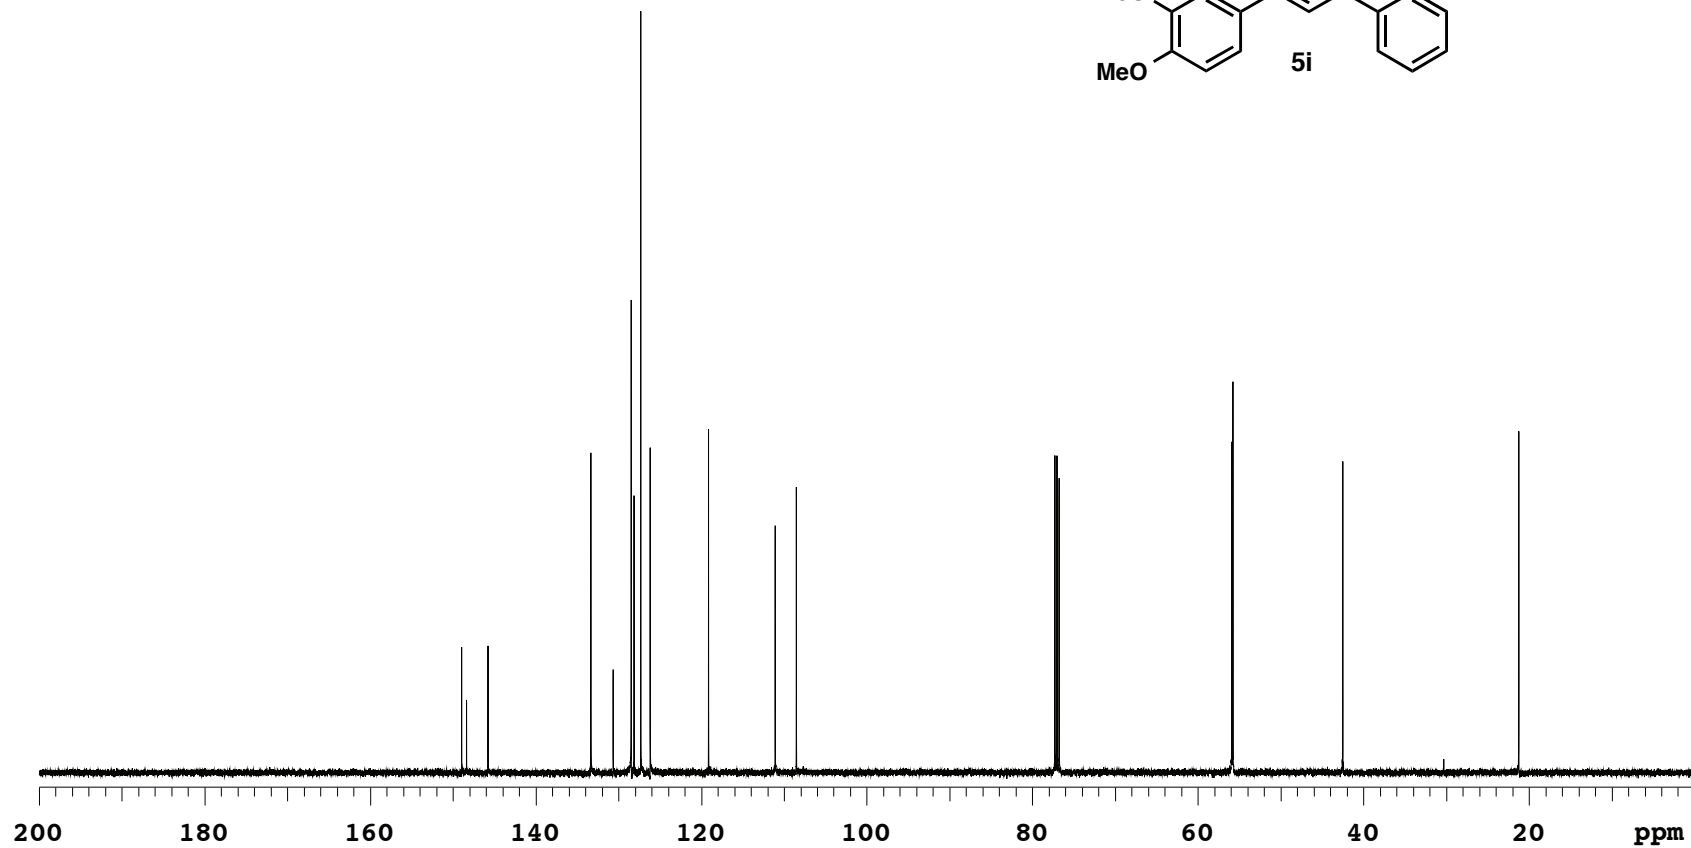



ahc-7-209-12

Sample Name **ahc-7-209-12**  
Date collected **2014-07-14**

Pulse sequence **PROTON**  
Solvent **cdcl3**

Temperature **25**  
Spectrometer **-vnmrs400**

Study owner **acherney**  
Operator **autouser**

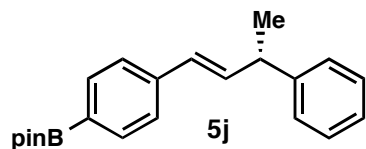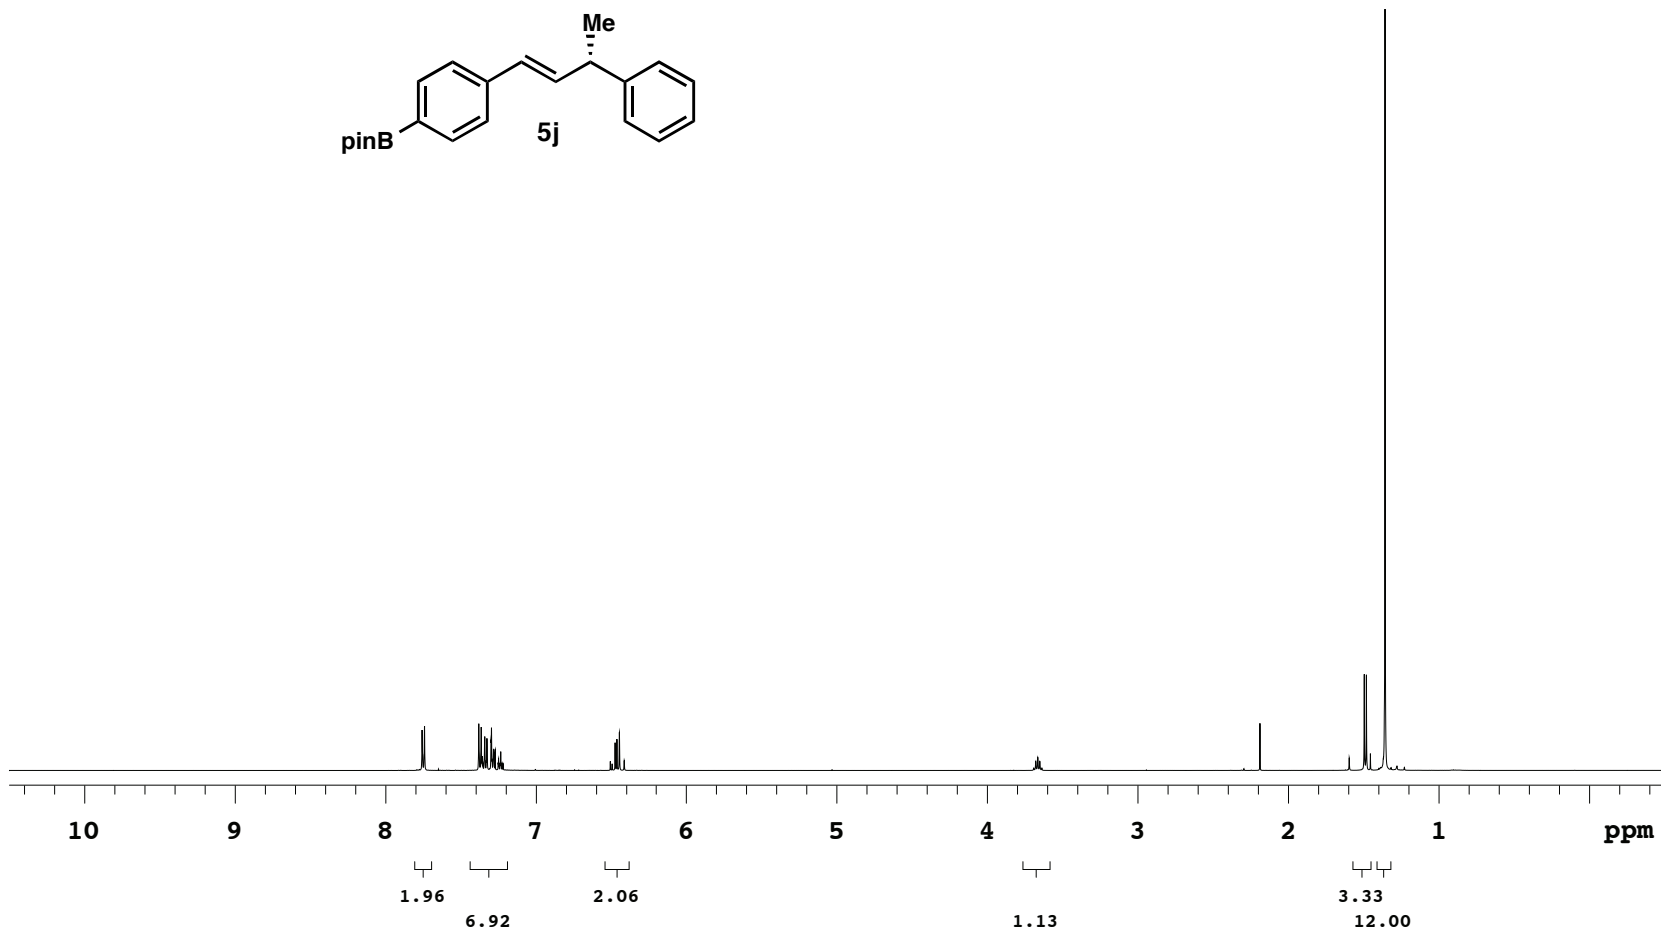

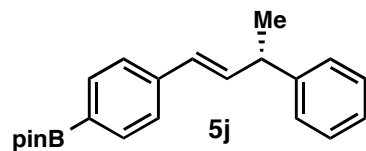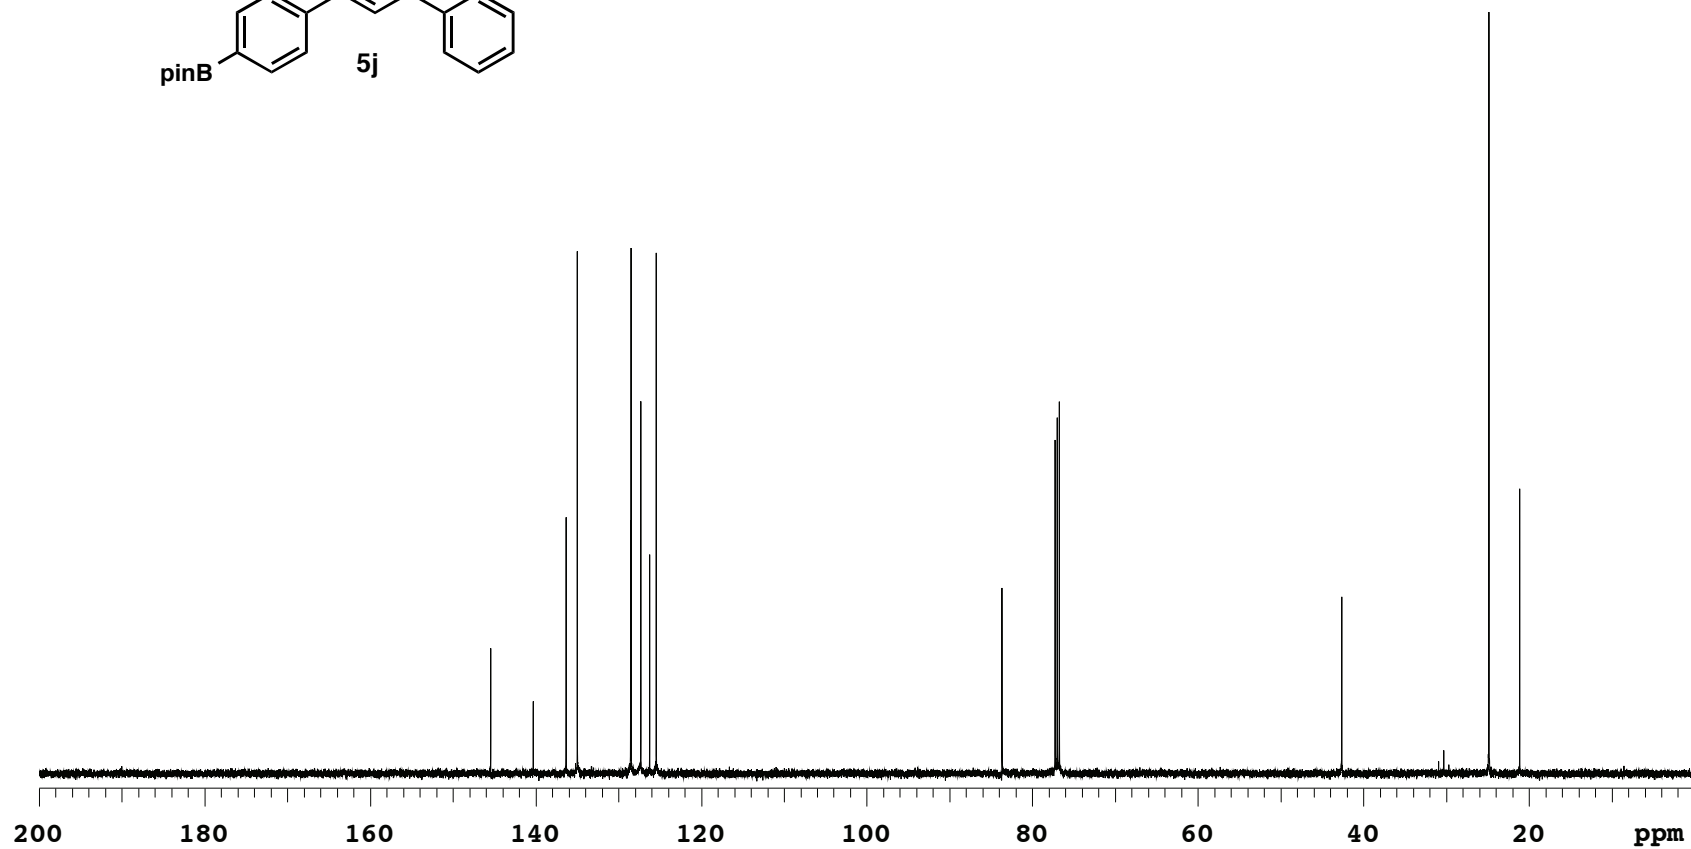

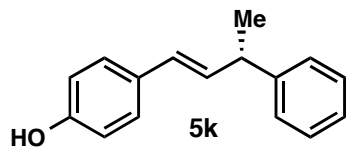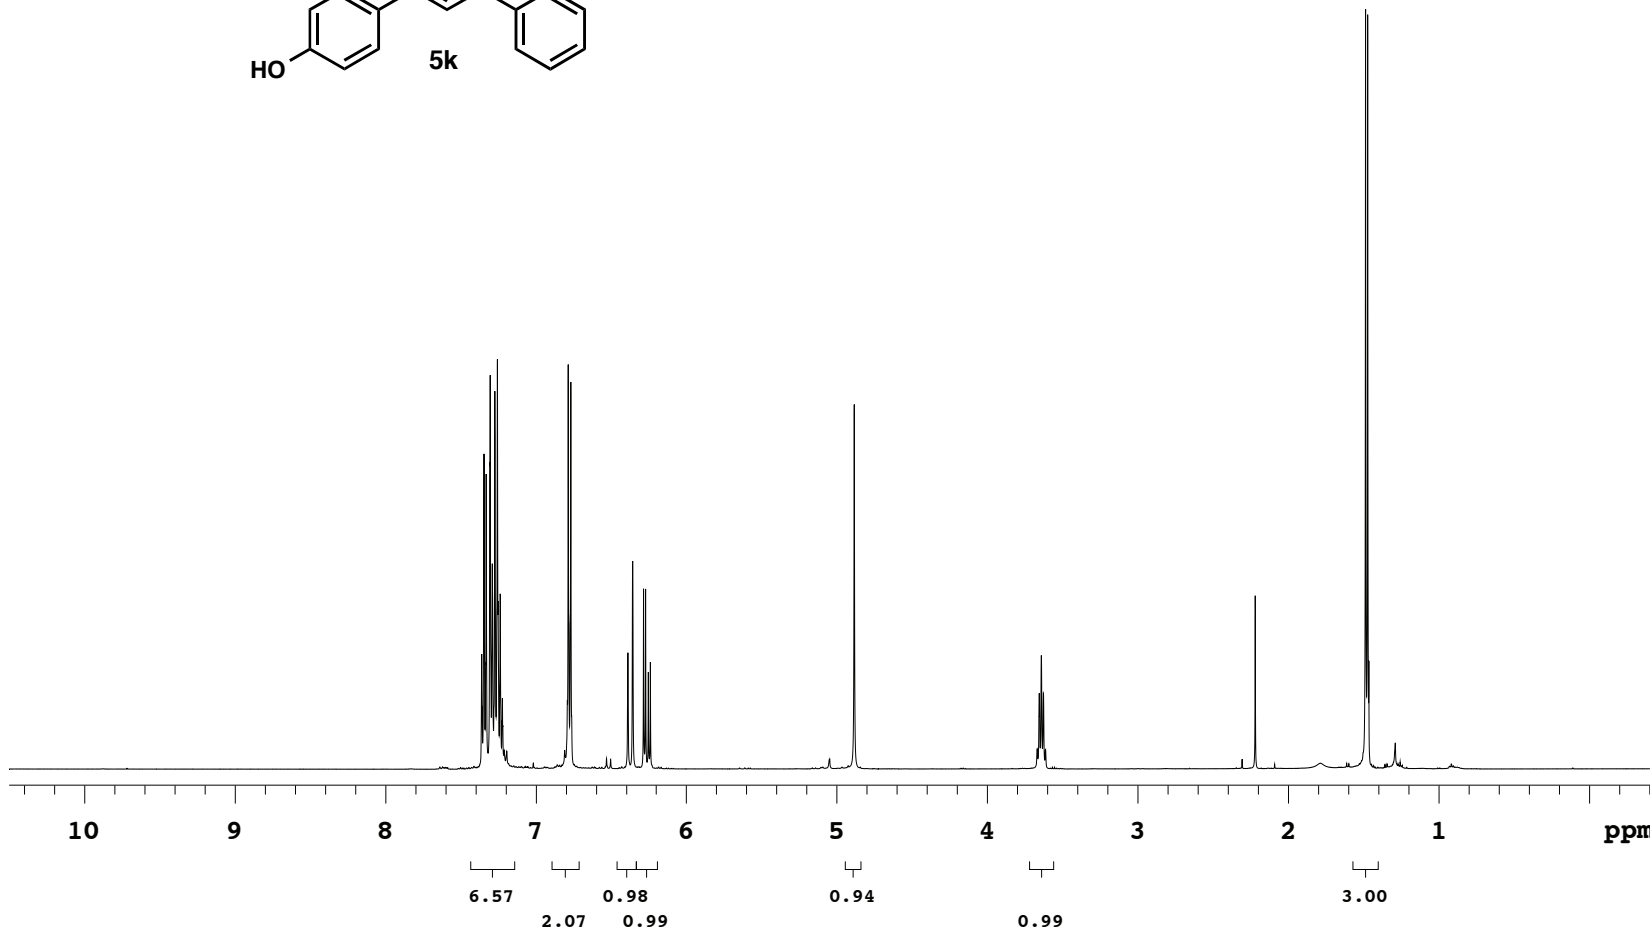

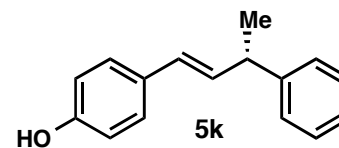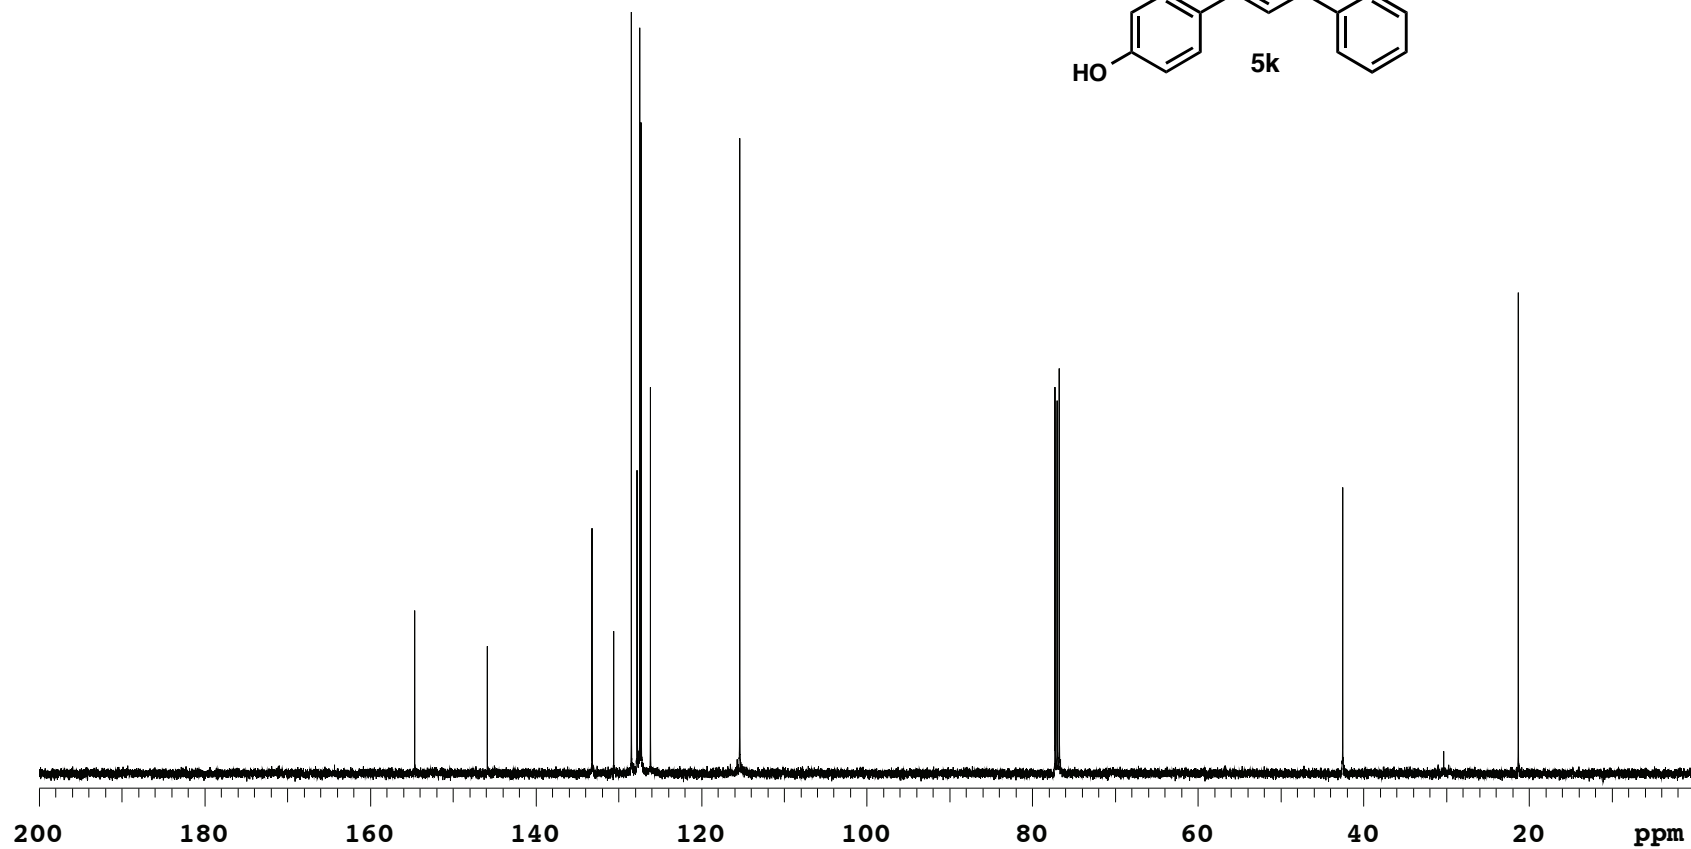

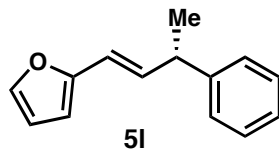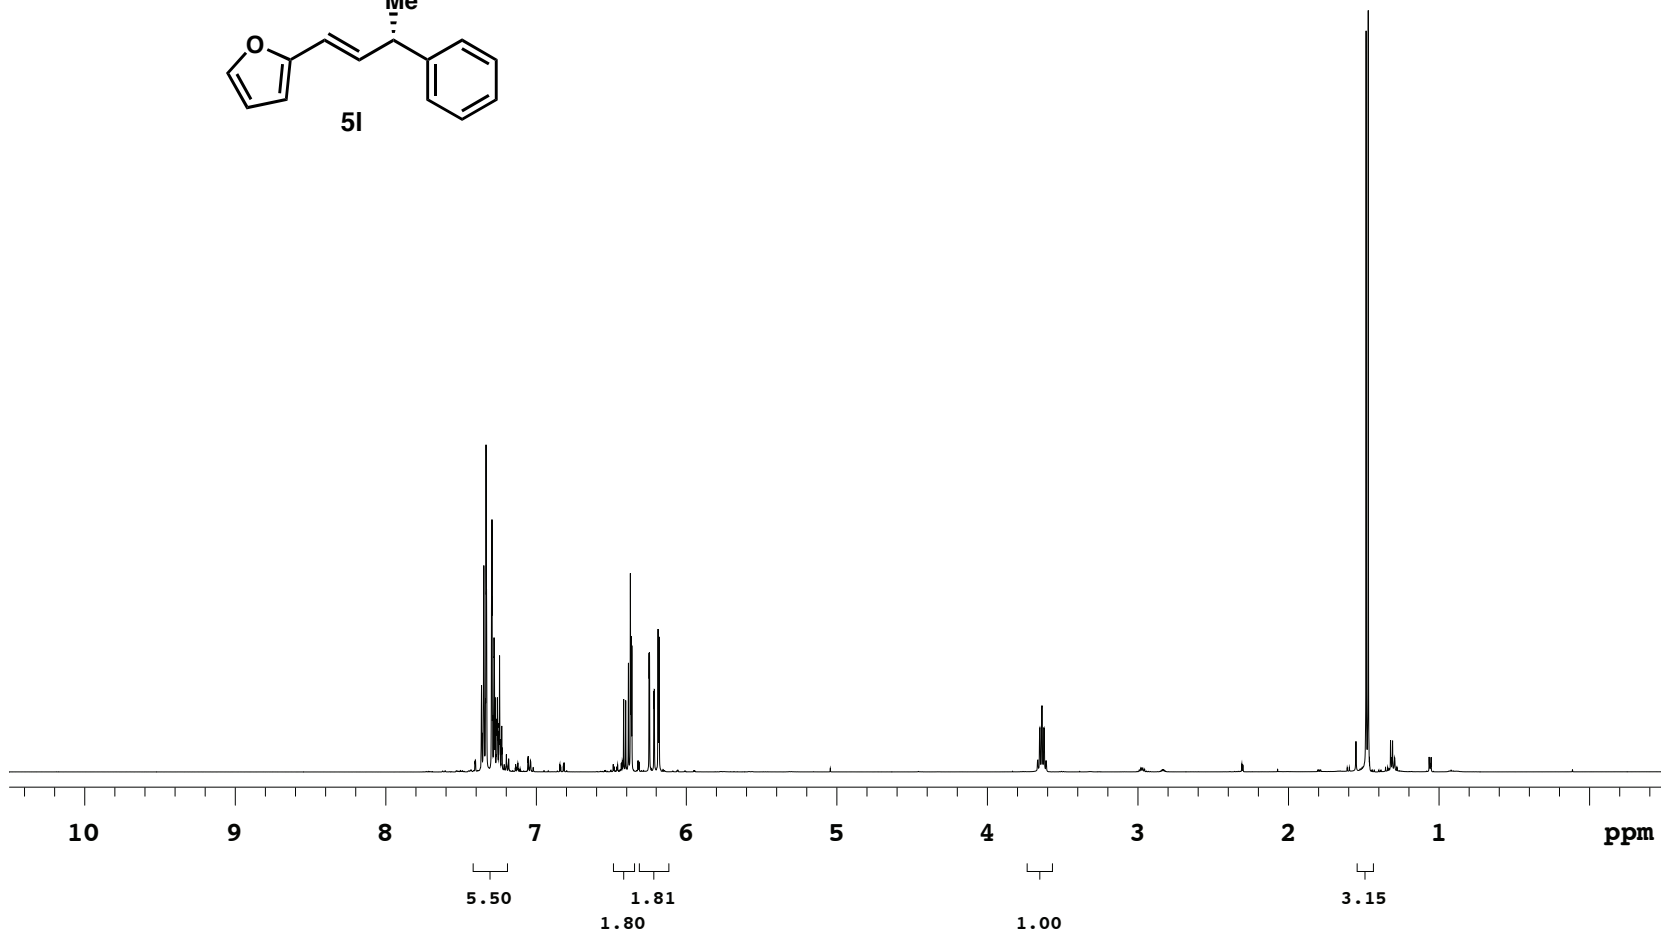

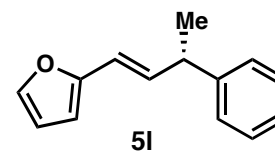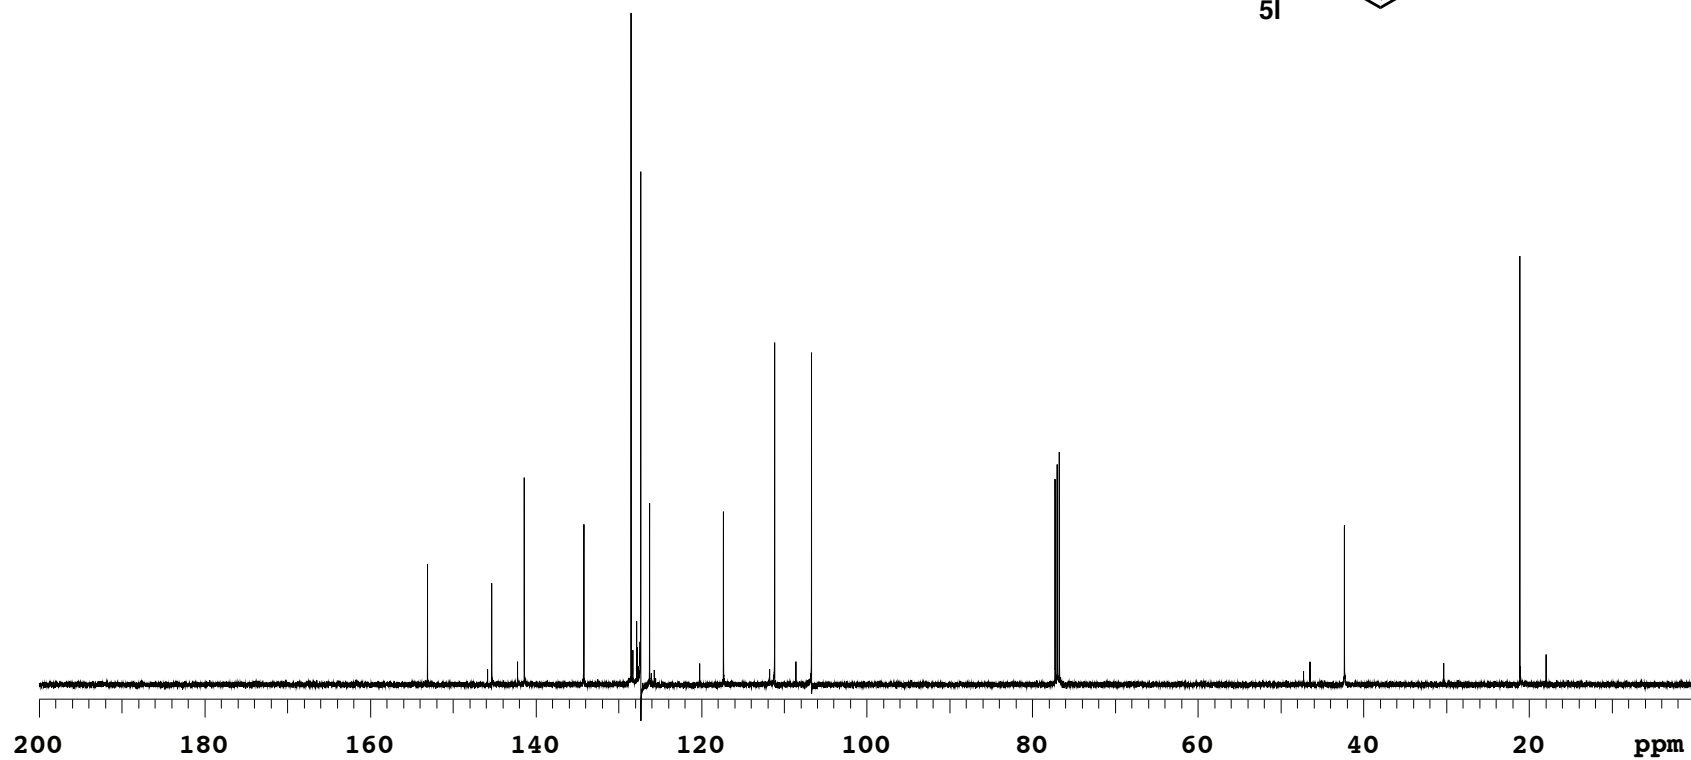

ahc-7-255-5

Sample Name **ahc-7-255-5**  
Date collected **2014-07-13**

Pulse sequence **PROTON**  
Solvent **cdcl3**

Temperature **25**  
Spectrometer **-vnmrs400**

Study owner **acherney**  
Operator **autouser**

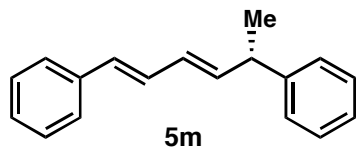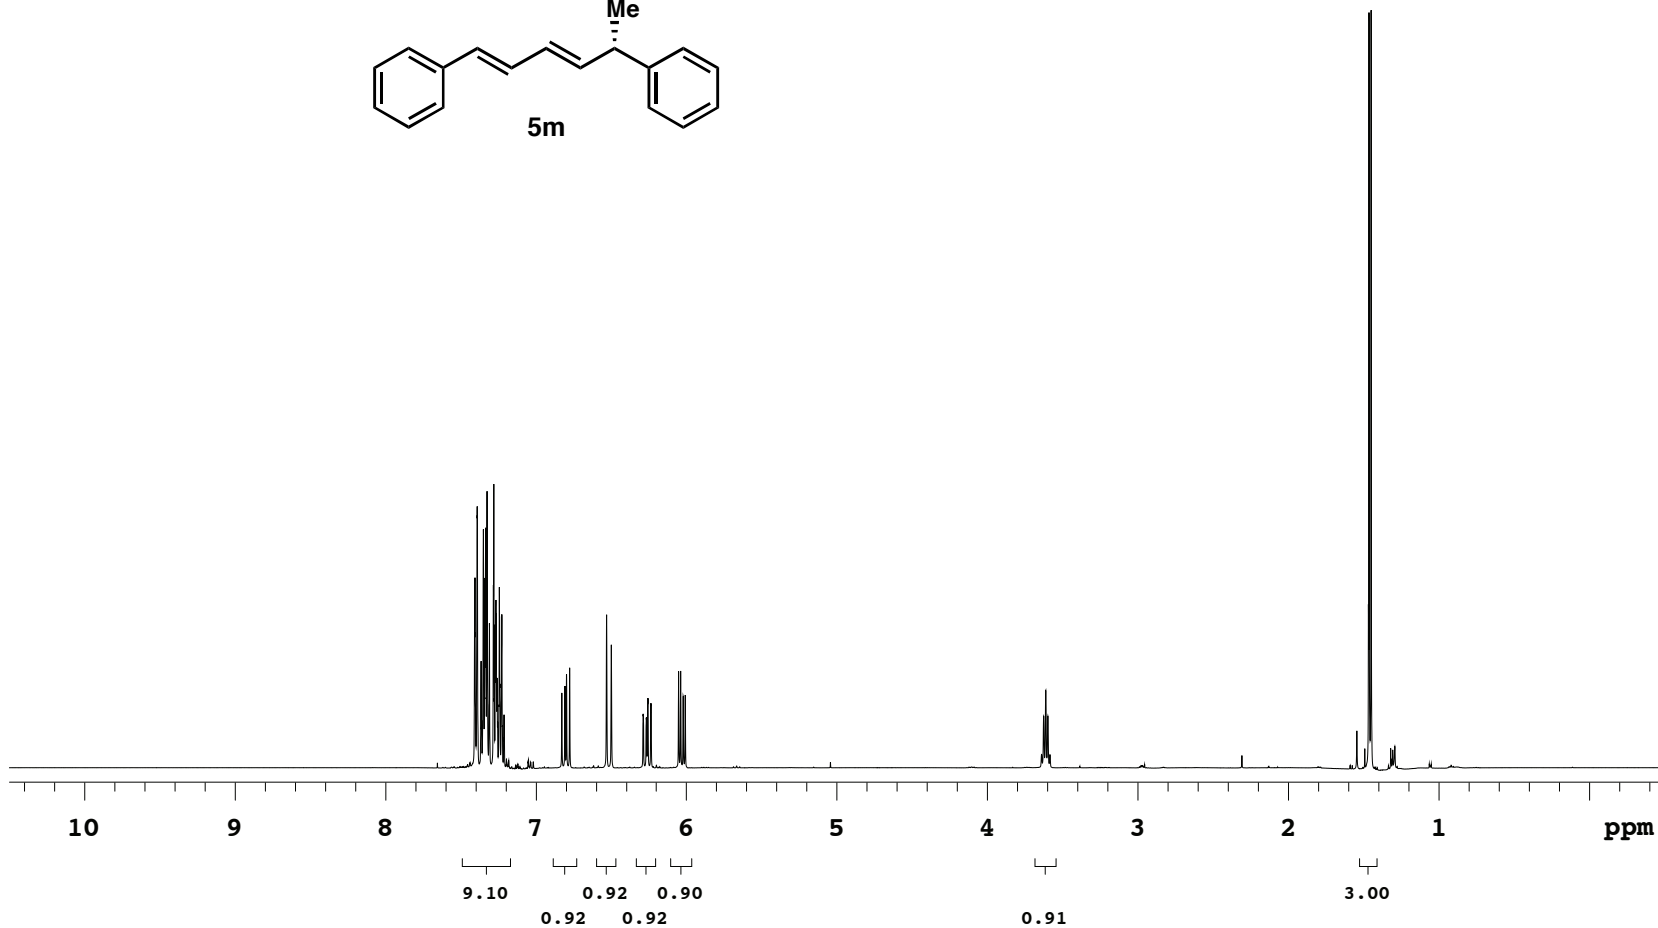

ahc-7-255-5

Sample Name **ahc-7-255-5**  
Date collected **2014-07-13**

Pulse sequence **CARBON**  
Solvent **cdcl3**

Temperature **25**  
Spectrometer **-vnmrs400**

Study owner **acherney**  
Operator **autouser**

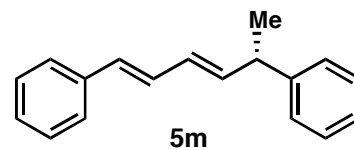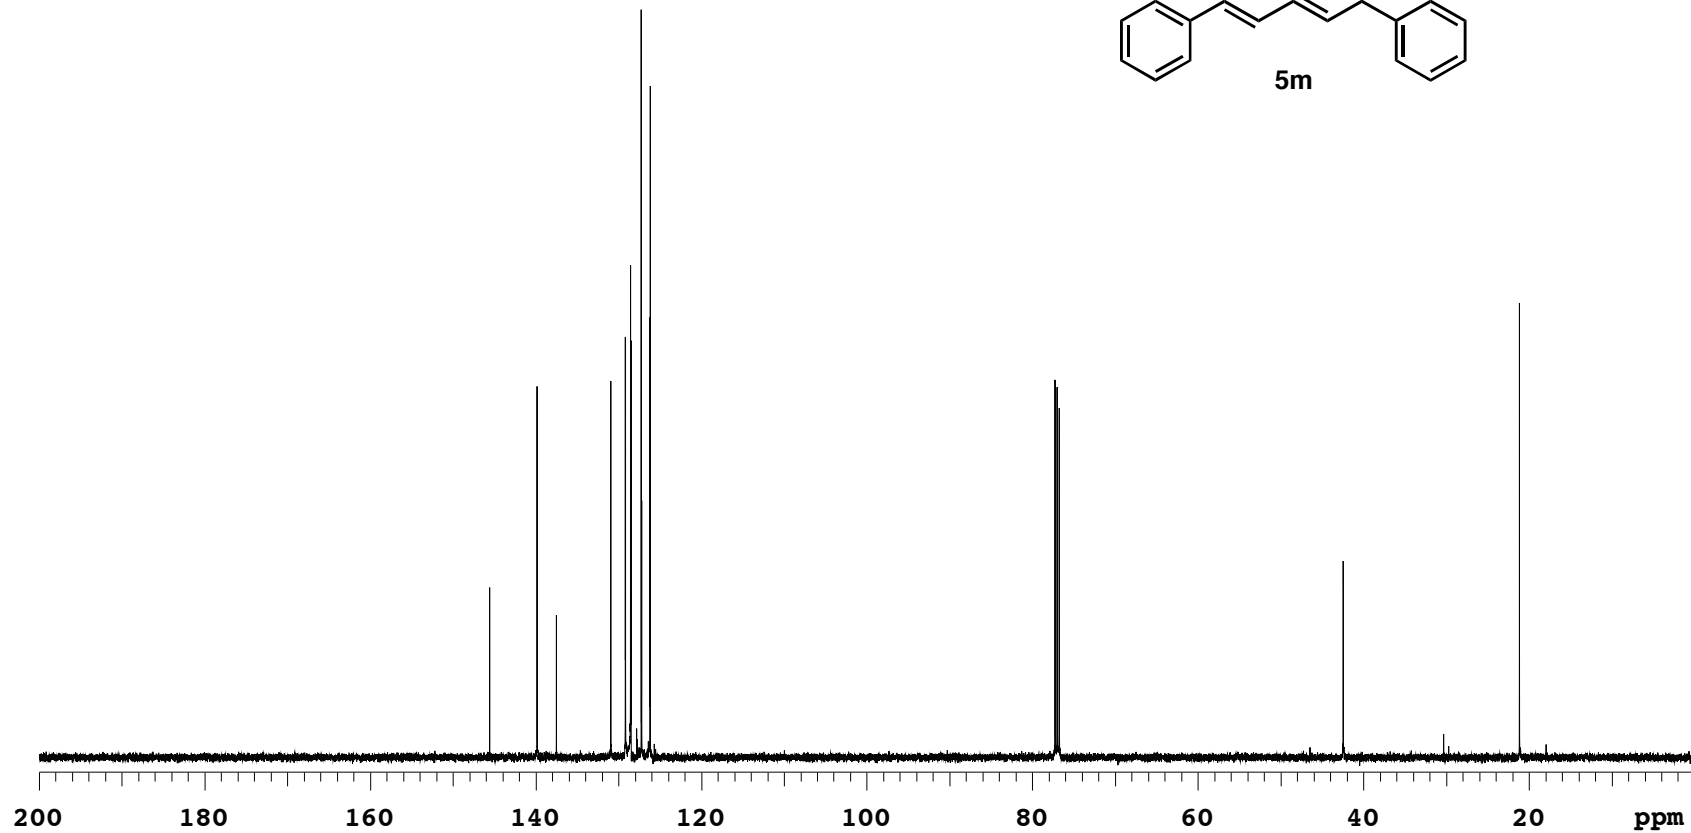



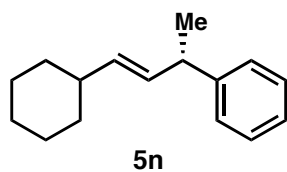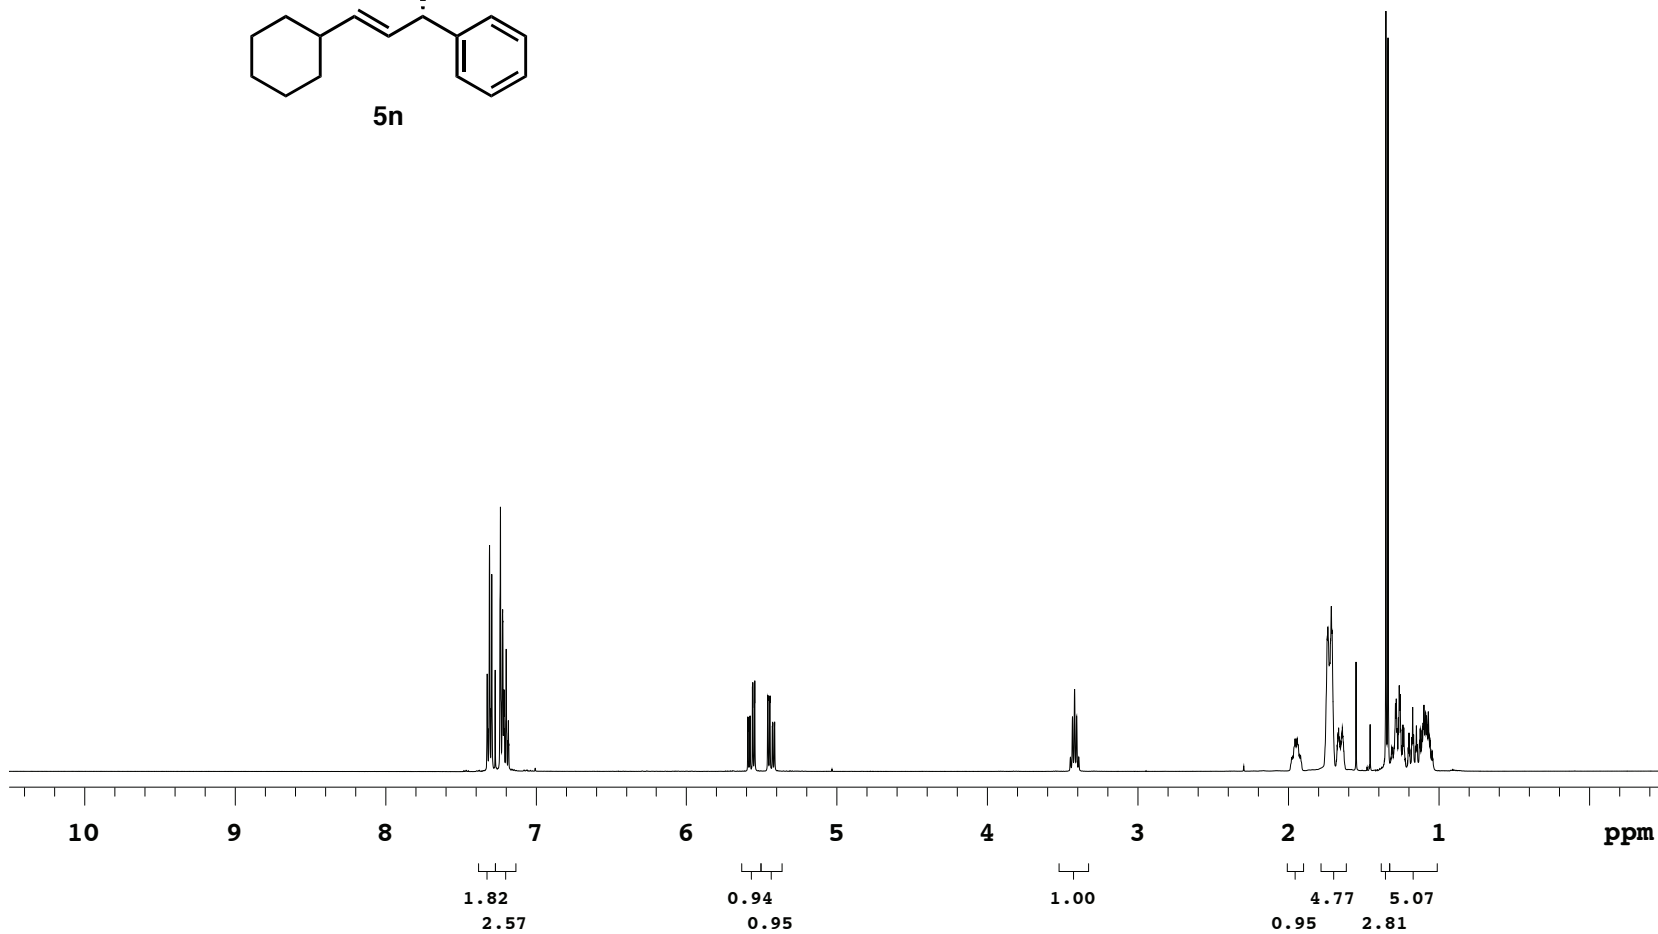

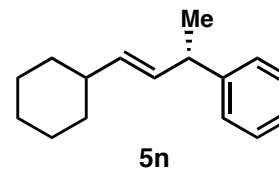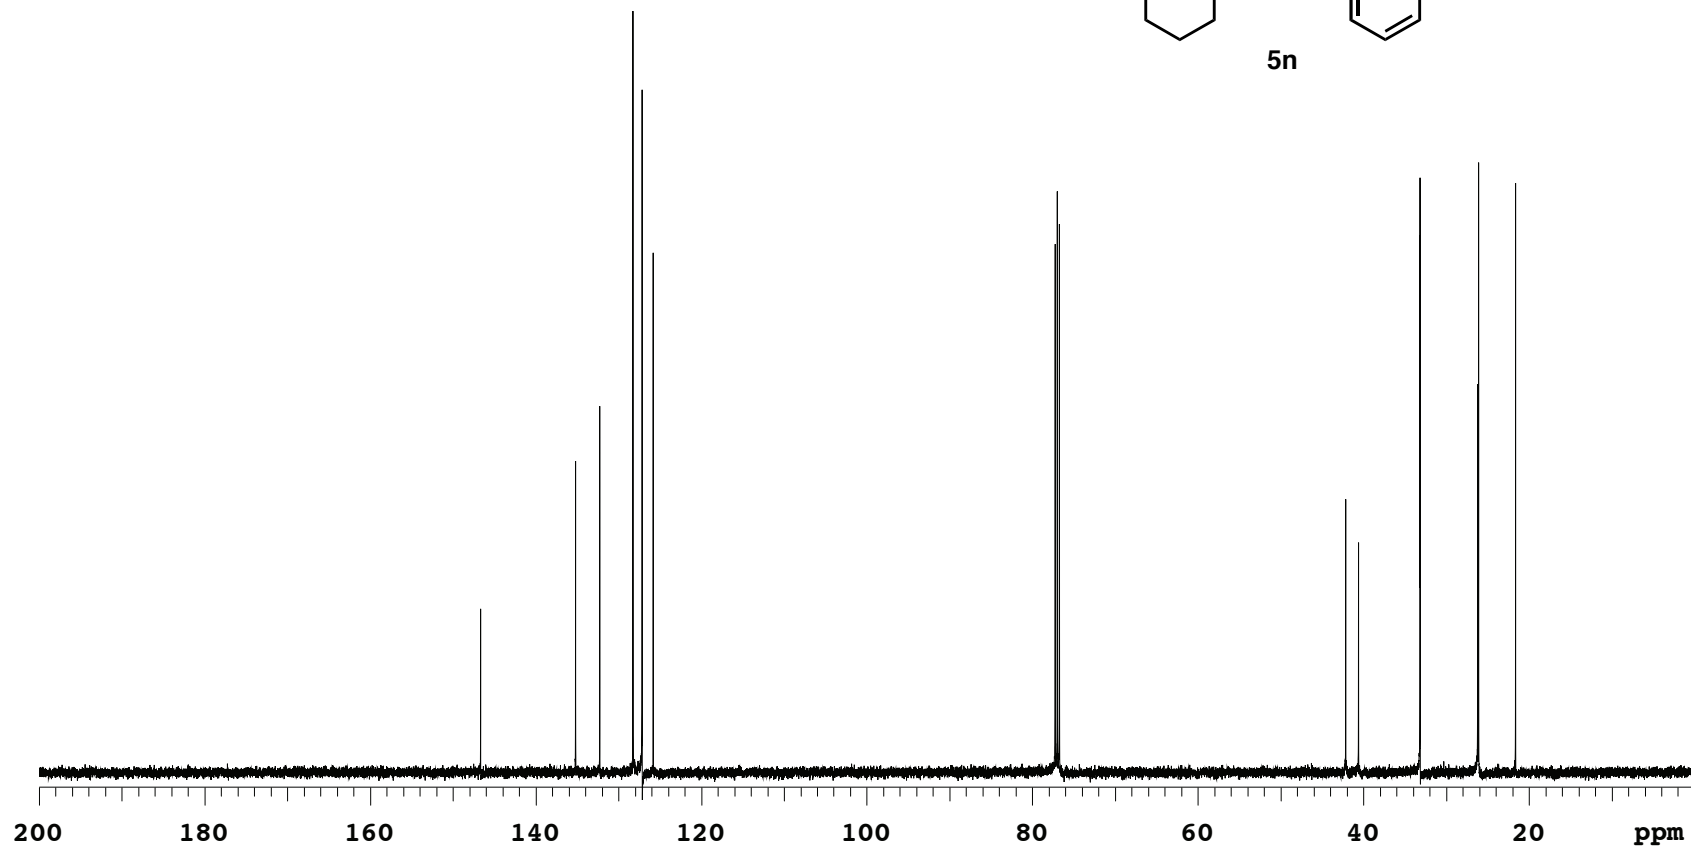

ahc-7-239-4

Sample Name **ahc-7-239-4**  
Date collected **2014-07-13**

Pulse sequence **PROTON**  
Solvent **cdcl3**

Temperature **25**  
Spectrometer **-vnmrs400**

Study owner **acherney**  
Operator **autouser**

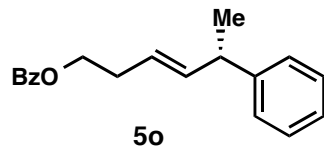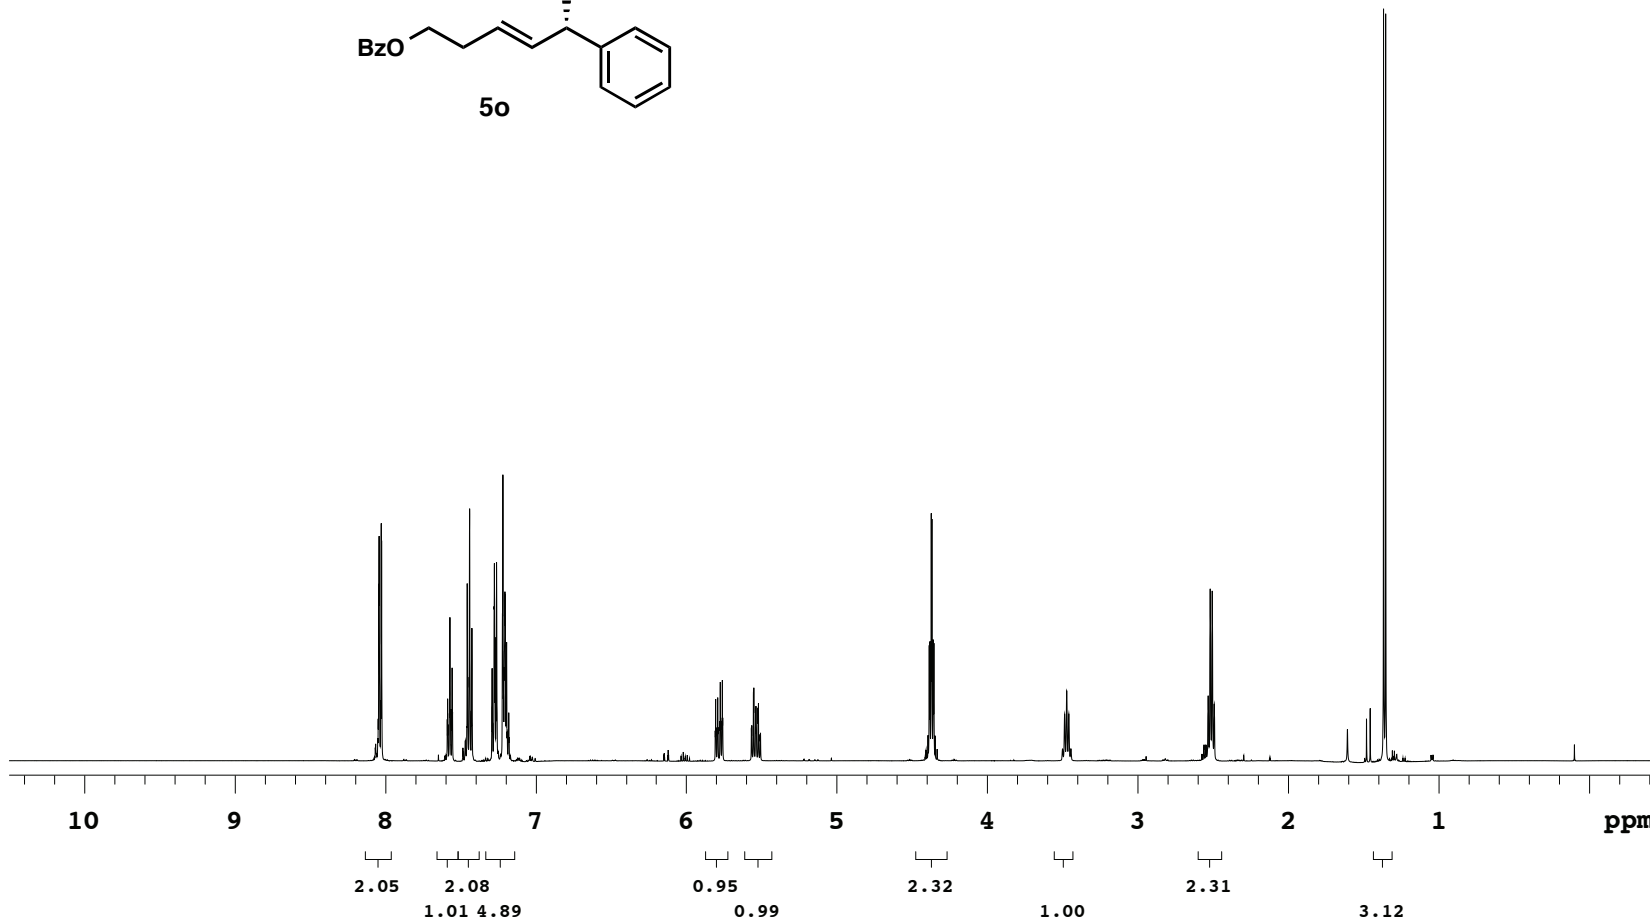

ahc-7-239-4

Sample Name **ahc-7-239-4**  
Date collected **2014-07-13**

Pulse sequence **CARBON**  
Solvent **cdcl3**

Temperature **25**  
Spectrometer **-vnmrs400**

Study owner **acherney**  
Operator **autouser**

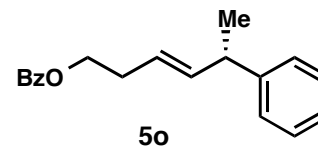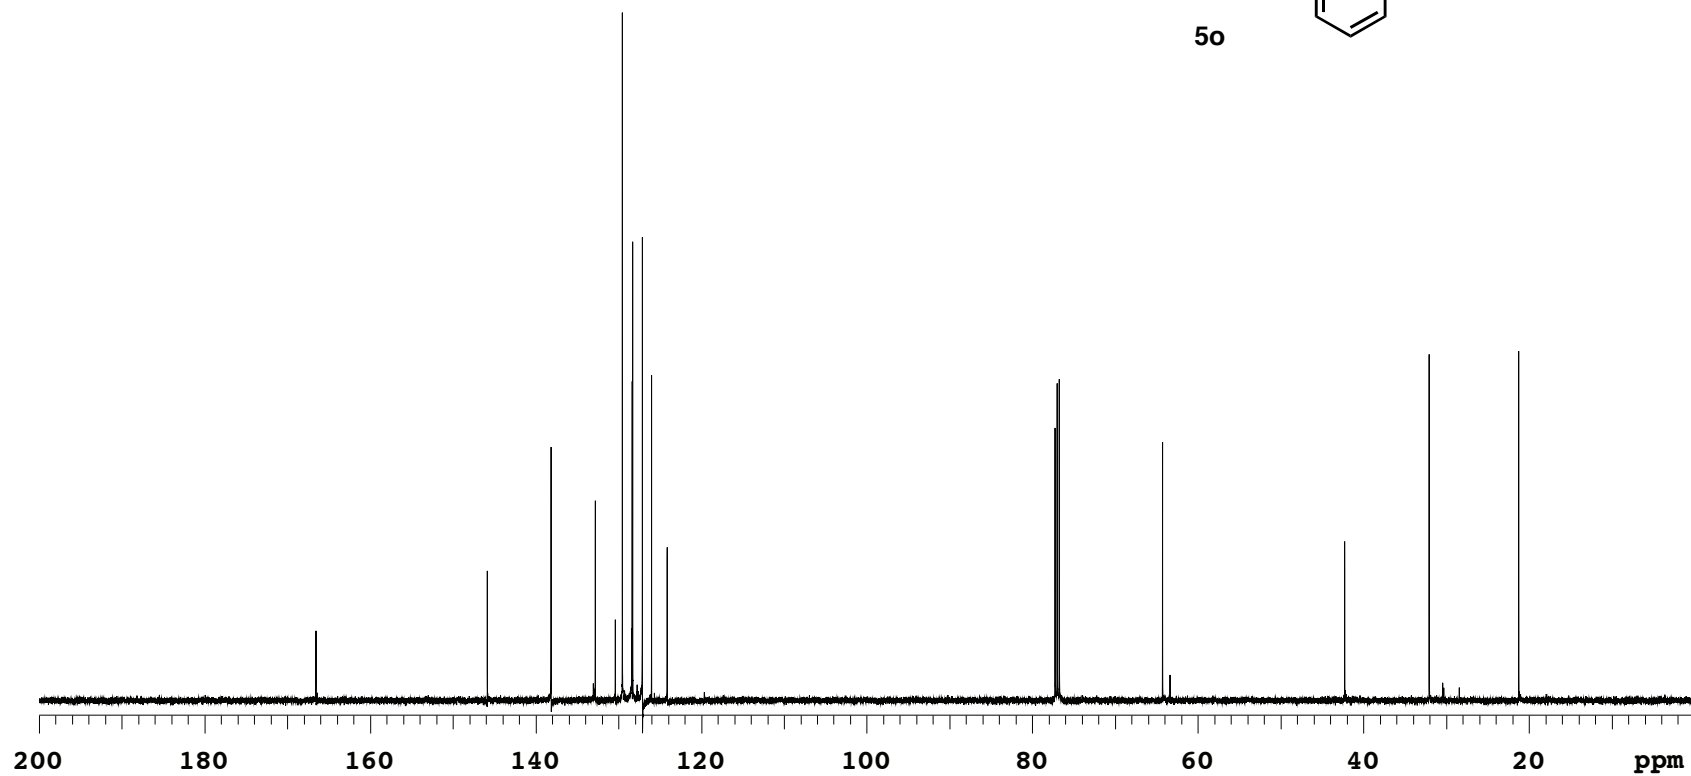

ahc-7-239-1

Sample Name **ahc-7-239-1**  
Date collected **2014-07-13**

Pulse sequence **PROTON**  
Solvent **cdcl3**

Temperature **25**  
Spectrometer **-vnmrs400**

Study owner **acherney**  
Operator **autouser**

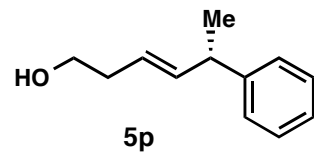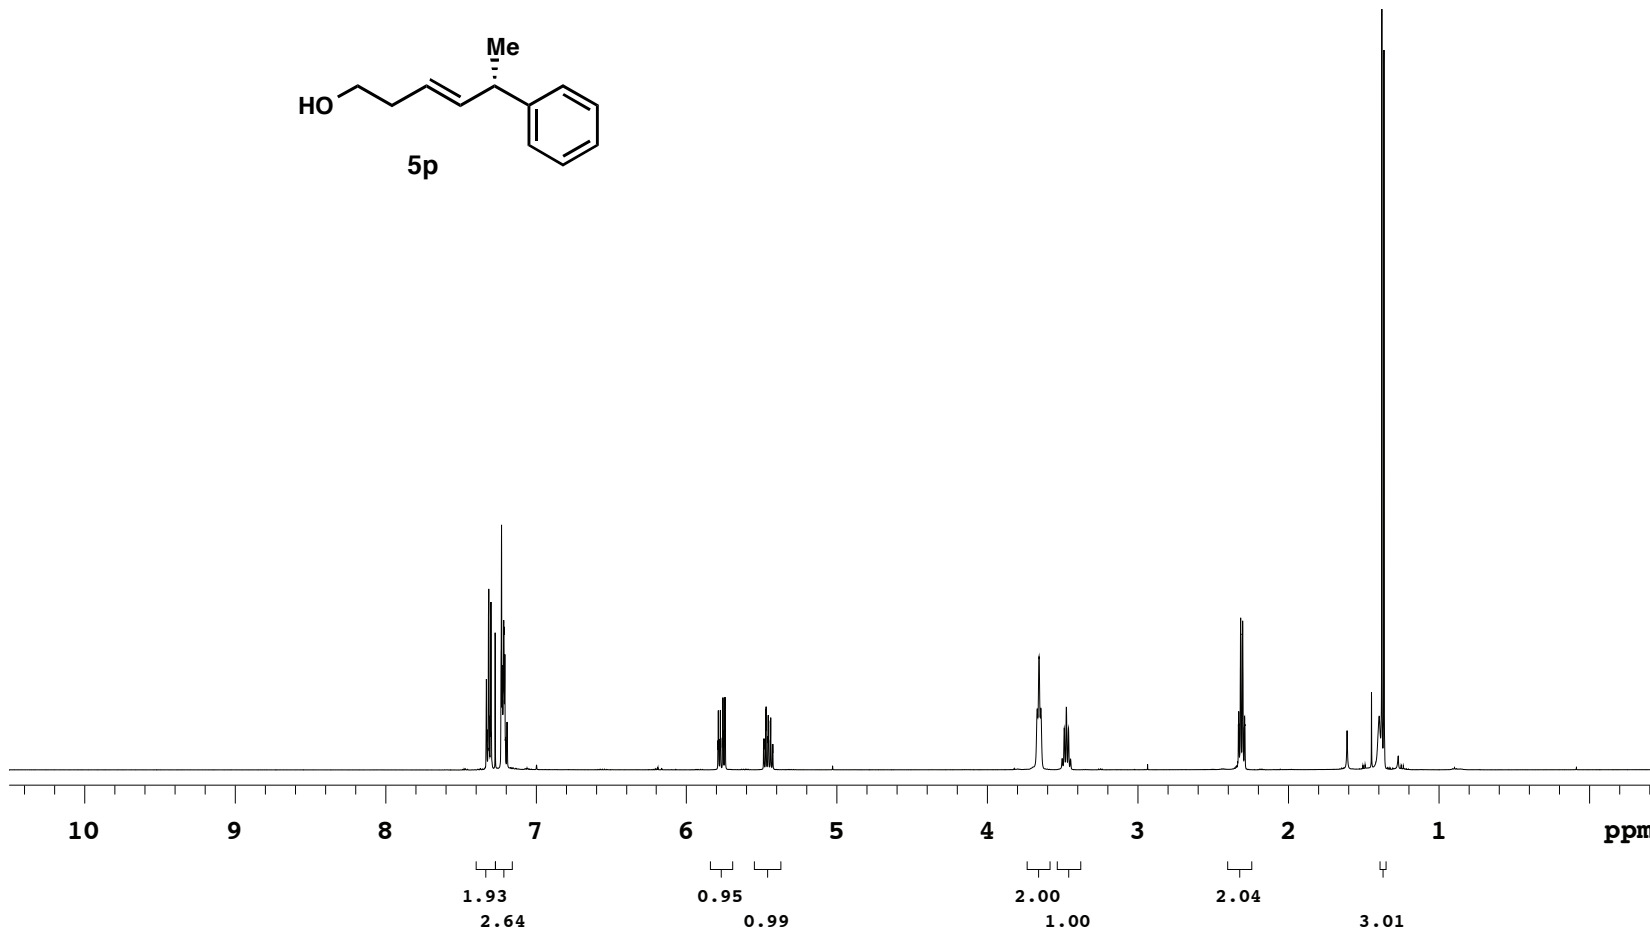

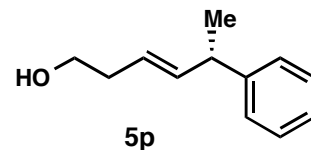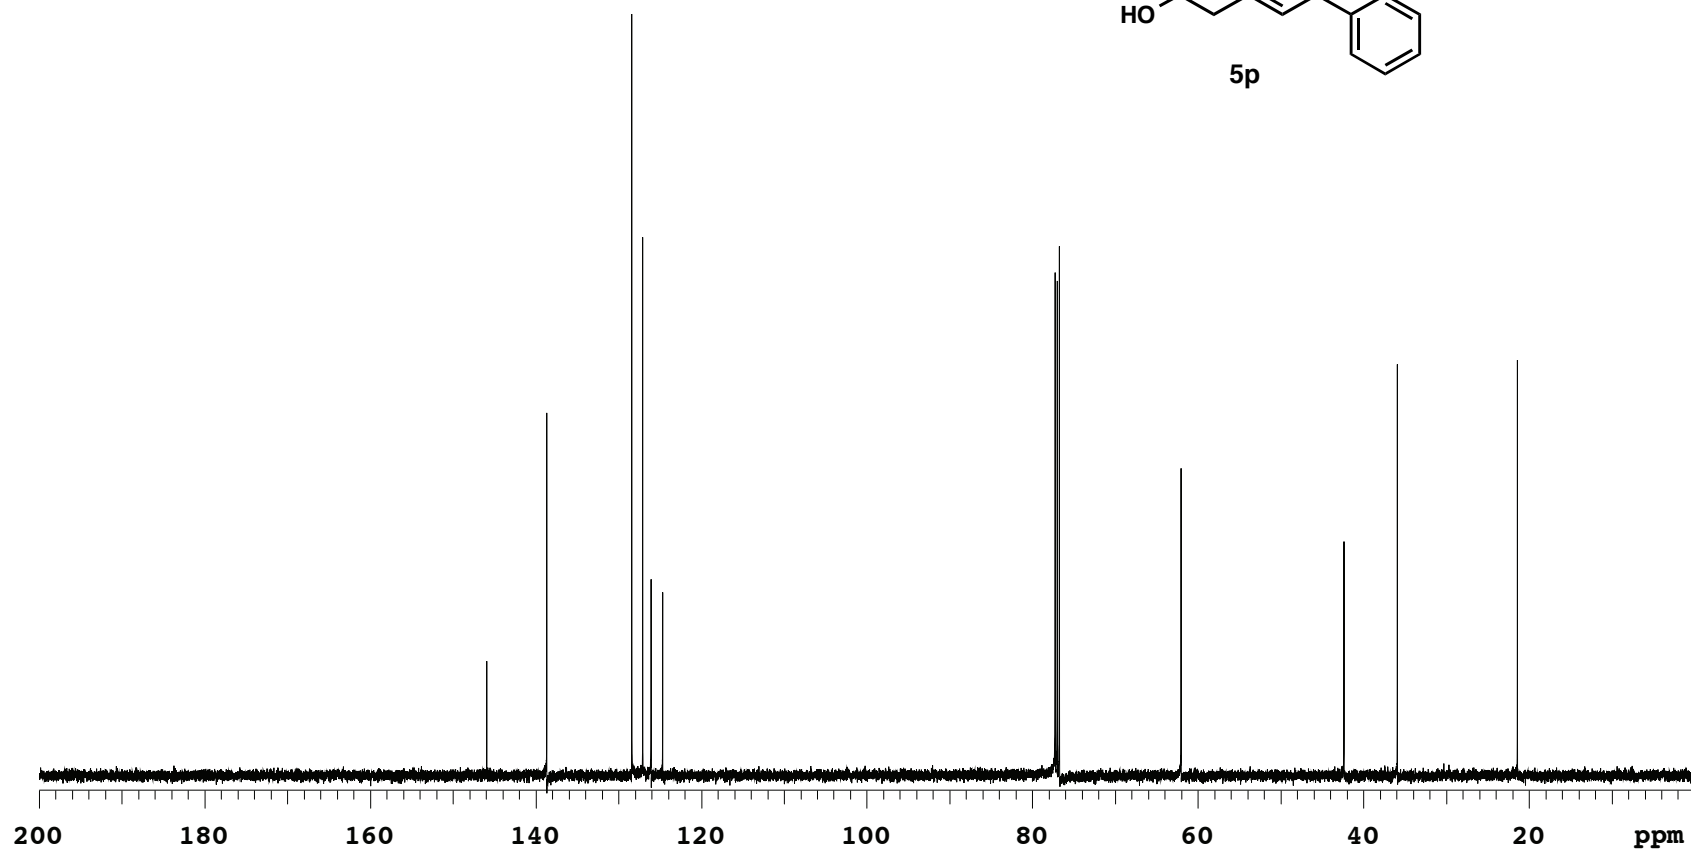



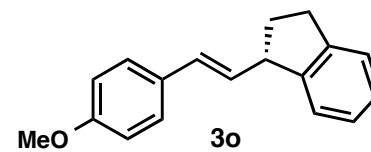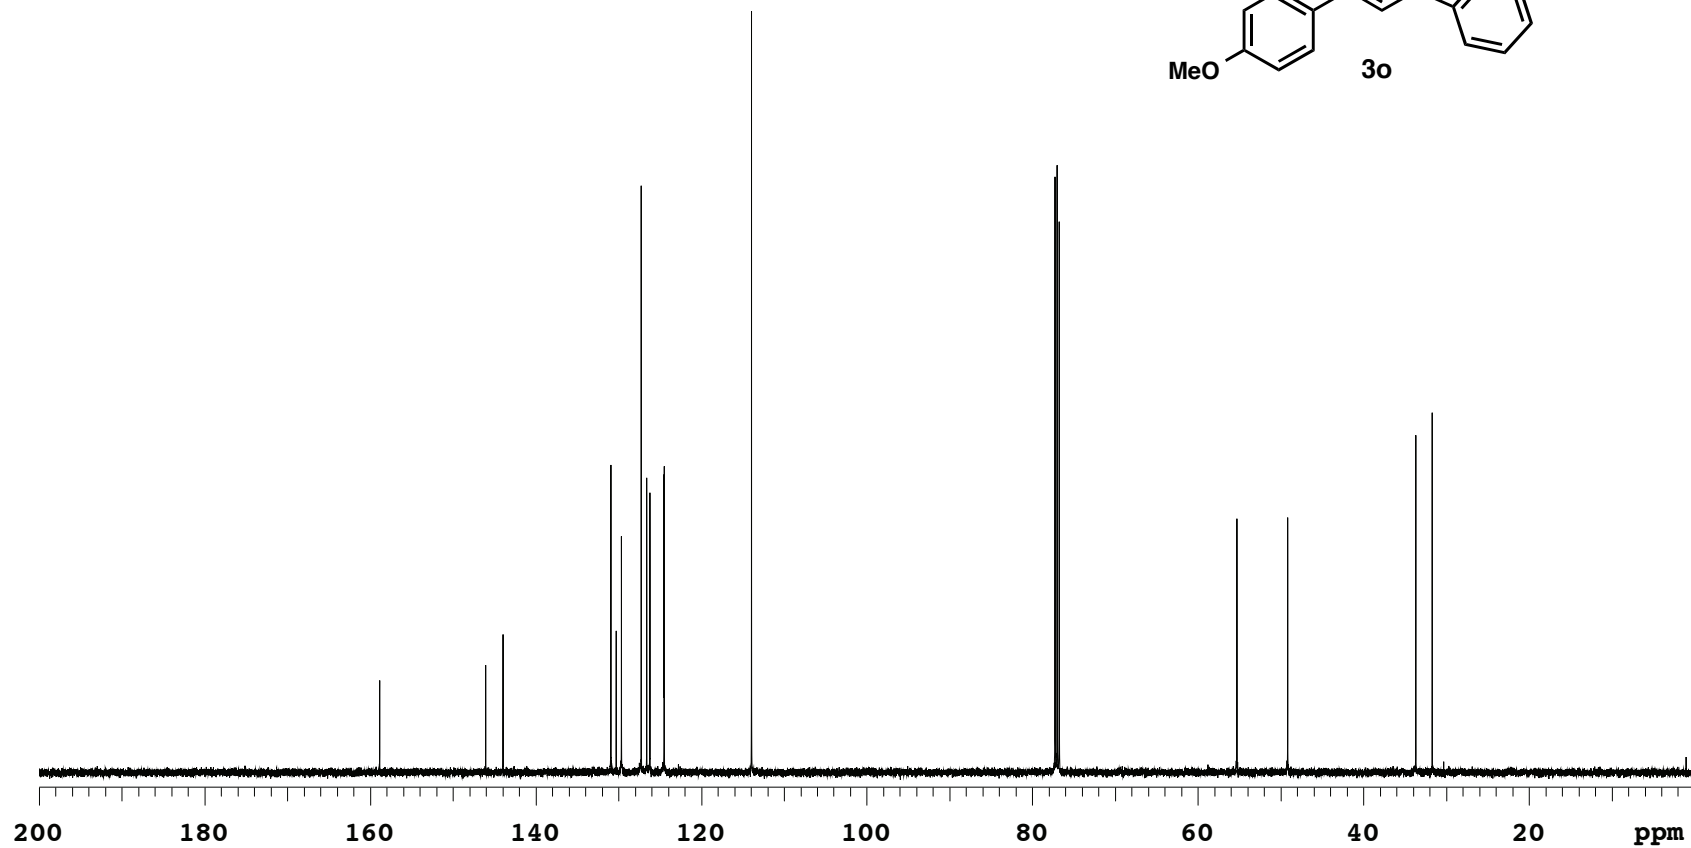



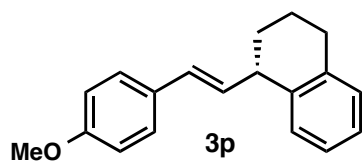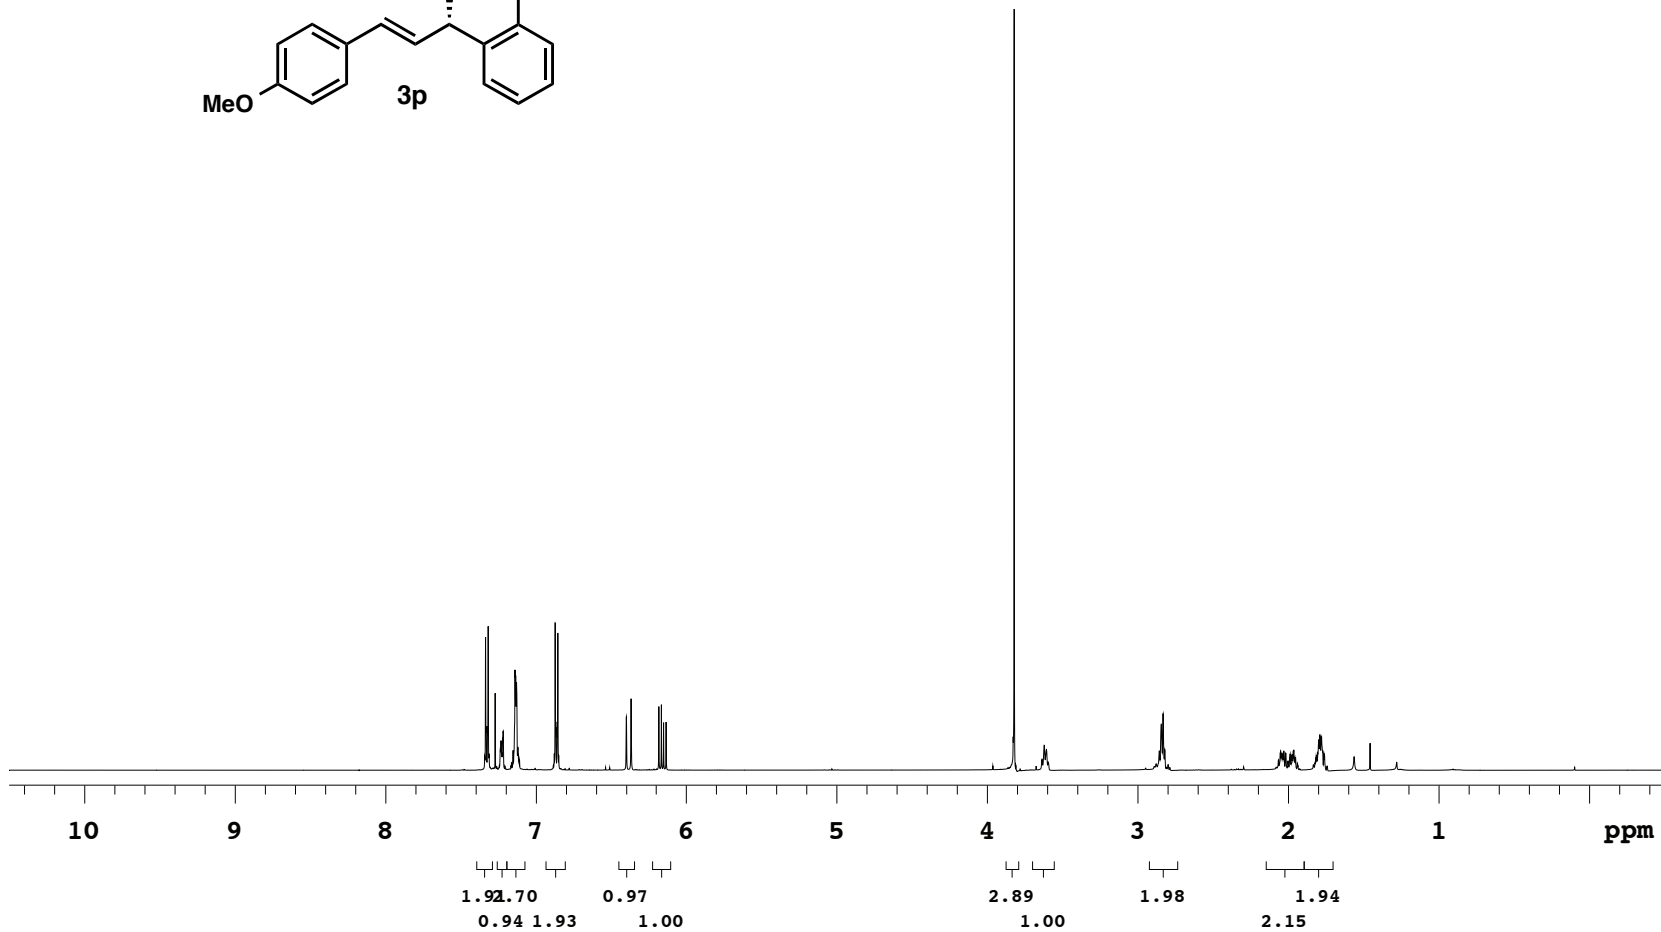

ahc-7-223-7

Sample Name **ahc-7-223-7**  
Date collected **2014-07-13**

Pulse sequence **CARBON**  
Solvent **cdcl3**

Temperature **25**  
Spectrometer **-vnmrs400**

Study owner **acherney**  
Operator **autouser**

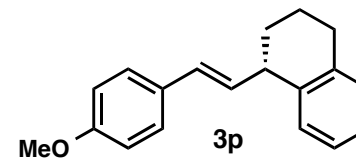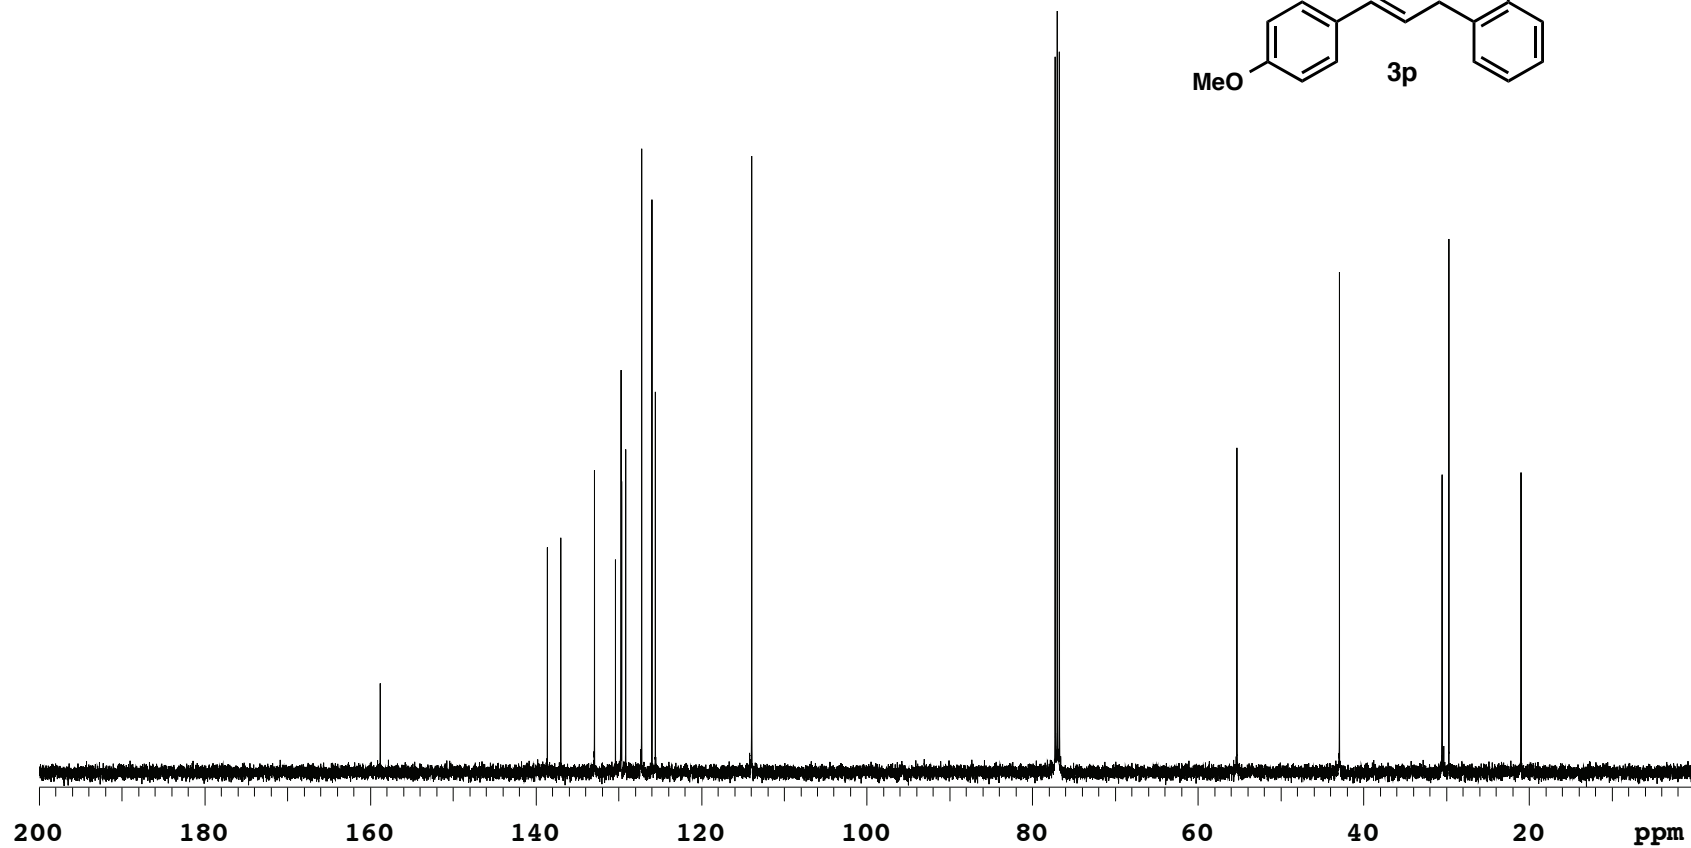

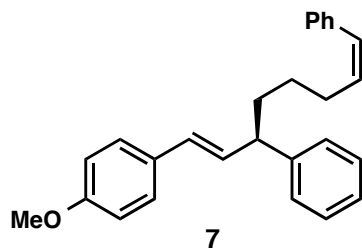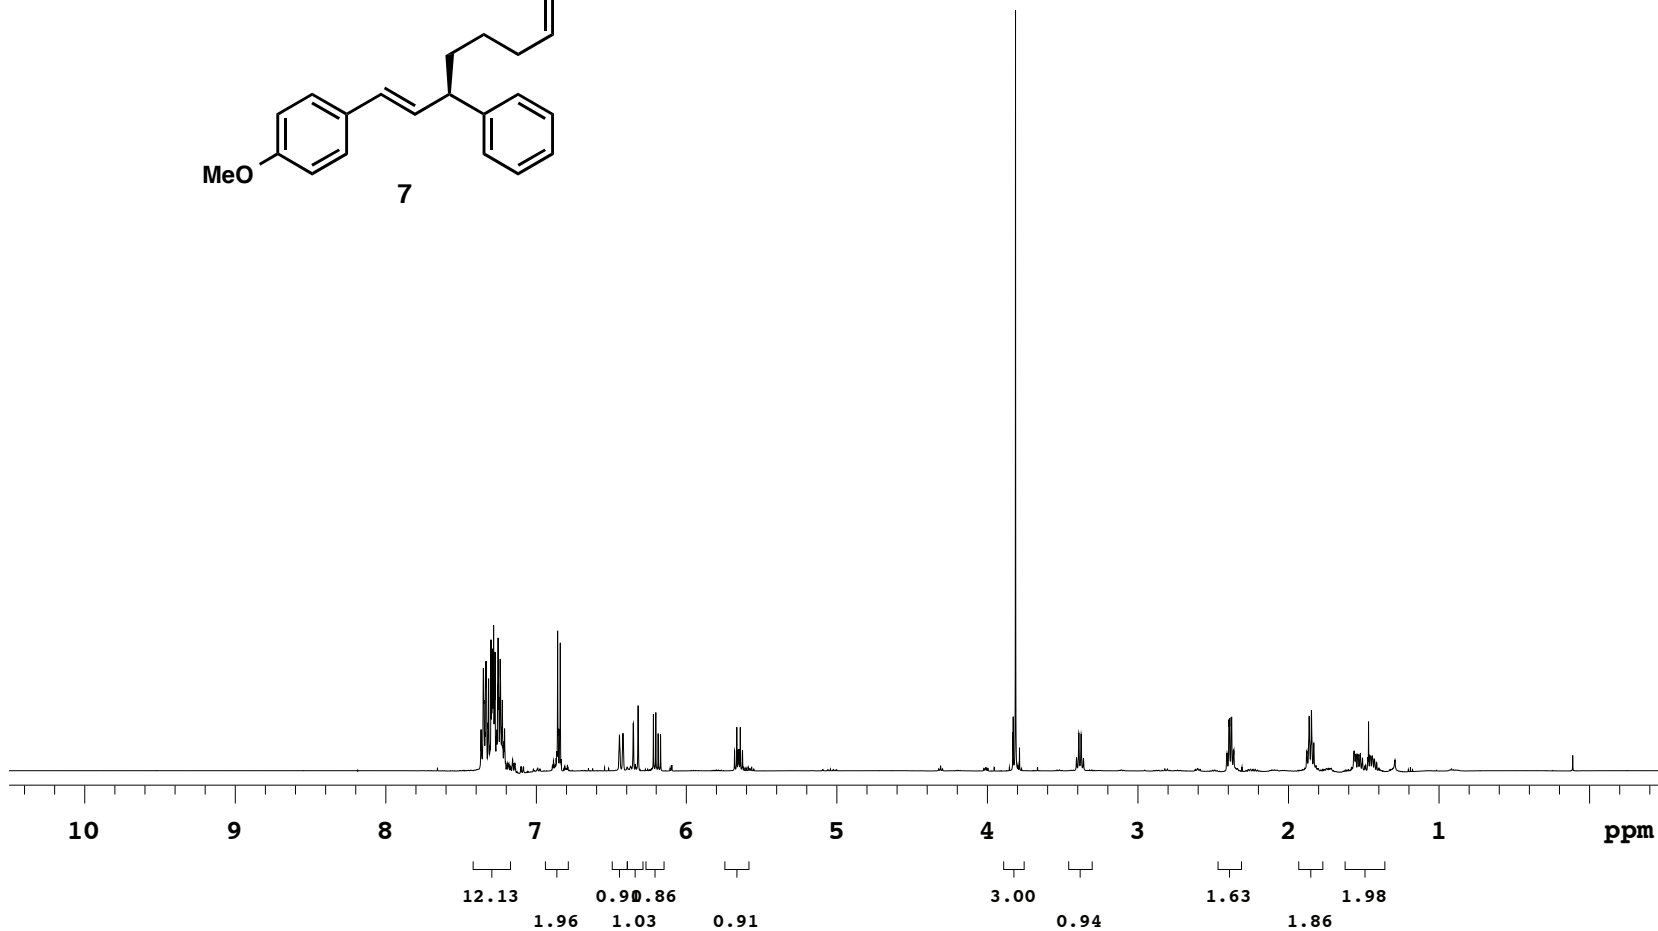

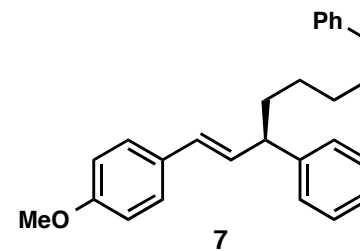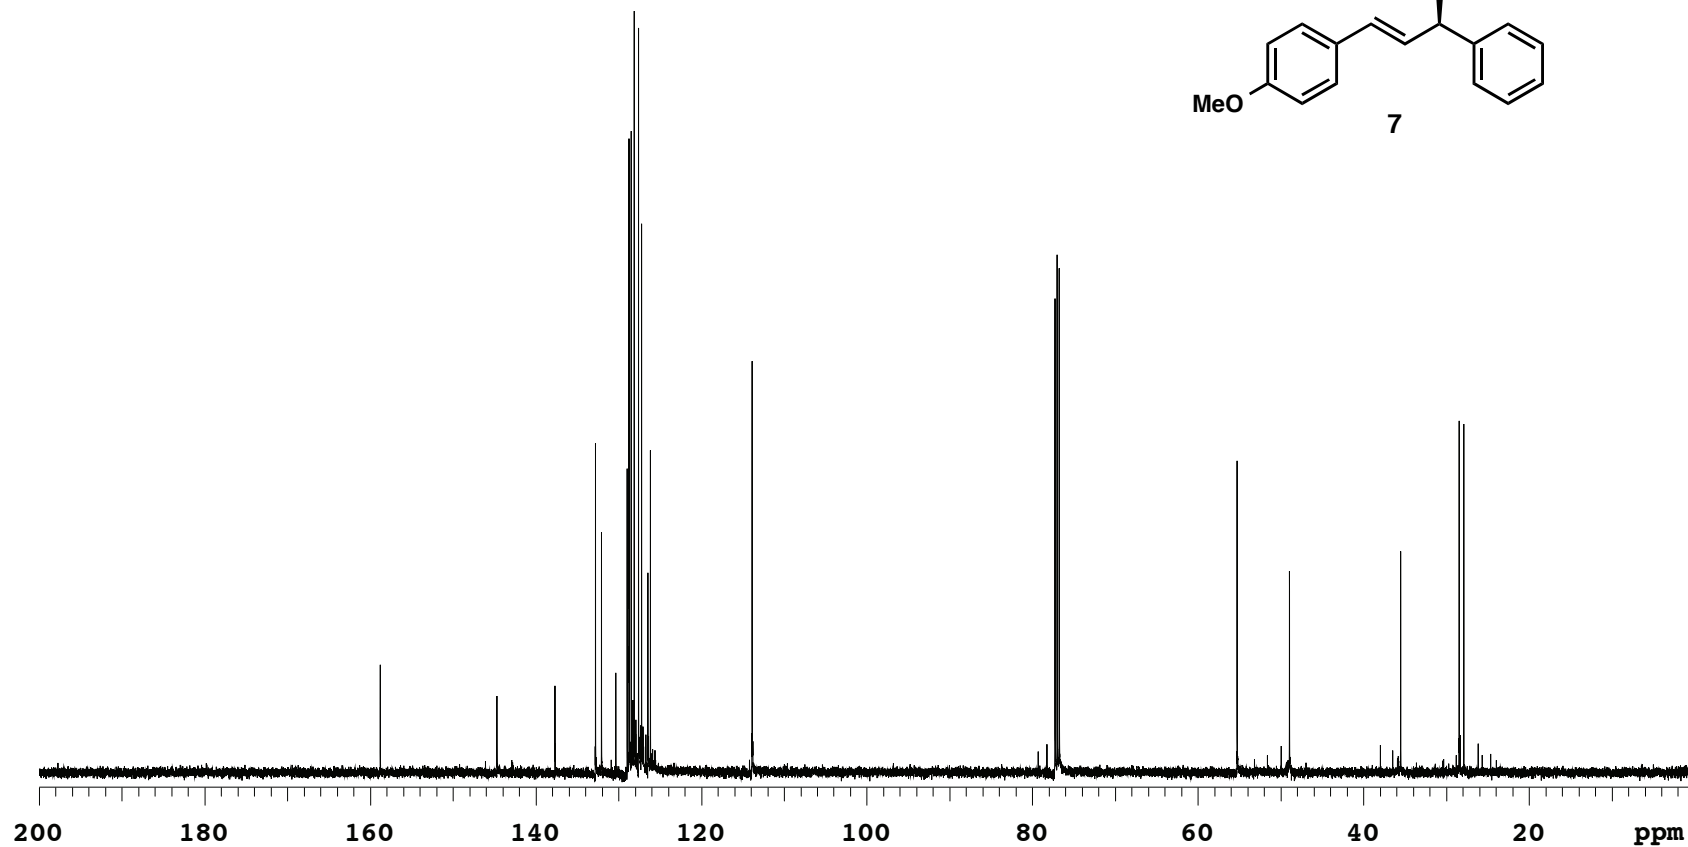

Supplement: ja508067c_si_001.pdf [file ja508067c_si_001.pdf]
